# Supplementary material for: Lineage identity governs oncogene dependence in murine NSCLC models of KRAS inhibitor resistance
Source: Research Square preprint supplement (doi:10.21203/rs.3.rs-7058952/v1), 2025-07-24
Supplement: Supplementary file 1 [file ef7d68839a635487ddc9ead7.xlsx]

## Sheet: ST1 - Primers
Mouse genotyping primers
LSL-KrasG12D	GTC TTT CCC CAG CAC AGT GC
	CTC TTG CCT ACG CCA CCA GCT C
	AGC TAG CCA CCA TGG CTT GAG TAA GTC TGC A
LSL Kras G12C F	cttgtggtggttggagcat
LSL Kras G12C R	aaagccttggaactaaaggaca
Universal LSL-Kras primers	GTTACCTCTATCGTAGGGTC
	ACACAAAGGTGAGTGTTAAAATATTGA
	AGTTTTTGATAATCTTGTGTGAGACA
p53 flox F	GAAGACAGAAAAGGGGAGGG
p53 flox R	AAGGGGTATGAGGGACAAGG
R26 LSL-Cas9/PE2	AAGGGAGCTGCAGTGGAGTA		R26 F
	CCGAAAATCTGTGGGAAGTC		R26 R
	GAAGAAGAATGGCCTGTTCG		Cas9 F
	TCCTCGCTCTTTCTGGTCAT		Cas9 R
R26 LSL-dCas9 VPR	acctgaatgcagtggtaggc		dCas9 F
	cggccgttttcaagctcaa		dCas9 R
	AAGGGAGCTGCAGTGGAGTA		R26 F
	CCGAAAATCTGTGGGAAGTC		R26 R
Mouse qPCR primer sequences
Dsc3 qPCR F 1	GGAATGAGGAATGGTGGGCA
Dsc3 qPCR R 1	TGTCCTCTAATGGAGTCTTCACC
Krt6a qPCR F 1	TCGTGACCCTGAAGAAGGATG
Krt6a qPCR R 1	TCCAGGCTACGGTTGTTGTC
Krt14 qPCR F 1	GAACCACGAGGAGGTGGC
Krt14 qPCR R 1	CATGCAGTAACGGCCTTTGG
Gapdh qPCR F	TGCACCACCAACTGCTTAGC
Gapdh qPCR R	GGCATGGACTGTGGTCATGAG
Krt5 qPCR F	TGGACCAGTCAACATCTCTGT
Krt5 qPCR R	AGCTCATGCCTCCTTGACTG
Sftpd qPCR F	TCTCCCACTATCAGAAAGCTGC
Sftpd qPCR R	CTCAGTAGCAGAACGTGGGG
Grhl3 qPCR primer F	CTCCCCCAAAGCCATTCACA
Grhl3 qPCR primer R	CCATCACCACGCTCTTGACTT
Zfp750 qPCR primer F	AGCGTGAGAACAGATCCTGC
Zfp750 qPCR primer R	GAGAGTTCCTTCCGTCAGGC
Irx4 qPCR primer F	CTTTCCTGGCGCAGAGCCT
Irx4 qPCR primer R	GGGAGTTGGTGGTCATCAGG
Sox15 qPCR primer F	TGGAGGAGGCTAAGCGTCTT
Sox15 qPCR primer R	CTTCTTGGCTAAAGGGGACAG
Hes2 qPCR primer F	ATCCGTGGGCGTGAATGAAG
Hes2 qPCR primer R	GCGGCTTTAGGTTCTTGCG
DNTrp63 qPCR primer F	CCTGGAAAACAATGCCCAGAC
DN Trp63 qPCR primer R	GAGGAGCCGTTCTGAATCTGC
Sox2 qPCR primer F (UTR)	CCCCTTTTATTTTCCGTAGTTGTAT
Sox2 qPCR primer R (UTR)	TCAAACTGTGCATAATGGAGTAAAA
Mouse NGS sequencing primers
KrasG12_seq_F_illumina_adapt	TCCCTACACGACGCTCTTCCGATCTNNNNNNGTTACCTCTATCGTAGGGTC
KrasG12_seq_R_illumina_adapt	GTTCAGACGTGTGCTCTTCCGATCTNNNNNNACACAAAGGTGAGTGTTAAAATATTGA
Kras cDNA codon 12 NGS primer F	TCCCTACACGACGCTCTTCCGATCTNNNNNNAAACTTGTGGTGGTTGGAGC
Kras cDNA codon 12 NGS primer R	GTTCAGACGTGTGCTCTTCCGATCTNNNNNNAGAAAGCCCTCCCCAGTTCT

## Sheet: ST2 - sgRNA sequences
sgRNA sequences
caccCTTGTGGTGGTTGGAGCTGG	sgKrasWT T
aaacCCAGCTCCAACCACCACAAG	sgKras WT B
caccTCTTACCAGGATTCCATCCA	sgRb1 (from Rogers et al 2017) Top
aaacTGGATGGAATCCTGGTAAGA	sgRb1 (from Rogers et al 2017) Bottom
CACCAAGAAAGTGGGCATGGAGGG	Nkx2.1 sgRNA T
AAACCCCTCCATGCCCACTTTCTT	Nkx2.1 sgRNA B
CACCGCCACAGGCCAGATCCAACA	Olfr T
AAACTGTTGGATCTGGCCTGTGGC	Olfr B
caccGAAAGGGAGGAGACAAACGT	Grhl3 CRISPRa T
aaacACGTTTGTCTCCTCCCTTTC	Grhl3 CRISPRa B
CACCGGAGCCAATATTCCGTAGCA	Sox2 CRISRPRa T
AAACTGCTACGGAATATTGGCTCC	Sox2 CRISRPRa B
CACCGAATCCATCAACTTCCACCT	∆NTrp63 CRISPRa T
AAACAGGTGGAAGTTGATGGATTC	∆NTrp63 CRISPRa B
caccGGTGGGAGGGATTTAAGTGT	Zfp750 CRISPRa T
aaacACACTTAAATCCCTCCCACC	Zfp750 CRISPRa B
caccGTGGGAAGAACAAGACGCCT	Sox15 CRISPRa T
aaacAGGCGTCTTGTTCTTCCCAC	Sox15 CRISPRa B
caccGCGAGCGAGTTGCTCCCACC	Irx4 CRISPRa T
aaacGGTGGGAGCAACTCGCTCGC	Irx4 CRISPRa B
caccGCGCTGGCCCGACTCAATGG	Hes2 CRISPRa T
aaacCCATTGAGTCGGGCCAGCGC	Hes2 CRISPRa B

## Sheet: ST3 - Hashtag Oligos
10X oligo	Sequence
CMO303	CCGTCGTCCAAGCAT
CMO304	AACGTTAATCACTCA
CMO305	CGCGATATGGTCGGA
CMO306	AAGATGAGGTCTGTG
CMO307	AAGCTCGTTGGAAGA
CMO308	CGGATTCCACATCAT
CMO309	GTTGATCTATAACAG
CMO310	GCAGGAGGTATCAAT
CMO311	GAATCGTGATTCTTC

## Sheet: ST4 - scRNA DEG
Leiden cluster markers (resolution 0.5)							Annotation markers							Pseudobulk Sotorasib vs Vehicle - Wilcoxon					Pseudobulk Vehicle vs Sotorasib- Wilcoxon
Leiden cluster	gene	scores	logfoldchanges	pvals	pvals_adj		Annotation	Gene	scores	logfoldchanges	pvals	pvals_adj		Sotorasib_names	Sotorasib_pvals	Sotorasib_logfoldchanges	-log10(pvalue)		Vehicle_names	Vehicle_scores	Vehicle_pvals	Vehicle_pvals_adj	Vehicle_logfoldchanges
0	Sftpc	66.9641	3.14344	0	0		Gastric-like	Gstm1	52.6148	3.46001	0	0		H2-Aa	3.26141e-223	1.74073	222.487		Tpt1	37.9265	0	0	0.89857
0	Lyz2	66.0478	4.8021	0	0		Gastric-like	A2ml1	48.9404	3.37769	0	0		Lyz2	2.08315e-219	2.20751	218.681		Rps18	36.7763	4.42144e-296	4.6613e-292	1.14522
0	Cd74	60.5264	2.65767	0	0		Gastric-like	Gsta3	48.1068	3.82471	0	0		Hc	6.56439e-206	2.069	205.183		Rps24	34.9589	9.4898e-268	6.66975e-264	0.876183
0	Cxcl15	60.4905	3.09452	0	0		Gastric-like	Fmo2	47.0887	3.67371	0	0		Slc34a2	3.22066e-200	1.4368	199.492		Hsp90ab1	34.3954	2.95507e-259	1.55769e-255	1.02841
0	Scd1	59.2364	3.47861	0	0		Gastric-like	Apoc1	45.7236	2.98409	0	0		Sftpc	3.12215e-193	1.38073	192.506		Rps28	33.9576	9.42073e-253	3.97272e-249	0.815161
0	Elovl1	58.9391	2.9391	0	0		Gastric-like	Mgst1	45.3264	1.79179	0	0		Cbr2	4.59955e-183	2.13349	182.337		Rpl13	33.414	8.58734e-245	3.01773e-241	0.825246
0	Lamp3	58.8837	2.99445	0	0		Gastric-like	Fras1	44.7515	3.78761	0	0		Lamp3	1.76858e-180	1.46218	179.752		Rpl32	33.0402	2.15286e-239	6.48473e-236	0.948493
0	H2-Aa	58.4895	3.09243	0	0		Gastric-like	Tmeff2	44.5758	4.24365	0	0		Cd74	2.87121e-173	1.26918	172.542		Uba52	32.9218	1.07249e-237	2.82668e-234	0.955966
0	Slc34a2	57.8995	2.86697	0	0		Gastric-like	Eef1b2	43.9106	1.67054	0	0		Ank3	1.2314e-160	1.1707	159.91		Rpl37	32.7915	7.78606e-236	1.8241e-232	0.826218
0	Sftpa1	57.839	2.68972	0	0		Gastric-like	Trf	43.7612	2.69007	0	0		Alcam	1.39749e-159	0.755509	158.855		Rpl12	32.5037	9.44242e-232	1.99093e-228	1.07917
0	Chil1	57.4585	3.4144	0	0		Gastric-like	Parm1	43.563	2.74827	0	0		Napsa	3.68856e-155	1.41715	154.433		Rpl28	32.0475	2.37818e-225	4.55853e-222	0.850749
0	Napsa	57.4207	2.99053	0	0		Gastric-like	Rpl37a	43.0905	1.23714	0	0		Sftpa1	2.32709e-144	1.10625	143.633		Rpl17	31.9569	4.3263e-224	7.60167e-221	0.849727
0	Cbr2	56.0902	3.88019	0	0		Gastric-like	Adgrl3	42.0098	3.69425	0	0		H2-Ab1	1.76162e-140	1.3203	139.754		Rps2	31.7748	1.44415e-221	2.17499e-218	1.00509
0	Fasn	55.9086	2.68485	0	0		Gastric-like	Rps9	41.8169	1.18957	0	0		Cxcl15	6.59861e-137	1.29749	136.181		Rpl15	31.7065	1.26324e-220	1.77569e-217	0.984726
0	Hc	55.2892	3.72757	0	0		Gastric-like	2610307P16Rik	41.6832	2.81009	0	0		Kcnj15	8.48763e-121	1.69261	120.071		Rpl23	31.5705	9.36866e-219	1.16199e-215	0.761753
0	H2-Ab1	53.1062	2.58989	0	0		Gastric-like	Pgrmc1	41.4656	2.71219	0	0		Ppp1r14c	2.89139e-113	1.16019	112.539		Rpl13a	30.9507	2.48569e-210	2.91171e-207	0.792455
0	Lpcat1	52.8311	2.07695	0	0		Gastric-like	Akr1c19	41.4401	2.46507	0	0		Lpcat1	1.86643e-111	0.88455	110.729		Rps10	30.9325	4.3664e-210	4.84556e-207	0.781885
0	Npc2	52.7978	1.56577	0	0		Gastric-like	Ros1	41.2334	2.52401	0	0		Fasn	7.74885e-111	1.08159	110.111		Rpl35	30.9188	6.67394e-210	7.036e-207	0.946622
0	Lcn2	50.4013	2.90701	0	0		Gastric-like	Elmo1	41.1677	2.72304	0	0		Elovl1	6.20028e-110	1.10957	109.208		Rpl10a	30.7232	2.79162e-207	2.80292e-204	0.952305
0	Sftpd	50.3991	1.94097	0	0		Gastric-like	Gpc6	40.9415	3.33432	0	0		Etv5	6.23598e-105	1.28237	104.205		Rpl6	30.5761	2.54567e-205	2.33371e-202	0.786967
0	Ppp1r14c	48.1133	2.44182	0	0		Gastric-like	Kcnmb2	40.8956	3.77702	0	0		Chil1	1.04588e-102	1.3124	101.981		Rps3a1	30.3336	4.12848e-202	3.62704e-199	0.745793
0	H2-K1	46.7588	1.78451	0	0		Gastric-like	Cyp2c68	40.8743	4.50137	0	0		H2-Eb1	7.28269e-98	1.10508	97.1377		Gas5	30.1214	2.54253e-199	2.06189e-196	1.27159
0	Chchd10	46.6776	1.71242	0	0		Gastric-like	Rpl22l1	40.7762	1.69899	0	0		Sftpd	7.27366e-92	0.756645	91.1382		Gm11808	29.5364	9.83173e-192	7.40365e-189	1.03241
0	H2-D1	45.5549	1.78112	0	0		Gastric-like	Rbp4	40.6753	2.3641	0	0		Entpd1	7.17436e-90	1.32342	89.1442		Kalrn	29.53	1.18478e-191	8.61416e-189	0.973792
0	Rnase4	45.5097	2.04965	0	0		Gastric-like	Rps3	40.3151	1.24781	0	0		Rbms3	3.39591e-86	0.89363	85.469		Rpl34	29.351	2.32168e-189	1.63175e-186	0.756215
1	Gstm1	53.0697	3.92585	0	0		AT2-like	Lyz2	73.7541	5.04853	0	0		H2-K1	1.79997e-82	0.743245	81.7447		Rpl36	29.3451	2.75563e-189	1.87427e-186	0.731276
1	Gsta3	51.2743	4.29175	0	0		AT2-like	Slc34a2	70.9708	3.31145	0	0		Scd1	6.1415e-82	1.09035	81.2117		Rps14	29.2563	3.73381e-188	2.46023e-185	0.707761
1	A2ml1	47.4451	3.59411	0	0		AT2-like	Lamp3	70.8784	3.51083	0	0		Mid1ip1	4.68273e-79	1.30689	78.3295		Rpl26	28.9989	6.78914e-185	4.33785e-182	0.718358
1	Fmo2	47.2798	3.94856	0	0		AT2-like	Hc	69.6916	4.99474	0	0		Ccdc141	3.22398e-78	0.882146	77.4916		Fau	28.905	1.0324e-183	6.40241e-181	0.647927
1	Apoc1	46.399	3.30774	0	0		AT2-like	Sftpc	67.6056	3.03642	0	0		Lcn2	4.34144e-77	1.11783	76.3624		Eef1b2	28.6508	1.56753e-180	9.18091e-178	1.03882
1	Rpl37a	46.1355	1.44413	0	0		AT2-like	Scd1	66.9513	3.73151	0	0		Lgi3	1.22956e-76	0.9561	75.9102		Rpl27a	28.4843	1.83436e-178	1.01783e-175	0.689163
1	Mgst1	45.3359	1.97007	0	0		AT2-like	Chil1	66.3655	3.78269	0	0		Abca3	1.91192e-74	0.65372	73.7185		Rpl37a	28.4128	1.40316e-177	7.58607e-175	0.718968
1	Trf	44.6734	3.06344	0	0		AT2-like	Cxcl15	66.236	3.22758	0	0		Chchd10	4.58394e-72	0.643957	71.3388		Rpl18	28.2156	3.76703e-175	1.98569e-172	0.68542
1	Eef1b2	44.3548	1.86372	0	0		AT2-like	Napsa	63.296	3.2078	0	0		Lrrk2	1.86508e-70	0.807824	69.7293		Rps16	28.203	5.37784e-175	2.76566e-172	0.749862
1	Cyp2c68	44.3045	4.86464	0	0		AT2-like	Cd74	62.9957	2.62787	0	0		Nrp1	8.69076e-70	0.909437	69.0609		Rpl8	27.9957	1.83092e-172	8.97789e-170	0.700932
1	Tmeff2	43.5588	4.33595	0	0		AT2-like	H2-Aa	62.6361	3.3639	0	0		Egfl6	7.36718e-69	0.84874	68.1327		Rps11	27.9644	4.40479e-172	2.11079e-169	0.785875
1	Rpl7	42.8491	1.45719	0	0		AT2-like	Elovl1	62.5836	3.06216	0	0		Gm42418	1.10573e-65	0.476924	64.9564		Rack1	27.8923	3.31136e-171	1.55156e-168	0.831641
1	Mdk	42.1853	4.49205	0	0		AT2-like	Ank3	61.7795	2.5098	0	0		Iqgap1	4.40765e-64	0.372259	63.3558		Rps20	27.8813	4.50207e-171	2.06361e-168	0.68227
1	Apob	41.5653	3.71244	0	0		AT2-like	Ppp1r14c	61.2992	3.08363	0	0		Tmem243	8.86917e-64	0.662894	63.0521		Rps5	27.8252	2.15185e-170	9.65356e-168	0.804784
1	Kcnmb2	41.5107	3.93153	0	0		AT2-like	Sftpa1	60.9552	2.7042	0	0		H2-D1	1.59034e-63	0.678631	62.7985		Rplp0	27.7493	1.77796e-169	7.81007e-167	0.774895
1	Fras1	40.7851	3.4954	0	0		AT2-like	Fasn	59.6009	2.88333	0	0		Nkd1	9.53472e-62	1.62233	61.0207		Rpl19	27.7377	2.45391e-169	1.05593e-166	0.676023
1	Rps21	40.7051	1.35679	0	0		AT2-like	Lpcat1	59.1002	2.22097	0	0		App	1.09083e-61	0.489001	60.9622		Rpl18a	27.5326	7.14503e-167	3.01306e-164	0.681329
1	Rps9	40.6157	1.26777	0	0		AT2-like	Cbr2	58.6927	4.2852	0	0		Dram1	1.75462e-61	0.497235	60.7558		Rps3	27.4096	2.10776e-165	8.71415e-163	0.775789
1	Gas5	39.8943	1.87189	0	0		AT2-like	Lcn2	58.3728	3.20073	0	0		Snx25	2.06313e-61	0.70979	60.6855		Rpl30	27.3031	3.90192e-164	1.58216e-161	0.724225
1	Adgrl3	39.604	3.44815	0	0		AT2-like	Sftpd	55.0916	1.99697	0	0		Abcd3	7.02931e-61	0.725866	60.1531		Gm2000	27.1503	2.51061e-162	9.98797e-160	0.865219
1	Rpl23	39.5551	1.17345	0	0		AT2-like	H2-Ab1	55.0391	2.70605	0	0		Il33	1.90119e-60	1.01908	59.721		Gapdh	27.0445	4.42777e-161	1.72888e-158	1.01877
1	Pgrmc1	39.5481	2.73978	0	0		AT2-like	Lrg1	53.1118	3.97128	0	0		Rbpjl	9.15413e-60	1.25584	59.0384		Rps8	26.966	3.69903e-160	1.39275e-157	0.547034
1	Rbp4	39.4814	2.52933	0	0		AT2-like	Nrp1	52.4667	2.60398	0	0		Cmss1	2.01652e-59	0.49359	58.6954		Clu	26.9024	2.05677e-159	7.47707e-157	1.3228
1	Rpl28	39.4033	1.27605	0	0		AT2-like	H2-K1	51.9489	1.88003	0	0		Cracr2a	2.4245e-59	1.49163	58.6154		Rps23	26.8538	7.62084e-159	2.72348e-156	0.698671
1	Idh1	39.3986	2.60634	0	0		AT2-like	Entpd1	51.6147	3.48052	0	0		Acoxl	1.10732e-58	1.30776	57.9557		Rpl7	26.7554	1.06808e-157	3.75342e-155	0.767691
2	S100a6	38.8993	3.98015	0	0		Endoderm-like	S100a6	52.2263	4.03129	0	0		Mme	1.95861e-56	1.34451	55.7081		Sema3c	26.3216	1.08505e-152	3.69003e-150	1.61848
2	Krt18	38.5089	2.56164	0	0		Endoderm-like	Krt18	47.7386	2.41094	0	0		Gm20629	4.61679e-56	1.53226	55.3357		Rpl7a	26.2352	1.0559e-151	3.5339e-149	0.852414
2	S100a14	37.0101	3.28257	7.8737e-300	5.5339e-296		Endoderm-like	Clu	47.0455	2.81799	0	0		Irx1	1.71234e-52	1.2301	51.7664		St8sia6	26.1009	3.56064e-150	1.17306e-147	1.70016
2	Krt19	35.6969	2.88873	4.42064e-279	2.33023e-275		Endoderm-like	Lgals3	46.7979	3.20532	0	0		Npc2	1.67563e-51	0.392947	50.7758		Rpl24	25.9418	2.24716e-148	7.28945e-146	0.655274
2	Krt7	34.4501	2.77007	4.48346e-260	1.35048e-256		Endoderm-like	Krt7	46.5759	2.91657	0	0		Tmem30a	1.2628e-50	0.575991	49.8987		Rpl31	25.7967	9.64433e-147	3.08107e-144	0.788325
2	Krt8	32.8314	2.21782	2.09725e-236	4.42205e-233		Endoderm-like	Cd9	44.9672	1.89506	0	0		Acsl4	2.13222e-50	0.499423	49.6712		Npm1	25.426	1.30185e-142	4.03668e-140	0.936345
2	Eif1	32.1588	1.27596	6.66282e-227	1.27714e-223		Endoderm-like	Krt19	43.9715	2.75608	0	0		Ramp1	1.12084e-49	1.40016	48.9505		Rpl39	25.0985	5.15785e-139	1.55362e-136	0.670965
2	Lgals3	31.8642	2.82732	8.36162e-223	1.35619e-219		Endoderm-like	S100a14	43.9687	3.03403	0	0		Zbtb20	1.77334e-49	0.405242	48.7512		Hspa8	24.8951	8.40574e-137	2.4616e-134	0.717955
2	Serpinb6a	31.5912	2.03706	4.87667e-219	6.85498e-216		Endoderm-like	S100a11	43.858	1.8648	0	0		Ctsc	3.8738e-49	0.510775	48.4119		Rps7	24.8643	1.81028e-136	5.22873e-134	0.858988
2	Cldn7	31.3739	1.66857	4.59273e-216	6.05235e-213		Endoderm-like	Krt8	43.8383	2.26427	0	0		Ly6e	5.61467e-49	0.571007	48.2507		Prxl2a	24.7036	9.79287e-135	2.79031e-132	1.52326
2	Tmsb10	31.1146	2.24603	1.52668e-212	1.89353e-209		Endoderm-like	Hsp90ab1	42.9753	1.43418	0	0		Srpr	7.57472e-49	1.02673	48.1206		Krt18	24.5949	1.43101e-133	4.02305e-131	1.13654
2	Tnfrsf12a	30.6363	2.53062	4.02778e-206	4.04409e-203		Endoderm-like	Areg	42.0069	2.99189	0	0		Gclc	2.87421e-48	0.620669	47.5415		Rps17	24.4023	1.61571e-131	4.48252e-129	0.738998
2	Npm1	30.5643	1.61744	3.64787e-205	3.49615e-202		Endoderm-like	Rps2	41.4579	1.51632	0	0		Sort1	6.79721e-48	1.12556	47.1677		Rps15	24.3914	2.11049e-131	5.77917e-129	0.617869
2	Itga2	30.5488	3.48176	5.86847e-205	5.37986e-202		Endoderm-like	Anxa1	41.1607	2.61224	0	0		Slco4c1	1.4432e-47	1.01488	46.8407		2410006H16Rik	24.364	4.12369e-131	1.11472e-128	1.34889
2	Clu	30.5348	2.37186	8.98898e-205	7.8972e-202		Endoderm-like	Tnfrsf12a	41.0142	2.71056	0	0		Ptprf	4.64707e-47	0.468483	46.3328		Tpi1	24.3089	1.57675e-130	4.20833e-128	1.13613
2	Rps5	30.4495	1.38659	1.21778e-203	1.02707e-200		Endoderm-like	Anxa5	40.5284	2.01905	0	0		Mettl7a1	2.41971e-46	0.79053	45.6162		Rbp4	24.2634	4.77298e-130	1.25798e-127	1.54244
2	Hsp90ab1	30.2287	1.31563	9.94058e-201	7.76285e-198		Endoderm-like	Gng5	40.1874	1.46426	0	0		Lrp2	1.26171e-45	0.864945	44.899		Rpl38	24.2515	6.38041e-130	1.66088e-127	0.572799
2	2200002D01Rik	30.1385	2.28584	1.51632e-199	1.14184e-196		Endoderm-like	Tmsb10	39.2653	2.16478	0	0		Itga9	1.03784e-44	0.603257	43.9839		Eef1a1	24.1942	2.56312e-129	6.59065e-127	0.55228
2	Ndnf	29.9339	2.89915	7.1232e-197	5.17906e-194		Endoderm-like	Nlrp4e	38.1874	2.21035	0	0		Slc26a4	1.16319e-44	1.84422	43.9343		Celf4	24.1267	1.31048e-128	3.3291e-126	1.85989
2	Lmo7	29.4593	2.16441	9.56877e-191	6.50831e-188		Endoderm-like	S100a16	37.9409	2.41663	0	0		Adk	1.81774e-44	0.45175	43.7405		Rpsa	23.979	4.60197e-127	1.15515e-124	0.653871
2	Nlrp4e	28.7085	2.10718	2.99068e-181	1.70428e-178		Endoderm-like	Emp1	37.7434	3.25827	0	0		Lrg1	5.54379e-44	1.06545	43.2562		Rpl11	23.9008	3.00218e-126	7.44716e-124	0.569174
2	Pfn1	28.408	1.42549	1.61209e-177	8.71565e-175		Endoderm-like	Rps18	36.6536	1.30643	4.01633e-294	3.38737e-291		Smim6	2.42399e-43	0.840438	42.6155		Rps27a	23.7374	1.48103e-124	3.6311e-122	0.577823
2	Arpc2	28.3037	1.39588	3.11253e-176	1.64069e-173		Endoderm-like	Emp3	36.4104	3.11834	2.91706e-290	2.36563e-287		C6	1.74017e-42	1.09729	41.7594		Fn1	23.6689	7.53564e-124	1.82631e-121	2.04842
2	Areg	28.0764	2.63012	1.90435e-173	9.79348e-171		Endoderm-like	Ldha	36.0612	1.59226	9.19133e-285	6.9214e-282		Arl6ip1	7.51108e-42	0.442108	41.1243		Rps15a	23.5954	4.29953e-123	1.03018e-120	0.651855
2	Ncl	28.0133	1.56753	1.11758e-172	5.61052e-170		Endoderm-like	Lmna	35.9168	2.12803	1.66804e-282	1.17236e-279		Slc43a2	2.37331e-41	1.0225	40.6246		Trf	23.529	2.05822e-122	4.87614e-120	1.44457
3	S100a11	37.7799	2.1405	0	0		Late gastric	Meg3	31.7009	3.50535	1.51048e-220	3.18486e-216		Exosc7	8.09875e-41	0.517327	40.0916		Rpl3	23.4377	1.76314e-121	4.13065e-119	0.681268
3	Gm12648	36.4846	5.96041	1.94582e-291	2.05138e-287		Late gastric	Rian	31.6221	3.448	1.83424e-219	1.93374e-215		Atp8a1	1.03494e-40	0.42741	39.9851		Pabpc1	23.3944	4.8706e-121	1.12853e-118	0.981512
3	Cd9	36.112	1.98533	1.47082e-285	1.03374e-281		Late gastric	Rpl17	30.1447	1.54171	1.25948e-199	8.85203e-196		Hp	3.2119e-39	0.68368	38.4932		Meg3	23.3502	1.37213e-120	3.1109e-118	1.53268
3	Bsg	33.622	1.90623	8.00438e-248	4.21931e-244		Late gastric	Rps29	28.7817	1.30032	3.63962e-182	1.91853e-178		Zdhhc3	2.11713e-37	0.591482	36.6743		Rpl35a	23.3176	2.93684e-120	6.58758e-118	0.617482
3	Clu	33.4774	2.67723	1.02789e-245	4.3346e-242		Late gastric	Tpi1	28.3264	2.05861	1.63318e-176	6.88713e-173		Prnp	6.09413e-37	0.584254	36.2151		Golm1	23.3154	3.09054e-120	6.85937e-118	1.15212
3	Ldha	33.2295	1.96888	4.03461e-242	1.41783e-238		Late gastric	Rps14	28.181	1.37021	9.98685e-175	3.50955e-171		Irx3	7.27039e-37	1.03988	36.1384		Rplp2	23.2949	4.99008e-120	1.096e-117	0.602797
3	Map1lc3b	33.0101	1.66557	5.81949e-239	1.75291e-235		Late gastric	Dhrs7	28.1721	2.72556	1.28682e-174	3.87609e-171		Lrmda	1.05564e-36	0.539885	35.9765		Ctla4	23.2746	8.02533e-120	1.74447e-117	0.812278
3	Cxcl17	32.7292	3.45581	6.01214e-235	1.58457e-231		Late gastric	St8sia6	27.5067	2.59357	1.45826e-166	3.84343e-163		Cldn18	1.62139e-36	0.472737	35.7901		Mif	23.2276	2.39571e-119	5.15445e-117	1.0585
3	Calm2	32.5534	1.47817	1.87715e-232	4.39774e-229		Late gastric	Clmn	27.0594	2.34186	2.95957e-161	6.9336e-158		Atp11a	1.05673e-34	0.408006	33.976		Ldha	23.1712	8.88228e-119	1.89175e-116	0.955376
3	Rpl41	32.4477	1.23684	5.8296e-231	1.22917e-227		Late gastric	Mif	26.8606	1.97875	6.34305e-159	1.33743e-155		Chia1	2.0529e-34	1.42498	33.6876		Aldoa	23.1346	2.07848e-118	4.38248e-116	0.880464
3	S100a13	32.222	2.03176	8.67953e-228	1.66371e-224		Late gastric	B830012L14Rik	26.2855	3.10532	2.80984e-152	5.38595e-149		Slc39a8	2.76624e-34	0.816553	33.5581		Rps29	23.0881	6.09041e-118	1.27145e-115	0.525225
3	Gng5	32.2143	1.55132	1.11371e-227	1.95687e-224		Late gastric	Cdkn2a	26.1127	2.3039	2.61327e-150	4.59174e-147		Hacd3	6.57332e-34	0.896176	33.1822		Rpl9	22.9913	5.69767e-117	1.1778e-114	0.638499
3	Fxyd3	31.8677	3.66879	7.47795e-223	1.21287e-219		Late gastric	Rps7	26.02	1.69329	2.93991e-149	4.7683e-146		Gm39094	6.60787e-34	1.44418	33.1799		Rps12	22.9057	4.08027e-116	8.35267e-114	0.590418
3	S100a6	31.8351	3.14231	2.11782e-222	3.18958e-219		Late gastric	Ncoa1	25.1477	1.838	1.49885e-139	2.25738e-136		Mecom	4.34051e-33	0.640209	32.3625		Id1	22.8601	1.15894e-115	2.34964e-113	1.41437
3	Gm10076	31.5806	1.26424	6.81103e-219	9.57404e-216		Late gastric	Rbm25	24.9246	1.49612	4.02903e-137	5.30951e-134		B2m	4.56804e-32	0.692706	31.3403		A2ml1	22.7913	5.59643e-115	1.12382e-112	1.99611
3	Lgals3	31.3828	2.66272	3.47648e-216	4.58135e-213		Late gastric	Gapdh	24.7086	1.55346	8.64378e-135	1.07208e-131		Itih4	4.62668e-32	1.25863	31.3347		Rpl23a	22.7691	9.27635e-115	1.84521e-112	0.682713
3	Rps2	31.3628	1.54167	6.50832e-216	8.07223e-213		Late gastric	AC149090.1	24.2539	1.52534	6.01415e-130	7.0449e-127		Rab27b	6.76833e-32	0.817622	31.1695		Rps9	22.7263	2.46169e-114	4.85091e-112	0.53022
3	Rps12	31.0694	1.27547	6.2437e-212	7.3138e-209		Late gastric	Yy1	23.9628	1.58917	6.79411e-127	7.53968e-124		Emb	2.81032e-31	0.656168	30.5512		Rps26	22.7175	3.00536e-114	5.86741e-112	0.657127
3	Rps26	30.9191	1.39675	6.60709e-210	7.33213e-207		Late gastric	Rad51b	23.8685	2.71741	6.51443e-126	6.86784e-123		Scp2	5.72085e-31	0.438048	30.2425		Hspe1	22.6995	4.52676e-114	8.75659e-112	0.914381
3	AU021092	30.769	2.72969	6.80633e-208	7.17557e-205		Late gastric	Ccdc88c	23.7529	2.33008	1.02531e-124	1.02946e-121		Snhg11	7.18048e-31	1.22392	30.1438		Ppp1r14b	22.4392	1.632e-111	3.10006e-109	1.1255
3	Emp3	30.6002	3.06234	1.21748e-205	1.22241e-202		Late gastric	Arhgap24	23.7006	2.41286	3.55379e-124	3.40599e-121		Socs2	4.28515e-30	0.562303	29.368		Rpl22	22.4333	1.8628e-111	3.48263e-109	0.615497
3	Nrn1	30.5438	2.90219	6.83847e-205	6.55405e-202		Late gastric	Tmem213	23.5396	2.43978	1.60542e-122	1.41043e-119		Icam1	6.29238e-30	0.588664	29.2012		Slc38a2	22.3995	3.97994e-111	7.36114e-109	1.01602
3	Emp1	30.2823	2.91013	1.96028e-201	1.79707e-198		Late gastric	Uba52	23.3667	1.17255	9.31456e-121	7.8559e-118		Oat	3.76322e-29	0.831456	28.4244		Cfap77	22.3342	1.71886e-110	3.12433e-108	1.0289
3	Atp6v0c	30.2398	1.50153	7.1069e-201	6.24371e-198		Late gastric	Snx6	23.3372	1.60986	1.85832e-120	1.50702e-117		Gphn	4.53131e-29	0.329439	28.3438		St13	22.3187	2.43119e-110	4.38134e-108	0.890225
3	Atp6v0e	30.1218	1.67149	2.5141e-199	2.12039e-196		Late gastric	Rpl7a	23.1964	1.27741	4.94839e-119	3.72631e-116		Chsy1	1.06049e-28	0.872559	27.9745		Cox7a2l	22.2745	6.53332e-110	1.1576e-107	0.85919
4	Tpi1	34.8503	2.19305	4.21814e-266	8.89395e-262		Mito-high	mt-Co3	27.9083	1.38035	2.11334e-171	1.48532e-167		Fam184a	1.07772e-28	1.80283	27.9675		Rpl36a	22.0841	4.4951e-108	7.89826e-106	0.716348
4	Rpl17	33.0553	1.4371	1.30334e-239	1.37405e-235		Mito-high	mt-Atp6	26.4229	1.29394	7.47989e-154	1.75237e-150		mt-Nd5	1.37435e-28	0.285854	27.8619		Eef1g	22.0642	6.97286e-108	1.21506e-105	0.828358
4	Yy1	32.6517	1.92102	7.581e-234	5.32818e-230		Mito-high	mt-Co2	26.1097	1.31793	2.82805e-150	5.42086e-147		Adgrf5	1.47704e-28	0.423242	27.8306		Rps21	21.9795	4.52291e-107	7.81684e-105	0.572729
4	Rps14	31.8293	1.32444	2.54726e-222	1.34273e-218		Mito-high	mt-Nd1	25.9872	1.31941	6.9086e-149	1.2139e-145		Pfkfb2	3.62093e-28	0.951761	27.4412		Rpl5	21.8798	4.04411e-106	6.93253e-104	0.687023
4	Rps7	31.8127	1.7469	4.3241e-222	1.82347e-218		Mito-high	mt-Co1	25.8409	1.26352	3.08248e-147	4.99955e-144		Wfdc2	4.63466e-28	0.233006	27.334		Adgrl2	21.7299	1.06979e-104	1.80452e-102	1.17757
4	Cdkn2a	31.6649	2.42966	4.72302e-220	1.65975e-216		Mito-high	Gm42418	24.2932	1.87302	2.31537e-130	1.62732e-127		Lamp2	8.9349e-28	0.421557	27.0489		Rps13	21.6611	4.77811e-104	7.99576e-102	0.603086
4	Meg3	31.5316	2.95626	3.20494e-218	9.65373e-215		Mito-high	mt-Cytb	23.6449	1.15957	1.33263e-123	6.10839e-121		Fgfr2	5.04544e-27	0.358298	26.2971		Rpl22l1	21.6483	6.30964e-104	1.04755e-101	0.925809
4	Rian	30.7005	2.88456	5.60204e-207	1.31243e-203		Mito-high	mt-Nd4	22.0603	1.08698	7.60259e-108	2.39255e-105		Sfta2	6.47865e-27	0.342729	26.1885		Rpl9-ps6	21.6252	1.04066e-103	1.71425e-101	0.678534
4	Hsp90aa1	30.4266	1.80887	2.44433e-203	4.68533e-200		Mito-high	Malat1	21.5836	1.33992	2.56296e-103	6.92822e-101		Phldb2	1.36903e-26	0.294396	25.8636		Rpl27	21.4884	1.99979e-102	3.24351e-100	0.599175
4	Mif	30.1087	1.878	3.72461e-199	6.54444e-196		Mito-high	mt-Nd2	20.7617	1.04211	9.60684e-96	2.04606e-93		Idi1	1.68827e-26	1.19071	25.7726		Zfas1	21.4316	6.77719e-102	1.09082e-99	1.25032
4	Gapdh	29.9238	1.61374	9.66063e-197	1.56688e-193		Mito-high	Cmss1	18.7943	1.38671	8.40132e-79	1.04818e-76		S100g	2.36627e-26	0.526856	25.6259		Nup210l	21.3845	1.86092e-101	2.97254e-99	1.04325
4	Rbm25	29.4786	1.52083	5.41857e-191	7.61671e-188		Mito-high	Gphn	18.7175	1.41613	3.56368e-78	4.26933e-76		Ror1	3.13569e-26	0.81949	25.5037		Cd2ap	21.3755	2.26109e-101	3.58459e-99	0.955445
4	Arhgap5	29.1755	1.66413	3.97281e-187	5.23542e-184		Mito-high	Srrm2	18.4221	0.9035	8.74231e-76	9.75299e-74		Cox6a2	3.14456e-26	0.880935	25.5024		Vmp1	21.365	2.82775e-101	4.44949e-99	0.619588
4	Snx6	28.8052	1.71023	1.8451e-182	2.28847e-179		Mito-high	Camk1d	18.1374	1.92284	1.61351e-73	1.6842e-71		Cacna1c	7.06042e-26	0.710909	25.1512		Epha4	21.3245	6.7255e-101	1.05042e-98	1.62889
4	Papola	27.5084	1.64487	1.39261e-166	1.46816e-163		Mito-high	Magi1	17.8333	1.41492	3.89538e-71	3.71647e-69		Secisbp2l	7.37493e-26	0.483979	25.1322		Slc4a4	21.3238	6.8341e-101	1.05954e-98	1.1379
4	Rab10	27.3163	1.52231	2.71903e-164	2.73004e-161		Mito-high	mt-Nd5	17.7978	1.00703	7.34749e-71	6.94717e-69		Pi4k2b	1.02607e-25	0.392993	24.9888		Rplp1	21.2776	1.83271e-100	2.82064e-98	0.485706
4	Btbd7	27.176	1.58356	1.24699e-162	1.19513e-159		Mito-high	Lars2	16.8854	2.19294	5.76234e-64	4.80233e-62		Acot7	1.06311e-25	0.865232	24.9734		Zfp704	21.2387	4.18891e-100	6.40023e-98	0.97315
4	St8sia6	27.0706	2.21839	2.18643e-161	2.00438e-158		Mito-high	Mbnl2	15.7211	0.957669	1.08438e-55	7.25847e-54		Tfcp2l1	1.39396e-25	0.680198	24.8557		Clic1	21.0493	2.32269e-98	3.5233e-96	0.801561
4	Clmn	26.6557	2.02782	1.53795e-156	1.29711e-153		Mito-high	Ano1	15.6837	1.92009	1.95575e-55	1.30497e-53		Tmem164	1.52058e-25	0.486664	24.818		Pfdn1	21.0068	5.68226e-98	8.55788e-96	0.796538
4	Rps15	26.5425	1.00951	3.13771e-155	2.45032e-152		Mito-high	Neat1	15.5791	1.34641	1.009e-54	6.62765e-53		Tmem132d	3.93123e-25	2.26843	24.4055		Nudcd3	20.875	9.04024e-97	1.34235e-94	0.658772
4	Trip11	26.4036	1.56208	1.24428e-153	9.3699e-151		Mito-high	Gm26917	14.705	2.26149	5.98412e-49	3.34682e-47		Acaca	4.7105e-25	0.548003	24.3269		Dynll1	20.7644	9.08635e-96	1.33976e-93	0.747751
4	Cfap77	26.3612	1.62119	3.81676e-153	2.77505e-150		Mito-high	AC149090.1	14.654	1.14804	1.26932e-48	7.06163e-47		Cpeb3	4.45298e-24	0.939238	23.3513		1110038B12Rik	20.7619	9.56299e-96	1.40025e-93	1.41877
4	Rps29	26.3512	1.02249	4.97261e-153	3.49492e-150		Mito-high	mt-Nd4l	14.3179	0.874047	1.69106e-46	8.95881e-45		Car8	1.2679e-23	0.461484	22.8969		Eno1	20.7135	2.61933e-95	3.80886e-93	1.28704
4	Acp1	26.3155	1.8244	1.27553e-152	8.67565e-150		Mito-high	mt-Nd3	14.0069	0.863908	1.41496e-44	7.00337e-43		Nebl	1.41831e-23	0.762914	22.8482		Cstb	20.62	1.81626e-94	2.623e-92	0.899167
4	Asxl2	26.2666	1.70222	4.61472e-152	3.04067e-149		Mito-high	Sfta3-ps	13.8984	0.919096	6.48156e-44	3.14169e-42		Galnt18	1.85739e-23	1.07963	22.7311		Krt8	20.5627	5.92458e-94	8.49794e-92	1.01252
5	mt-Nd2	36.4813	1.67705	2.19879e-291	1.15904e-287		Ribo-high	Rps24	14.6018	0.934909	2.73674e-48	6.63266e-46		Oaz2	8.26141e-23	0.722112	22.0829		Gng5	20.5455	8.44513e-94	1.20315e-91	0.722977
5	Ank3	35.9489	2.55645	5.257e-283	1.38555e-279		Ribo-high	Rpl37	14.3657	0.804737	8.49214e-47	1.7217e-44		Macf1	1.01275e-22	0.397486	21.9945		Rpl41	20.4838	3.00099e-93	4.2467e-91	0.507297
5	mt-Nd4	35.6638	1.48344	1.43768e-278	2.75577e-275		Ribo-high	Gm42418	12.7636	1.25431	2.61861e-37	1.88441e-35		Atp1b1	1.0965e-22	0.273061	21.96		Pkm	20.36	3.78524e-92	5.32079e-90	0.962364
5	mt-Cytb	35.4697	1.51479	1.44163e-275	2.33821e-272		Ribo-high	Rpl23	12.4124	0.62151	2.23802e-35	1.356e-33		Atp6v1c2	1.10074e-22	0.612645	21.9583		Rpl14	20.278	2.01251e-91	2.79169e-89	0.587511
5	mt-Atp6	33.2692	1.29475	1.07684e-242	5.04559e-240		Ribo-high	Rpl32	12.2834	0.816488	1.11213e-34	6.38943e-33		Ddhd1	1.22799e-22	0.855229	21.9108		Tmsb10	20.2679	2.46884e-91	3.40232e-89	1.02669
5	mt-Co3	32.8138	1.25554	3.74227e-236	1.48879e-233		Ribo-high	Rps10	12.1652	0.643253	4.76242e-34	2.56817e-32		Atrx	1.35728e-22	0.274618	21.8673		Naca	20.2451	3.92586e-91	5.37511e-89	0.589696
5	mt-Nd5	32.073	1.56792	1.05011e-225	3.40639e-223		Ribo-high	Rps29	11.745	0.563987	7.48894e-32	3.37402e-30		Adam19	3.65377e-22	0.539972	21.4373		Gstm1	20.2279	5.56223e-91	7.56642e-89	1.4021
5	mt-Co2	30.6601	1.18841	1.93658e-206	5.1687e-204		Ribo-high	Rps28	11.7156	0.609618	1.06025e-31	4.70639e-30		C3	3.67318e-22	0.858234	21.435		Nme2	20.2095	8.07864e-91	1.09191e-88	0.672557
5	Mecom	30.3458	2.34912	2.85328e-202	7.07781e-200		Ribo-high	Rpl38	11.109	0.436062	1.13386e-28	3.88107e-27		Birc3	5.13977e-22	1.03771	21.2891		Pgam1	20.1785	1.51384e-90	2.03307e-88	1.23145
5	mt-Co1	29.6848	1.08363	1.20808e-193	2.73896e-191		Ribo-high	Rps21	11.0401	0.560486	2.44821e-28	8.12922e-27		Ager	6.73369e-22	0.418871	21.1717		S100a6	20.1536	2.50456e-90	3.34232e-88	1.37686
5	Malat1	29.6371	1.27251	4.96603e-193	1.11392e-190		Ribo-high	Rps20	10.6147	0.530174	2.54632e-26	6.82201e-25		Aplp2	1.05686e-21	0.362416	20.976		Hsph1	20.0265	3.23473e-89	4.26276e-87	1.43401
5	Hc	29.5943	3.12243	1.76653e-192	3.92076e-190		Ribo-high	Rps14	10.4862	0.589761	9.99776e-26	2.57705e-24		H3f3b	1.32754e-21	0.160727	20.877		Hspd1	20.005	4.98087e-89	6.52308e-87	0.947622
5	mt-Nd1	29.0977	1.11171	3.8392e-186	8.09496e-184		Ribo-high	Rps7	10.2267	0.705383	1.50616e-24	3.51689e-23		Slc6a20a	2.90879e-21	1.60618	20.5363		Bmp4	19.9973	5.81588e-89	7.56962e-87	1.05355
5	Pde4d	28.3229	1.52754	1.80748e-176	3.52878e-174		Ribo-high	Rpl24	10.173	0.347304	2.61706e-24	6.0241e-23		Cecr2	6.21372e-21	1.57509	20.2066		Nsa2	19.8289	1.67559e-87	2.16747e-85	0.797753
5	Slc34a2	28.29	2.22362	4.58727e-176	8.87364e-174		Ribo-high	Fau	10.0303	0.434929	1.12161e-23	2.42555e-22		Zbtb16	7.0333e-21	1.5312	20.1528		Gm10076	19.7599	6.59785e-87	8.48266e-85	0.506699
5	Lrrk2	28.2025	2.11243	5.45551e-175	1.0363e-172		Ribo-high	Uba52	9.91533	0.499456	3.57072e-23	7.374e-22		Son	7.63598e-21	0.217575	20.1171		Tspan8	19.7581	6.83358e-87	8.73248e-85	0.87568
5	Nckap5	28.1138	1.61514	6.63992e-174	1.25002e-171		Ribo-high	Rpl22	9.84379	0.398726	7.29126e-23	1.46975e-21		Ces1d	9.86521e-21	0.728421	20.0059		Serpinb6a	19.7438	9.06069e-87	1.15087e-84	0.969404
5	Alcam	27.8385	1.35851	1.48299e-170	2.71902e-168		Ribo-high	Rpl39	9.77083	0.478939	1.50214e-22	2.93536e-21		Brd7	1.29191e-20	0.326413	19.8888		Slc39a10	19.696	2.3318e-86	2.94407e-84	1.36274
5	mt-Nd4l	26.7706	1.40866	7.10799e-158	1.20864e-155		Ribo-high	Rpl37a	9.68329	0.395489	3.55097e-22	6.715e-21		Nckap5	1.45166e-20	0.362417	19.8381		Hdgf	19.631	8.40876e-86	1.04911e-83	0.822964
5	Gm42418	26.7686	1.59309	7.49757e-158	1.26469e-155		Ribo-high	Rpl28	9.60667	0.449183	7.49359e-22	1.37873e-20		Prmt8	1.47947e-20	1.14457	19.8299		Areg	19.6023	1.47655e-85	1.83136e-83	1.38985
5	Atp8a1	26.4202	1.45825	8.03229e-154	1.28304e-151		Ribo-high	Rps3a1	9.58606	0.382826	9.15155e-22	1.67355e-20		Gm31641	2.41904e-20	1.37183	19.6164		Rps6	19.5918	1.81635e-85	2.23964e-83	0.630666
5	Nrp1	25.0201	2.04706	3.69531e-138	5.12603e-136		Ribo-high	Rps11	9.51712	0.386329	1.7805e-21	3.19233e-20		Cpm	2.53291e-20	0.561162	19.5964		Rps4x	19.5258	6.62672e-85	8.12351e-83	0.556219
5	Ppp1r14c	24.826	1.98277	4.69834e-136	6.39126e-134		Ribo-high	Rps3	9.49974	0.428041	2.10416e-21	3.7535e-20		Epas1	2.74474e-20	0.490525	19.5615		S100a14	19.4071	6.72768e-84	8.19961e-82	1.3932
5	Abca3	24.7976	1.46623	9.51784e-136	1.26216e-133		Ribo-high	Rps27a	9.14466	0.316479	5.98165e-20	9.46159e-19		Gm20275	4.79292e-20	1.00193	19.3194		Eif4b	19.3833	1.06703e-83	1.293e-81	0.951722
5	Lrmda	24.7785	1.70207	1.52857e-135	2.01437e-133		Ribo-high	Rpl26	9.01221	0.29592	2.01941e-19	3.03487e-18		Ctnnb1	8.6284e-20	0.264613	19.0641		Atpif1	19.3618	1.62145e-83	1.95362e-81	0.635847
6	Ros1	23.8417	2.15836	1.23366e-125	2.60118e-121		AT1-like	Ager	23.9104	3.19919	2.38744e-126	5.03391e-122		Rnase4	2.55619e-19	0.428279	18.5924		Lgals3	19.3329	2.8404e-83	3.40284e-81	1.36563
6	Meg3	22.2359	2.22517	1.54596e-109	1.62983e-105		AT1-like	Clic5	19.1127	3.4234	1.9786e-81	2.08594e-77		Trpm6	3.1344e-19	0.692427	18.5038		Igf1r	19.3211	3.57185e-83	4.25494e-81	1.31275
6	Cald1	22.0333	1.74426	1.38218e-107	9.71444e-104		AT1-like	Aqp5	19.0623	2.29243	5.19241e-81	3.6494e-77		Arhgap31	3.37113e-19	0.605901	18.4722		Cct3	19.3087	4.54255e-83	5.38088e-81	0.920417
6	Gkn2	21.5281	2.99204	8.49261e-103	4.47667e-99		AT1-like	Igfbp7	18.2518	2.20345	2.00088e-74	1.05472e-70		Clip4	3.71203e-19	0.754368	18.4304		Wdr89	19.2674	1.0096e-82	1.18924e-80	0.640085
6	Dock4	21.3965	1.55443	1.44162e-101	6.07931e-98		AT1-like	Clic3	17.9041	2.76366	1.09486e-71	4.61701e-68		Fth1	4.88215e-19	0.219129	18.3114		Kcnk2	19.1954	4.04337e-82	4.71019e-80	1.07723
6	Stk39	19.8205	1.44382	1.98303e-87	6.96871e-84		AT1-like	Cldn18	17.8325	2.25369	3.95158e-71	1.38865e-67		Nupr1	9.37899e-19	0.417904	18.0278		2200002D01Rik	19.0978	2.6328e-81	3.03348e-79	1.05909
6	Rian	19.5884	1.85059	1.94045e-85	5.84491e-82		AT1-like	Hs2st1	17.8139	2.56065	5.51767e-71	1.662e-67		Ncoa7	1.62166e-18	0.790316	17.79		Eef1d	19.0456	7.1499e-81	8.19324e-79	0.70233
6	Foxp1	19.1245	0.934576	1.57901e-81	4.16168e-78		AT1-like	Vamp8	17.7162	1.5163	3.14361e-70	8.28538e-67		Nectin1	2.10267e-18	0.99847	17.6772		Eef2	19.0173	1.22564e-80	1.3969e-78	0.615932
6	Spred1	17.9506	1.15187	4.74616e-72	1.00073e-68		AT1-like	Hopx	17.5315	4.13167	8.24175e-69	1.93086e-65		Arhgef38	8.91178e-18	0.393073	17.05		Rictor	18.8966	1.21579e-79	1.37822e-77	0.884434
6	Arhgap6	17.7722	1.76817	1.15989e-70	2.22331e-67		AT1-like	Msn	16.8348	2.28741	1.35644e-63	2.80591e-60		Atp13a3	9.37055e-18	0.404844	17.0282		Bgn	18.6937	5.57577e-78	6.22037e-76	2.4522
6	Elmo1	17.7428	1.78403	1.95914e-70	3.44238e-67		AT1-like	Akap5	16.8303	4.1324	1.46384e-63	2.80591e-60		Pde4d	1.19336e-17	0.269712	16.9232		Pam	18.6833	6.76895e-78	7.51176e-76	0.959279
6	Las1l	17.5863	1.43949	3.13733e-69	5.08852e-66		AT1-like	S100a11	16.4892	1.62117	4.38822e-61	7.71047e-58		Ly6i	2.07538e-17	2.77068	16.6829		Hsp90aa1	18.6765	7.69391e-78	8.49351e-76	0.744626
6	Magi1	17.2954	1.07465	5.09792e-67	7.67783e-64		AT1-like	Emp2	16.4348	2.04918	1.0783e-60	1.74893e-57		Dbi	3.77627e-17	0.240714	16.4229		Fkbp1a	18.6695	8.75905e-78	9.61898e-76	0.788568
6	Cdkn2a	17.2001	1.44651	2.65164e-66	3.72733e-63		AT1-like	Ahnak	16.4203	2.16488	1.36911e-60	2.06198e-57		Malat1	4.55161e-17	0.227926	16.3418		Eif3h	18.5752	5.10592e-77	5.5494e-75	0.751518
6	Id2	17.1669	1.32731	4.69667e-66	6.18933e-63		AT1-like	Nebl	16.2751	2.62221	1.48331e-59	2.08504e-56		Pdzk1ip1	4.90227e-17	1.01234	16.3096		Epcam	18.547	8.61517e-77	9.31543e-75	0.700299
6	Slc35f1	16.7974	2.37765	2.55032e-63	3.16315e-60		AT1-like	Sparc	15.9172	2.03201	4.81258e-57	6.34208e-54		Tmsb4x	4.96243e-17	0.235172	16.3043		Esd	18.3818	1.83884e-75	1.96812e-73	0.882696
6	Gpc6	16.7737	2.18769	3.80076e-63	4.45217e-60		AT1-like	Crip2	15.8896	1.65004	7.47836e-57	9.27537e-54		Irx2	5.52648e-17	1.11136	16.2576		Prdx1	18.3468	3.50277e-75	3.73009e-73	0.544085
6	Arhgap24	16.7408	1.67191	6.60948e-63	7.33478e-60		AT1-like	Magi3	15.8025	1.80533	2.99058e-56	3.50313e-53		Tinag	5.69131e-17	1.07179	16.2448		Rian	18.3025	7.9099e-75	8.38092e-73	1.33263
6	Rpl32	16.672	0.864525	2.09342e-62	2.20699e-59		AT1-like	Col4a4	15.7771	2.8523	4.47165e-56	4.96236e-53		Ldlr	5.98574e-17	0.9932	16.2229		Cdkn2a	18.2551	1.88496e-74	1.98722e-72	1.15766
6	Dpp4	16.6654	1.12403	2.34071e-62	2.35019e-59		AT1-like	Malat1	15.6987	1.23777	1.54304e-55	1.62675e-52		Retnla	8.04919e-17	1.76387	16.0942		Glud1	18.1661	9.58305e-74	1.00029e-71	0.886412
6	Col18a1	16.6353	1.76073	3.86654e-62	3.70573e-59		AT1-like	Qk	15.6893	1.86103	1.79019e-55	1.79743e-52		Stat3	8.77878e-17	0.536218	16.0566		Rpl29	18.0365	1.00654e-72	1.04547e-70	0.559546
6	Mir99ahg	16.5676	1.30224	1.19585e-61	1.09628e-58		AT1-like	Bcam	15.417	1.83718	1.25779e-53	1.20548e-50		Ablim1	1.44522e-16	0.81736	15.8401		Epb41l4aos	18.0089	1.65985e-72	1.71559e-70	1.25416
6	Parm1	16.4844	1.58648	4.74789e-61	4.00437e-58		AT1-like	Tmsb4x	15.0288	1.16735	4.75392e-51	4.3581e-48		Npc1	1.29655e-15	0.696905	14.8872		Snhg1	17.8928	1.34263e-71	1.37424e-69	1.12004
6	Tmsb10	16.3997	1.29793	1.92133e-60	1.55812e-57		AT1-like	Cryab	14.8926	3.11332	3.68135e-50	3.23422e-47		Muc1	1.39356e-15	0.304286	14.8559		Sars	17.8309	4.06834e-71	4.14401e-69	0.842909
6	Adamts9	16.2703	1.59233	1.60489e-59	1.2533e-56		AT1-like	Cd81	14.8838	1.57885	4.19992e-50	3.54221e-47		Aox3	2.19996e-15	0.356477	14.6576		Krt19	17.7874	8.85181e-71	8.9731e-69	1.08109
7	mt-Co3	28.758	1.35963	7.19082e-182	5.05395e-178		High plasticity cell state	Hsp90aa1	22.7906	2.57846	5.68134e-115	1.19791e-110		mt-Nd2	3.01057e-15	0.191382	14.5214		Tsc22d1	17.7357	2.22408e-70	2.23308e-68	0.77031
7	mt-Atp6	27.6181	1.30733	6.74179e-168	1.77688e-164		High plasticity cell state	Yy1	21.2043	2.31761	8.71461e-100	9.18738e-96		Tmprss4	3.27406e-15	1.06632	14.4849		Dnaja1	17.7267	2.60756e-70	2.60571e-68	0.622379
7	mt-Co2	27.3443	1.30592	1.26239e-164	2.9575e-161		High plasticity cell state	Syne2	20.3273	2.78953	7.38104e-92	3.11258e-88		Pcnt	5.72775e-15	0.578211	14.242		Krt7	17.7222	2.8266e-70	2.81127e-68	1.03974
7	mt-Co1	27.2162	1.27495	4.17253e-163	7.33149e-160		High plasticity cell state	Lgals3	20.1461	3.47515	2.91254e-90	1.02352e-86		H2-DMa	6.32335e-15	0.749255	14.1991		Hspa4l	17.6722	6.86247e-70	6.7932e-68	1.10221
7	mt-Nd1	26.4007	1.27112	1.34584e-153	1.23965e-150		High plasticity cell state	S100a14	20.0262	3.2903	3.25798e-89	9.81351e-86		Vamp8	9.53076e-15	0.190178	14.0209		Pcsk6	17.6634	8.02451e-70	7.90639e-68	1.6839
7	Gm42418	26.181	1.97738	4.37523e-151	3.41673e-148		High plasticity cell state	Eif5	19.6939	2.09252	2.43311e-86	6.41276e-83		Cftr	2.27583e-14	1.41724	13.6429		Kcnq1ot1	17.6421	1.17032e-69	1.14241e-67	0.919252
7	mt-Cytb	24.5026	1.1457	1.38686e-132	6.09206e-130		High plasticity cell state	Ctnna1	19.3248	1.69999	3.32437e-83	7.78825e-80		Acly	3.62783e-14	0.394445	13.4404		Set	17.6397	1.22204e-69	1.18741e-67	0.741392
7	mt-Nd4	23.4576	1.10735	1.10519e-121	3.64107e-119		High plasticity cell state	Calm1	19.2343	1.93585	1.90965e-82	4.0265e-79		mt-Cytb	7.48337e-14	0.196281	13.1259		Stambpl1	17.5996	2.48097e-69	2.39959e-67	1.06338
7	Malat1	21.9562	1.31172	7.56352e-107	1.66122e-104		High plasticity cell state	Arhgap5	18.9813	2.01682	2.43273e-80	4.66311e-77		Tspan11	1.01275e-13	0.355693	12.9945		Igfbp7	17.5961	2.63914e-69	2.54093e-67	0.824261
7	mt-Nd2	21.6228	1.04353	1.09634e-103	2.16041e-101		High plasticity cell state	Kif5b	18.8694	1.90067	2.03648e-79	3.30302e-76		Nav2	1.3774e-13	0.385205	12.8609		Aprt	17.4934	1.6089e-68	1.53501e-66	0.894585
7	Cmss1	20.1165	1.44809	5.29541e-90	6.68585e-88		High plasticity cell state	Nars	18.7518	2.31892	1.87046e-78	2.81273e-75		mt-Nd4	1.47031e-13	0.179795	12.8326		Snrpe	17.4686	2.48729e-68	2.36236e-66	0.770988
7	mt-Nd5	18.8623	1.00364	2.32678e-79	2.24019e-77		High plasticity cell state	Clic5	18.6624	3.35278	1.00171e-77	1.24242e-74		Dst	1.74001e-13	0.832673	12.7594		Prdx2	17.468	2.51101e-68	2.3742e-66	0.668856
7	Gphn	18.3637	1.36251	2.56731e-75	2.28404e-73		High plasticity cell state	Esyt2	18.6283	2.22833	1.8946e-77	2.21931e-74		Tmem50b	3.01533e-13	0.602494	12.5207		Rpl36al	17.3741	1.29663e-67	1.22051e-65	0.505494
7	Srrm2	18.2806	0.836329	1.18224e-74	1.04299e-72		High plasticity cell state	Cfl2	18.5677	2.35974	5.86919e-77	6.51326e-74		Car2	3.82968e-13	0.912953	12.4168		Myh7	17.3341	2.60187e-67	2.43824e-65	0.992998
7	Camk1d	18.1158	1.89507	2.38962e-73	1.99151e-71		High plasticity cell state	Tnfrsf12a	18.5169	2.88717	1.50905e-76	1.59091e-73		Mmp15	3.86258e-13	0.779684	12.4131		Pafah1b3	17.3271	2.93984e-67	2.74277e-65	0.876528
7	Magi1	17.3828	1.31356	1.11383e-67	8.09832e-66		High plasticity cell state	Tpi1	18.4238	2.13159	8.46042e-76	8.49467e-73		H2-Q7	4.16276e-13	0.994449	12.3806		Rrm2b	17.2888	5.71595e-67	5.30928e-65	0.599392
7	Lars2	17.134	2.19525	8.27743e-66	5.74111e-64		High plasticity cell state	Procr	18.3162	4.01302	6.14584e-75	5.89023e-72		Sftpb	4.83872e-13	0.0659734	12.3153		Rpl4	17.2589	9.59226e-67	8.87074e-65	0.563279
7	Neat1	15.8487	1.32645	1.43584e-56	8.07325e-55		High plasticity cell state	Pura	18.2206	1.83464	3.54272e-74	3.11243e-71		Dgkg	6.48326e-13	1.23064	12.1882		Pebp1	17.2517	1.08594e-66	9.9987e-65	0.759027
7	Gm26917	15.0207	2.27603	5.37338e-51	2.67843e-49		High plasticity cell state	Lmo7	18.1527	2.46942	1.2222e-73	1.03081e-70		Atp6v1a	7.1926e-13	0.423424	12.1431		Aimp1	17.2385	1.36605e-66	1.25232e-64	0.821633
7	Mbnl2	14.9324	0.87273	2.02721e-50	9.8488e-49		High plasticity cell state	Krt18	17.9	2.21686	1.18008e-71	9.21553e-69		Fut8	7.24702e-13	0.482038	12.1398		Rtn4	17.2116	2.17174e-66	1.9823e-64	0.815827
7	Ano1	14.3176	1.74105	1.69908e-46	7.40189e-45		High plasticity cell state	S100a6	17.5421	3.12849	6.83301e-69	5.1455e-66		Dag1	7.67725e-13	0.402165	12.1148		Fam32a	17.1913	3.08685e-66	2.80544e-64	0.944389
7	mt-Nd4l	14.267	0.838146	3.51305e-46	1.521e-44		High plasticity cell state	F3	17.3501	3.08709	1.96922e-67	1.43176e-64		Tmem116	2.39189e-12	0.74711	11.6213		Thbs1	17.0899	1.76368e-65	1.5892e-63	1.78779
7	AC149090.1	13.9065	1.07719	5.7829e-44	2.40973e-42		High plasticity cell state	Eno1	17.2956	2.31934	5.07626e-67	3.56776e-64		Mob3b	2.99655e-12	0.339934	11.5234		AC149090.1	17.0416	4.03638e-65	3.62158e-63	0.702342
7	mt-Nd3	13.6908	0.810344	1.15171e-42	4.60791e-41		High plasticity cell state	Rab10	17.2	1.7552	2.65669e-66	1.80698e-63		Atrnl1	3.25886e-12	0.386411	11.4869		Ubb	17.0391	4.21173e-65	3.7629e-63	0.405594
7	Sfta3-ps	13.5226	0.813064	1.15101e-41	4.51099e-40		High plasticity cell state	Ndnf	17.1778	3.23179	3.89655e-66	2.56746e-63		Tmem42	6.08627e-12	0.852067	11.2156		Myof	17.0151	6.34424e-65	5.64423e-63	0.783369
8	Ager	24.6609	2.93087	2.81491e-134	5.93524e-130		Early gastric	Ros1	13.3652	2.07448	9.66039e-41	2.03689e-36		Pmvk	7.74365e-12	0.639408	11.1111		Bnip3l	17.0094	6.99592e-65	6.19786e-63	0.721326
8	Clic5	20.071	3.26583	1.32277e-89	1.39453e-85		Early gastric	Meg3	12.9107	2.19624	3.9193e-38	4.13192e-34		H2-DMb1	7.78194e-12	0.592027	11.1089		Fam162a	16.9954	8.88457e-65	7.83812e-63	0.805688
8	Aqp5	19.6619	2.1645	4.5731e-86	3.21413e-82		Early gastric	Id2	11.819	1.51835	3.11476e-32	1.87642e-28		Adcy7	7.81757e-12	0.773215	11.1069		Stk39	16.9917	9.46671e-65	8.3169e-63	0.803618
8	Cldn18	19.5269	2.20608	6.49022e-85	3.42116e-81		Early gastric	Dock4	11.8077	1.48101	3.55972e-32	1.87642e-28		Pigr	1.06328e-11	1.9474	10.9734		Cnih4	16.9837	1.08463e-64	9.48943e-63	0.93007
8	Msn	18.4684	2.26173	3.70915e-76	1.56415e-72		Early gastric	Plxna4	10.8111	1.29811	3.04919e-27	1.28584e-23		Pfkfb4	1.11163e-11	0.737753	10.954		Nlrp4e	16.976	1.23558e-64	1.07654e-62	0.995087
8	Igfbp7	18.4095	2.04371	1.10233e-75	3.87379e-72		Early gastric	Brd7	10.5972	1.10536	3.0713e-26	1.07931e-22		Myo5c	1.22662e-11	0.345727	10.9113		Mgst3	16.967	1.44193e-64	1.25116e-62	1.11694
8	Clic3	18.3642	2.59245	2.54013e-75	7.65124e-72		Early gastric	Bex4	10.5004	1.89783	8.60472e-26	2.59187e-22		Selenos	1.45827e-11	0.279762	10.8362		Hist1h2bc	16.9536	1.81012e-64	1.5642e-62	1.21551
8	Emp2	18.0814	2.01625	4.46735e-73	1.17743e-69		Early gastric	Tceal9	9.93625	0.92531	2.89507e-23	7.63031e-20		Npnt	2.77887e-11	0.644663	10.5561		Sfxn1	16.9423	2.19366e-64	1.88789e-62	0.90466
8	S100a11	17.8689	1.59327	2.05901e-71	4.8238e-68		Early gastric	Sftpb	9.85417	0.808933	6.57556e-23	1.54051e-19		Ssbp2	3.40693e-11	0.734543	10.4676		Serf2	16.9318	2.62158e-64	2.24699e-62	0.495834
8	Hopx	17.6845	3.93065	5.52151e-70	1.16421e-66		Early gastric	Rian	9.80919	1.6784	1.02795e-22	2.16743e-19		Nedd4l	4.67341e-11	0.233805	10.3304		Cox4i1	16.9287	2.76407e-64	2.35953e-62	0.411175
8	Hs2st1	17.5607	2.3431	4.92309e-69	9.43667e-66		Early gastric	Kcnc3	9.61711	1.20435	6.77092e-22	1.29786e-18		Azin2	5.28081e-11	0.890284	10.2773		Pkhd1	16.8568	9.35599e-64	7.89084e-62	1.36507
8	Ahnak	17.4848	2.08314	1.87002e-68	3.28579e-65		Early gastric	Nrp1	9.57199	1.34078	1.0487e-21	1.84265e-18		Eps8	5.74949e-11	0.390495	10.2404		Tnfrsf12a	16.8553	9.59276e-64	8.0583e-62	1.18391
8	Vamp8	17.4198	1.34641	5.83854e-68	9.46966e-65		Early gastric	Nckap5	9.29013	0.970224	1.54101e-20	2.4994e-17		Tacc1	6.09065e-11	0.343835	10.2153		Ano1	16.8164	1.84934e-63	1.54124e-61	0.941204
8	Crip2	17.3315	1.62586	2.72282e-67	4.10076e-64		Early gastric	Elmo1	9.10314	1.62813	8.77591e-20	1.32172e-16		Dhrs3	7.02848e-11	0.501512	10.1531		Gpi1	16.6854	1.67452e-62	1.39005e-60	0.797659
8	Sparc	17.2254	1.99474	1.71321e-66	2.4082e-63		Early gastric	Tc2n	8.99967	1.06473	2.26397e-19	3.18239e-16		H2afj	8.59549e-11	0.152642	10.0657		Cct5	16.6039	6.53346e-62	5.40227e-60	0.774403
8	Akap5	17.2079	3.91047	2.31528e-66	3.0511e-63		Early gastric	Col18a1	8.96033	1.75006	3.23698e-19	4.26573e-16		Esam	9.02981e-11	0.872395	10.0443		Erp29	16.5937	7.73561e-62	6.37131e-60	0.727096
8	Nebl	16.562	2.46219	1.31207e-61	1.62735e-58		Early gastric	Tgoln1	8.89332	0.779117	5.9311e-19	7.35631e-16		Mlc1	9.37998e-11	0.801704	10.0278		Pgk1	16.5877	8.5596e-62	7.02253e-60	1.1155
8	Tmsb4x	16.5247	1.15863	2.43519e-61	2.85255e-58		Early gastric	Mt1	8.86945	1.36182	7.35057e-19	8.61038e-16		Prrg3	1.10285e-10	0.684707	9.95748		Sox4	16.5508	1.57952e-61	1.28093e-59	0.788937
8	Col4a4	16.3346	2.71876	5.59926e-60	6.2137e-57		Early gastric	Foxp2	8.76098	1.22554	1.93565e-18	2.14807e-15		Dcxr	3.13746e-10	0.380538	9.50342		Pfn1	16.5384	1.94024e-61	1.56145e-59	0.635733
8	Actb	16.1956	1.11093	5.4143e-59	5.54941e-56		Early gastric	Pde7b	8.71855	1.26269	2.81797e-18	2.97084e-15		Hdac9	4.35467e-10	0.701193	9.36104		Tanc1	16.4363	1.0515e-60	8.36637e-59	0.747359
8	Qk	16.1944	1.74771	5.52704e-59	5.54941e-56		Early gastric	Trf	8.65194	1.34418	5.06327e-18	5.08377e-15		Prps2	4.38578e-10	0.707958	9.35795		Tubb5	16.3826	2.54602e-60	2.01059e-58	0.797491
8	Malat1	16.1525	1.16115	1.09028e-58	1.04493e-55		Early gastric	Inpp4b	8.62786	1.44011	6.2509e-18	5.99092e-15		Cgnl1	4.451e-10	0.348544	9.35154		Slc16a12	16.3363	5.44513e-60	4.28398e-58	1.79329
8	Cryab	16.0651	3.05481	4.48092e-58	4.10784e-55		Early gastric	Atox1	8.61461	0.822633	7.01822e-18	6.43388e-15		Agmo	5.2906e-10	2.32689	9.2765		Fkbp4	16.3357	5.498e-60	4.30949e-58	0.638832
8	Krt7	15.946	2.00685	3.03594e-57	2.6672e-54		Early gastric	Rps29	8.5491	0.646931	1.24054e-17	1.08986e-14		Inpp4b	6.22344e-10	0.471454	9.20597		Cfl1	16.3054	9.0297e-60	7.05153e-58	0.686739
8	Bcam	15.8042	1.72233	2.91006e-56	2.45434e-53		Early gastric	Tmem213	8.53629	1.63502	1.38603e-17	1.16898e-14		Serpinb9	6.71546e-10	0.911789	9.17292		Lamc2	16.2926	1.11448e-59	8.6393e-58	0.885027
9	Rps24	17.5061	1.24516	1.28617e-68	3.81893e-65		Pre-EMT	Tff3	17.9509	9.79992	4.71753e-72	9.94692e-68		Clic3	6.85418e-10	0.521474	9.16404		Slc25a4	16.2919	1.12607e-59	8.69716e-58	0.703529
9	Rpl37	15.4742	0.95482	5.18032e-54	2.06089e-51		Pre-EMT	Galnt7	17.7267	5.10475	2.6077e-70	2.74916e-66		Gde1	8.51394e-10	0.284854	9.06987		Ptma	16.2705	1.59821e-59	1.22986e-57	0.378742
9	Rpl23	14.8118	0.923257	1.22922e-49	3.12267e-47		Pre-EMT	Tpd52	17.6433	3.41719	1.14563e-69	8.05186e-66		Sult1a1	1.13357e-09	1.58296	8.94555		Hspa9	16.2639	1.77915e-59	1.36412e-57	0.782042
9	Rps10	14.6299	0.935195	1.81075e-48	3.8364e-46		Pre-EMT	9030622O22Rik	17.5914	4.48976	2.86764e-69	1.51161e-65		Kctd8	1.18742e-09	1.27475	8.9254		Cacybp	16.2538	2.10033e-59	1.59875e-57	0.828455
9	Rpl32	14.5037	1.08261	1.14732e-47	2.17939e-45		Pre-EMT	Guca2a	17.1878	8.49899	3.27977e-66	1.38308e-62		Sdc4	1.29245e-09	0.11288	8.88859		Ddah1	16.2435	2.4845e-59	1.87762e-57	0.688424
9	Rps28	13.6555	0.840575	1.87181e-42	2.21726e-40		Pre-EMT	Sytl2	17.0449	4.39579	3.81587e-65	1.34096e-61		Tmem163	2.03627e-09	0.260524	8.69117		Gsr	16.2258	3.31187e-59	2.49395e-57	1.01557
9	Rpl38	13.5509	0.71845	7.82779e-42	8.68678e-40		Pre-EMT	Fcgbp	16.9486	9.42438	1.9702e-64	5.93452e-61		Phka1	2.2767e-09	0.793641	8.6427		Adamts9	16.1604	9.5971e-59	7.20124e-57	1.07791
9	Fau	13.2821	0.765211	2.94167e-40	2.89837e-38		Pre-EMT	Tnfaip8	16.7032	5.52416	1.24262e-62	3.27509e-59		Sh3pxd2a	3.24268e-09	1.08003	8.4891		Fmo2	16.1455	1.22139e-58	9.1e-57	1.7408
9	Rps29	13.0184	0.730973	9.61879e-39	8.48586e-37		Pre-EMT	Lgals4	16.6915	6.91004	1.51197e-62	3.5422e-59		Grb14	3.72324e-09	0.242037	8.42908		Eif4ebp1	16.0988	2.60264e-58	1.93228e-56	1.19429
9	Uba52	12.2851	0.79823	1.08932e-34	7.13304e-33		Pre-EMT	Ptprn2	16.3736	5.09797	2.95374e-60	6.22796e-57		Gnptab	4.52246e-09	0.392574	8.34463		Dnm3	16.0935	2.83371e-58	2.09645e-56	1.34365
9	Rps20	12.2647	0.700341	1.40073e-34	9.05961e-33		Pre-EMT	Kcnh7	16.0342	6.12474	7.3729e-58	1.41325e-54		Glul	4.9704e-09	0.782361	8.30361		Prrc2c	16.0613	4.76199e-58	3.51072e-56	0.591845
9	Rps21	12.2609	0.759177	1.46851e-34	9.41139e-33		Pre-EMT	Tox3	16.0264	4.21615	8.35806e-58	1.46858e-54		Fabp5	5.02322e-09	0.361543	8.29902		Snrpd1	16.0502	5.70212e-58	4.18917e-56	0.794357
9	Rpl39	12.1699	0.745177	4.49607e-34	2.7558e-32		Pre-EMT	Arhgap24	15.7654	4.00283	5.38506e-56	8.73416e-53		Cadps2	5.17421e-09	0.371171	8.28616		Eif5	16.0308	7.78677e-58	5.70083e-56	0.650675
9	Rpl24	12.0949	0.594308	1.12339e-33	6.52523e-32		Pre-EMT	Pdia5	15.6222	4.91537	5.14386e-55	7.74702e-52		Anpep	5.42026e-09	1.46959	8.26598		Foxq1	16.0213	9.06848e-58	6.61623e-56	1.44037
9	Rps11	12.007	0.654358	3.2656e-33	1.85094e-31		Pre-EMT	Fut8	15.5839	3.32563	9.36438e-55	1.31632e-51		Sod2	9.55919e-09	0.444123	8.01958		Stip1	16.0037	1.2043e-57	8.75607e-56	0.963278
9	Gm42418	11.9413	1.1103	7.20702e-33	3.99895e-31		Pre-EMT	Tspan13	15.4949	5.01591	3.75503e-54	4.94842e-51		Usp8	1.05548e-08	0.311059	7.97655		Ncl	15.9952	1.37924e-57	9.99354e-56	0.643172
9	Rpl37a	11.9364	0.689614	7.65064e-33	4.23396e-31		Pre-EMT	Prkca	15.4645	3.08585	6.02108e-54	7.05303e-51		Rsrp1	1.07053e-08	0.199003	7.9704		Ftl1	15.9751	1.90582e-57	1.37617e-55	0.458997
9	Rpl28	11.9281	0.734085	8.44839e-33	4.62687e-31		Pre-EMT	Fermt1	14.9467	3.74264	1.63731e-50	1.72614e-47		Ptgs1	1.24199e-08	0.373358	7.90588		Ros1	15.9242	4.30188e-57	3.09574e-55	1.18894
9	Rps14	11.8587	0.742055	1.93938e-32	1.02743e-30		Pre-EMT	Stard10	14.8271	2.26453	9.78786e-50	9.82748e-47		Scnn1a	1.31722e-08	0.643226	7.88034		Ddah2	15.9237	4.34019e-57	3.11268e-55	0.880358
9	Rps7	11.6462	0.899863	2.40058e-31	1.17987e-29		Pre-EMT	Bcas1	14.7189	7.62877	4.8786e-49	4.67569e-46		Clic4	1.43436e-08	0.446435	7.84334		Rpl10	15.8968	6.66494e-57	4.76374e-55	0.384725
9	Rps3	11.6054	0.718056	3.86952e-31	1.85009e-29		Pre-EMT	Lima1	14.4329	2.77289	3.21182e-47	2.9444e-44		AY036118	1.48512e-08	0.353142	7.82824		Airn	15.8965	6.69821e-57	4.77134e-55	0.720119
9	Rpl11	11.5323	0.523403	9.06949e-31	4.24956e-29		Pre-EMT	Slc12a8	14.4103	8.14588	4.45523e-47	3.91411e-44		Syt7	1.64581e-08	1.23515	7.78362		Vsig2	15.8958	6.776e-57	4.8105e-55	1.16899
9	Rps27a	11.3525	0.55532	7.20759e-30	3.10781e-28		Pre-EMT	Spink4	14.2652	7.7037	3.60361e-46	2.81416e-43		Selenop	1.82425e-08	0.203744	7.73891		Ctsd	15.8806	8.63804e-57	6.11185e-55	0.681823
9	Rpl22	11.3194	0.57811	1.05182e-29	4.47128e-28		Pre-EMT	5330417C22Rik	14.1384	3.11876	2.20294e-45	1.65889e-42		Dock9	1.99812e-08	0.241048	7.69938		Prelid1	15.8477	1.45752e-56	1.02782e-54	0.801167
9	Rps16	11.288	0.635542	1.50382e-29	6.31633e-28		Pre-EMT	Fxyd3	14.0832	4.04739	4.8149e-45	3.50076e-42		Dlc1	2.07375e-08	0.290914	7.68324		Kdm5b	15.83	1.93209e-56	1.35794e-54	0.810217
10	Retnla	21.6858	8.28264	2.79589e-104	5.89513e-100		Mesenchymal	Zeb1	10.1663	3.86244	2.80313e-24	5.91039e-20		Bri3	2.6425e-08	0.121941	7.57798		Rpl21	15.8207	2.24014e-56	1.56402e-54	0.336304
10	Slc26a4	20.2474	5.09821	3.74855e-91	3.95191e-87		Mesenchymal	Vim	10.0773	5.94561	6.96121e-24	7.33886e-20		Gsk3b	3.2184e-08	0.167539	7.49236		Pgrmc2	15.6799	2.0759e-55	1.43981e-53	0.869185
10	Chil1	19.5961	3.72014	1.66964e-85	1.17348e-81		Mesenchymal	Tgfb1	8.08998	2.72465	5.96744e-16	8.70292e-13		H2-Q6	3.75264e-08	1.11056	7.42566		Smyd3	15.6592	2.8765e-55	1.98856e-53	0.904277
10	Lcn2	19.0204	4.09652	1.15674e-80	6.09746e-77		Mesenchymal	Klf6	5.52845	1.52133	3.23067e-08	8.20706e-06		Serpinb6b	3.8512e-08	0.534794	7.4144		Tnfrsf21	15.6473	3.46609e-55	2.38832e-53	0.951234
10	C3	18.8209	3.59377	5.08728e-79	2.14531e-75		Mesenchymal	Esyt2	5.38498	0.940662	7.24511e-08	1.60476e-05		Prdx6	3.87844e-08	0.230528	7.41134		Tomm20	15.5339	2.04696e-54	1.40587e-52	0.72192
10	Sftpd	18.7409	2.45173	2.29728e-78	8.07301e-75		Mesenchymal	Tmsb10	5.26309	1.03565	1.41653e-07	2.89975e-05		Slc16a7	6.18753e-08	0.743984	7.20848		Rps27rt	15.53	2.17267e-54	1.48736e-52	0.500703
10	Fth1	18.2715	1.80376	1.39624e-74	4.20567e-71		Mesenchymal	Actb	5.0577	0.567213	4.24353e-07	7.84868e-05		Ddx6	7.41328e-08	0.181857	7.12999		Sh3d19	15.5273	2.26791e-54	1.54754e-52	0.552816
10	H2-Aa	17.7565	2.85619	1.53441e-70	4.04413e-67		Mesenchymal	Lgals3	5.01368	1.47878	5.33979e-07	9.54148e-05		Gab2	7.44117e-08	0.791871	7.12836		2810004N23Rik	15.4866	4.27407e-54	2.90706e-52	0.76309
10	H2-Ab1	17.2708	2.76113	7.80745e-67	1.82911e-63		Mesenchymal	Arhgap26	4.88572	1.5587	1.03051e-06	0.000167141		Npw	7.61028e-08	0.415585	7.1186		Bag2	15.4757	5.06166e-54	3.43168e-52	1.50123
10	Cd74	17.0787	2.47309	2.13826e-65	4.50853e-62		Mesenchymal	Zeb2	4.75561	6.90114	1.97845e-06	0.000291717		Prr15l	8.66283e-08	0.356118	7.06234		Orc5	15.4622	6.24562e-54	4.2208e-52	0.784783
10	Il33	16.3197	2.91521	7.14711e-60	1.28479e-56		Mesenchymal	Creb5	4.63743	2.62684	3.52762e-06	0.000499194		Myo9a	9.22092e-08	0.396301	7.03523		Elob	15.4157	1.2835e-53	8.62731e-52	0.540928
10	Sftpa1	16.3183	2.36685	7.31204e-60	1.28479e-56		Mesenchymal	Ankrd11	4.42145	0.571844	9.80425e-06	0.00114211		Steap2	1.07008e-07	1.30452	6.97058		Ran	15.4156	1.28479e-53	8.62731e-52	0.736212
10	H2-K1	16.0186	2.06367	9.47887e-58	1.5374e-54		Mesenchymal	Cmip	4.33629	0.772665	1.44907e-05	0.00155886		Tubb4b	1.09284e-07	0.205437	6.96144		Dnase2a	15.3955	1.75596e-53	1.17538e-51	0.777531
10	Lrg1	15.8576	3.0983	1.24467e-56	1.87457e-53		Mesenchymal	Gab2	4.12294	1.59461	3.74061e-05	0.00339089		Scamp1	1.21309e-07	0.404601	6.91611		Fhit	15.385	2.06362e-53	1.37694e-51	1.04736
10	Chia1	15.6022	4.09751	7.03063e-55	9.88272e-52		Mesenchymal	Lgals1	4.10747	2.10854	4.00016e-05	0.00358908		Mylk	1.36998e-07	0.441999	6.86328		H3f3a	15.3691	2.6369e-53	1.75391e-51	0.492339
10	Kcnj15	15.3777	2.7128	2.31027e-53	3.0445e-50		Mesenchymal	S100a6	4.10402	0.961649	4.06028e-05	0.00362759		Wwp1	1.46048e-07	0.289375	6.8355		Eif3f	15.3332	4.59143e-53	3.04435e-51	0.580508
10	H2-D1	15.0642	1.95416	2.7857e-51	3.45509e-48		Mesenchymal	Junb	4.0662	0.892729	4.77867e-05	0.00406283		Megf9	2.06373e-07	0.698534	6.68535		Ndrg1	15.3097	6.58583e-53	4.35305e-51	1.55705
10	B2m	14.2663	2.21434	3.54912e-46	4.1574e-43		Mesenchymal	Pdlim5	4.0364	0.93567	5.42768e-05	0.00448646		Dop1a	2.29378e-07	0.72694	6.63945		Pgap1	15.3057	6.99969e-53	4.61214e-51	1.33774
10	Fxyd4	13.9295	3.93285	4.19329e-44	4.65345e-41		Mesenchymal	Baz1a	4.02048	1.31116	5.80785e-05	0.00475377		mt-Nd4l	2.34569e-07	0.140154	6.62973		Hspb1	15.2946	8.30862e-53	5.45754e-51	1.06108
10	H2-Eb1	13.4671	2.04982	2.44245e-41	2.52121e-38		Mesenchymal	S100a10	4.01738	0.884484	5.88479e-05	0.00479077		Ldhb	2.36261e-07	0.39065	6.62661		Cers6	15.2843	9.7321e-53	6.37271e-51	1.21688
10	Itih4	13.4651	3.00033	2.51105e-41	2.52121e-38		Mesenchymal	Lcor	4.00249	0.817645	6.26801e-05	0.00496846		Gsap	2.73264e-07	0.215685	6.56342		Gadd45gip1	15.2576	1.46477e-52	9.56182e-51	0.769793
10	Sod2	13.4131	2.07539	5.06909e-41	4.85826e-38		Mesenchymal	Rassf1	3.99759	1.26272	6.39913e-05	0.00505339		Itm2b	2.82962e-07	0.130676	6.54827		Apob	15.2466	1.73326e-52	1.12449e-50	2.19687
10	Lyz2	13.2955	3.13769	2.45737e-40	2.25277e-37		Mesenchymal	Cd47	3.94241	0.767717	8.06678e-05	0.00618502		Errfi1	3.86243e-07	0.180946	6.41314		Uqcc2	15.1466	7.98479e-52	5.16439e-50	0.67238
10	Nkd1	13.0383	2.66695	7.41343e-39	6.51301e-36		Mesenchymal	Atp2b1	3.937	0.659102	8.25078e-05	0.00630318		Scd2	4.12169e-07	0.206911	6.38492		F3	15.1208	1.18011e-51	7.60937e-50	1.39568
10	Cox6c	12.9163	1.18538	3.64133e-38	2.95298e-35		Mesenchymal	Fosl2	3.90259	1.90378	9.51708e-05	0.00709073		H2-Q4	4.62632e-07	0.777353	6.33476		Rims1	15.1193	1.2088e-51	7.77057e-50	1.77706
11	Tff3	18.1992	9.82422	5.23671e-74	1.10416e-69									Nexmif	5.00249e-07	0.703795	6.30081		Parm1	15.1117	1.35618e-51	8.69148e-50	1.06466
11	Galnt7	17.9794	5.12661	2.82382e-72	2.97702e-68									Tnfrsf9	5.95575e-07	2.30652	6.22506		Aox1	15.1082	1.42942e-51	9.13315e-50	1.08245
11	Tpd52	17.8982	3.44122	1.21712e-71	8.55434e-68									Lifr	6.66026e-07	1.02025	6.17651		Cct6a	15.1065	1.46655e-51	9.34204e-50	0.718532
11	9030622O22Rik	17.8468	4.51347	3.06091e-71	1.61348e-67									Apc	6.9575e-07	0.162684	6.15755		Far1	15.0648	2.7602e-51	1.74771e-49	0.869261
11	Guca2a	17.4428	8.50555	3.90478e-68	1.64664e-64									Ccnd2	7.87262e-07	0.927723	6.10388		Efna5	15.0533	3.28368e-51	2.07295e-49	1.28539
11	Sytl2	17.3032	4.41386	4.44931e-67	1.56356e-63									Kcne2	7.88207e-07	1.02907	6.10336		Pgrmc1	15.0529	3.30397e-51	2.07953e-49	1.30801
11	Fcgbp	17.21	9.47868	2.23374e-66	6.72834e-63									Met	8.1154e-07	0.243626	6.09069		Spaca6	15.0493	3.48696e-51	2.18817e-49	1.20435
11	Tnfaip8	16.9614	5.53638	1.58468e-64	4.17661e-61									Pias1	8.46946e-07	0.403754	6.07214		Ubxn1	15.049	3.50321e-51	2.19184e-49	0.623092
11	Lgals4	16.79	6.93039	2.88959e-63	6.76966e-60									Msmo1	9.15597e-07	0.773527	6.0383		Cks1b	15.0017	7.15995e-51	4.4665e-49	1.44733
11	Ptprn2	16.6335	5.11828	3.98929e-62	8.41142e-59									Bcap29	9.54835e-07	0.69184	6.02007		Cct7	14.9951	7.90623e-51	4.91749e-49	0.668317
11	Kcnh7	16.3006	6.14752	9.77198e-60	1.87311e-56									Eif4a2	1.02927e-06	0.288483	5.98747		Akr1c19	14.9791	1.00504e-50	6.2327e-49	1.10109
11	Tox3	16.2688	4.21391	1.64234e-59	2.88573e-56									Dnajc3	1.07741e-06	0.219683	5.96762		Psma7	14.9609	1.32143e-50	8.1469e-49	0.571869
11	Arhgap24	16.0208	4.01994	9.15072e-58	1.48418e-54									Gpam	1.23377e-06	1.13138	5.90876		Las1l	14.9557	1.42871e-50	8.78259e-49	0.791234
11	Pdia5	15.9009	4.94719	6.24701e-57	9.40844e-54									Nfkb1	1.23896e-06	0.476188	5.90694		Eprs	14.949	1.58177e-50	9.69524e-49	0.715622
11	Fut8	15.8542	3.34545	1.31401e-56	1.84706e-53									Kcnq1	1.29113e-06	0.957712	5.88903		Gm8113	14.9141	2.66923e-50	1.62661e-48	2.01231
11	Tspan13	15.7676	5.02604	5.19783e-56	6.84976e-53									Ahcyl2	1.37624e-06	0.206103	5.8613		Rab25	14.9132	2.70534e-50	1.64386e-48	0.725933
11	Prkca	15.4928	3.0628	3.88237e-54	4.54777e-51									Fcer2a	1.49819e-06	1.89148	5.82443		Nhp2	14.8406	8.00301e-50	4.84895e-48	0.767319
11	Fermt1	15.2221	3.77321	2.52116e-52	2.79782e-49									Slc31a1	1.57598e-06	0.496608	5.80245		Mt1	14.8364	8.52039e-50	5.14763e-48	0.812351
11	Bcas1	15.0047	7.67717	6.83595e-51	6.86362e-48									Acat2	2.47914e-06	0.912698	5.6057		Sinhcaf	14.8266	9.85993e-50	5.9399e-48	0.810662
11	Stard10	14.842	2.24286	7.83771e-50	7.51173e-47									Hmgb2	2.70152e-06	0.308741	5.56839		Sugt1	14.8118	1.22879e-49	7.36051e-48	0.719968
11	Lima1	14.7084	2.79663	5.6913e-49	5.21744e-46									St6galnac2	3.45489e-06	1.07056	5.46157		Spred1	14.8054	1.35256e-49	8.07896e-48	0.657121
11	Slc12a8	14.7042	8.23821	6.05387e-49	5.31858e-46									Ddx3x	3.93767e-06	0.368058	5.40476		Cldn7	14.801	1.44285e-49	8.59394e-48	0.59576
11	5330417C22Rik	14.4205	3.14361	3.84655e-47	3.00387e-44									Cd36	3.98683e-06	0.153042	5.39937		Hsbp1	14.7756	2.10569e-49	1.24715e-47	0.619246
11	Spink4	14.3913	7.69109	5.86921e-47	4.41973e-44									5830428M24Rik	4.85069e-06	0.594369	5.3142		Nap1l1	14.7722	2.21271e-49	1.30686e-47	0.661113
11	Pdxdc1	14.279	2.75508	2.95897e-46	2.15137e-43									Fdps	4.92129e-06	0.467826	5.30792		Pgls	14.7078	5.74411e-49	3.36099e-47	0.626986
12	Mecom	13.0227	3.36938	9.08565e-39	1.91571e-34									Cntrl	5.00899e-06	0.626738	5.30025		Cox7c	14.7077	5.75442e-49	3.36099e-47	0.500336
12	Foxp2	11.9562	3.29451	6.02547e-33	6.35235e-29									Insig1	5.12001e-06	0.876538	5.29073		Sh3bgrl3	14.7006	6.38513e-49	3.71907e-47	0.652199
12	mt-Co2	11.5842	1.56637	4.95723e-31	2.09046e-27									Susd6	5.39639e-06	0.379511	5.2679		Crip1	14.6945	6.99547e-49	4.06335e-47	0.670964
12	mt-Nd1	11.525	1.56404	9.86624e-31	2.60037e-27									Nfix	5.40128e-06	0.235528	5.2675		Serbp1	14.6832	8.2643e-49	4.77405e-47	0.556073
12	Large1	11.4621	3.10836	2.04438e-30	4.31057e-27									Ddx5	5.55717e-06	0.0752174	5.25515		Eif2s2	14.6511	1.32568e-48	7.63715e-47	0.594746
12	mt-Co3	11.388	1.48947	4.79994e-30	9.20061e-27									Enpep	5.60236e-06	0.342098	5.25163		Ankrd37	14.6508	1.3317e-48	7.65091e-47	2.22198
12	Runx1	11.2356	2.79122	2.72788e-29	3.59483e-26									Mat2a	5.94501e-06	0.257369	5.22585		Apex1	14.6419	1.51782e-48	8.69653e-47	1.10565
12	Neat1	10.8481	2.29175	2.03588e-27	1.53309e-24									Sptbn1	6.35063e-06	0.12045	5.19718		Tcf7l2	14.6173	2.17912e-48	1.24517e-46	0.839048
12	mt-Cytb	10.7479	1.41526	6.0604e-27	4.25945e-24									Rragd	6.44964e-06	1.45227	5.19046		Phb2	14.6064	2.55827e-48	1.45787e-46	0.713658
12	Gm12648	10.3862	5.4092	2.86469e-25	1.31309e-22									Clstn1	6.78597e-06	0.508285	5.16839		Erh	14.6061	2.56772e-48	1.45931e-46	0.732867
12	Srrm2	10.3202	1.47983	5.70818e-25	2.45626e-22									Osmr	8.50811e-06	0.739949	5.07017		Cct2	14.5747	4.07011e-48	2.30076e-46	0.681104
12	mt-Co1	10.2389	1.14496	1.32723e-24	5.18235e-22									Slc24a4	8.70288e-06	0.463439	5.06034		Rab5if	14.5647	4.71051e-48	2.65565e-46	0.664915
12	mt-Atp6	10.1471	1.21905	3.41276e-24	1.1993e-21									Tfrc	1.0457e-05	0.331783	4.98059		9330188P03Rik	14.5608	4.98392e-48	2.80229e-46	1.07612
12	Luc7l2	9.94798	1.59182	2.57364e-23	8.09929e-21									Klhl29	1.23538e-05	0.799909	4.9082		Bcl2l1	14.5554	5.39376e-48	3.02466e-46	0.691965
12	Antxr1	9.82237	2.5601	9.01973e-23	2.53575e-20									Cachd1	1.25298e-05	0.771676	4.90206		Arhgef5	14.5328	7.50955e-48	4.18886e-46	0.730591
12	Ptprm	9.80968	1.79921	1.02293e-22	2.83795e-20									Phactr1	1.27777e-05	1.04501	4.89355		Snx6	14.5271	8.15572e-48	4.53729e-46	0.675311
12	9530026P05Rik	9.73981	2.31248	2.03934e-22	5.44296e-20									Tex15	1.3973e-05	0.764414	4.85471		Atp8b1	14.5108	1.0358e-47	5.74731e-46	0.774269
12	Ppp1r9a	9.64579	1.72947	5.1214e-22	1.31689e-19									Rprm	1.48582e-05	1.29388	4.82803		Eif4a1	14.4838	1.53308e-47	8.46202e-46	0.647658
12	Cadps2	9.49411	2.38121	2.22105e-21	5.5095e-19									Iah1	1.57516e-05	0.312641	4.80268		Rbm8a	14.4698	1.88096e-47	1.03551e-45	0.666668
12	Naaladl2	9.46229	2.77158	3.01277e-21	7.29124e-19									Sntb1	1.645e-05	0.264263	4.78383		Psmc6	14.4521	2.43272e-47	1.33578e-45	0.662176
12	mt-Nd4	9.27353	1.17097	1.80083e-20	3.83541e-18									Tgoln1	1.80161e-05	0.0827091	4.74434		Tpm4	14.4436	2.75103e-47	1.50664e-45	0.61522
12	Akap13	9.1804	1.55345	4.29509e-20	8.79243e-18									Matn4	1.86978e-05	0.494907	4.72821		Yy1	14.4302	3.33965e-47	1.82426e-45	0.649632
12	Selenbp1	9.16747	1.93987	4.84238e-20	9.81746e-18									AA986860	1.93144e-05	0.410873	4.71412		Pparg	14.424	3.6567e-47	1.99229e-45	1.2485
12	Ank3	9.14827	2.02332	5.78504e-20	1.15073e-17									Gramd2	2.01351e-05	0.796787	4.69605		Plpp2	14.4125	4.31793e-47	2.34648e-45	0.99487
12	Mbnl1	9.0577	1.81168	1.33235e-19	2.55388e-17									Gm26827	2.33945e-05	0.843434	4.63089		Adh5	14.3526	1.02638e-46	5.54903e-45	0.774281
														Limch1	2.54957e-05	0.407211	4.59353		Fam3c	14.3354	1.31426e-46	7.08727e-45	0.681109
														Gpt	2.634e-05	0.990921	4.57938		Nme1	14.3296	1.42977e-46	7.6905e-45	0.66502
														Tnfsf13	2.79357e-05	0.867128	4.55384		Ktn1	14.3282	1.45915e-46	7.82853e-45	0.645513
														Pip5k1b	3.71069e-05	0.109799	4.43055		Eif3m	14.32	1.64096e-46	8.78165e-45	0.682551
														Znrf3	3.86183e-05	0.510048	4.41321		Rps27	14.2866	2.65375e-46	1.41299e-44	0.361217
														Mtch1	4.28081e-05	0.132987	4.36847		Camk2d	14.2792	2.94875e-46	1.5661e-44	0.635628
														Scgb1c1	4.31244e-05	0.911519	4.36528		Aldh7a1	14.2758	3.09813e-46	1.64131e-44	1.08975
														Ppib	4.36739e-05	0.0864672	4.35978		Psmb1	14.2666	3.53192e-46	1.86643e-44	0.538272
														Hp1bp3	4.47954e-05	0.126177	4.34877		Srp19	14.2566	4.08047e-46	2.15092e-44	0.689915
														Cyp4v3	4.8231e-05	0.669143	4.31667		Rpp21	14.2351	5.54553e-46	2.9159e-44	0.721132
														Stimate	5.25609e-05	0.36465	4.27934		Pdap1	14.2264	6.28493e-46	3.29646e-44	0.613448
														Diaph2	5.28034e-05	0.368902	4.27734		Emp1	14.1884	1.08108e-45	5.65622e-44	1.71945
														Cobl	5.37692e-05	0.388514	4.26947		Serf1	14.1498	1.87173e-45	9.74454e-44	1.04941
														Aff1	5.49319e-05	0.284852	4.26018		Stmn1	14.1475	1.936e-45	1.00543e-43	0.722118
														Mdfic	5.74326e-05	0.25134	4.24084		Ybx1	14.1348	2.31763e-45	1.20067e-43	0.502902
														Cd200	6.26897e-05	0.332065	4.2028		Caprin1	14.105	3.53752e-45	1.82815e-43	0.650533
														Tmem176a	6.53736e-05	0.175631	4.1846		Tmeff2	14.0949	4.08181e-45	2.10428e-43	2.09986
														Cytip	7.39895e-05	0.684075	4.13083		Myo10	14.0536	7.31992e-45	3.7644e-43	0.830128
														Cd302	7.44259e-05	0.579346	4.12828		Hjurp	14.0479	7.94001e-45	4.07336e-43	1.2003
														Uhrf1bp1l	8.07615e-05	0.157028	4.0928		Abr	14.044	8.38985e-45	4.29369e-43	1.06036
														Gpx1	8.20702e-05	0.118288	4.08581		Mboat1	14.0069	1.41456e-44	7.18698e-43	1.0279
														Nedd9	8.32066e-05	0.36275	4.07984		Elmo1	13.9977	1.61045e-44	8.16258e-43	1.12892
														Atp6v1g1	8.43442e-05	0.0636262	4.07394		Slit2	13.9659	2.51638e-44	1.26933e-42	1.28103
														Tex11	8.65514e-05	2.14948	4.06273		Smad7	13.9468	3.29028e-44	1.65574e-42	0.934918
														Xdh	8.70733e-05	0.362441	4.06012		Eif3k	13.9441	3.41881e-44	1.71633e-42	0.522193
														Ehf	8.99615e-05	0.290239	4.04594		Rbpms	13.9313	4.08995e-44	2.04838e-42	0.553653
														Kiz	9.13844e-05	0.341375	4.03913		Ier2	13.9254	4.43842e-44	2.21763e-42	0.693804
														Cyb5b	0.000110577	0.215993	3.95633		Acp1	13.9214	4.69647e-44	2.34102e-42	0.720185
														Sec14l3	0.000124168	1.09625	3.90599		Akr1b8	13.8958	6.71232e-44	3.3301e-42	0.849294
														Gm6213	0.000125246	1.97891	3.90224		Txndc17	13.8613	1.08624e-43	5.37639e-42	0.608595
														Nktr	0.000132043	0.223458	3.87928		Nop58	13.8282	1.72371e-43	8.51157e-42	0.753068
														Fdx1	0.000136497	0.339666	3.86488		Ftl1-ps1	13.8106	2.2011e-43	1.08435e-41	0.595363
														Baiap2l1	0.000136907	0.140784	3.86358		Flnb	13.7953	2.71934e-43	1.33342e-41	0.850164
														Scarb2	0.000138651	0.228226	3.85808		Btf3	13.7812	3.30522e-43	1.61695e-41	0.49914
														Bach2	0.000139206	0.365841	3.85634		Kdm3a	13.7775	3.4805e-43	1.69876e-41	0.765547
														Rnaset2a	0.000152729	0.161362	3.81608		Psmb5	13.774	3.65207e-43	1.77838e-41	0.587905
														Gm9856	0.000161394	0.569443	3.79211		Itpr3	13.76	4.43253e-43	2.15345e-41	0.852986
														Lyz1	0.000170501	1.48488	3.76827		Tpm3	13.7454	5.42595e-43	2.63003e-41	0.507802
														Fgd6	0.000197899	0.427614	3.70356		Mdk	13.7262	7.07768e-43	3.42277e-41	2.57793
														Pxmp2	0.000223068	1.02306	3.65156		Hnrnpu	13.7172	8.00594e-43	3.86282e-41	0.527757
														Etnk1	0.000229832	0.257637	3.63859		Nras	13.702	9.87985e-43	4.75609e-41	0.801468
														Smim1	0.000235258	0.543933	3.62846		Cnot6	13.6977	1.04855e-42	5.03613e-41	0.562722
														Adamtsl1	0.000261092	1.08215	3.58321		Anp32b	13.6856	1.23807e-42	5.93288e-41	0.609723
														Cox6c	0.000273414	0.0577229	3.56318		Spint1	13.6807	1.32346e-42	6.32768e-41	0.714505
														Tnfaip1	0.000288782	0.306006	3.53943		Tcf4	13.6795	1.34676e-42	6.42455e-41	0.79105
														Alkal1	0.000291593	0.66838	3.53522		Anxa1	13.658	1.80814e-42	8.58663e-41	0.872749
														Spg21	0.000315729	0.421234	3.50069		2610307P16Rik	13.6499	2.02121e-42	9.57689e-41	1.16593
														Amotl2	0.000360857	0.724075	3.44266		Paics	13.6417	2.26367e-42	1.07017e-40	0.614425
														Psmb8	0.000367845	0.436322	3.43434		Myo1b	13.636	2.44731e-42	1.1544e-40	0.71458
														Herpud1	0.000371916	0.246815	3.42956		Kmt5a	13.635	2.47891e-42	1.16669e-40	0.662754
														Atp6v1b2	0.000381603	0.307359	3.41839		Cct4	13.6269	2.76985e-42	1.30072e-40	0.687049
														Gem	0.000391171	1.33043	3.40763		Mt2	13.6261	2.80209e-42	1.31294e-40	1.01148
														Phactr2	0.000420406	0.462676	3.37633		Ctsl	13.5995	4.03371e-42	1.88583e-40	0.743202
														Col4a4	0.000456261	0.423172	3.34079		Nars	13.5991	4.05407e-42	1.89115e-40	0.653506
														Add3	0.00049144	0.732447	3.30853		1700016D06Rik	13.5827	5.07084e-42	2.36024e-40	0.950031
														Lars2	0.000505373	0.17421	3.29639		Ctnna1	13.5773	5.4584e-42	2.53503e-40	0.517878
														Acaa1a	0.000540128	0.217067	3.2675		Ywhah	13.567	6.28423e-42	2.91215e-40	0.748219
														Efemp1	0.000573992	1.26819	3.24109		Siva1	13.5478	8.16252e-42	3.76601e-40	0.599075
														Mitf	0.000580121	0.406104	3.23648		Frg1	13.5392	9.17938e-42	4.22592e-40	0.660118
														Slc25a16	0.000668082	0.680056	3.17517		Hbegf	13.5188	1.2107e-41	5.56155e-40	0.988674
														Fam126b	0.000683055	0.437811	3.16554		Polr1d	13.5159	1.26008e-41	5.77585e-40	0.604339
														Tent5a	0.000705304	0.924163	3.15162		Basp1	13.5142	1.28875e-41	5.8944e-40	1.30059
														2025-03-03	0.000706151	0.661949	3.1511		Vps36	13.5054	1.45417e-41	6.63662e-40	0.607107
														Hivep3	0.000721312	0.784066	3.14188		Chchd2	13.4942	1.69193e-41	7.70505e-40	0.329135
														Dhcr24	0.000774027	0.985394	3.11124		Itga2	13.4914	1.75762e-41	7.98694e-40	1.13021
														Atp6v0b	0.000815046	0.0871874	3.08882		Jpt1	13.4894	1.8061e-41	8.1896e-40	0.770373
														Slc5a1	0.000885631	1.57256	3.05275		Arpc5l	13.4868	1.87069e-41	8.46428e-40	0.667677
														Bcam	0.000898613	0.165046	3.04643		Upf2	13.4846	1.9268e-41	8.69947e-40	0.661802
														Usp9x	0.000930612	0.10846	3.03123		Bzw1	13.4773	2.1281e-41	9.58781e-40	0.632921
														Sik3	0.000975681	0.286874	3.01069		Gls	13.4592	2.71912e-41	1.21984e-39	0.743122
														Cmtm8	0.000980328	0.11754	3.00863		2610035D17Rik	13.451	3.0384e-41	1.36018e-39	1.14203
														Soat1	0.000990293	0.12879	3.00424		Rps25	13.4425	3.40868e-41	1.52271e-39	0.389425
														Myo1d	0.00105937	0.14751	2.97495		Dusp6	13.4383	3.6081e-41	1.60839e-39	0.881046
														Grk5	0.00110126	0.711862	2.95811		Pfdn6	13.4244	4.35339e-41	1.93652e-39	0.649706
														Etfb	0.00119918	0.0722451	2.92112		Rtraf	13.4157	4.89397e-41	2.17241e-39	0.621411
														Gm13449	0.00123818	1.30225	2.90722		Txnl1	13.3652	9.6533e-41	4.26708e-39	0.632619
														Taok3	0.00126882	0.0588893	2.8966		Mrpl52	13.3577	1.06842e-40	4.70305e-39	0.499778
														Sgpp2	0.00127473	0.228591	2.89458		Numb	13.3565	1.08553e-40	4.76841e-39	0.686642
														Bmp1	0.00135367	0.217414	2.86849		Psap	13.3361	1.4267e-40	6.25406e-39	0.745001
														Slc16a2	0.00140873	0.590563	2.85117		Eif2s1	13.336	1.42986e-40	6.25488e-39	0.769293
														Slco3a1	0.00143029	0.677233	2.84458		Pabpn1	13.3355	1.43819e-40	6.2783e-39	0.577876
														Antxr1	0.0014522	0.181627	2.83797		Adssl1	13.3351	1.44724e-40	6.29689e-39	0.701743
														Tmtc2	0.00147603	0.300735	2.8309		Mpp6	13.335	1.44842e-40	6.29689e-39	0.7383
														Bex4	0.00148837	0.351657	2.82729		Pdlim5	13.3238	1.68323e-40	7.30265e-39	0.680491
														Cyp2b10	0.00155911	1.83825	2.80712		Atp6v0a1	13.3209	1.75049e-40	7.57886e-39	0.541606
														Adora2b	0.00180636	0.702521	2.7432		Hacd1	13.3201	1.76918e-40	7.64408e-39	1.08628
														Prkn	0.00197127	0.28301	2.70525		Med21	13.3069	2.11158e-40	9.10484e-39	0.735763
														Inka2	0.00197542	1.374	2.70434		Col18a1	13.3024	2.2402e-40	9.63971e-39	1.11249
														Afap1l1	0.00221995	0.512006	2.65366		Ergic1	13.2979	2.38033e-40	1.02218e-38	0.922309
														Txlng	0.00222287	0.290757	2.65308		Mrpl30	13.286	2.78967e-40	1.19553e-38	0.617849
														Ucp2	0.0022423	0.239162	2.64931		Btg1	13.2803	3.01236e-40	1.28835e-38	0.596333
														Slc10a6	0.00227358	1.48904	2.64329		Acsl3	13.2768	3.15598e-40	1.34704e-38	1.09557
														Dyrk2	0.00248538	0.610617	2.60461		Mrpl11	13.2756	3.20807e-40	1.36651e-38	0.892588
														Corin	0.00256665	1.60754	2.59063		Vasp	13.2753	3.21941e-40	1.36857e-38	0.726644
														Ppp1r1b	0.00267142	2.01185	2.57326		Atp6v0e	13.2663	3.63191e-40	1.54082e-38	0.581044
														Lpin2	0.0026764	0.0908499	2.57245		Etv1	13.2565	4.13832e-40	1.75214e-38	1.83237
														Fnbp1	0.00270858	0.647167	2.56726		Sfr1	13.2551	4.21601e-40	1.78145e-38	0.611745
														Pde7b	0.00280809	0.156603	2.55159		Itga6	13.2507	4.46973e-40	1.88488e-38	0.751595
														Anxa6	0.0029254	0.26881	2.53381		Lman1	13.2465	4.72551e-40	1.98877e-38	0.604689
														Msrb3	0.00303193	0.360413	2.51828		Asap2	13.2378	5.30661e-40	2.22888e-38	0.917073
														Slc6a14	0.00337471	0.845191	2.47176		Idh3b	13.2272	6.11387e-40	2.56284e-38	0.818618
														Ubr1	0.00337527	0.204239	2.47169		Eif3e	13.2198	6.74345e-40	2.82114e-38	0.58465
														Npr2	0.00343981	1.18666	2.46347		Actr3	13.2148	7.21184e-40	3.01112e-38	0.573797
														Sema4f	0.00344264	0.836043	2.46311		Ube2i	13.2113	7.54787e-40	3.14519e-38	0.515416
														Pcyt2	0.00352795	0.613995	2.45248		Eno1b	13.2012	8.63534e-40	3.59124e-38	1.18716
														Kcnj13	0.00354219	1.37923	2.45073		Tcp1	13.1974	9.07947e-40	3.76852e-38	0.594735
														Psmb9	0.00374609	0.718338	2.42642		Rtf2	13.1969	9.13814e-40	3.78541e-38	0.701634
														Sord	0.00394381	0.964811	2.40408		S100a11	13.1898	1.00451e-39	4.15296e-38	0.511553
														9230117E06Rik	0.00406106	2.40782	2.39136		Cd24a	13.1664	1.36906e-39	5.63933e-38	0.794368
														Lpp	0.0040692	0.0556521	2.39049		Hes1	13.1664	1.36938e-39	5.63933e-38	0.756048
														Pon3	0.00429331	0.172305	2.36721		Trir	13.1652	1.39131e-39	5.71849e-38	0.580824
														Mfsd2a	0.00451498	0.745017	2.34534		Tnks	13.1627	1.43822e-39	5.89977e-38	0.615443
														Fgd4	0.00456279	0.339849	2.34077		Gtf2h5	13.16	1.49165e-39	6.10706e-38	0.581816
														Rab9	0.00465879	0.366144	2.33173		Ugdh	13.1577	1.53662e-39	6.27898e-38	1.69866
														Braf	0.00466832	0.189169	2.33084		Polr2f	13.1471	1.76908e-39	7.21489e-38	0.565869
														2610028H24Rik	0.00480699	0.742564	2.31813		Rpl10-ps3	13.1311	2.185e-39	8.89396e-38	0.421216
														Myh14	0.00488103	0.149417	2.31149		Atp9a	13.0863	3.94255e-39	1.59863e-37	0.651389
														Cp	0.00499574	0.924744	2.3014		Ier3	13.0779	4.40287e-39	1.78185e-37	1.13595
														Ccser1	0.00515408	0.210001	2.28785		Prkca	13.0705	4.85647e-39	1.96166e-37	0.596897
														Prkaa2	0.00545503	0.906506	2.2632		Nedd8	13.0682	5.00616e-39	2.01826e-37	0.477553
														Cd55	0.00579238	0.462646	2.23714		Rad51b	13.0625	5.38923e-39	2.16855e-37	1.25736
														Fig4	0.0057996	0.786133	2.2366		Mrps21	13.056	5.87051e-39	2.35771e-37	0.578511
														Sh3rf3	0.00605145	0.86725	2.21814		Lmna	13.0292	8.34883e-39	3.34241e-37	0.785997
														Akap7	0.00609651	0.410825	2.21492		Atp5c1	13.0291	8.35404e-39	3.34241e-37	0.538971
														Txnrd3	0.00611253	0.584229	2.21378		Gclm	13.0284	8.43555e-39	3.36863e-37	0.801619
														Cog5	0.0067899	0.275379	2.16814		Mfge8	13.0091	1.08614e-38	4.32918e-37	1.12597
														Ggt5	0.00705735	0.663991	2.15136		Pfdn2	12.9792	1.60588e-38	6.38867e-37	0.579426
														Gm16685	0.00720852	0.777515	2.14215		Hdlbp	12.9598	2.06726e-38	8.2087e-37	0.529928
														Tmem59	0.00777354	0.0486776	2.10938		Gnl3	12.9558	2.17837e-38	8.63363e-37	0.832629
														Rab6b	0.00778235	1.00155	2.10889		Ywhaq	12.9452	2.50072e-38	9.89263e-37	0.563255
														Panct2	0.00780361	0.957477	2.1077		Idh1	12.9345	2.87434e-38	1.13494e-36	0.855863
														Cables1	0.00792747	1.15314	2.10087		Gsta3	12.9343	2.88148e-38	1.13563e-36	1.52738
														Atp2a2	0.00805847	0.0771685	2.09375		Plp2	12.9331	2.92881e-38	1.15213e-36	0.721831
														Pcx	0.00820777	0.513039	2.08577		Slc25a37	12.9288	3.09774e-38	1.21631e-36	1.19245
														Tbc1d30	0.00876944	0.435999	2.05703		Micos13	12.9132	3.79012e-38	1.4854e-36	0.539096
														Usp34	0.00895382	0.0411705	2.04799		Abcf1	12.9086	4.0242e-38	1.57422e-36	0.571932
														Tmod1	0.00903339	1.04293	2.04415		Klhdc2	12.8961	4.7357e-38	1.84912e-36	0.696495
														Slc25a5	0.00906284	0.122126	2.04274		Strbp	12.8743	6.28335e-38	2.44888e-36	0.573932
														Epn3	0.00923005	0.448226	2.0348		Ppa2	12.8676	6.84957e-38	2.66463e-36	0.574214
														Anapc13	0.00935588	0.198727	2.02892		Snrpg	12.8514	8.44515e-38	3.2793e-36	0.564808
														Khk	0.00959859	0.738709	2.01779		Bzw2	12.8356	1.03638e-37	4.01693e-36	0.802195
														Tmem97	0.0096361	0.741504	2.0161		Ccnt2	12.8268	1.16014e-37	4.48837e-36	0.584692
														Akap13	0.00985307	0.0542225	2.00643		Fat1	12.8229	1.22103e-37	4.71527e-36	0.620136
														Yipf6	0.0101869	0.444123	1.99196		Dennd5b	12.8208	1.2536e-37	4.83219e-36	0.881379
														Dennd5a	0.0104866	0.319874	1.97937		Asap1	12.8142	1.366e-37	5.25587e-36	1.08122
														Cd63	0.0108334	0.0225594	1.96523		Knop1	12.7833	2.03195e-37	7.80396e-36	0.604009
														Ogdh	0.0113407	0.20917	1.94536		Nudc	12.7832	2.03592e-37	7.80498e-36	0.613661
														Kcnc3	0.0118753	0.149806	1.92536		Txnl4a	12.757	2.84783e-37	1.0878e-35	0.741528
														Rmdn2	0.0120353	0.224914	1.91954		Eif3d	12.7537	2.9739e-37	1.1339e-35	0.677918
														Nfkbiz	0.0132953	0.571126	1.8763		Fndc3b	12.7398	3.55143e-37	1.35166e-35	0.5393
														Foxo3	0.0134794	0.317798	1.87033		Timm17a	12.7303	4.01233e-37	1.52432e-35	0.712526
														Chpt1	0.0140557	0.360727	1.85215		Sparc	12.7276	4.15253e-37	1.57475e-35	0.533685
														Glis3	0.0140594	0.266655	1.85203		Dync1i2	12.7198	4.59158e-37	1.73812e-35	0.538032
														Acer3	0.0145256	0.222248	1.83787		Prkcsh	12.7152	4.86868e-37	1.83972e-35	0.676724
														Hmgcr	0.0150298	0.393471	1.82305		Gnai3	12.7136	4.97093e-37	1.87499e-35	0.587325
														Dbp	0.0156089	1.03662	1.80663		Ankrd11	12.702	5.76654e-37	2.17121e-35	0.511744
														Cbfa2t3	0.0157053	4.23767	1.80395		Tes	12.6814	7.49611e-37	2.80738e-35	0.846507
														Lamp1	0.0157318	0.00797297	1.80322		Tomm22	12.6728	8.36294e-37	3.12646e-35	0.627517
														Irx5	0.0159285	0.457058	1.79783		Wars	12.6724	8.40555e-37	3.13683e-35	0.763688
														Cst8	0.0160923	0.885382	1.79338		Casp3	12.6682	8.87016e-37	3.30437e-35	1.06615
														Akap11	0.0162382	0.313905	1.78946		Otud7b	12.6388	1.29039e-36	4.79012e-35	0.650569
														Pnpla2	0.0165707	0.314742	1.78066		Etl4	12.6276	1.48832e-36	5.51516e-35	0.542396
														Vgll4	0.0170147	0.141524	1.76918		Bax	12.6176	1.68867e-36	6.23567e-35	0.641048
														Proz	0.0170673	1.58311	1.76784		Vdac2	12.6106	1.84552e-36	6.80292e-35	0.559901
														Aig1	0.0175296	0.206064	1.75623		Stard10	12.6021	2.05531e-36	7.56304e-35	0.524654
														Ccpg1	0.0176647	0.357755	1.75289		Ints6	12.5828	2.62611e-36	9.64662e-35	0.710277
														Hnrnph3	0.0181509	0.248674	1.7411		Mrps33	12.5791	2.751e-36	1.00878e-34	0.573346
														Eml6	0.0182526	0.411192	1.73868		Atp5md	12.5698	3.09345e-36	1.1316e-34	0.528769
														Tspo	0.0183312	0.0237219	1.73681		Ctnnd1	12.5698	3.09667e-36	1.1316e-34	0.542477
														Tceal9	0.0187359	0.0280201	1.72733		Lsm6	12.5604	3.48433e-36	1.27106e-34	0.655966
														5033403H07Rik	0.0189166	0.747142	1.72316		Arpc2	12.5574	3.62067e-36	1.31851e-34	0.482785
														Rbm6	0.0193872	0.192688	1.71249		Cops6	12.5478	4.0873e-36	1.48587e-34	0.635521
														Fabp12	0.0196124	1.68205	1.70747		Csnk1g3	12.546	4.18161e-36	1.51754e-34	0.713869
														Cdc42bpa	0.019915	0.154284	1.70082		Dnajb1	12.5283	5.22439e-36	1.89272e-34	0.776839
														Atg3	0.0208691	0.25988	1.6805		Grik3	12.5162	6.08636e-36	2.20122e-34	0.542027
														Ptprg	0.0211829	0.130482	1.67401		Serpinh1	12.5087	6.68916e-36	2.41508e-34	0.805891
														Rnasek	0.0215963	0.0599357	1.66562		B830012L14Rik	12.5079	6.75994e-36	2.43647e-34	1.259
														Baz2b	0.0219522	0.0730475	1.65852		Banp	12.5064	6.88382e-36	2.47688e-34	0.682681
														Ntn1	0.0223692	1.75525	1.65035		Dctpp1	12.5037	7.12167e-36	2.5581e-34	0.861307
														Tmem56	0.0235826	0.412961	1.62741		Psma5	12.499	7.56298e-36	2.712e-34	0.632462
														Filip1l	0.023698	0.39846	1.62529		Rab22a	12.4939	8.05731e-36	2.88435e-34	0.641978
														Slc1a5	0.0237741	0.357687	1.6239		Uchl3	12.4858	8.91867e-36	3.18729e-34	0.834873
														Agr2	0.0251722	1.75826	1.59908		Nt5c2	12.4823	9.32984e-36	3.32859e-34	0.609848
														9330182L06Rik	0.0255067	0.436312	1.59335		Gm3550	12.4769	9.98543e-36	3.55647e-34	0.554491
														Ly6k	0.0257094	1.79694	1.58991		Bloc1s2	12.466	1.14383e-35	4.06706e-34	0.917954
														Spink4	0.0263235	1.6843	1.57966		Mrpl34	12.4631	1.18709e-35	4.21377e-34	0.575605
														Acsl5	0.0288241	0.117877	1.54024		Bola2	12.4614	1.21225e-35	4.29585e-34	0.635345
														Crnde	0.0291094	0.693964	1.53597		Psmd7	12.4584	1.25917e-35	4.45465e-34	0.57451
														Catspere2	0.0303747	0.43295	1.51749		Mrps18a	12.4526	1.3543e-35	4.78316e-34	0.641703
														Junos	0.0305043	0.281178	1.51564		Atp5g3	12.4511	1.37909e-35	4.86255e-34	0.515236
														Nr1d1	0.0307821	0.565155	1.5117		Sap18	12.4466	1.45942e-35	5.1372e-34	0.563842
														Fcgbp	0.0308771	1.96387	1.51036		Cdk4	12.4426	1.53521e-35	5.39498e-34	0.664111
														Nexn	0.0312899	1.00969	1.5046		Snrpd2	12.4415	1.55541e-35	5.45689e-34	0.540321
														Vnn1	0.0320802	0.962851	1.49376		Phax	12.4274	1.85584e-35	6.50007e-34	0.703767
														Slc16a6	0.0320868	0.636172	1.49367		Arf4	12.424	1.93732e-35	6.77419e-34	0.54039
														Efhd2	0.0321223	0.368615	1.49319		Eif4e2	12.394	2.81661e-35	9.8325e-34	0.677224
														Itpr1	0.0331938	0.125001	1.47894		Smurf1	12.3911	2.91841e-35	1.0171e-33	0.610002
														Hnmt	0.0331964	0.559146	1.47891		5031425E22Rik	12.3802	3.34357e-35	1.16335e-33	0.672726
														Arfgef3	0.033324	0.178131	1.47724		Hcfc1r1	12.3634	4.12167e-35	1.43172e-33	0.595939
														Nsdhl	0.0342859	0.846393	1.46488		Cct8	12.3618	4.20517e-35	1.45832e-33	0.608942
														Dek	0.0343006	0.101799	1.4647		Cspp1	12.3583	4.39472e-35	1.52156e-33	0.614937
														Anxa13	0.0346374	4.49597	1.46046		Mrpl32	12.3365	5.76086e-35	1.99127e-33	0.606433
														Pik3ap1	0.0362617	1.58776	1.44055		Fxr1	12.3335	5.97677e-35	2.06252e-33	0.534361
														Slc12a8	0.0371895	2.32607	1.42958		Cyp2c68	12.3235	6.77149e-35	2.33296e-33	2.22199
														Ern2	0.0372883	3.18518	1.42843		S100a16	12.3172	7.31542e-35	2.51624e-33	0.829553
														Wnk2	0.0382687	3.553	1.41716		Arhgap10	12.308	8.20667e-35	2.8182e-33	0.69303
														Stard8	0.0392197	0.721344	1.4065		Ywhag	12.2989	9.18008e-35	3.14735e-33	0.622592
														Fhad1	0.0399211	1.66122	1.3988		Rabgap1	12.2878	1.05283e-34	3.60373e-33	0.551713
														Kcnj2	0.0407893	0.755993	1.38945		Prmt1	12.2816	1.13697e-34	3.87913e-33	0.635617
														Yae1d1	0.041183	0.3114	1.38528		Fam13b	12.2591	1.50096e-34	5.11272e-33	0.629571
														Abhd17b	0.0412161	0.251478	1.38493		Asnsd1	12.2584	1.5145e-34	5.15053e-33	0.985349
														Bicc1	0.0434385	0.134936	1.36213		Atp5g2	12.2574	1.53349e-34	5.20669e-33	0.501817
														Mbnl3	0.043475	0.452587	1.36176		Gm10260	12.247	1.74341e-34	5.90993e-33	1.25703
														Rock1	0.043816	0.0242883	1.35837		Gabarapl1	12.2463	1.75771e-34	5.94886e-33	0.75695
														2010315B03Rik	0.0439163	0.697635	1.35737		Rida	12.2454	1.77697e-34	6.00439e-33	0.928654
														Ift20	0.0445159	0.115419	1.35148		Arpc3	12.2249	2.28729e-34	7.70408e-33	0.503083
														Vps13c	0.0452583	0.45634	1.3443		Suds3	12.2186	2.47294e-34	8.31609e-33	0.636638
														Muc2	0.0462871	3.42352	1.33454		Dsg2	12.2157	2.56405e-34	8.60875e-33	1.12517
														Cpeb4	0.0468674	0.252156	1.32913		Mrpl35	12.2043	2.94843e-34	9.86788e-33	0.780828
														Spop	0.0473956	0.126793	1.32426		Ppp1ca	12.1989	3.15006e-34	1.0526e-32	0.525328
														Pde7a	0.0497093	0.188915	1.30356		Utp3	12.1969	3.22776e-34	1.07686e-32	0.605244
														Greb1l	0.0499749	0.526342	1.30125		Cops5	12.1946	3.32306e-34	1.1069e-32	0.664409
														Faf1	0.0502373	0.157774	1.29897		Mrpl28	12.1912	3.46435e-34	1.15214e-32	0.600543
														Tmem205	0.0511549	0.193132	1.29111		Klf7	12.174	4.27728e-34	1.42026e-32	0.883546
														Resf1	0.0522271	0.0889016	1.2821		Magi1	12.1696	4.51432e-34	1.49661e-32	0.499293
														Nadk	0.0530898	0.336561	1.27499		Vdac3	12.1372	6.7101e-34	2.21412e-32	0.596868
														Lpl	0.0531985	1.18917	1.2741		Col4a1	12.1308	7.258e-34	2.39117e-32	0.534673
														Nfkbia	0.0541221	0.471646	1.26663		Rbis	12.1223	8.05086e-34	2.64824e-32	0.640666
														Dynlrb2	0.0541941	0.877152	1.26605		Cacnb2	12.1161	8.678e-34	2.85009e-32	2.33408
														Dynlt3	0.0545995	0.214927	1.26281		Psmd4	12.1138	8.92072e-34	2.92525e-32	0.537807
														Shroom4	0.0567199	0.26008	1.24626		Adss	12.1103	9.31962e-34	3.05131e-32	0.593247
														1700025G04Rik	0.0574588	0.673799	1.24064		Ahsa1	12.1006	1.04903e-33	3.42929e-32	0.763883
														Gm45332	0.0574821	1.55126	1.24047		Srsf9	12.0851	1.26548e-33	4.13043e-32	0.649743
														9530036O11Rik	0.0590618	0.16855	1.22869		Mrpl21	12.078	1.38037e-33	4.49848e-32	0.593036
														Tmem256	0.0593101	0.125212	1.22687		Tst	12.0665	1.58751e-33	5.16554e-32	0.601406
														Prcd	0.0596755	0.818954	1.2242		Rars	12.0659	1.59925e-33	5.19573e-32	0.791493
														A330093E20Rik	0.0600014	1.6303	1.22184		Tpr	12.0617	1.68248e-33	5.4577e-32	0.484179
														Aldh1a7	0.0603217	0.400835	1.21953		Snrpb	12.0577	1.76721e-33	5.72376e-32	0.552367
														Rora	0.063186	0.151976	1.19938		Cdkn1a	12.0573	1.77513e-33	5.74059e-32	1.34571
														Cirbp	0.0641603	0.50492	1.19273		Enah	12.0501	1.93724e-33	6.25524e-32	1.75161
														Tmed10	0.0652884	0.0169493	1.18516		Hipk2	12.0428	2.1166e-33	6.82393e-32	0.566081
														Dnaja4	0.0660156	0.796536	1.18035		Zwint	12.0381	2.23931e-33	7.20854e-32	0.723585
														Gm17167	0.0676418	1.79859	1.16978		Nipsnap1	12.0241	2.6544e-33	8.53171e-32	0.973327
														Radil	0.067703	0.534019	1.16939		Vdac1	12.0239	2.66165e-33	8.54199e-32	0.557126
														Aqp5	0.0693267	0.0914712	1.1591		Hnrnpa0	12.0235	2.67495e-33	8.57162e-32	0.564459
														Bcan	0.0700057	1.31664	1.15487		Rbms1	12.02	2.79117e-33	8.93047e-32	0.502142
														Pdzd2	0.0703707	1.21519	1.15261		Stub1	12.0174	2.88052e-33	9.2024e-32	0.550211
														Acot1	0.0709849	0.523945	1.14883		Ube2b	12.017	2.89217e-33	9.22564e-32	0.478233
														Mgll	0.0713419	1.81171	1.14666		Dtymk	12.014	3.00074e-33	9.55748e-32	0.715333
														AI182371	0.0714712	1.24714	1.14587		Bcas2	12.0113	3.1e-33	9.85873e-32	0.629051
														Gm20300	0.0732824	0.896563	1.135		Slc15a2	11.9883	4.09297e-33	1.2997e-31	0.663006
														Rasl11a	0.073352	0.340321	1.13459		Trappc6a	11.9819	4.41927e-33	1.3991e-31	0.583925
														Tmem176b	0.0737243	0.0528496	1.13239		Pigx	11.9606	5.71197e-33	1.80565e-31	0.92552
														AW112010	0.0738501	1.03311	1.13165		Slc4a7	11.9548	6.12651e-33	1.9338e-31	0.920799
														Gpx4	0.0745221	-0.00268821	1.12771		Arl5b	11.9369	7.59987e-33	2.39526e-31	0.805752
														Tgfbi	0.0753782	0.962603	1.12275		Lamtor2	11.9319	8.07135e-33	2.54007e-31	0.508125
														Cyp51	0.0769415	0.399569	1.11384		Mrpl43	11.9308	8.17921e-33	2.57017e-31	0.579394
														Col23a1	0.0770928	0.372806	1.11299		Chchd5	11.9241	8.85843e-33	2.77946e-31	0.977985
														Camk2b	0.0773562	0.957923	1.1115		Gsto1	11.9237	8.90278e-33	2.78923e-31	1.12456
														Sgms1	0.0798411	0.0651403	1.09777		Vegfa	11.9233	8.9441e-33	2.79802e-31	0.627233
														Ang	0.0804866	0.165672	1.09428		Trmt1	11.9185	9.48254e-33	2.96207e-31	0.801358
														Tff3	0.0820355	1.52681	1.086		Csnk2a2	11.9176	9.58416e-33	2.98938e-31	0.619625
														Gja1	0.0838805	0.222313	1.07634		Adgrl3	11.9111	1.0356e-32	3.22535e-31	1.26595
														Ttc28	0.0855623	0.859204	1.06772		Taf1d	11.9092	1.05988e-32	3.2961e-31	0.721104
														Slc25a36	0.0864127	0.368543	1.06342		1810058I24Rik	11.9071	1.08749e-32	3.37699e-31	0.540923
														Col4a3	0.0868372	0.262005	1.06129		Lama5	11.901	1.16994e-32	3.62766e-31	0.715741
														Mbnl1	0.0869538	0.0495542	1.06071		Eloc	11.8986	1.20383e-32	3.72726e-31	0.557056
														Cfap69	0.0878539	1.12239	1.05624		Eif1a	11.8871	1.38049e-32	4.26799e-31	0.588083
														Stag2	0.0885926	0.122124	1.0526		Pir	11.8787	1.52728e-32	4.71489e-31	1.23172
														Pde1c	0.0947258	0.482138	1.02353		Rcor1	11.876	1.57764e-32	4.86323e-31	0.640207
														Tsix	0.095188	1.17996	1.02142		Ssrp1	11.8752	1.59325e-32	4.90417e-31	0.636251
														H2-DMb2	0.0961083	0.894768	1.01724		mt-Nd1	11.8554	2.01674e-32	6.1987e-31	0.257714
														Ntf3	0.0970157	0.988662	1.01316		Mrps16	11.8441	2.30883e-32	7.08388e-31	0.575727
														Vpreb3	0.0977533	1.40506	1.00987		Nop10	11.844	2.31146e-32	7.08388e-31	0.509489
														Kank1	0.100804	1.15852	0.996524		Klc3	11.8398	2.43152e-32	7.441e-31	0.938714
														Pmp22	0.102251	0.893413	0.990332		Got2	11.8229	2.97153e-32	9.08038e-31	0.628398
														Rere	0.102931	-0.00394335	0.987456		Ddr1	11.8228	2.97644e-32	9.08222e-31	1.01707
														Cox7a2	0.105575	0.000250662	0.976441		Tpd52	11.8158	3.23529e-32	9.85325e-31	0.42962
														Apobec3	0.106502	0.286733	0.972644		Mrps5	11.8157	3.23846e-32	9.85325e-31	0.743768
														Rasa4	0.109038	2.0567	0.962423		Lars	11.7966	4.06343e-32	1.23454e-30	0.644163
														Nfic	0.109923	0.340117	0.958911		Mea1	11.7942	4.18247e-32	1.26888e-30	0.639953
														Szt2	0.110129	0.326924	0.9581		Mrpl15	11.7877	4.51966e-32	1.36921e-30	0.707836
														Tkt	0.110348	0.108103	0.957236		Chd4	11.7756	5.2154e-32	1.5732e-30	0.506604
														Muc13	0.111078	3.17049	0.954371		Higd2a	11.7729	5.38448e-32	1.62188e-30	0.5492
														Phf20l1	0.111315	0.123623	0.953448		Calm1	11.7691	5.63114e-32	1.69376e-30	0.412735
														Ids	0.111752	0.643923	0.951744		Eif6	11.7505	7.01643e-32	2.10443e-30	0.641457
														Ccdc15	0.111854	0.704781	0.95135		Zfp827	11.7465	7.35643e-32	2.20327e-30	0.703068
														Glt1d1	0.11201	0.896547	0.950743		Nck2	11.7377	8.16453e-32	2.44183e-30	0.794695
														Zfp467	0.112027	0.356649	0.950678		Phb	11.7234	9.6765e-32	2.88993e-30	0.61814
														Gm48530	0.112383	2.47787	0.949299		Klf6	11.7186	1.0236e-31	3.05271e-30	0.746401
														Wdr91	0.116277	0.454733	0.934508		Vps29	11.707	1.17394e-31	3.49612e-30	0.586921
														Pank3	0.116431	0.39045	0.933932		Sra1	11.7013	1.25524e-31	3.73297e-30	0.561109
														Cisd1	0.117988	0.280897	0.928161		Sf3b2	11.6989	1.29119e-31	3.83447e-30	0.48423
														Atoh1	0.11806	3.26328	0.927899		Ehmt1	11.6937	1.37268e-31	4.07074e-30	0.519326
														Gm30015	0.120579	1.0899	0.918727		Asxl1	11.6834	1.54955e-31	4.5888e-30	0.543795
														Rhbdl3	0.121237	1.34422	0.916366		H13	11.6808	1.59809e-31	4.72591e-30	0.511466
														Scarf2	0.122158	0.616404	0.913077		Gm47283	11.6772	1.66672e-31	4.92196e-30	0.603444
														Eif4e3	0.123307	1.00037	0.909014		Ube2m	11.667	1.87896e-31	5.54096e-30	0.568864
														Cd82	0.124037	0.53011	0.906449		C1qbp	11.661	2.0155e-31	5.9353e-30	0.659945
														Ndufb11	0.124041	0.0187636	0.906434		Rrbp1	11.6559	2.14054e-31	6.29473e-30	0.41997
														Elfn1	0.125024	0.443639	0.903006		Nnat	11.6492	2.3168e-31	6.80359e-30	1.2733
														Tmbim6	0.125839	-0.0171669	0.900183		Zfp36l1	11.6428	2.49641e-31	7.32082e-30	0.552377
														Sec1	0.129395	1.47792	0.888082		Dsp	11.6412	2.54404e-31	7.45015e-30	0.637914
														Arhgap28	0.1358	0.511396	0.867102		Hypk	11.6308	2.87263e-31	8.38912e-30	0.659966
														Zbtb4	0.136049	0.404012	0.866306		Pdcl3	11.6301	2.89768e-31	8.45055e-30	0.793274
														Pde8a	0.13614	0.913763	0.866015		Neat1	11.6244	3.09638e-31	9.01757e-30	0.529452
														Higd1a	0.136624	0.100422	0.864472		Eya2	11.6152	3.44819e-31	1.00283e-29	0.559202
														Egfr	0.136711	1.17469	0.864196		Pcbp1	11.6094	3.69182e-31	1.0722e-29	0.511206
														Wipf1	0.139285	0.540428	0.856095		Lsm4	11.6045	3.90912e-31	1.13375e-29	0.539093
														Pgs1	0.142831	0.272116	0.845178		Cdk2ap2	11.6007	4.08871e-31	1.18421e-29	0.527164
														Cdk8	0.143346	0.0617469	0.843615		Srpk2	11.5971	4.26029e-31	1.23221e-29	0.523466
														Tgtp1	0.14354	1.83506	0.843027		Spats2	11.5962	4.30734e-31	1.24411e-29	0.680802
														Pitpnm3	0.146282	0.632322	0.834809		Pvt1	11.5936	4.44283e-31	1.28149e-29	1.26678
														Adgrg7	0.146705	1.35885	0.833556		Gfer	11.5921	4.51856e-31	1.30155e-29	0.653369
														Bcas1	0.149254	1.58167	0.826073		Pfkl	11.5784	5.30439e-31	1.52583e-29	1.11979
														Tuba8	0.152387	1.36225	0.817053		B4galt6	11.5746	5.54389e-31	1.59255e-29	1.15026
														Megf6	0.152616	0.334542	0.816399		Tgfbr1	11.573	5.64621e-31	1.61973e-29	0.646988
														Pdlim2	0.153711	0.321411	0.813296		Kng2	11.5728	5.66048e-31	1.62162e-29	0.517156
														Stx12	0.157996	0.322506	0.801355		Eif3c	11.5678	6.0032e-31	1.71514e-29	0.475926
														Tbc1d24	0.159576	0.541349	0.797032		Rnf10	11.5642	6.25787e-31	1.78548e-29	0.559501
														9530077C05Rik	0.15984	0.469572	0.796315		Gm11273	11.5623	6.40001e-31	1.82357e-29	0.626453
														Tmem154	0.160076	0.827549	0.795675		S100a1	11.5611	6.48617e-31	1.84563e-29	0.488035
														Rab27a	0.162101	0.141807	0.790215		Rbm25	11.5528	7.14148e-31	2.02935e-29	0.489769
														Sqle	0.163979	0.591492	0.785213		Nmt2	11.5483	7.52706e-31	2.13317e-29	0.588966
														Jak2	0.164161	0.368438	0.78473		Chmp3	11.5442	7.8974e-31	2.23512e-29	0.528426
														Gna14	0.165151	2.95545	0.782119		St6gal1	11.5416	8.13978e-31	2.30063e-29	1.10774
														Sacm1l	0.166315	0.281779	0.779068		Zc3h13	11.5368	8.60869e-31	2.42991e-29	0.531631
														Sec14l4	0.168153	0.304449	0.774294		Eif5a	11.5355	8.73444e-31	2.46211e-29	0.473001
														Axin2	0.170115	1.53883	0.769259		Micu2	11.535	8.78959e-31	2.47435e-29	0.612098
														Acss3	0.170762	0.383383	0.76761		Atxn10	11.526	9.76257e-31	2.74458e-29	0.434691
														Agpat3	0.172666	0.266345	0.762792		Large1	11.5101	1.17284e-30	3.29286e-29	0.592181
														Kank2	0.173127	0.373634	0.761636		Mri1	11.4908	1.46716e-30	4.1137e-29	0.660534
														Ctps	0.174415	0.396283	0.758416		Ralb	11.4848	1.57236e-30	4.40282e-29	0.975493
														Guca2b	0.175385	4.96083	0.756008		Cd9	11.4839	1.58876e-30	4.44285e-29	0.49084
														Gfpt1	0.176029	0.149298	0.754416		Aamp	11.4824	1.61688e-30	4.51549e-29	0.532741
														Fzd3	0.176979	0.714886	0.752078		Luc7l	11.4808	1.64706e-30	4.5937e-29	0.563093
														Crybg3	0.177008	0.425255	0.752007		Cox5b	11.4773	1.71469e-30	4.77599e-29	0.472987
														Lyn	0.181162	0.557157	0.741933		Clasp1	11.4757	1.74738e-30	4.86063e-29	0.586791
														Klhl7	0.18385	0.467959	0.735536		Hecw1	11.4748	1.76648e-30	4.90728e-29	1.42476
														Daam1	0.185621	0.183871	0.731374		Hnrnpf	11.4697	1.87401e-30	5.19915e-29	0.500537
														Fbxo4	0.185971	0.415897	0.730555		4930402H24Rik	11.4583	2.13774e-30	5.92302e-29	0.616099
														B3gnt5	0.186672	0.921682	0.72892		Ubr2	11.4527	2.27927e-30	6.30689e-29	0.518414
														Scgb1a1	0.187406	0.366165	0.727216		Ece1	11.449	2.37987e-30	6.57661e-29	0.57526
														Il6st	0.188055	0.328964	0.725714		Rnps1	11.4427	2.55856e-30	7.06117e-29	0.639272
														Gm33248	0.188566	1.17011	0.724537		Gpatch4	11.4424	2.56714e-30	7.07558e-29	0.73836
														Ephx1	0.188827	0.883965	0.723936		Tspan5	11.4378	2.70576e-30	7.44789e-29	1.07757
														Shisa4	0.191544	1.21071	0.717731		Ppig	11.4282	3.02476e-30	8.31513e-29	0.495032
														Lss	0.191742	0.699364	0.717283		Psmd6	11.4279	3.03201e-30	8.32422e-29	0.623196
														P2ry2	0.193004	1.00071	0.714434		Ciao2b	11.4024	4.06981e-30	1.11589e-28	0.669278
														Col6a1	0.197555	0.346405	0.704313		Trmt112	11.3962	4.36955e-30	1.19497e-28	0.539618
														Prob1	0.200497	1.15963	0.697891		Map1lc3b	11.39	4.6877e-30	1.28031e-28	0.457084
														Plaat3	0.202514	0.42201	0.693544		Esyt2	11.3837	5.04209e-30	1.37532e-28	0.541026
														Mmp28	0.203326	2.12155	0.691807		Acadm	11.381	5.20088e-30	1.4168e-28	0.591587
														Oma1	0.203546	0.341769	0.691337		Jtb	11.3707	5.85432e-30	1.59275e-28	0.543811
														Galnt5	0.207897	1.49407	0.682151		Vapb	11.3691	5.9584e-30	1.61898e-28	0.595062
														Klf15	0.207936	0.812622	0.68207		Sri	11.3672	6.09448e-30	1.65382e-28	0.523166
														Podn	0.209046	2.05615	0.679758		Atp5mpl	11.3578	6.7848e-30	1.83642e-28	0.471999
														Hkdc1	0.209875	0.569349	0.678039		Ctsa	11.3418	8.14364e-30	2.20139e-28	0.695551
														Slpi	0.211614	0.277984	0.674455		Eif3i	11.32	1.04513e-29	2.82157e-28	0.518291
														Hmgcs2	0.211914	2.92444	0.67384		Jund	11.3125	1.13794e-29	3.06821e-28	0.460535
														Rflna	0.215257	3.06902	0.667042		Ndufa10	11.31	1.17089e-29	3.15303e-28	0.528187
														Pttg1	0.217029	0.4151	0.663483		Edem2	11.3018	1.28514e-29	3.45442e-28	0.744939
														H6pd	0.221954	0.350789	0.653736		Swi5	11.3018	1.28609e-29	3.45442e-28	0.451061
														A330032B11Rik	0.223384	0.887544	0.650947		Btbd9	11.3004	1.30572e-29	3.50268e-28	0.493939
														Slc1a3	0.223869	0.216137	0.650006		Nsmce2	11.2831	1.58982e-29	4.25939e-28	0.503918
														Notum	0.224856	1.95677	0.648096		Lamc1	11.2816	1.61691e-29	4.32647e-28	0.589116
														Scgb3a1	0.228091	1.81131	0.641891		Nudt4	11.2807	1.63461e-29	4.36828e-28	0.51342
														Ick	0.228222	0.236534	0.641643		Ppp2cb	11.2781	1.68413e-29	4.49493e-28	0.601045
														Sp5	0.228774	0.565978	0.640593		Raph1	11.275	1.74319e-29	4.64667e-28	0.510823
														Insyn1	0.23235	1.53422	0.633858		Golim4	11.2592	2.08639e-29	5.55448e-28	0.668911
														Rnf125	0.233167	0.746144	0.632333		Rsl1d1	11.2519	2.26719e-29	6.02822e-28	0.578602
														Cobll1	0.23686	0.181484	0.625509		Ndufs2	11.2507	2.2969e-29	6.09952e-28	0.543164
														Gkap1	0.237821	0.322467	0.623749		Cmas	11.249	2.34329e-29	6.21487e-28	0.562039
														Il13ra1	0.237942	0.498862	0.623529		Igfbp5	11.2381	2.65112e-29	7.02247e-28	1.4876
														Fchsd2	0.239448	0.122411	0.62079		Sec11a	11.2267	3.01584e-29	7.97855e-28	0.5008
														Ak9	0.240548	1.51145	0.618798		Ypel2	11.2202	3.24495e-29	8.5739e-28	0.636118
														Iqgap2	0.243565	0.537381	0.613385		Prkacb	11.2082	3.716e-29	9.80624e-28	0.619655
														Rep15	0.244246	2.14143	0.612173		Bnip3	11.2051	3.84927e-29	1.01326e-27	0.707776
														Baiap3	0.248519	1.1773	0.604641		Sdcbp2	11.2031	3.9365e-29	1.03493e-27	1.3134
														Capn8	0.249337	1.47201	0.603214		Cfdp1	11.2	4.07681e-29	1.07048e-27	0.478196
														Rassf2	0.25056	0.462468	0.601088		Tacc2	11.1993	4.10924e-29	1.07765e-27	0.56895
														Hykk	0.251014	0.932787	0.600301		Esrrg	11.1984	4.15348e-29	1.0879e-27	2.27768
														Lpar3	0.25286	0.506247	0.59712		Mllt10	11.1882	4.65565e-29	1.21641e-27	0.477873
														Bach1	0.254494	0.270879	0.594322		Metap1d	11.1782	5.21291e-29	1.36032e-27	0.908754
														Ddt	0.255752	0.112184	0.592181		Stx16	11.1763	5.32504e-29	1.38787e-27	0.565241
														Gm32633	0.258079	1.04894	0.588247		Fcf1	11.1708	5.66575e-29	1.47484e-27	0.617471
														Cth	0.259343	0.710233	0.586125		Rfk	11.1622	6.24556e-29	1.62377e-27	0.621002
														Chst4	0.261632	1.27179	0.582309		Plekhh2	11.1586	6.49705e-29	1.68707e-27	0.696618
														E130102H24Rik	0.261925	0.555991	0.581823		Bok	11.1532	6.90804e-29	1.79159e-27	1.71733
														Rundc3b	0.262476	0.70179	0.58091		Llph	11.1343	8.53971e-29	2.21204e-27	0.52069
														Snx4	0.263498	0.0993291	0.579223		Pld3	11.1302	8.94642e-29	2.31454e-27	0.793194
														Cited4	0.264873	1.91724	0.576962		Gipc1	11.1267	9.2966e-29	2.40219e-27	0.807248
														Crct1	0.265237	1.02425	0.576365		Fkbp3	11.1228	9.71638e-29	2.50759e-27	0.551112
														Gm29724	0.267596	0.6095	0.572521		Fyb	11.109	1.13384e-28	2.91548e-27	0.882622
														Neo1	0.269006	0.311406	0.570237		Hnrnpc	11.1077	1.15068e-28	2.9552e-27	0.46149
														Tnfaip8l3	0.270595	1.07812	0.567679		Edf1	11.1032	1.21016e-28	3.10414e-27	0.402789
														Hint2	0.270824	0.141387	0.567314		Dap3	11.1031	1.21162e-28	3.10414e-27	0.605494
														Spdef	0.273466	1.82105	0.563096		Crip2	11.0951	1.3246e-28	3.38945e-27	0.443696
														Robo2	0.273696	1.0808	0.562732		Dapp1	11.0942	1.33899e-28	3.42213e-27	0.991656
														Tesc	0.278829	1.79425	0.554661		Cops2	11.0932	1.35327e-28	3.45444e-27	0.620076
														Bpifb5	0.28434	1.66835	0.546163		Bcl10	11.0924	1.36519e-28	3.48065e-27	0.722085
														Gm12216	0.286005	0.475006	0.543626		Slk	11.0906	1.39419e-28	3.54603e-27	0.560672
														Zc3h12a	0.287107	0.708114	0.541957		Ccdc25	11.0795	1.57678e-28	4.00078e-27	0.563954
														Gm1123	0.289501	2.08893	0.53835		Emp3	11.0773	1.61696e-28	4.09779e-27	1.16439
														Ccdc189	0.291052	0.380335	0.536029		Ezr	11.0724	1.70697e-28	4.32071e-27	0.51479
														Stx19	0.293996	0.310557	0.531658		Zfp706	11.0701	1.75247e-28	4.43056e-27	0.497371
														Pdzrn3	0.294487	1.48789	0.530934		D8Ertd738e	11.0652	1.85149e-28	4.67528e-27	0.420684
														Snx22	0.294653	0.924665	0.53069		Znrd2	11.062	1.91861e-28	4.83899e-27	0.727284
														Lrrc26	0.296471	1.34392	0.528018		Pdcd5	11.0579	2.00735e-28	5.05676e-27	0.506962
														Gm17182	0.29727	1.15812	0.52685		Zfp951	11.0525	2.13122e-28	5.36237e-27	1.99004
														0610043K17Rik	0.299623	0.751013	0.523424		Snrnp48	11.0517	2.15199e-28	5.4082e-27	0.607691
														Med8	0.301474	0.25199	0.52075		2025-09-09	11.047	2.26549e-28	5.68666e-27	0.871241
														Usp33	0.302274	0.116101	0.5196		F11r	11.0462	2.28768e-28	5.73553e-27	0.530288
														Ifnar2	0.302385	0.279144	0.519439		Atp5j2	11.0423	2.38746e-28	5.97858e-27	0.381912
														N4bp2l2	0.306503	0.0669393	0.513566		Snw1	11.0306	2.72143e-28	6.8068e-27	0.515037
														Osbpl1a	0.306773	0.489721	0.513182		Nudt5	11.0201	3.05619e-28	7.63505e-27	0.717591
														Sap25	0.306876	0.938634	0.513037		H2afz	11.0187	3.10662e-28	7.75184e-27	0.435576
														Senp6	0.306948	0.0462309	0.512936		Hif1a	11.0138	3.27895e-28	8.17218e-27	0.543825
														Pink1	0.307063	0.394805	0.512773		Rab3gap1	11.0127	3.31958e-28	8.26368e-27	0.531696
														Cdyl2	0.308341	0.31162	0.510969		Reep3	11.008	3.49555e-28	8.69147e-27	0.484248
														Luc7l2	0.311241	-0.0148989	0.506904		Ctse	10.9887	4.33186e-28	1.07456e-26	2.37004
														Stx17	0.31215	0.232129	0.505636		Csnk2a1	10.985	4.51461e-28	1.11857e-26	0.464551
														Gbf1	0.31257	0.175244	0.505053		Cmpk1	10.9832	4.60297e-28	1.13913e-26	0.569442
														Ntn5	0.316765	1.42788	0.499262		Ssr3	10.9816	4.6881e-28	1.15748e-26	0.529998
														Trim12a	0.316933	0.539942	0.499033		Mrpl57	10.9799	4.77663e-28	1.17796e-26	0.511156
														Cygb	0.317442	1.75197	0.498335		Ndufa4	10.9732	5.14465e-28	1.26723e-26	0.371651
														Klhl32	0.324432	1.35044	0.488876		Abi1	10.9681	5.43744e-28	1.33779e-26	0.490575
														Rel	0.325254	0.556138	0.487777		Ppat	10.958	6.08107e-28	1.4944e-26	0.626588
														E030044B06Rik	0.325267	1.30953	0.48776		Dnajc10	10.9527	6.45193e-28	1.58369e-26	0.605651
														Tppp3	0.326684	0.421223	0.485872		Naa35	10.9509	6.58162e-28	1.61364e-26	0.629586
														Huwe1	0.333797	0.0239309	0.476518		Lrrfip1	10.9505	6.60812e-28	1.61826e-26	0.458161
														Ncor1	0.334612	-0.0446145	0.475458		Ist1	10.9323	8.07412e-28	1.97498e-26	0.594148
														Syt2	0.335601	0.892322	0.474177		Ugp2	10.9233	8.92297e-28	2.18008e-26	0.58473
														Bcl11a	0.340479	0.918226	0.46791		Vps35	10.9178	9.47488e-28	2.30957e-26	0.510136
														Gm49123	0.340789	1.21588	0.467515		Mrpl12	10.9165	9.60776e-28	2.33926e-26	0.500884
														Wipf3	0.341235	0.709907	0.466947		Traf5	10.9146	9.81101e-28	2.38599e-26	0.49064
														Capn9	0.342399	1.77709	0.465468		Spcs1	10.9066	1.07144e-27	2.60269e-26	0.482625
														Acox1	0.344283	0.165161	0.463084		Psip1	10.9064	1.07374e-27	2.60527e-26	0.64728
														Gm40999	0.344694	0.73342	0.462566		Ranbp1	10.906	1.07902e-27	2.61508e-26	0.530721
														Mesp2	0.344703	1.29464	0.462555		Fam102b	10.8884	1.30873e-27	3.16814e-26	0.774883
														Acot2	0.346174	0.455708	0.460705		Pck2	10.8879	1.31684e-27	3.18414e-26	0.825472
														Ptpn1	0.348724	0.248534	0.457518		Arhgap18	10.884	1.37463e-27	3.32005e-26	0.602075
														Aldh1l1	0.351914	0.600459	0.453564		P4hb	10.8826	1.39497e-27	3.36533e-26	0.423772
														Gns	0.353225	0.19591	0.451949		Ddx18	10.874	1.53349e-27	3.69528e-26	0.634399
														Lonrf3	0.353602	0.808571	0.451485		Zfp106	10.8701	1.59978e-27	3.85062e-26	0.485719
														Lemd1	0.355178	2.21308	0.449554		Snhg8	10.8697	1.60664e-27	3.8627e-26	0.63393
														Cntfr	0.355941	1.6273	0.448622		Ivns1abp	10.8686	1.62629e-27	3.90549e-26	0.651836
														Dclk1	0.355999	0.244939	0.448551		Marcks	10.8555	1.87734e-27	4.50326e-26	0.672815
														Setd2	0.356214	0.176502	0.448289		Gpr39	10.8527	1.93629e-27	4.63939e-26	0.757156
														Rgma	0.356415	1.08192	0.448044		mt-Co2	10.8482	2.03405e-27	4.86809e-26	0.211706
														Tmem132c	0.359719	0.725703	0.444036		Il34	10.8335	2.38867e-27	5.71032e-26	0.49973
														Xrn1	0.359831	0.218687	0.443902		Sdhaf4	10.8326	2.41139e-27	5.75811e-26	0.663379
														Ces1c	0.365454	1.3015	0.437167		Cebpz	10.8282	2.53027e-27	6.03515e-26	0.520303
														Prex1	0.365902	1.65022	0.436635		Antxr2	10.8255	2.60632e-27	6.20952e-26	1.07249
														Mia3	0.367103	0.364724	0.435213		Acin1	10.8199	2.77196e-27	6.59669e-26	0.466542
														Mesp1	0.369961	1.66329	0.431844		Glrx2	10.8185	2.81461e-27	6.69064e-26	0.569585
														Crebbp	0.370126	0.0271916	0.431651		Rps19	10.8176	2.84094e-27	6.74562e-26	0.276723
														Fam49b	0.370491	0.128959	0.431222		Fdx2	10.8167	2.86873e-27	6.80396e-26	0.714089
														Tmem8b	0.370899	0.980252	0.430744		Emg1	10.8068	3.19663e-27	7.57313e-26	0.576076
														Ciita	0.374925	0.404066	0.426056		Psmc3	10.8058	3.23107e-27	7.64615e-26	0.481256
														Olfr171	0.375137	1.50408	0.42581		Chml	10.8028	3.33979e-27	7.89455e-26	1.9828
														Ndufaf3	0.382356	0.410507	0.417533		Pmepa1	10.8023	3.35622e-27	7.92451e-26	0.5634
														Fbln5	0.383175	0.619494	0.416603		Selenow	10.7965	3.57697e-27	8.4363e-26	0.438542
														Thsd4	0.384254	0.0262645	0.415382		Ppid	10.7962	3.58762e-27	8.45195e-26	0.74341
														Irx3os	0.386498	1.00929	0.412853		Acadl	10.796	3.59338e-27	8.45607e-26	0.456486
														Tnfsf13os	0.388332	0.877608	0.410796		Ppdpf	10.7934	3.69827e-27	8.6932e-26	0.49746
														Gm32569	0.391311	1.63981	0.407478		Mff	10.7921	3.75255e-27	8.81098e-26	0.521369
														Snrk	0.393702	0.326923	0.404832		Ipo5	10.791	3.79759e-27	8.9068e-26	0.663387
														Gimap9	0.394238	0.560364	0.404241		Tnks2	10.7878	3.92889e-27	9.20451e-26	0.463006
														Gadd45g	0.404007	0.316217	0.393611		Rnaseh2c	10.7808	4.24275e-27	9.9288e-26	0.543598
														Gm48226	0.404466	0.737113	0.393118		Dnmt3a	10.7734	4.59918e-27	1.0751e-25	0.609967
														Pon1	0.405414	1.55275	0.392101		Tomm40	10.7695	4.79616e-27	1.1199e-25	0.65656
														Itm2a	0.405497	0.504854	0.392012		Jade1	10.7649	5.04189e-27	1.1755e-25	0.88147
														Smim27	0.406014	0.414196	0.391459		Hist1h1c	10.7625	5.17207e-27	1.20368e-25	1.02567
														Aard	0.406036	3.65595	0.391436		Dcaf8	10.7596	5.33936e-27	1.2411e-25	0.505998
														Ttc38	0.408901	0.498935	0.388382		Eif3g	10.7595	5.34464e-27	1.2411e-25	0.53769
														Zbtb10	0.409223	0.713945	0.38804		Cdk14	10.7531	5.73289e-27	1.32979e-25	0.466732
														Lrrfip2	0.411418	0.117019	0.385717		Vps4b	10.7492	5.98076e-27	1.38576e-25	0.513186
														Camk1d	0.412825	0.030994	0.384234		Lsm1	10.7341	7.03804e-27	1.62716e-25	0.668181
														Smim31	0.415508	1.81256	0.381421		Pqlc1	10.7273	7.57999e-27	1.75054e-25	0.650755
														Sfta3-ps	0.415535	0.0236844	0.381392		Slc25a13	10.7248	7.78341e-27	1.79555e-25	0.969777
														Gm15657	0.420039	4.09067	0.37671		Fam107b	10.7229	7.94407e-27	1.83061e-25	0.853105
														Steap4	0.420801	1.14665	0.375923		Med19	10.7219	8.03053e-27	1.84851e-25	0.549591
														Unc5d	0.421684	1.68618	0.375012		Hagh	10.7145	8.70343e-27	2.00122e-25	0.567798
														Zdhhc14	0.423376	0.85502	0.373274		Rap1gds1	10.7141	8.74141e-27	2.00776e-25	0.587347
														Sult1c2	0.424783	2.2867	0.371833		Ddx27	10.7116	8.98243e-27	2.06088e-25	0.686054
														Mcam	0.426789	1.7995	0.369787		Foxo1	10.7096	9.17148e-27	2.10194e-25	0.564916
														Satb1	0.42714	1.36297	0.36943		Stk24	10.7095	9.18136e-27	2.10194e-25	0.626418
														Zswim5	0.431902	0.745768	0.364615		Rheb	10.708	9.33342e-27	2.13444e-25	0.520637
														Calml4	0.432044	0.555405	0.364472		Nop56	10.7069	9.44457e-27	2.15752e-25	0.708721
														Hdac7	0.432961	0.234443	0.363551		Dars	10.7015	1.00091e-26	2.28399e-25	0.639494
														Slc6a7	0.433729	3.8243	0.362781		Gstm5	10.7011	1.00621e-26	2.29361e-25	1.71228
														Ano7	0.434129	2.34965	0.362381		Arl6ip4	10.6998	1.02019e-26	2.32296e-25	0.510444
														Scarf1	0.434763	0.583512	0.361747		Tmem131	10.6965	1.05689e-26	2.40394e-25	0.528954
														Arhgef6	0.437981	0.801723	0.358545		Pnp	10.6936	1.09107e-26	2.47901e-25	0.617546
														Arhgap44	0.437988	0.113163	0.358537		Grpel1	10.6923	1.10652e-26	2.51141e-25	0.498963
														Rasef	0.438575	0.283513	0.357956		Tmc4	10.6915	1.11509e-26	2.52813e-25	0.503016
														Hdac8	0.440028	0.199601	0.35652		Clta	10.6898	1.1358e-26	2.57233e-25	0.449877
														2025-09-07	0.446674	0.00594368	0.350009		Zfhx3	10.6854	1.19078e-26	2.69394e-25	0.454647
														Tnfaip3	0.447601	0.768839	0.349109		Plekha6	10.6832	1.22004e-26	2.75719e-25	0.71618
														Irf1	0.447912	0.418477	0.348807		Cyfip1	10.6823	1.23143e-26	2.77995e-25	0.510143
														Lpin1	0.449048	0.562172	0.347707		Tsc22d4	10.6728	1.3638e-26	3.07535e-25	0.504225
														Cxxc4	0.45285	0.746893	0.344046		Rpl7l1	10.6728	1.3652e-26	3.07535e-25	0.514911
														C1rl	0.454108	0.567505	0.342841		Nudt21	10.6698	1.40866e-26	3.16649e-25	0.641245
														Zbtb46	0.457892	0.803631	0.339237		Srgap1	10.6694	1.41518e-26	3.17775e-25	0.890428
														Tbx1	0.458372	0.908425	0.338782		Ffar4	10.6683	1.43204e-26	3.21219e-25	1.38781
														Scmh1	0.45936	0.146063	0.337847		Cplane1	10.661	1.54846e-26	3.46964e-25	0.82443
														Trp53inp2	0.461569	0.302976	0.335763		Ccdc58	10.6604	1.55961e-26	3.49091e-25	0.682701
														Mctp2	0.463956	0.471454	0.333523		Snhg6	10.6591	1.58127e-26	3.53563e-25	1.36525
														Tmem123	0.467289	0.359238	0.330415		Nhsl1	10.6545	1.66199e-26	3.71218e-25	0.882868
														Epb42	0.469433	1.8317	0.328426		Rin2	10.6496	1.75176e-26	3.90442e-25	0.499254
														Gm31356	0.470051	0.868489	0.327855		Ereg	10.6448	1.84367e-26	4.10494e-25	1.69813
														Edar	0.47132	1.29567	0.326684		Ergic3	10.633	2.09349e-26	4.65626e-25	0.50271
														Cd177	0.47317	0.632825	0.324983		Fbl	10.6303	2.15378e-26	4.7853e-25	0.637844
														Lypd6b	0.473298	0.395031	0.324865		Glg1	10.626	2.25566e-26	5.00638e-25	0.443142
														Zfp991	0.473472	2.10607	0.324706		Arf3	10.6239	2.3064e-26	5.11361e-25	0.492934
														Togaram2	0.474454	0.419478	0.323806		Colgalt1	10.6046	2.83814e-26	6.27934e-25	0.683634
														Lhpp	0.475788	0.651025	0.322587		Exosc5	10.5917	3.25597e-26	7.1812e-25	0.614825
														Comt	0.477479	0.0969673	0.321046		Exosc4	10.5878	3.39369e-26	7.47711e-25	0.58044
														Zfp521	0.478099	0.262965	0.320482		Tmem258	10.5805	3.67034e-26	8.0782e-25	0.467145
														Smoc2	0.480153	2.28646	0.318621		Clstn2	10.5796	3.70513e-26	8.14627e-25	1.7206
														Nlrc5	0.484152	0.737343	0.315018		Fam104a	10.5736	3.95231e-26	8.68068e-25	0.485774
														Fads1	0.486648	0.446311	0.312785		Cux1	10.5703	4.09282e-26	8.97994e-25	0.420958
														Pla2g10os	0.487305	3.15357	0.312199		Tpd52l2	10.568	4.19369e-26	9.19168e-25	0.50067
														Camk2n1	0.487868	0.212347	0.311698		Ppp1r12b	10.5654	4.31034e-26	9.43753e-25	0.511686
														Fam222a	0.489149	0.574745	0.310559		Ostc	10.5642	4.36643e-26	9.55044e-25	0.506308
														Nr4a3	0.48968	1.21301	0.310088		Ptprs	10.5639	4.37875e-26	9.56745e-25	1.01211
														Sowaha	0.490481	1.08531	0.309378		Trim33	10.5611	4.51548e-26	9.85599e-25	0.458267
														Vmn2r9	0.490819	1.40185	0.309079		AI506816	10.5603	4.54979e-26	9.92062e-25	0.906306
														Slfn2	0.491105	1.03221	0.308826		Tmem223	10.5581	4.65923e-26	1.01488e-24	0.505981
														Fgfbp1	0.491113	0.638936	0.308818		Psd3	10.5578	4.67604e-26	1.01748e-24	0.476287
														Rasd1	0.493593	0.970489	0.306631		Proser2	10.5572	4.70417e-26	1.02255e-24	0.829453
														Klhl15	0.49367	0.552325	0.306563		Itgb1bp1	10.5533	4.90317e-26	1.06471e-24	0.638208
														Klkb1	0.496351	1.23735	0.304211		Cfl2	10.5518	4.98228e-26	1.08078e-24	0.508112
														Man2a1	0.497749	0.188925	0.30299		Zfp664	10.5517	4.9878e-26	1.08086e-24	0.530608
														Dll1	0.498815	1.50355	0.30206		Ift43	10.5405	5.61954e-26	1.21651e-24	0.579925
														Socs3	0.499833	0.397347	0.301175		Ttc3	10.5403	5.63328e-26	1.21823e-24	0.449668
														Fut4	0.502232	0.486212	0.299096		Xrn2	10.5335	6.05099e-26	1.30722e-24	0.459419
														Gm43305	0.505184	0.761035	0.29655		Cwc27	10.5314	6.18876e-26	1.33562e-24	0.593277
														Csf2	0.50576	1.25056	0.296055		Psenen	10.5295	6.31888e-26	1.36231e-24	0.457669
														Duoxa1	0.507249	4.37409	0.294779		Tln2	10.5261	6.54981e-26	1.41065e-24	0.536083
														Mthfd1	0.507701	0.147009	0.294392		Mrpl51	10.5219	6.84524e-26	1.47277e-24	0.465629
														Gm12703	0.508235	0.554134	0.293936		Dmkn	10.5206	6.9413e-26	1.49192e-24	0.798185
														Dock7	0.50933	0.145299	0.293001		Timm44	10.5187	7.08676e-26	1.52008e-24	0.660772
														Prkar2a	0.509563	0.221955	0.292802		Epb41l2	10.5177	7.16045e-26	1.53433e-24	0.851371
														Ccl9	0.511794	2.41607	0.290905		Mpp7	10.5054	8.15934e-26	1.74482e-24	0.452101
														Glipr2	0.513465	0.541612	0.289489		Cope	10.5045	8.23273e-26	1.75873e-24	0.45173
														D630024D03Rik	0.514882	1.49615	0.288293		Timm10b	10.5005	8.59422e-26	1.8341e-24	0.448163
														Tox2	0.516351	1.55694	0.287055		Tmem131l	10.4996	8.67428e-26	1.84931e-24	0.626341
														Traf1	0.516788	0.375673	0.286688		Zfand3	10.4992	8.70898e-26	1.85484e-24	0.448488
														Chd7	0.517848	0.289147	0.285798		Grn	10.4894	9.65951e-26	2.0552e-24	0.571749
														Hspb2	0.521199	0.645993	0.282996		Polr2j	10.4881	9.79375e-26	2.08167e-24	0.482595
														Rap1b	0.522224	0.0246084	0.282143		Smarca5	10.482	1.04467e-25	2.21597e-24	0.455958
														E2f2	0.525446	0.48642	0.279472		Cbr1	10.4797	1.07083e-25	2.26692e-24	0.574291
														Pcdhga10	0.527041	0.637995	0.278155		Mta3	10.4794	1.07408e-25	2.27151e-24	0.538024
														1700049E15Rik	0.527449	0.378377	0.277819		Cpne8	10.4766	1.10633e-25	2.33738e-24	0.605516
														Ext1	0.531188	0.0199151	0.274752		Dnttip2	10.473	1.14961e-25	2.42639e-24	0.530589
														Osbpl9	0.532086	0.0513133	0.274018		Chchd1	10.4689	1.20033e-25	2.53089e-24	0.459698
														Reck	0.533324	0.732212	0.273009		Lsr	10.4681	1.21031e-25	2.54939e-24	0.545063
														H2-T23	0.534768	0.365063	0.271834		Brix1	10.4598	1.32142e-25	2.78065e-24	0.618851
														Lgals4	0.539257	1.18051	0.268204		Med28	10.4571	1.36022e-25	2.85945e-24	0.554694
														Tet1	0.540529	1.1628	0.267181		Dph3	10.455	1.39065e-25	2.92051e-24	0.591699
														Parp12	0.540578	0.452802	0.267142		Ddx1	10.4527	1.42403e-25	2.98466e-24	0.553292
														Folr1	0.542779	1.4871	0.265377		Selenom	10.4524	1.42892e-25	2.99194e-24	1.51185
														Xlr5a	0.543147	1.6168	0.265083		Hhex	10.4451	1.54297e-25	3.22433e-24	1.02944
														Dock1	0.545405	0.0108791	0.263281		Hbp1	10.4421	1.59279e-25	3.32514e-24	0.489117
														Epsti1	0.546892	0.531563	0.262099		Dpy30	10.4413	1.60615e-25	3.34972e-24	0.507783
														Marveld1	0.548505	0.318777	0.26082		Tgif1	10.4411	1.61019e-25	3.35482e-24	0.935004
														Nos1ap	0.549565	0.0378337	0.259981		Smyd2	10.4407	1.61615e-25	3.36392e-24	1.07529
														Fxyd2	0.550354	1.52677	0.259358		Hspa1b	10.411	2.20813e-25	4.59156e-24	0.779648
														Magi3	0.550745	0.0365488	0.259049		R3hdm4	10.4016	2.43904e-25	5.06672e-24	0.525417
														Kcnh6	0.550968	2.60987	0.258874		Nvl	10.3982	2.5256e-25	5.24137e-24	0.659935
														Mfsd7a	0.553541	0.852619	0.256851		Nt5c	10.3973	2.55099e-25	5.28885e-24	0.573246
														Ly75	0.555003	0.516783	0.255704		Tmem208	10.3961	2.58167e-25	5.3472e-24	0.44843
														Parp14	0.555596	0.366698	0.255241		Eif3j1	10.3907	2.73331e-25	5.65572e-24	0.454745
														Plxna2	0.555805	0.118264	0.255077		Supt16	10.3862	2.86435e-25	5.92106e-24	0.49498
														Ttll8	0.557108	1.63064	0.254061		Cgn	10.3802	3.05162e-25	6.302e-24	0.582858
														Tapbp	0.557984	0.23225	0.253378		Gm15283	10.3791	3.08532e-25	6.36536e-24	1.23756
														Serpinb1a	0.558529	2.99065	0.252954		Bad	10.378	3.12109e-25	6.43286e-24	0.582093
														Il15ra	0.561499	0.693155	0.250651		Schip1	10.3756	3.20329e-25	6.59584e-24	0.918066
														Grk3	0.562156	0.0948534	0.250143		Atp11b	10.3749	3.22487e-25	6.6338e-24	0.480693
														Trim30d	0.570338	0.465902	0.243868		Leprotl1	10.3746	3.2363e-25	6.65082e-24	0.638348
														C430049B03Rik	0.571919	1.55039	0.242665		Cyb5r3	10.3723	3.31489e-25	6.8057e-24	0.442095
														Klf4	0.572409	0.451724	0.242294		Naaladl2	10.3649	3.58064e-25	7.34414e-24	0.50077
														Itga5	0.573258	0.489672	0.24165		Rad21	10.3616	3.70778e-25	7.59752e-24	0.485078
														Gm16083	0.574935	0.447822	0.240381		Acbd5	10.3591	3.80631e-25	7.79186e-24	0.490892
														St3gal6	0.576383	0.170827	0.239289		Mrpl53	10.3514	4.12317e-25	8.42414e-24	0.485205
														Trdmt1	0.578541	0.788737	0.237666		Tbca	10.3458	4.3728e-25	8.9255e-24	0.454326
														Slc52a3	0.580047	0.69928	0.236537		Gm16599	10.3456	4.37953e-25	8.9306e-24	0.631366
														Cacna1b	0.58111	3.33149	0.235742		Prkar1a	10.3432	4.4929e-25	9.15292e-24	0.45273
														Gm30648	0.584978	0.721114	0.23286		2900026A02Rik	10.3423	4.53659e-25	9.23301e-24	0.549116
														Plxnb2	0.585607	0.12553	0.232394		Cdc5l	10.3408	4.60563e-25	9.36448e-24	0.492043
														Gm49643	0.587715	1.55513	0.230833		Runx1	10.3405	4.62273e-25	9.39021e-24	0.486901
														4933421A08Rik	0.587793	1.02577	0.230776		Syne2	10.3376	4.76081e-25	9.65208e-24	0.545003
														Il7	0.590213	0.468499	0.228991		Pak1ip1	10.3284	5.24176e-25	1.0617e-23	0.594331
														Npr1	0.591074	0.409147	0.228358		Arid4a	10.3283	5.24982e-25	1.06231e-23	0.513137
														Gm33677	0.591936	4.89707	0.227725		Ppp1r10	10.3258	5.38938e-25	1.0895e-23	0.50191
														Sfmbt1	0.59356	0.264802	0.226535		Desi2	10.3255	5.40644e-25	1.0919e-23	0.472222
														Ccnj	0.594529	0.523586	0.225827		Ero1l	10.3203	5.70479e-25	1.15106e-23	0.9565
														Tnfsf10	0.595541	1.26491	0.225089		Chic2	10.3195	5.75158e-25	1.15939e-23	0.557447
														Msl3l2	0.596334	0.654705	0.224511		Prr13	10.3164	5.93961e-25	1.19615e-23	0.503917
														St7	0.597726	0.318103	0.223498		Fam234a	10.3107	6.30422e-25	1.26836e-23	0.641911
														Fbxo9	0.600595	0.258486	0.221418		Polr2g	10.305	6.6898e-25	1.34466e-23	0.516764
														Duox1	0.602266	3.33713	0.220212		Ndufa13	10.3044	6.73062e-25	1.35157e-23	0.362613
														Gm44751	0.603244	0.553696	0.219507		Dnaja2	10.303	6.83113e-25	1.37045e-23	0.450763
														Plet1	0.603444	0.185552	0.219363		Cuta	10.3001	7.03855e-25	1.41072e-23	0.457143
														Usf3	0.604045	0.233068	0.218931		Tomm7	10.3	7.04775e-25	1.41096e-23	0.422368
														Cyb5a	0.60569	0.0157364	0.21775		Gm11361	10.2999	7.05315e-25	1.41096e-23	1.25973
														Prss35	0.605983	0.903615	0.217539		Rsu1	10.2969	7.27773e-25	1.45451e-23	0.504377
														Abcd1	0.60599	0.407793	0.217535		Ghitm	10.2957	7.36574e-25	1.47071e-23	0.486397
														Tspan9	0.60671	0.127854	0.217019		Akr1c13	10.2941	7.49554e-25	1.49521e-23	1.31693
														P2rx5	0.608428	0.632537	0.215791		Zfp36l2	10.2936	7.52935e-25	1.50053e-23	0.738232
														Exoc3l	0.610519	1.04724	0.214301		Ahr	10.2718	9.44672e-25	1.88087e-23	0.833829
														Ttc7b	0.611527	0.58297	0.213584		Znhit1	10.2669	9.93358e-25	1.97594e-23	0.521324
														D630039A03Rik	0.612059	0.566908	0.213207		Sf3b6	10.2667	9.95904e-25	1.97914e-23	0.486512
														Dcpp3	0.61243	2.14002	0.212944		Tcerg1	10.2654	1.00882e-24	2.00291e-23	0.554721
														Cpped1	0.613069	0.359222	0.212491		Anxa7	10.2643	1.02043e-24	2.02407e-23	0.583255
														Epm2a	0.61358	0.696948	0.212129		Gm9844	10.2632	1.03195e-24	2.04498e-23	0.799272
														Tcim	0.61389	0.111754	0.211909		Esf1	10.2611	1.05489e-24	2.08849e-23	0.553929
														Fkbp15	0.616273	0.28868	0.210227		Ap1s1	10.259	1.07863e-24	2.13149e-23	0.647885
														Snx19	0.616825	0.420457	0.209838		Puf60	10.259	1.07863e-24	2.13149e-23	0.505584
														Tspan15	0.617151	0.383388	0.209608		Shoc2	10.2559	1.11309e-24	2.19752e-23	0.609444
														Wnt4	0.622387	0.806184	0.205939		Emc3	10.2557	1.11574e-24	2.20069e-23	0.523759
														Gm20554	0.625149	0.915128	0.204016		Scamp3	10.2553	1.12055e-24	2.20812e-23	0.695779
														Agr3	0.62556	6.08014	0.203731		Wdr12	10.2507	1.1751e-24	2.31344e-23	0.940149
														Gm16033	0.625714	0.529529	0.203624		Mrpl9	10.2489	1.19657e-24	2.35352e-23	0.749844
														Col16a1	0.627655	0.890384	0.202279		Mtcl1	10.2482	1.20567e-24	2.36921e-23	0.461188
														Nfkbie	0.628543	0.898011	0.201665		Rex1bd	10.2425	1.27833e-24	2.50965e-23	0.46941
														Guca2a	0.629688	1.12946	0.200875		Junb	10.2374	1.3483e-24	2.64456e-23	0.482699
														Hepacam	0.632096	1.08389	0.199217		Mmp14	10.2326	1.4161e-24	2.77495e-23	0.853248
														Hebp1	0.632556	0.561667	0.198901		Atp5a1	10.2285	1.47759e-24	2.89276e-23	0.382667
														Rgn	0.632577	1.38786	0.198886		Mtus1	10.2253	1.52704e-24	2.9868e-23	0.563029
														Il18bp	0.636882	0.602347	0.195941		Hist1h1e	10.2236	1.5546e-24	3.03788e-23	0.591609
														Per3	0.637532	0.442304	0.195498		Ppp2r5c	10.2217	1.58527e-24	3.09495e-23	0.490933
														Zbp1	0.64128	0.753227	0.192952		Rcc2	10.2166	1.67179e-24	3.26085e-23	0.665112
														Maf	0.642385	1.02453	0.192205		Ndufa6	10.2042	1.89836e-24	3.69935e-23	0.403076
														Zfp445	0.643583	0.219941	0.191395		Glo1	10.1946	2.09645e-24	4.08159e-23	0.493067
														Uba7	0.643602	0.515909	0.191383		Gnai1	10.1917	2.15992e-24	4.20129e-23	0.869125
														C630043F03Rik	0.643639	0.627699	0.191358		AU021092	10.1675	2.76859e-24	5.38026e-23	0.683328
														Ces1b	0.643916	1.70544	0.191171		Arrdc1	10.1662	2.80727e-24	5.4504e-23	0.487033
														Ccp110	0.644422	0.429159	0.19083		Ddx39	10.163	2.90091e-24	5.62702e-23	1.01013
														Mlxipl	0.644652	0.714065	0.190675		2210016L21Rik	10.1589	3.02333e-24	5.85909e-23	0.577556
														Gm32200	0.644658	0.504746	0.19067		Psma6	10.1557	3.12535e-24	6.05124e-23	0.466891
														Xlr5b	0.645349	6.2539	0.190206		Ywhab	10.1472	3.4112e-24	6.59865e-23	0.432148
														Sema3b	0.646328	0.428271	0.189547		Atxn3	10.1464	3.43811e-24	6.64459e-23	0.778228
														D16Ertd472e	0.647038	0.421736	0.18907		Chmp4b	10.1452	3.48141e-24	6.72211e-23	0.440222
														Gm48882	0.648056	0.548263	0.188387		Net1	10.1429	3.56441e-24	6.87608e-23	0.570386
														Gdf11	0.650288	0.925415	0.186894		Zfp64	10.1396	3.68564e-24	7.10345e-23	1.01298
														Gm26740	0.65353	1.58996	0.184735		Sumo1	10.1354	3.84814e-24	7.40988e-23	0.427627
														Ccrl2	0.654499	1.50006	0.184091		Ufc1	10.1339	3.90676e-24	7.51588e-23	0.468983
														Manf	0.655779	0.0959507	0.183243		Gm14164	10.1332	3.93596e-24	7.56515e-23	0.829408
														Creg1	0.657019	0.0240693	0.182422		Atic	10.1251	4.27521e-24	8.20973e-23	0.922385
														Tmem28	0.659018	0.579901	0.181102		Agpat5	10.1244	4.30714e-24	8.26351e-23	0.807822
														Ccdc69	0.661492	1.21467	0.179476		Asxl2	10.124	4.32243e-24	8.2853e-23	0.482499
														Zfp583	0.662582	0.876221	0.17876		Tead1	10.122	4.41352e-24	8.45224e-23	0.440969
														Ltbp4	0.662818	0.838473	0.178606		Mettl9	10.1148	4.74917e-24	9.07854e-23	0.830975
														Zc3h12c	0.663692	0.370273	0.178033		Ndufa8	10.109	5.04007e-24	9.6259e-23	0.464628
														Myadml2os	0.664793	1.63459	0.177313		Mcph1	10.1087	5.05592e-24	9.64743e-23	1.02538
														Fbxo2	0.664938	0.598318	0.177219		Sys1	10.106	5.19529e-24	9.9044e-23	0.48225
														Nacad	0.665435	0.421949	0.176894		Cdc73	10.1008	5.47972e-24	1.04372e-22	0.46439
														Slc41a2	0.666245	0.729518	0.176366		Acyp2	10.0975	5.66583e-24	1.07819e-22	0.743226
														Zfp185	0.66639	0.730203	0.176272		Usp14	10.0899	6.1237e-24	1.16428e-22	0.483191
														Gm20647	0.671577	1.50533	0.172904		Psmd8	10.0882	6.2281e-24	1.18306e-22	0.47812
														A530076I17Rik	0.674518	1.4751	0.171007		Mrpl24	10.0865	6.33649e-24	1.20256e-22	0.503978
														Cib2	0.675015	0.521596	0.170687		Rbm17	10.0834	6.54215e-24	1.24008e-22	0.656605
														Pced1b	0.675598	0.413027	0.170312		Yipf3	10.0833	6.54591e-24	1.24008e-22	0.486326
														Cdh4	0.677566	0.959834	0.169049		Sumo2	10.082	6.63866e-24	1.25652e-22	0.442659
														Clpx	0.677737	0.248353	0.168939		Map4k4	10.08	6.77561e-24	1.28129e-22	0.476903
														Gm5086	0.678358	0.369178	0.168541		Frrs1	10.0782	6.89587e-24	1.30286e-22	1.7258
														Car4	0.679152	0.457372	0.168033		Ap1g1	10.0723	7.32413e-24	1.38254e-22	0.439911
														1700001K19Rik	0.680209	0.702582	0.167358		Ndufb9	10.0554	8.69731e-24	1.64027e-22	0.360816
														Galntl6	0.6856	1.1994	0.163929		Eif2a	10.0535	8.86299e-24	1.67003e-22	0.584337
														Cdx1	0.685689	6.23356	0.163873		Ppip5k2	10.0531	8.90597e-24	1.67663e-22	0.744086
														Gm15634	0.688054	0.816129	0.162378		Brk1	10.0478	9.39346e-24	1.76682e-22	0.441407
														Atxn7l3b	0.688564	-0.00531303	0.162056		Kxd1	10.0457	9.59923e-24	1.80392e-22	0.522989
														Fzd8	0.690645	0.616524	0.160745		Sin3b	10.0453	9.63134e-24	1.80834e-22	0.50219
														Grik4	0.692934	2.37938	0.159308		Rabl6	10.0423	9.93176e-24	1.86309e-22	0.50932
														Spi1	0.693656	1.26044	0.158856		Ddb1	10.0392	1.02509e-23	1.92125e-22	0.463323
														Dock2	0.693868	1.69467	0.158723		Aco1	10.0344	1.07629e-23	2.01542e-22	0.485763
														Gm48427	0.694063	2.23294	0.158601		Dpp4	10.0324	1.09815e-23	2.05453e-22	0.452785
														F7	0.695833	0.595471	0.157495		Mybbp1a	10.0313	1.11095e-23	2.07663e-22	0.54676
														Mtss1	0.696374	0.0386714	0.157157		Hmbox1	10.0291	1.13594e-23	2.12147e-22	0.51938
														Cyp2r1	0.697871	0.957465	0.156225		Sbds	10.0282	1.14575e-23	2.1379e-22	0.45754
														Tmem178	0.698301	1.2265	0.155958		Cox6b1	10.0272	1.15758e-23	2.15652e-22	0.327564
														Gm14569	0.701157	1.04898	0.154185		Snrpf	10.0272	1.15778e-23	2.15652e-22	0.46756
														Gm44148	0.701992	0.650215	0.153668		Arpc4	10.0253	1.18019e-23	2.19632e-22	0.459343
														Gata3	0.702828	2.15934	0.153151		Ndufs3	10.0139	1.32441e-23	2.46037e-22	0.472854
														Cmtm6	0.703255	0.348172	0.152887		Zc3h15	10.0125	1.34334e-23	2.49334e-22	0.435501
														Dipk2a	0.703837	0.439364	0.152528		Cdc37	10.0088	1.39503e-23	2.587e-22	0.453303
														Ikzf1	0.704301	1.15227	0.152242		Cldn6	10.0038	1.4661e-23	2.71402e-22	2.44806
														Gm10248	0.704609	1.48807	0.152052		Fam117b	9.99895	1.54015e-23	2.8486e-22	0.474371
														Kcnma1	0.705086	1.1972	0.151758		Pdcd10	9.99061	1.67542e-23	3.09607e-22	0.458286
														Trim31	0.705327	1.73121	0.151609		Fkbp11	9.98976	1.6899e-23	3.12011e-22	0.64502
														Csf1r	0.705543	1.72789	0.151477		2025-09-11	9.98679	1.74126e-23	3.21211e-22	0.530694
														Tmco4	0.705836	0.303854	0.151296		Borcs8	9.98466	1.7791e-23	3.27904e-22	0.628551
														Tcf12	0.706106	0.0381136	0.15113		Gtf3c6	9.98362	1.79777e-23	3.31056e-22	0.526185
														Ntn3	0.706976	0.822575	0.150596		Arfgef1	9.9753	1.95507e-23	3.59396e-22	0.424524
														Sipa1l3	0.707069	0.14803	0.150538		Igf2r	9.96988	2.06485e-23	3.79246e-22	0.458163
														Trpv2	0.707475	1.32902	0.150289		Tmem213	9.96884	2.08649e-23	3.82887e-22	0.793883
														Cldn34c1	0.707504	0.97297	0.150271		Chordc1	9.96857	2.09214e-23	3.8359e-22	0.470707
														Mob3c	0.708858	0.454005	0.149441		Slc25a24	9.96657	2.13482e-23	3.91074e-22	1.00712
														Aacs	0.709196	0.444567	0.149234		Mrps18b	9.96534	2.16133e-23	3.95587e-22	0.811582
														Snx29	0.709477	0.136426	0.149062		Rangap1	9.96024	2.27522e-23	4.16071e-22	0.725003
														Zfp809	0.712398	0.273103	0.147277		Psmc1	9.95656	2.36097e-23	4.31378e-22	0.51032
														Sema6b	0.712915	0.75598	0.146962		Ech1	9.9484	2.56262e-23	4.67535e-22	0.5005
														Dnah8	0.714298	1.56473	0.146121		Rnf5	9.94838	2.56329e-23	4.67535e-22	0.646708
														Gpr157	0.714376	2.97503	0.146073		Fubp1	9.9372	2.86767e-23	5.226e-22	0.435818
														Col7a1	0.715731	0.834526	0.14525		Hsd17b12	9.93635	2.89234e-23	5.2664e-22	0.454447
														Trim56	0.716019	0.253692	0.145076		Cotl1	9.93211	3.01809e-23	5.49063e-22	0.828452
														Tnfrsf11a	0.717064	0.489243	0.144442		Nfkbil1	9.93036	3.07141e-23	5.58282e-22	0.78367
														Plxnc1	0.718087	0.774283	0.143823		Qpct	9.92817	3.13955e-23	5.70176e-22	2.10007
														Clps	0.719426	2.04801	0.143014		Dbndd2	9.92793	3.14733e-23	5.71097e-22	0.679108
														Slc9a9	0.72143	0.85141	0.141806		Prdx4	9.92585	3.21365e-23	5.82629e-22	0.473766
														Espn	0.72153	0.743324	0.141746		Ufsp2	9.92369	3.28391e-23	5.94856e-22	0.579075
														Stk26	0.721712	0.473604	0.141636		Cebpzos	9.92294	3.30867e-23	5.98827e-22	0.660913
														AI463229	0.723094	0.591666	0.140805		Capn2	9.92083	3.37953e-23	6.11126e-22	0.601371
														Spaar	0.725667	0.392729	0.139262		Kdsr	9.9195	3.42472e-23	6.18768e-22	0.57405
														Nes	0.725703	0.879533	0.139241		Pkib	9.91926	3.43275e-23	6.19689e-22	1.08791
														Polg	0.726071	0.382727	0.139021		Cdc42ep5	9.91819	3.47006e-23	6.25887e-22	1.01287
														Ust	0.726301	0.386648	0.138883		Gpx2	9.91372	3.62867e-23	6.53935e-22	1.27093
														Wfdc21	0.72636	0.968959	0.138848		Adnp	9.91155	3.70855e-23	6.67761e-22	0.447046
														Cd55b	0.726389	1.10205	0.138831		Mien1	9.90648	3.90139e-23	7.01884e-22	0.431672
														Cstdc2	0.726392	1.38756	0.138829		Maml2	9.90016	4.15622e-23	7.47093e-22	0.465789
														Rapgef3	0.729126	1.1165	0.137198		Tpm2	9.89786	4.25257e-23	7.63606e-22	1.89198
														Jak1	0.730442	0.15165	0.136415		Gtpbp4	9.8978	4.25533e-23	7.63606e-22	0.527859
														Rhbdf2	0.730507	0.394737	0.136376		St3gal5	9.89585	4.33889e-23	7.77938e-22	0.556695
														Vwa3a	0.730826	1.09889	0.136186		Mrpl13	9.89047	4.57859e-23	8.20217e-22	0.541771
														Myd88	0.732942	0.456829	0.134931		Gm10131	9.88123	5.02122e-23	8.98747e-22	0.683927
														Adam22	0.734123	0.178398	0.134231		Polr1c	9.87967	5.10021e-23	9.11733e-22	0.438037
														E330011O21Rik	0.734648	0.801412	0.133921		Capzb	9.87962	5.10242e-23	9.11733e-22	0.452262
														Mb21d2	0.734949	0.49921	0.133743		2310009B15Rik	9.87835	5.16769e-23	9.22614e-22	0.78288
														Lsp1	0.73519	1.38126	0.1336		Cyth2	9.8772	5.22723e-23	9.32454e-22	0.711399
														Pnmal2	0.735376	2.66542	0.13349		Zmynd8	9.87601	5.28973e-23	9.42806e-22	0.488559
														Zfp984	0.735539	0.433276	0.133394		Nsfl1c	9.86884	5.68183e-23	1.01184e-21	0.597889
														Gm13944	0.738343	0.392998	0.131742		Maea	9.86422	5.94974e-23	1.05865e-21	0.482725
														C330007P06Rik	0.739213	0.309346	0.131231		Csad	9.86116	6.13357e-23	1.09044e-21	0.605678
														Fxyd6	0.739425	0.736157	0.131106		Efna1	9.86091	6.14921e-23	1.0923e-21	0.687189
														Gm34408	0.741029	2.21116	0.130165		Pgap2	9.85975	6.2202e-23	1.10315e-21	0.475062
														Rflnb	0.74191	0.297162	0.129649		Supt4a	9.85975	6.22074e-23	1.10315e-21	0.464827
														Slc24a3	0.742594	0.541013	0.129249		Pfkp	9.85238	6.69377e-23	1.18603e-21	1.58306
														Kmt2c	0.742902	0.0631411	0.129069		Exoc6b	9.84883	6.93434e-23	1.22763e-21	0.402234
														A330041J22Rik	0.743131	0.428755	0.128934		Sel1l3	9.84798	6.99347e-23	1.23706e-21	0.571527
														Atp13a5	0.743639	0.541557	0.128638		Setdb1	9.84265	7.37412e-23	1.3033e-21	0.623651
														Lrrc10b	0.743688	0.423673	0.128609		Eif3l	9.84193	7.42704e-23	1.31155e-21	0.533804
														Mtfr1l	0.744767	0.232943	0.12798		Lrrk1	9.83829	7.70065e-23	1.35873e-21	0.426189
														Cat	0.745403	0.027853	0.127609		Baz1a	9.82983	8.3763e-23	1.47548e-21	0.709783
														Ripor2	0.745419	1.06164	0.127599		Sytl5	9.82672	8.63831e-23	1.52036e-21	0.855908
														Gpr155	0.746115	0.621814	0.127194		Hook2	9.82588	8.71106e-23	1.53188e-21	0.5886
														Zfp580	0.746282	0.675392	0.127097		Plcd3	9.82461	8.82113e-23	1.54995e-21	0.869819
														Gm15856	0.746623	2.04368	0.126898		Acbd3	9.82038	9.19954e-23	1.61509e-21	0.449331
														Endou	0.747322	2.62242	0.126492		Pnkd	9.81091	1.01054e-22	1.77265e-21	0.469871
														Gm15879	0.747447	0.705856	0.12642		Galnt11	9.81034	1.01624e-22	1.77968e-21	0.701477
														Gm26787	0.748616	0.836516	0.125741		Mtmr7	9.80847	1.03526e-22	1.8115e-21	1.34949
														Alpk2	0.749641	0.736862	0.125147		Dctn3	9.80833	1.03664e-22	1.81241e-21	0.430493
														Cd68	0.752889	0.568663	0.123269		Cystm1	9.80513	1.0701e-22	1.86935e-21	0.395085
														Serpinf1	0.75329	0.303372	0.123038		Srpk1	9.80499	1.07162e-22	1.87045e-21	0.507672
														Fnip2	0.754146	0.200043	0.122545		Galnt2	9.80293	1.09368e-22	1.90739e-21	0.453918
														Slc4a5	0.754186	0.411928	0.122522		Nlrc4	9.78453	1.31202e-22	2.28063e-21	0.46412
														B230303O12Rik	0.755233	0.832692	0.121919		Nt5e	9.78235	1.34059e-22	2.32836e-21	1.49866
														Pccb	0.755572	0.343039	0.121724		Chchd4	9.77629	1.42333e-22	2.468e-21	0.584486
														Idh2	0.756695	0.0964791	0.121079		Cks2	9.77527	1.43777e-22	2.491e-21	1.29837
														Gm20513	0.756801	0.772868	0.121019		Cttn	9.76932	1.52474e-22	2.63951e-21	0.573434
														9530018F02Rik	0.758211	0.860319	0.12021		Rai14	9.76899	1.52977e-22	2.64604e-21	0.38708
														Baiap2l2	0.758412	0.949921	0.120095		Dnajc2	9.76683	1.56263e-22	2.70066e-21	0.561835
														4930449E18Rik	0.759686	2.28165	0.119366		Gpc6	9.76508	1.58978e-22	2.74534e-21	0.945353
														Pard3	0.760477	-0.0300355	0.118914		Znhit6	9.76125	1.65113e-22	2.84895e-21	0.779172
														Cntln	0.760507	0.36397	0.118897		Tmem63b	9.75789	1.70672e-22	2.94245e-21	0.436551
														Xlr4b	0.761233	1.08163	0.118482		Srp9	9.75642	1.73161e-22	2.98292e-21	0.425206
														Plekhg5	0.761699	0.465043	0.118217		Id3	9.75241	1.80137e-22	3.10056e-21	0.92125
														Acss1	0.762495	0.279453	0.117763		Top2b	9.7487	1.86848e-22	3.21346e-21	0.424068
														C230037L18Rik	0.763519	1.11072	0.11718		Sub1	9.74394	1.9581e-22	3.36483e-21	0.396782
														Otulinl	0.763776	1.61852	0.117034		Ssb	9.74195	1.99689e-22	3.42871e-21	0.426239
														1700019D03Rik	0.764424	0.579568	0.116666		Uqcrh	9.73988	2.03784e-22	3.49616e-21	0.340147
														4933417O13Rik	0.765092	0.817423	0.116286		Abracl	9.73819	2.07218e-22	3.55219e-21	0.458443
														Gm50012	0.76613	1.22477	0.115697		Cmtm4	9.73513	2.13549e-22	3.65774e-21	0.489682
														Ifi47	0.768364	0.700784	0.114433		Hax1	9.73172	2.20831e-22	3.7794e-21	0.919107
														H60c	0.76996	1.16589	0.113532		Smad4	9.73135	2.21632e-22	3.79004e-21	0.429001
														Epb41	0.770384	0.165487	0.113293		Rarb	9.73111	2.22152e-22	3.79585e-21	1.25445
														Gabre	0.770719	0.54989	0.113104		Ubap2	9.72988	2.24846e-22	3.83878e-21	0.46285
														Dmxl2	0.772223	0.981366	0.112257		Ssr2	9.72933	2.26076e-22	3.85483e-21	0.43305
														Sspn	0.772485	0.699367	0.11211		Zdhhc20	9.7293	2.26153e-22	3.85483e-21	0.439055
														Coro1a	0.772681	1.1275	0.112		Gstk1	9.72738	2.3045e-22	3.92491e-21	0.554449
														Klhdc7a	0.772847	0.519814	0.111907		Osbpl6	9.72526	2.35299e-22	4.00425e-21	0.546139
														Chad	0.774512	1.72711	0.110972		Vti1b	9.72109	2.45134e-22	4.16826e-21	0.44776
														Teddm2	0.775122	1.00756	0.11063		Tmem165	9.71813	2.52384e-22	4.28808e-21	0.446345
														Fam53b	0.775285	0.358085	0.110539		Ppp1r11	9.71789	2.52964e-22	4.29448e-21	0.443607
														Arhgap15	0.776012	1.33302	0.110132		Plec	9.71775	2.5333e-22	4.29724e-21	0.492423
														Itgax	0.776802	2.14976	0.10969		Ufm1	9.71532	2.59426e-22	4.39711e-21	0.538448
														Sla	0.776835	2.1532	0.109671		Ccnd3	9.7136	2.63855e-22	4.46858e-21	0.41356
														Slc9b1	0.776842	1.76583	0.109667		Emc8	9.71329	2.64664e-22	4.47868e-21	0.643558
														Itga4	0.776909	1.87447	0.10963		Mrpl2	9.71092	2.70868e-22	4.58e-21	0.514736
														Prelp	0.777616	2.32014	0.109235		Pdcd6	9.71065	2.71606e-22	4.5888e-21	0.505289
														Pcca	0.778304	0.149237	0.108851		Ik	9.70881	2.76546e-22	4.66851e-21	0.453149
														Dock10	0.779324	1.25181	0.108282		Eif1ax	9.6996	3.02687e-22	5.10572e-21	0.466608
														Tmem198	0.779377	0.769855	0.108252		Lamtor5	9.69803	3.07375e-22	5.18066e-21	0.463143
														Gm2115	0.780797	0.719649	0.107462		Abcc5	9.69547	3.15198e-22	5.30827e-21	0.620119
														Clca1	0.781499	1.5471	0.107072		Zmat4	9.6931	3.22574e-22	5.42814e-21	1.09566
														Itih1	0.782128	0.630141	0.106722		Cnot3	9.69027	3.3165e-22	5.57643e-21	0.478215
														Tcf7	0.784431	1.32976	0.105445		Wdr60	9.68821	3.38401e-22	5.6854e-21	0.78391
														Gjb2	0.78543	0.575752	0.104892		Mxi1	9.68794	3.39306e-22	5.69607e-21	1.34374
														Mtmr1	0.786113	0.418708	0.104515		Psmd12	9.68759	3.40459e-22	5.71089e-21	0.44523
														Rnf145	0.786517	0.251685	0.104292		Atg101	9.68423	3.51864e-22	5.8975e-21	0.729176
														Cacna1s	0.78687	0.849065	0.104097		Gtf3a	9.68257	3.57609e-22	5.98903e-21	0.612159
														Rasl10a	0.786963	1.15123	0.104046		Eif5b	9.67819	3.73265e-22	6.23636e-21	0.396569
														Slc36a2	0.78717	3.40716	0.103932		Ost4	9.67625	3.80401e-22	6.35056e-21	0.41651
														Capn11	0.788127	1.05424	0.103404		Ssna1	9.67586	3.81854e-22	6.36978e-21	0.502155
														Cd84	0.78821	1.9079	0.103358		Nol12	9.67538	3.83654e-22	6.39474e-21	0.824647
														Tnfsf13b	0.788517	0.684355	0.103189		Atxn7l1	9.67509	3.84761e-22	6.40812e-21	0.468784
														H2-Eb2	0.789264	0.823086	0.102778		Nr6a1	9.67476	3.86001e-22	6.42371e-21	0.421521
														Dcpp1	0.790011	1.52666	0.102367		Agfg1	9.6731	3.92298e-22	6.52334e-21	0.462771
														Wfdc17	0.791446	1.12285	0.101578		Clybl	9.67007	4.04083e-22	6.71401e-21	0.787089
														C130013H08Rik	0.79176	0.543293	0.101406		Arhgap24	9.66937	4.06863e-22	6.7549e-21	0.550501
														Mkln1	0.792491	0.0204293	0.101005		Stam2	9.66369	4.30095e-22	7.13497e-21	0.588226
														Msantd3	0.792889	0.655549	0.100788		Elof1	9.66197	4.37379e-22	7.25011e-21	0.476823
														Gm41144	0.793002	2.68743	0.100725		Pcbd1	9.65603	4.63488e-22	7.67686e-21	0.545324
														Ihh	0.793029	2.75748	0.100711		Arhgdig	9.65551	4.65826e-22	7.70953e-21	1.49174
														Ncf4	0.793223	1.83386	0.100605		Sh3glb1	9.65492	4.68512e-22	7.7479e-21	0.439672
														Creb3l4	0.793527	0.711262	0.100438		Gatad1	9.65322	4.76359e-22	7.8715e-21	0.459684
														Dapk1	0.794192	-0.0326971	0.100075		Hnf4a	9.64942	4.94344e-22	8.16229e-21	0.981573
														Pudp	0.794686	0.460705	0.0998042		Cemip2	9.64753	5.03513e-22	8.30717e-21	0.750964
														Wfdc1	0.795977	0.584025	0.0990997		Sem1	9.64207	5.31075e-22	8.74821e-21	0.391019
														Hes2	0.796197	3.36712	0.0989793		Flna	9.64128	5.35171e-22	8.8088e-21	0.519756
														Adcy2	0.796839	1.02818	0.0986292		Ola1	9.63821	5.51405e-22	9.06893e-21	0.475665
														Sybu	0.797201	1.15292	0.0984324		Hmga1b	9.63762	5.54578e-22	9.11402e-21	1.58175
														Plvap	0.797502	1.42629	0.0982684		Banf1	9.63231	5.83992e-22	9.58993e-21	0.482666
														Gm8439	0.798833	2.31693	0.0975438		Tmem183a	9.62918	6.02071e-22	9.87912e-21	0.592826
														Apln	0.799004	0.274933	0.097451		Psat1	9.62796	6.09298e-22	9.98992e-21	1.4286
														Klk1	0.799456	4.5509	0.0972055		Atp5g1	9.62754	6.11743e-22	1.00222e-20	0.378748
														Zim1	0.800855	0.946193	0.0964459		Dnttip1	9.62584	6.21935e-22	1.01813e-20	0.64087
														Inpp5d	0.801066	1.51448	0.0963315		Usp6nl	9.62507	6.26644e-22	1.02504e-20	0.457895
														Gne	0.80174	0.277922	0.0959667		Pcmtd2	9.62279	6.40716e-22	1.04725e-20	0.584967
														Gngt2	0.802627	0.816377	0.095486		Uqcrfs1	9.62265	6.41581e-22	1.04785e-20	0.453966
														Trim36	0.803462	0.787818	0.0950347		Fbxl7	9.61655	6.80753e-22	1.11011e-20	2.44736
														Gm12002	0.803857	0.331335	0.094821		Gtf2f1	9.6019	7.84859e-22	1.27888e-20	0.607233
														Golga4	0.803928	0.0599667	0.094783		Ralgps2	9.60159	7.87172e-22	1.28166e-20	1.15788
														Thbs3	0.806936	0.235684	0.0931608		Src	9.58636	9.12512e-22	1.48459e-20	0.689348
														St6galnac6	0.80694	0.368537	0.093159		Zfp771	9.5829	9.43553e-22	1.53391e-20	0.642439
														Gpx8	0.807054	0.345079	0.0930976		Evi5	9.58217	9.50228e-22	1.54357e-20	0.450989
														Mras	0.808158	0.656935	0.0925039		Rexo2	9.57586	1.01011e-21	1.63959e-20	0.455039
														Ccr6	0.808238	1.65446	0.0924606		Psma2	9.57353	1.03316e-21	1.6757e-20	0.412134
														Chrm1	0.808591	3.55196	0.0922712		Galk1	9.57126	1.05606e-21	1.71151e-20	0.524957
														Wnt3a	0.809084	1.32319	0.0920062		Polr3k	9.56714	1.09909e-21	1.77853e-20	0.652126
														Tafa1	0.810656	0.788334	0.0911633		Ppia	9.56031	1.17408e-21	1.89843e-20	0.256222
														Upb1	0.810999	1.06899	0.0909798		Snu13	9.56012	1.17615e-21	1.89941e-20	0.418331
														Bnc2	0.8111	0.91585	0.0909258		Bckdha	9.5601	1.17649e-21	1.89941e-20	0.518776
														Traf3ip3	0.813745	2.15125	0.0895118		Ddx41	9.5579	1.20173e-21	1.93867e-20	0.665764
														Tvp23a	0.813869	0.831214	0.0894454		S100a13	9.5524	1.26732e-21	2.04292e-20	0.442682
														Lix1	0.813896	0.418464	0.0894311		Ocln	9.54956	1.30241e-21	2.09789e-20	0.711908
														Gdf5	0.813994	1.5439	0.089379		Ndufa2	9.53487	1.50069e-21	2.41358e-20	0.333539
														Tgtp2	0.813994	1.73725	0.089379		Isyna1	9.53455	1.5054e-21	2.41931e-20	0.545322
														H2-M3	0.814081	0.502915	0.0893324		Prpf40a	9.52918	1.58531e-21	2.54579e-20	0.424898
														Stra8	0.814717	1.67992	0.0889934		Fras1	9.52725	1.61502e-21	2.59153e-20	1.10648
														9530051G07Rik	0.815329	1.0967	0.0886672		Klk13	9.52693	1.62002e-21	2.59757e-20	0.94975
														Bcas3os2	0.815739	0.652481	0.0884486		Paip2	9.51928	1.74384e-21	2.79399e-20	0.381767
														Plekhd1	0.815975	0.192747	0.0883232		Atp6v1f	9.51714	1.78005e-21	2.84984e-20	0.382784
														Nxt2	0.816459	0.467805	0.0880654		Gars	9.51451	1.82573e-21	2.92076e-20	0.456351
														Apobr	0.816708	0.463485	0.087933		Ier3ip1	9.51404	1.83389e-21	2.93159e-20	0.446568
														Taf9b	0.817055	0.42729	0.0877487		1810037I17Rik	9.51128	1.88329e-21	3.00828e-20	0.407931
														Gm36199	0.81722	1.78522	0.087661		Abce1	9.50892	1.92645e-21	3.07489e-20	0.478741
														Rasl12	0.818092	0.468592	0.0871979		4833420G17Rik	9.49834	2.13257e-21	3.4013e-20	0.554856
														Lilrb4a	0.818924	1.12861	0.0867566		Laptm4b	9.49674	2.16564e-21	3.45144e-20	0.514834
														Plg	0.819823	0.827565	0.0862799		Ergic2	9.48599	2.40083e-21	3.82338e-20	0.430572
														Neto2	0.820315	0.222042	0.0860195		Gnpnat1	9.48573	2.40682e-21	3.83003e-20	0.782736
														Gm26555	0.82051	1.83915	0.085916		Slx4ip	9.48434	2.43913e-21	3.87852e-20	0.672185
														4732463B04Rik	0.820631	1.65513	0.0858518		Fam114a2	9.48391	2.44929e-21	3.8896e-20	0.473773
														Lman1l	0.82176	0.433889	0.0852548		BC003965	9.48389	2.4498e-21	3.8896e-20	0.529245
														Igsf5	0.822394	0.103588	0.08492		Mga	9.48303	2.47003e-21	3.91878e-20	0.449511
														Gm12511	0.823203	1.35651	0.0844929		E2f3	9.47826	2.58558e-21	4.09901e-20	0.876656
														Sp110	0.823534	0.467915	0.0843186		Supt3	9.47785	2.59569e-21	4.11195e-20	0.518273
														Atp2b2	0.823655	2.53237	0.0842546		Mrps14	9.47585	2.64606e-21	4.18859e-20	0.425085
														Pakap-1	0.82375	0.738025	0.0842048		Dleu2	9.47519	2.6628e-21	4.21194e-20	0.459259
														Raet1d	0.824532	0.775912	0.0837925		Mpp5	9.47415	2.68934e-21	4.25073e-20	0.435942
														Gm34983	0.824603	0.51504	0.0837552		Plxna4	9.47263	2.7288e-21	4.30987e-20	0.417121
														Gm10863	0.825612	0.873335	0.0832242		Clpp	9.4724	2.73492e-21	4.3163e-20	0.473849
														Atp6v0d2	0.825666	0.824612	0.0831958		Dhrs4	9.47108	2.76963e-21	4.36781e-20	0.550043
														Cdkn2c	0.826094	0.604556	0.0829704		Srsf11	9.46833	2.84367e-21	4.48122e-20	0.39999
														Ptprc	0.827002	1.16651	0.0824934		Nisch	9.46231	3.01211e-21	4.73958e-20	0.399929
														Laptm5	0.827198	0.906062	0.0823906		Mnat1	9.4562	3.19332e-21	5.02097e-20	0.571313
														Aff3	0.829075	1.71332	0.0814061		Mafg	9.45544	3.21669e-21	5.05059e-20	0.523535
														Fxyd4	0.829106	0.333691	0.0813901		Rhob	9.45543	3.21695e-21	5.05059e-20	0.972445
														H60b	0.829481	1.14395	0.0811938		Fbxl20	9.45109	3.3531e-21	5.26042e-20	0.459652
														Gm28905	0.829595	2.0745	0.0811337		Pias2	9.44339	3.60896e-21	5.65762e-20	0.498089
														Ifit3	0.82971	0.584254	0.0810735		Atg14	9.44052	3.70945e-21	5.81082e-20	0.765347
														Tceal1	0.830011	0.430274	0.0809162		Jagn1	9.43497	3.91119e-21	6.1223e-20	0.65247
														Usp2	0.830494	0.652992	0.0806635		Etf1	9.42487	4.30652e-21	6.73613e-20	0.432844
														Syk	0.831684	1.37017	0.0800419		Pawr	9.42475	4.31115e-21	6.73836e-20	0.417341
														Gm13166	0.831724	1.38797	0.0800207		Rtf1	9.42347	4.36415e-21	6.81616e-20	0.416647
														Gm14703	0.832539	1.22674	0.0795955		Pecr	9.42296	4.38564e-21	6.84465e-20	1.16853
														Megf11	0.832573	0.794159	0.0795779		Lyar	9.42219	4.4178e-21	6.88974e-20	0.645742
														Slc15a3	0.832586	1.21262	0.0795708		Pdlim1	9.4218	4.43406e-21	6.90998e-20	0.429609
														Gm15651	0.832786	0.895441	0.0794668		Mydgf	9.41937	4.5381e-21	7.06689e-20	0.420679
														H2afy2	0.833063	2.06881	0.0793222		Fbxl5	9.41852	4.57495e-21	7.11902e-20	0.407837
														Tpsg1	0.833411	5.13853	0.0791407		2010001K21Rik	9.41696	4.6434e-21	7.22021e-20	1.1995
														Gpr20	0.833418	5.06892	0.0791372		Ago2	9.41643	4.66702e-21	7.25159e-20	0.486027
														Gm19951	0.833742	0.391337	0.0789681		Scgb3a2	9.41583	4.69366e-21	7.28762e-20	1.6603
														Arhgef9	0.834057	0.393305	0.0788043		Mrps12	9.41223	4.8571e-21	7.53584e-20	0.426741
														Apbb1ip	0.834869	1.00369	0.0783818		Psmg2	9.41042	4.94174e-21	7.66151e-20	0.739662
														Abcb9	0.835515	0.710954	0.0780458		Nsun7	9.40786	5.06339e-21	7.83923e-20	0.589282
														Cd300lf	0.835613	1.79225	0.0779948		Eif3a	9.40785	5.06381e-21	7.83923e-20	0.39275
														Pklr	0.835806	0.429902	0.0778945		Gar1	9.40727	5.09206e-21	7.87718e-20	0.884343
														Hepacam2	0.836066	2.95614	0.0777592		Trmt10a	9.40468	5.21909e-21	8.06778e-20	1.19346
														Ptger3	0.836121	0.907737	0.0777311		Btg2	9.40338	5.28356e-21	8.16145e-20	0.492629
														Gm15230	0.836182	2.31449	0.0776994		Tspan14	9.4025	5.32836e-21	8.22463e-20	0.538281
														Gdpd1	0.836188	0.274986	0.0776959		Timp2	9.40137	5.38595e-21	8.30744e-20	0.444722
														Dync1i1	0.836242	1.70264	0.0776678		Ywhaz	9.39864	5.52728e-21	8.5192e-20	0.388739
														Gm10451	0.836364	1.35245	0.0776045		Kdm2a	9.39318	5.82151e-21	8.96615e-20	0.406648
														Rwdd2a	0.836493	1.20517	0.0775377		Ahsa2	9.39217	5.8776e-21	9.04592e-20	0.855382
														Hes7	0.837366	0.826145	0.0770846		Smarcc1	9.38792	6.11964e-21	9.41157e-20	0.421321
														Emilin1	0.837708	1.05979	0.0769073		Krtcap2	9.38747	6.14612e-21	9.44541e-20	0.373386
														Itgb3	0.838172	0.525396	0.0766669		Pip5k1a	9.38479	6.30431e-21	9.67441e-20	0.467901
														Pla2g10	0.838328	1.31315	0.0765862		Npm3	9.37612	6.84436e-21	1.04955e-19	0.612476
														Gm3587	0.838368	1.23831	0.0765652		Pum3	9.37602	6.85083e-21	1.04978e-19	0.592855
														9630013D21Rik	0.838504	1.05601	0.076495		Procr	9.37215	7.10704e-21	1.08746e-19	1.45582
														Htra1	0.838805	0.40614	0.076339		Uba6	9.36265	7.77602e-21	1.1881e-19	0.587498
														Rgs16	0.838985	0.426852	0.0762461		Anxa11	9.35934	8.02386e-21	1.22508e-19	0.651425
														Rimkla	0.839086	1.0645	0.0761935		Wdr36	9.35792	8.13217e-21	1.24071e-19	0.78345
														H2-M2	0.839371	3.33197	0.0760463		Nhlrc2	9.35093	8.68794e-21	1.32455e-19	0.466383
														Tmc5	0.840468	0.601903	0.0754788		Rabggtb	9.34954	8.8033e-21	1.34117e-19	0.751325
														Dbn1	0.840895	0.658685	0.0752583		Peak1	9.34853	8.88772e-21	1.35305e-19	0.489576
														Them5	0.841322	1.94518	0.0750378		Nutf2-ps1	9.34579	9.12038e-21	1.38747e-19	0.773716
														Ptafr	0.841457	1.61771	0.0749679		Zfp516	9.3378	9.83539e-21	1.49516e-19	0.55901
														Gm34885	0.841518	1.36563	0.0749364		Zmiz1	9.33681	9.92756e-21	1.507e-19	0.430993
														Nfam1	0.842169	1.91623	0.0746007		Zc2hc1a	9.33562	1.00407e-20	1.52308e-19	0.426941
														Papolb	0.843484	1.17221	0.073923		Fermt1	9.33354	1.02393e-20	1.55209e-19	0.628305
														Gm15592	0.844118	1.29964	0.0735966		Kifap3	9.32958	1.06292e-20	1.61004e-19	0.621331
														Lrrc73	0.844305	0.682658	0.0735007		Glmp	9.32835	1.07533e-20	1.62767e-19	0.472395
														Id4	0.844793	1.58248	0.0732496		Echdc3	9.32265	1.13469e-20	1.71628e-19	0.920413
														Epha7	0.8454	0.204821	0.0729376		Mob4	9.32162	1.14573e-20	1.73174e-19	0.416707
														Yod1	0.845414	0.488127	0.0729306		Txndc9	9.32119	1.15037e-20	1.73751e-19	0.488046
														Sec16b	0.846707	0.786141	0.0722671		Dusp4	9.32067	1.15607e-20	1.74468e-19	0.930384
														Ltbp2	0.847243	0.891706	0.0719922		Mapk1ip1l	9.32061	1.15678e-20	1.74468e-19	0.492209
														Nlrp10	0.847507	0.0972363	0.0718565		Tmem234	9.32005	1.16284e-20	1.75258e-19	0.395274
														Trnp1	0.847541	1.20292	0.0718391		Lmnb1	9.31976	1.16608e-20	1.75619e-19	0.873259
														Gng2	0.848111	1.81938	0.0715471		Capza1	9.31481	1.22173e-20	1.8387e-19	0.449914
														Cdo1	0.848495	0.381253	0.0713507		Ubxn6	9.314	1.23104e-20	1.85139e-19	0.500252
														Abcc6	0.8486	2.90129	0.0712968		Rcan2	9.31366	1.23496e-20	1.85596e-19	1.66851
														Adgre1	0.848648	2.59644	0.0712725		Egr1	9.31239	1.24992e-20	1.8771e-19	0.746434
														Trim55	0.848668	2.40975	0.0712621		Gm6169	9.31104	1.26583e-20	1.89964e-19	0.78362
														Tmem229b	0.849035	0.605101	0.0710745		Gm12648	9.31077	1.26914e-20	1.90326e-19	3.24765
														Tmem221	0.849422	0.451154	0.0708766		Bicd1	9.30481	1.34229e-20	2.0101e-19	1.23151
														Gm7694	0.84949	0.719828	0.0708418		Mpst	9.30392	1.35366e-20	2.02569e-19	0.545421
														Tnfsf15	0.849721	0.497483	0.0707238		Polr2c	9.3007	1.39523e-20	2.08641e-19	0.507185
														Gm2479	0.850325	0.699144	0.070415		Wdfy3	9.29534	1.46741e-20	2.19124e-19	0.41834
														Gm39929	0.850743	1.54184	0.0702017		Zfp407	9.28611	1.60027e-20	2.38626e-19	0.414003
														Tcp10b	0.850892	1.23547	0.0701254		Larp7	9.28146	1.67167e-20	2.49097e-19	0.71766
														Gm42705	0.851351	0.730705	0.0698914		Mcu	9.27768	1.73215e-20	2.57927e-19	0.503566
														Ppp1r1a	0.851568	0.48817	0.0697805		Kifc3	9.2769	1.7448e-20	2.59627e-19	0.74185
														Il6	0.853464	0.823625	0.0688146		Marveld3	9.26963	1.868e-20	2.77763e-19	0.572997
														Cd83	0.853536	0.613597	0.0687783		Akr7a5	9.26913	1.87667e-20	2.78856e-19	0.515463
														Gm43568	0.853607	0.870457	0.068742		Papola	9.26833	1.89075e-20	2.80666e-19	0.409052
														Xaf1	0.853706	0.428222	0.0686919		Rtn3	9.26829	1.89152e-20	2.80666e-19	0.392782
														E130310I04Rik	0.855392	0.716884	0.0678349		Trip10	9.26726	1.90989e-20	2.83193e-19	0.84847
														Gm45494	0.856147	0.948164	0.0674518		Dync1li2	9.26672	1.91961e-20	2.84434e-19	0.472819
														Btk	0.857364	1.76419	0.0668346		Lsm2	9.26481	1.95429e-20	2.8937e-19	0.630883
														Cldn15	0.857412	1.46604	0.0668105		Arpc1b	9.26144	2.017e-20	2.98445e-19	0.406081
														Gm5441	0.858504	1.18319	0.0662577		Krt79	9.2613	2.01962e-20	2.98623e-19	2.52714
														4833419F23Rik	0.858627	0.845736	0.0661957		Ggact	9.26115	2.02249e-20	2.98838e-19	0.587701
														Gm32219	0.859613	0.511238	0.0656968		Lamtor4	9.25531	2.1361e-20	3.15403e-19	0.398609
														Tyrobp	0.859634	0.896775	0.0656865		Mapre1	9.25438	2.15481e-20	3.17943e-19	0.441936
														1700003D09Rik	0.860083	1.16453	0.0654596		Mbd5	9.24649	2.3198e-20	3.42049e-19	0.406717
														Fgfr4	0.860226	0.247012	0.0653874		Sfxn5	9.23239	2.64651e-20	3.89404e-19	1.01236
														Zg16	0.860566	2.2223	0.0652156		Lpgat1	9.23128	2.67428e-20	3.93215e-19	0.509142
														Degs2	0.862337	0.598705	0.064323		Wdr43	9.23106	2.67969e-20	3.93737e-19	0.465339
														Nckap1l	0.862626	1.35114	0.0641772		Zranb2	9.22995	2.70748e-20	3.97543e-19	0.398156
														C030014I23Rik	0.862988	0.478502	0.0639955		Trio	9.22528	2.82812e-20	4.14679e-19	0.41202
														4732496C06Rik	0.863604	0.980293	0.0636853		Gpat4	9.22459	2.84636e-20	4.17064e-19	0.542914
														9430085M18Rik	0.863699	1.01824	0.0636374		Nop14	9.22359	2.87306e-20	4.20684e-19	0.55557
														Lpar4	0.863802	0.782689	0.063586		Gnpat	9.22224	2.90953e-20	4.25728e-19	0.415312
														Il7r	0.863928	1.96948	0.0635226		Rab12	9.22084	2.94776e-20	4.31022e-19	0.474453
														Gzma	0.863934	1.47277	0.0635192		Ash2l	9.21581	3.08932e-20	4.51408e-19	0.515774
														Slc16a10	0.863969	1.52007	0.0635021		Ube2h	9.21511	3.1096e-20	4.54057e-19	0.392329
														Camkk1	0.863996	0.412316	0.0634884		Inava	9.21326	3.16381e-20	4.61653e-19	0.959147
														Dpf3	0.864009	1.6185	0.0634815		Znrd1	9.20974	3.26924e-20	4.76708e-19	0.556877
														Spats2l	0.864098	0.433696	0.063437		Cul2	9.20549	3.40126e-20	4.95616e-19	0.594071
														Ctnnd2	0.864153	0.212409	0.0634096		Sytl2	9.19839	3.6334e-20	5.29076e-19	0.397495
														Gm26691	0.864234	0.305214	0.0633685		Smarcad1	9.19322	3.81237e-20	5.54754e-19	0.420504
														Gm27241	0.864251	0.346124	0.0633599		Pla2g4a	9.19308	3.81745e-20	5.55109e-19	0.870459
														Grid2ip	0.864428	3.25307	0.0632709		Phf21a	9.19046	3.91163e-20	5.68414e-19	0.405597
														Adgrf3	0.864435	3.22368	0.0632675		Uqcc3	9.18737	4.02575e-20	5.84593e-19	0.439799
														E230013L22Rik	0.864977	0.581007	0.0629954		Glrx3	9.18676	4.04867e-20	5.87517e-19	0.442308
														Gm43597	0.865481	0.50895	0.0627423		Actb	9.18111	4.2667e-20	6.1873e-19	0.251511
														Fam229a	0.865642	0.878493	0.0626619		Commd3	9.17843	4.37412e-20	6.33872e-19	0.449088
														Azgp1	0.866705	1.41664	0.0621287		Wac	9.17451	4.53627e-20	6.56919e-19	0.392071
														Gm9961	0.866732	1.2298	0.062115		Sec62	9.17415	4.55162e-20	6.58689e-19	0.367539
														Gbp4	0.867107	2.83519	0.0619272		R3hdm1	9.17315	4.59373e-20	6.64326e-19	0.404148
														Tmem30b	0.86725	0.439301	0.0618555		Eif4e	9.16803	4.81764e-20	6.95753e-19	0.469219
														Snap91	0.867694	20.2748	0.0616336		Cdc123	9.16751	4.84073e-20	6.9861e-19	0.447159
														Sepsecs	0.867758	0.300069	0.0616012		Agl	9.16725	4.85242e-20	6.99817e-19	1.15831
														4930527F14Rik	0.86796	0.62034	0.0615005		Cops9	9.16715	4.8571e-20	7.00014e-19	0.382595
														F10	0.868018	0.826177	0.0614715		Dnajc5	9.16674	4.87548e-20	7.02183e-19	0.432632
														Zdhhc15	0.868519	1.12696	0.0612208		Nop16	9.16641	4.8902e-20	7.03821e-19	0.905919
														Cfap47	0.86871	0.409116	0.0611253		Nectin2	9.1657	4.92272e-20	7.08019e-19	0.395646
														Ric3	0.869156	0.951501	0.060902		Mtx2	9.16514	4.9481e-20	7.11184e-19	0.519491
														Cfap74	0.869252	1.31394	0.0608543		Mdh2	9.15936	5.22063e-20	7.49843e-19	0.407822
														Blnk	0.869361	1.16489	0.0607998		Akt1s1	9.15809	5.2824e-20	7.58199e-19	0.638348
														Gm15601	0.869361	0.498851	0.0607998		Nop53	9.15577	5.39706e-20	7.7413e-19	0.40502
														Rftn1	0.869842	2.02255	0.0605596		Ube2e3	9.15019	5.68329e-20	8.14631e-19	0.427273
														Ccdc136	0.870122	0.484154	0.06042		Mbtd1	9.13676	6.43544e-20	9.21815e-19	0.407288
														Stxbp5l	0.870286	0.285069	0.0603382		BC005624	9.13286	6.67106e-20	9.54917e-19	0.491999
														L1td1	0.870412	2.86671	0.0602753		Trip11	9.13177	6.73897e-20	9.63983e-19	0.410312
														Gm50100	0.870419	2.85183	0.0602719		Otub1	9.12872	6.93155e-20	9.90859e-19	0.579586
														Gm12860	0.870425	2.57955	0.0602685		Zfp622	9.12264	7.33142e-20	1.04731e-18	0.589744
														Cd300c2	0.870453	2.50743	0.0602548		Anxa5	9.12223	7.35933e-20	1.05058e-18	0.428195
														Nhs	0.870466	0.532008	0.060248		Marcksl1	9.11748	7.68927e-20	1.09694e-18	0.964999
														Kit	0.870466	2.30059	0.060248		Bin1	9.11646	7.76214e-20	1.10659e-18	0.791844
														1700126G02Rik	0.870511	0.412253	0.0602259		Alb	9.1153	7.84509e-20	1.11766e-18	1.7497
														Pcsk9	0.87223	0.903868	0.0593688		Atp2b1	9.1126	8.04345e-20	1.14515e-18	0.400548
														Lrrc6	0.87249	1.55357	0.0592397		Cbr3	9.11177	8.10473e-20	1.15309e-18	1.11456
														Ntn4	0.87266	0.498652	0.0591547		Srsf7	9.11104	8.15963e-20	1.16012e-18	0.40658
														Gm16337	0.872715	1.39098	0.0591276		Ing4	9.10998	8.23953e-20	1.17069e-18	0.471477
														Gm15674	0.872838	0.902756	0.0590664		Ptrh2	9.1049	8.63494e-20	1.22522e-18	0.750387
														Tff2	0.87306	1.37064	0.0589561		Xpo7	9.10467	8.65288e-20	1.22694e-18	0.416846
														Fcgr2b	0.873275	1.42236	0.0588491		Hmgn3	9.10413	8.69581e-20	1.2322e-18	1.38419
														Abi3	0.873282	1.25313	0.0588457		Fam192a	9.10294	8.79178e-20	1.24496e-18	0.517734
														Mettl7a3	0.873439	1.22393	0.0587676		Csnk2b	9.10156	8.90405e-20	1.26001e-18	0.424943
														Rtn2	0.873534	0.492886	0.0587201		Ncaph2	9.10094	8.955e-20	1.26637e-18	0.538145
														Sgsh	0.873626	0.485658	0.0586743		Tpm1	9.10027	9.01091e-20	1.27342e-18	0.339761
														Scap	0.873657	0.369246	0.058659		Ifitm2	9.09873	9.13906e-20	1.29067e-18	0.461199
														Cd86	0.873773	2.12011	0.0586013		Immp2l	9.09126	9.78938e-20	1.38159e-18	0.483651
														Foxo6	0.874241	0.657338	0.0583689		Tecpr2	9.09016	9.88937e-20	1.39477e-18	0.268368
														Batf	0.874825	0.485108	0.058079		Paqr8	9.08883	1.00107e-19	1.41093e-18	0.414799
														1700102P08Rik	0.875166	1.44153	0.0579095		Cox6a1	9.08491	1.03786e-19	1.46181e-18	0.368951
														Sycn	0.87645	2.85386	0.0572727		Hibadh	9.08377	1.04879e-19	1.47622e-18	0.379722
														BC016548	0.876505	1.38291	0.0572457		Fbxo36	9.08333	1.05302e-19	1.48118e-18	0.872686
														Gm3636	0.876587	1.36103	0.0572051		Camkmt	9.0785	1.10081e-19	1.54738e-18	0.609279
														Gm9117	0.876986	4.73674	0.0570071		Abl2	9.07795	1.10644e-19	1.55424e-18	0.440051
														Txn1	0.877383	-0.05191	0.0568109		Dhrs1	9.06801	1.21215e-19	1.70161e-18	0.668792
														Gdnf	0.878182	0.46448	0.0564154		Nelfb	9.06466	1.24987e-19	1.7534e-18	0.567868
														1600002D24Rik	0.87852	0.520909	0.0562481		Snrpd3	9.06074	1.29569e-19	1.81646e-18	0.439319
														Adipor2	0.878794	0.12454	0.056113		Rock2	9.05925	1.31357e-19	1.8403e-18	0.387348
														Gm47601	0.878821	0.40026	0.0560995		Shmt1	9.05833	1.32467e-19	1.85463e-18	0.751309
														Gm11963	0.878869	0.697536	0.0560758		Zzz3	9.05574	1.35651e-19	1.89794e-18	0.443235
														Gm28707	0.879306	1.20059	0.0558597		Herc3	9.05187	1.40546e-19	1.96512e-18	0.568164
														Nrap	0.879429	1.08966	0.055799		Ptk7	9.05102	1.41643e-19	1.97915e-18	0.618279
														Gpr35	0.879744	0.462467	0.0556437		Sap18b	9.04968	1.43385e-19	2.00217e-18	0.550543
														Gfi1	0.879778	2.11351	0.0556269		Phlpp1	9.04914	1.44092e-19	2.01071e-18	0.426913
														Rgs1	0.879812	2.07417	0.05561		Cox19	9.04562	1.48815e-19	2.07524e-18	0.690463
														Gm11906	0.880363	0.530362	0.0553384		Gatad2a	9.04168	1.54277e-19	2.14998e-18	0.401678
														Chil4	0.880896	2.34656	0.0550755		Pitpna	9.04105	1.55172e-19	2.16103e-18	0.375871
														Slc29a1	0.880974	0.503019	0.0550367		Srsf6	9.04079	1.55542e-19	2.16475e-18	0.43441
														Rnf208	0.881402	0.486527	0.0548261		Rnf128	9.04035	1.56178e-19	2.17217e-18	0.804524
														Prr18	0.881908	0.461828	0.0545768		Psmc5	9.03648	1.61798e-19	2.24885e-18	0.403911
														Slco4a1	0.881952	1.30088	0.0545549		Timm10	9.03488	1.6418e-19	2.28046e-18	0.654817
														Mfsd6l	0.881969	0.614436	0.0545465		Mlph	9.0264	1.77409e-19	2.46258e-18	0.416296
														Clec3b	0.882397	0.640301	0.0543361		Srek1ip1	9.02525	1.79286e-19	2.48701e-18	0.502511
														Zfp992	0.8824	1.95663	0.0543344		Ttc27	9.02461	1.80332e-19	2.49987e-18	0.783939
														Gm609	0.882407	2.23406	0.0543311		Cript	9.02339	1.82356e-19	2.52626e-18	0.405329
														Sox2	0.882578	1.36235	0.0542469		Aebp1	9.02302	1.82977e-19	2.53321e-18	1.35097
														Chl1	0.882612	0.407136	0.0542301		0610012G03Rik	9.02223	1.84307e-19	2.54994e-18	0.401125
														Ddx60	0.882793	0.51068	0.0541409		Rbm39	9.02088	1.86581e-19	2.57971e-18	0.287855
														Gm35240	0.883046	2.26742	0.0540164		Sptan1	9.01587	1.95316e-19	2.69871e-18	0.405526
														Sirpb1c	0.883108	1.99456	0.0539862		Acads	9.0147	1.97404e-19	2.72578e-18	0.646268
														AI662270	0.883115	1.69965	0.0539828		Adamts6	9.01417	1.98374e-19	2.73738e-18	0.992862
														4930570B17Rik	0.883156	0.39693	0.0539626		S100a10	9.01389	1.98876e-19	2.74252e-18	0.448419
														Sgpp1	0.883785	0.450886	0.0536533		Kcnk1	9.01309	2.00336e-19	2.76084e-18	0.407312
														Hectd3	0.884155	0.388468	0.0534718		Ndufc1	9.01237	2.01654e-19	2.77719e-18	0.372546
														Gm6277	0.884452	0.774511	0.0533256		Calu	9.00866	2.08591e-19	2.87085e-18	0.415969
														Gm12811	0.88449	1.09146	0.0533071		Seh1l	9.00858	2.0874e-19	2.87102e-18	0.634225
														Mest	0.884996	0.649772	0.0530586		Ppm1a	9.00554	2.14617e-19	2.94993e-18	0.436615
														Lypd2	0.885222	0.949937	0.0529478		Khdc4	9.00466	2.16327e-19	2.9715e-18	0.43208
														A830082N09Rik	0.885229	1.34593	0.0529445		Ap3s1	9.00136	2.22933e-19	3.06025e-18	0.529445
														1700094J05Rik	0.885297	0.429837	0.0529109		Gsdme	8.99916	2.27448e-19	3.1202e-18	0.774893
														1700026N04Rik	0.885427	0.955674	0.0528471		Ak3	8.99823	2.29377e-19	3.14461e-18	0.512752
														Tagln	0.885564	0.591432	0.05278		Cnn3	8.9973	2.31331e-19	3.16934e-18	1.53116
														Nat8f3	0.885742	2.09135	0.0526927		R3hdml	8.99674	2.32511e-19	3.18344e-18	2.79228
														Ccdc3	0.885749	1.20568	0.0526894		Pdss2	8.99652	2.32989e-19	3.18791e-18	0.487741
														1700030N03Rik	0.885756	0.651739	0.052686		Plgrkt	8.99577	2.34594e-19	3.20779e-18	0.60313
														Tm6sf1	0.885879	1.4599	0.0526256		Nip7	8.9881	2.51532e-19	3.43502e-18	0.695423
														1700012C14Rik	0.885879	1.72019	0.0526256		Lima1	8.98808	2.51581e-19	3.43502e-18	0.366353
														Gm32772	0.885906	1.38329	0.0526122		Epb41l1	8.98803	2.517e-19	3.43502e-18	0.484086
														Gm17396	0.886029	0.627816	0.0525518		Mapk14	8.98604	2.56295e-19	3.4932e-18	0.396512
														Tmem121b	0.886074	1.0723	0.05253		Mrfap1	8.98573	2.57023e-19	3.50012e-18	0.389819
														Gm12473	0.886139	0.577266	0.0524982		Nol7	8.98568	2.57134e-19	3.50012e-18	0.384316
														Rph3al	0.886159	0.2896	0.0524881		Psmd5	8.98272	2.64158e-19	3.5934e-18	0.552961
														Gm4858	0.886351	2.5894	0.0523942		Sos2	8.97551	2.82035e-19	3.83411e-18	0.423695
														Serpinb1b	0.886358	2.67162	0.0523909		Ldlrad3	8.96957	2.97667e-19	4.04402e-18	0.585507
														Taz	0.886738	0.362113	0.0522048		Pomp	8.96393	3.13317e-19	4.25282e-18	0.374609
														Car15	0.887292	0.514565	0.0519333		Fundc2	8.96199	3.18883e-19	4.32389e-18	0.496614
														Gm15890	0.888062	0.941084	0.0515565		Tagln2	8.95763	3.31728e-19	4.49517e-18	0.36227
														2310016G11Rik	0.888853	0.61328	0.05117		Malsu1	8.95171	3.50009e-19	4.73681e-18	0.429997
														Wfdc18	0.889589	20.2169	0.0508105		Mak16	8.94955	3.56933e-19	4.82741e-18	0.535151
														Rapsn	0.889712	0.906513	0.0507503		Ndufa7	8.94892	3.58984e-19	4.85203e-18	0.328106
														Plek	0.88976	1.12008	0.0507269		Wwtr1	8.94758	3.63349e-19	4.90789e-18	0.434523
														Gbp8	0.890565	0.678449	0.0503343		Utp11	8.94655	3.66758e-19	4.95077e-18	0.43407
														Hsf5	0.890801	0.678643	0.0502191		Hnrnpab	8.94383	3.75907e-19	5.06777e-18	0.394062
														Plekho2	0.891075	1.44357	0.0500855		Trp53bp1	8.94353	3.7694e-19	5.07845e-18	0.608756
														Smim5	0.891202	1.19506	0.0500238		Ptpn4	8.93848	3.94575e-19	5.31265e-18	0.504693
														Cited1	0.891206	1.18116	0.0500221		Dusp11	8.93393	4.11135e-19	5.53209e-18	0.378903
														4933401L05Rik	0.891212	1.03104	0.0500188		Tor1aip2	8.93367	4.12119e-19	5.54179e-18	0.420617
														Ldlrad1	0.891226	1.04315	0.0500121		Trib1	8.93149	4.20321e-19	5.64848e-18	0.580415
														Il16	0.891808	1.47608	0.0497285		Zfpm2	8.92891	4.30214e-19	5.77775e-18	2.17887
														Lgals2	0.891836	1.24784	0.0497151		Elf5	8.92709	4.37348e-19	5.86982e-18	0.669825
														Spib	0.891843	1.21893	0.0497118		2010204K13Rik	8.92544	4.43938e-19	5.95447e-18	1.26388
														Fez1	0.891904	1.16944	0.0496817		Npepps	8.92007	4.65976e-19	6.24609e-18	0.412327
														Gm17023	0.891925	1.24321	0.0496717		Trim27	8.91754	4.76781e-19	6.38686e-18	0.570405
														BC051142	0.892034	0.468288	0.0496184		Polr2k	8.91561	4.85132e-19	6.49461e-18	0.40757
														Slamf7	0.892398	1.97211	0.0494416		Ski	8.91369	4.93627e-19	6.59996e-18	0.400576
														Insyn2b	0.892452	1.4745	0.049415		Gnas	8.91267	4.98183e-19	6.65665e-18	0.284962
														Acacb	0.892672	0.250872	0.0493083		Pcbd2	8.90801	5.19559e-19	6.93788e-18	0.413638
														Gpx3	0.893199	0.65078	0.0490517		Mib1	8.90482	5.34714e-19	7.13573e-18	0.414175
														Ccr5	0.894022	1.02474	0.048652		Pacrg	8.90366	5.40362e-19	7.20653e-18	0.851264
														Arhgap30	0.894186	0.853477	0.0485721		Gcsh	8.90237	5.46665e-19	7.28599e-18	0.685908
														Gm14168	0.894532	1.18281	0.0484041		Msrb1	8.89563	5.80896e-19	7.73733e-18	0.435129
														Best1	0.894628	1.21793	0.0483575		Mrpl18	8.89552	5.81441e-19	7.73969e-18	0.387424
														Tmem132cos	0.894782	0.866379	0.0482826		Ankrd12	8.89478	5.85333e-19	7.78659e-18	0.39411
														Sh3bgr	0.895032	0.620952	0.0481612		Flot1	8.89296	5.95002e-19	7.91023e-18	0.5278
														8430432A02Rik	0.895104	1.90182	0.0481263		Stk19	8.88982	6.1209e-19	8.13228e-18	0.497295
														Atp8b4	0.895132	1.63425	0.048113		Wbp4	8.88536	6.37119e-19	8.45947e-18	0.377833
														Lcp2	0.895139	1.72994	0.0481097		Ptgr1	8.88396	6.45189e-19	8.56124e-18	0.628158
														Klhl6	0.89518	1.32983	0.0480897		Tmem60	8.8819	6.57293e-19	8.71636e-18	0.556745
														Ctss	0.895207	0.921816	0.0480764		Ythdc1	8.88015	6.67719e-19	8.84906e-18	0.382716
														Gm20429	0.895214	1.15254	0.0480731		Ccni	8.87884	6.75646e-19	8.94849e-18	0.41823
														H2-Oa	0.895255	0.837299	0.0480531		Mgat5	8.87863	6.76884e-19	8.95926e-18	0.401327
														8030455M16Rik	0.895324	1.08282	0.0480199		Tanc2	8.87341	7.09398e-19	9.38372e-18	0.367123
														Kcnj14	0.895649	3.07622	0.047862		Ppp2r1a	8.87138	7.22437e-19	9.5472e-18	0.420358
														Xlr4a	0.895656	2.63958	0.0478587		Cstf3	8.87135	7.22662e-19	9.5472e-18	0.396344
														Lrrc56	0.895941	0.609439	0.0477207		Vkorc1l1	8.86944	7.35141e-19	9.70598e-18	0.462677
														Tafa5	0.896338	0.850449	0.047528		Rrp15	8.86824	7.43106e-19	9.80501e-18	1.0392
														5830444B04Rik	0.896359	0.481787	0.0475181		Kdm1a	8.8674	7.48706e-19	9.87272e-18	0.3943
														Alox5ap	0.896777	0.711989	0.0473155		Ypel3	8.86643	7.55317e-19	9.95366e-18	0.398857
														Reg4	0.897216	0.46554	0.047103		Chd1	8.85957	8.03201e-19	1.05781e-17	0.432279
														Ear2	0.897271	1.02031	0.0470765		Mrps9	8.8588	8.08808e-19	1.06453e-17	0.438545
														Kif1a	0.897326	0.817934	0.0470499		Mlf2	8.84921	8.81438e-19	1.1594e-17	0.406815
														Nphp4	0.897579	0.64654	0.0469271		Tbc1d15	8.84648	9.03222e-19	1.18731e-17	0.382896
														Csf3r	0.897737	1.88622	0.0468508		Stxbp2	8.84506	9.14828e-19	1.20153e-17	0.458884
														Arhgap25	0.897854	1.46786	0.0467945		Mrpl1	8.84501	9.15183e-19	1.20153e-17	0.49114
														Nlgn3	0.89795	1.14906	0.046748		Mrpl33	8.84478	9.17067e-19	1.20326e-17	0.378639
														Fli1	0.898049	1.28708	0.0466999		Arhgap42	8.84226	9.38009e-19	1.22921e-17	0.928281
														Wdfy4	0.89845	1.65851	0.046506		Mapk13	8.83927	9.63487e-19	1.26181e-17	0.547262
														Gm17024	0.898457	1.52798	0.0465026		Kdm5a	8.83735	9.80179e-19	1.28287e-17	0.374206
														Slc5a9	0.898937	4.17939	0.0462706		Xrcc4	8.8366	9.86737e-19	1.29065e-17	0.439377
														Gm41138	0.898937	3.91874	0.0462706		Srrm2	8.83574	9.94339e-19	1.29979e-17	0.285287
														Klrb1c	0.898944	3.33164	0.0462673		Ddx39b	8.83321	1.01714e-18	1.32877e-17	0.384715
														Krt87	0.898948	0.619157	0.0462657		Nsun2	8.83027	1.04426e-18	1.36335e-17	0.613369
														Gm43189	0.898951	3.04483	0.046264		Rad50	8.82212	1.12315e-18	1.46545e-17	0.480215
														Gm29542	0.898951	3.37625	0.046264		Zfand5	8.8171	1.17462e-18	1.53166e-17	0.392073
														Fyn	0.9	0.392402	0.0457573		Ruvbl1	8.816	1.18622e-18	1.54582e-17	0.649579
														Adarb2	0.900179	0.490613	0.0456712		Sde2	8.81473	1.19969e-18	1.56241e-17	0.483221
														Gm5431	0.900216	0.681866	0.045653		Nucb1	8.8115	1.23485e-18	1.60721e-17	0.423007
														Evi2	0.900244	0.699264	0.0456398		Lipa	8.81073	1.24337e-18	1.61731e-17	1.29851
														BC067074	0.90057	0.891033	0.0454826		Atp6v1d	8.80263	1.33643e-18	1.73728e-17	0.421436
														Amt	0.901132	0.35053	0.0452114		Slc20a2	8.79949	1.37437e-18	1.7855e-17	0.569026
														Cpne5	0.901191	1.15931	0.0451833		Gss	8.79796	1.39329e-18	1.80895e-17	0.672563
														Cacna2d2	0.901348	0.91348	0.0451073		Rab10	8.79557	1.42318e-18	1.84663e-17	0.377952
														Pglyrp2	0.901716	2.07356	0.0449304		Commd6	8.79489	1.43183e-18	1.85671e-17	0.421492
														Ccl4	0.901791	1.55667	0.0448941		Anapc5	8.79128	1.47864e-18	1.91624e-17	0.415392
														Gm43824	0.901805	1.37092	0.0448875		Naa20	8.78802	1.52215e-18	1.97141e-17	0.692528
														Map3k14	0.901949	0.36056	0.0448181		Ubxn4	8.78714	1.53417e-18	1.98576e-17	0.363581
														Kcnf1	0.902745	0.503281	0.0444349		Pnn	8.78531	1.5594e-18	2.01717e-17	0.412385
														4930509G22Rik	0.902889	0.657172	0.0443656		Tmem11	8.78523	1.56048e-18	2.01733e-17	0.451181
														Mvk	0.903006	0.396693	0.0443095		Ndufv2	8.78349	1.58478e-18	2.0475e-17	0.389498
														Stac3	0.903973	0.921166	0.0438443		Pfdn4	8.77834	1.65901e-18	2.14077e-17	0.676384
														Gm42829	0.904406	1.47063	0.0436366		Samm50	8.7779	1.66554e-18	2.14788e-17	0.472405
														Aif1	0.90444	1.7737	0.0436201		Gm26917	8.77663	1.6845e-18	2.17101e-17	0.473696
														Gm26511	0.904468	1.6417	0.0436069		Gabarapl2	8.77599	1.69413e-18	2.18209e-17	0.377712
														Gm15918	0.904516	1.40257	0.0435839		Ahnak2	8.77491	1.71045e-18	2.20176e-17	1.21392
														Gm12781	0.904536	1.17567	0.043574		Ryr3	8.77406	1.72341e-18	2.21709e-17	1.19565
														Gm4665	0.904536	1.14424	0.043574		Dhx9	8.77044	1.7797e-18	2.2881e-17	0.396354
														Gm13571	0.904605	0.911855	0.043541		Srsf10	8.76868	1.80779e-18	2.3228e-17	0.388391
														Ighm	0.904632	0.794676	0.0435278		Gm49797	8.7682	1.81539e-18	2.33114e-17	0.576808
														Myocos	0.904962	2.48703	0.0433697		Cab39	8.76502	1.86737e-18	2.39644e-17	0.390671
														Tmem273	0.90501	2.46513	0.0433466		Chd9	8.76085	1.93781e-18	2.48533e-17	0.39606
														Ms4a7	0.905017	2.22624	0.0433433		Mrpl17	8.75833	1.98173e-18	2.5401e-17	0.392279
														2010110G14Rik	0.905037	1.99144	0.0433334		Hpcal1	8.75578	2.02693e-18	2.59647e-17	0.355311
														Ube2u	0.905044	1.78309	0.0433301		Ssr4	8.74943	2.14433e-18	2.74352e-17	0.369551
														Sycp1	0.905051	1.77559	0.0433268		Celf1	8.74904	2.15184e-18	2.75145e-17	0.372786
														Gm10516	0.905137	0.40955	0.0432857		Hnrnpm	8.74879	2.15647e-18	2.7557e-17	0.380078
														Gm11240	0.906716	0.805307	0.0425286		U2af1	8.74735	2.18413e-18	2.78936e-17	0.387252
														Gm20705	0.906733	0.776073	0.0425204		Fam129b	8.74667	2.19733e-18	2.80444e-17	0.38554
														Gm1141	0.907187	1.25996	0.0423034		Ndufa9	8.74661	2.19859e-18	2.80444e-17	0.425418
														Gm11629	0.907221	1.26221	0.0422869		Dock4	8.7456	2.21826e-18	2.8261e-17	0.391897
														Gm16143	0.907774	1.58989	0.0420223		Itgb1	8.7456	2.21826e-18	2.8261e-17	0.364383
														Slc30a2	0.907781	1.51534	0.0420191		Usp40	8.74508	2.2285e-18	2.83743e-17	0.57146
														Cd5	0.907959	0.777227	0.0419336		Arhgap12	8.73994	2.33241e-18	2.96795e-17	0.419389
														Npm2	0.908011	1.23909	0.041909		Hmga1	8.7385	2.36221e-18	3.00405e-17	1.44966
														Gm12506	0.908272	4.1712	0.0417842		Rac1	8.7301	2.54455e-18	3.23398e-17	0.384663
														Gm4070	0.908286	3.7085	0.0417776		Usp10	8.729	2.56933e-18	3.26351e-17	0.376371
														Il21r	0.908286	3.41157	0.0417776		Sntb2	8.71881	2.81141e-18	3.56885e-17	0.436862
														1700029J03Rik	0.908286	3.13355	0.0417776		Raly	8.71711	2.85389e-18	3.6206e-17	0.403582
														1700015F17Rik	0.908306	2.7282	0.0417678		Pcbp2	8.71695	2.85794e-18	3.62355e-17	0.368516
														Lrrc25	0.908306	2.77107	0.0417678		Mipol1	8.71528	2.90045e-18	3.67523e-17	0.495501
														Pdx1	0.908313	2.19176	0.0417645		Galnt7	8.71383	2.93773e-18	3.72025e-17	0.201495
														Gm33180	0.90832	2.48355	0.0417612		Plin3	8.71092	3.01408e-18	3.81463e-17	0.441675
														Nlrx1	0.909364	0.361273	0.0412623		Gcnt2	8.70961	3.0493e-18	3.8569e-17	0.763869
														Frmd6	0.910047	0.197983	0.0409359		Yme1l1	8.70865	3.07517e-18	3.88729e-17	0.372008
														Tmod4	0.910161	0.653593	0.0408819		Mvb12a	8.7076	3.10374e-18	3.92105e-17	0.384633
														Kng1	0.910573	1.41298	0.0406852		Tmem167	8.70595	3.14926e-18	3.97617e-17	0.397502
														P2rx6	0.91069	1.04234	0.0406295		Crb3	8.70172	3.26888e-18	4.12474e-17	0.392406
														Abra	0.911006	2.07881	0.0404788		Ccdc85b	8.69757	3.39066e-18	4.27584e-17	0.450207
														Nfasc	0.91104	2.01655	0.0404624		Stk25	8.69622	3.43115e-18	4.32431e-17	0.706055
														9330102E08Rik	0.911054	1.86632	0.0404559		Fam168a	8.69259	3.54263e-18	4.46215e-17	0.407964
														Nyx	0.911061	1.70291	0.0404526		Phc2	8.69047	3.60933e-18	4.54345e-17	0.466945
														Ms4a6d	0.911075	1.84781	0.040446		Srp72	8.68923	3.6492e-18	4.59089e-17	0.382187
														Rgs9bp	0.911095	1.47116	0.0404362		Rpgrip1	8.68886	3.66104e-18	4.60305e-17	0.564295
														1700097N02Rik	0.911191	0.74058	0.0403904		Ngef	8.68757	3.7026e-18	4.65252e-17	0.751586
														Gm43331	0.91126	0.697338	0.0403576		Lamtor3	8.68575	3.76265e-18	4.72516e-17	0.64589
														Vwa5b2	0.911569	19.8657	0.0402103		Atxn2	8.68439	3.80766e-18	4.77885e-17	0.370317
														Vmn2r10	0.911569	20.6023	0.0402103		Ing1	8.68417	3.81507e-18	4.7853e-17	0.45288
														Lilra6	0.911569	21.4538	0.0402103		Taf2	8.68107	3.92075e-18	4.91492e-17	0.59722
														Gm29367	0.911569	19.939	0.0402103		Fars2	8.67304	4.20726e-18	5.27095e-17	0.366658
														5033417F24Rik	0.91236	0.920216	0.0398339		Tatdn1	8.67237	4.23232e-18	5.2992e-17	0.81645
														Mmp12	0.912394	1.41445	0.0398176		Eid1	8.67125	4.27392e-18	5.34811e-17	0.511846
														Ttpa	0.912978	0.868388	0.0395396		Snx27	8.66501	4.51477e-18	5.64614e-17	0.459296
														Gm47731	0.913057	1.20748	0.039502		Gstp1	8.66176	4.64538e-18	5.80604e-17	0.452375
														Nav1	0.913219	0.296034	0.0394252		Cnot7	8.66023	4.70814e-18	5.88099e-17	0.482399
														AA388235	0.913339	1.4373	0.039368		Memo1	8.65938	4.74352e-18	5.9193e-17	0.439702
														Gm35248	0.913353	1.04292	0.0393614		Supt20	8.65935	4.74442e-18	5.9193e-17	0.401435
														Cabp2	0.913769	1.2918	0.0391637		Bbx	8.65372	4.98465e-18	6.21534e-17	0.405776
														Gm42031	0.914071	0.635808	0.03902		Phf3	8.64622	5.32326e-18	6.63362e-17	0.369359
														Acat3	0.91414	0.602426	0.0389873		Pdhb	8.64521	5.37053e-18	6.68858e-17	0.452868
														A230072E10Rik	0.91426	0.45876	0.0389302		Lamb3	8.64437	5.41022e-18	6.73403e-17	0.402353
														Runx3	0.914391	1.46223	0.0388682		Tomm5	8.64393	5.4314e-18	6.75641e-17	0.454079
														Slfn1	0.914398	1.69441	0.0388649		Cd38	8.64277	5.4867e-18	6.82117e-17	1.5204
														4930417O13Rik	0.914418	1.79831	0.0388551		Dctn4	8.63908	5.66668e-18	7.04078e-17	0.370095
														Tmem63c	0.914425	1.82961	0.0388518		Mrps28	8.63189	6.0347e-18	7.49362e-17	0.389619
														Cybb	0.916154	0.757248	0.0380314		1700123O20Rik	8.6296	6.15663e-18	7.64053e-17	0.614057
														2025-03-04	0.916168	0.650564	0.0380249		Samd5	8.62312	6.5157e-18	8.08139e-17	1.45091
														Mcemp1	0.916491	1.32781	0.0378717		Wdfy1	8.62155	6.60534e-18	8.18775e-17	0.488563
														Aqp2	0.916498	1.0464	0.0378684		Map1b	8.61769	6.83157e-18	8.4632e-17	0.789066
														C2cd2l	0.916574	0.530127	0.0378326		Epc1	8.61367	7.0756e-18	8.76036e-17	0.405762
														Nat14	0.917059	0.745404	0.037603		Zyx	8.61336	7.09488e-18	8.77909e-17	0.755331
														Cntnap1	0.917131	1.44985	0.0375688		Agrp	8.61077	7.25738e-18	8.97489e-17	1.03764
														Pknox2	0.917138	1.42568	0.0375655		Tmem33	8.60972	7.32407e-18	9.05205e-17	0.411393
														Prkcq	0.917186	1.33006	0.0375427		Pdia3	8.60802	7.4331e-18	9.18142e-17	0.344579
														Gm13889	0.917261	1.24325	0.0375069		Khsrp	8.60173	7.85247e-18	9.69376e-17	0.457806
														Gm43192	0.917633	2.5175	0.0373311		Traf4	8.60038	7.94553e-18	9.80289e-17	0.761015
														Tcap	0.917647	2.77942	0.0373246		Ptpn13	8.59842	8.08227e-18	9.96577e-17	0.396858
														Wasf3	0.917653	2.83741	0.0373213		Tm9sf4	8.5979	8.11865e-18	1.00048e-16	0.3723
														Hpca	0.917667	2.6498	0.0373148		Tshz2	8.59698	8.18449e-18	1.008e-16	0.604107
														BC024139	0.917667	2.40152	0.0373148		Afp	8.5944	8.37001e-18	1.03025e-16	0.773343
														Gm31371	0.917674	2.76865	0.0373116		Clmn	8.59267	8.49728e-18	1.0453e-16	0.428706
														Cd300ld	0.917674	2.5423	0.0373116		Denr	8.59255	8.50594e-18	1.04576e-16	0.389665
														Slco2b1	0.917688	2.044	0.0373051		Pip4p2	8.59226	8.52746e-18	1.04779e-16	0.503379
														Gpr153	0.918042	0.42809	0.0371375		Mtpn	8.58567	9.03082e-18	1.10835e-16	0.394492
														Skap1	0.918991	0.578822	0.0366887		Spp1	8.57973	9.50959e-18	1.16575e-16	1.71773
														Rgs8	0.919029	0.238541	0.0366708		Mbd2	8.57794	9.65903e-18	1.18339e-16	0.373128
														Nipa1	0.91938	0.433791	0.036505		Mrpl45	8.57569	9.84965e-18	1.20604e-16	0.687261
														Swt1	0.919617	-0.0162813	0.036393		Pkn2	8.56264	1.10311e-17	1.34991e-16	0.353712
														Csmd2	0.919954	0.955767	0.0362338		Chd6	8.5606	1.12285e-17	1.37328e-16	0.366746
														Gm29811	0.920064	0.81635	0.0361818		Fbxl3	8.55698	1.15864e-17	1.41623e-16	0.470699
														Gm42538	0.920391	1.84147	0.0360276		Thumpd3	8.55594	1.16914e-17	1.42823e-16	0.730374
														Scin	0.920412	1.96119	0.0360179		Gmeb2	8.55166	1.21333e-17	1.4805e-16	0.693284
														Gm47113	0.92046	1.23264	0.0359952		Npdc1	8.55144	1.21566e-17	1.48248e-16	0.444616
														Col5a2	0.920467	1.59032	0.0359919		Ptprj	8.55119	1.21822e-17	1.48474e-16	0.39046
														Gm6410	0.920549	1.00138	0.035953		Snrpb2	8.55085	1.22183e-17	1.48829e-16	0.594895
														Ebf1	0.92057	0.76231	0.0359432		Dhps	8.54991	1.23183e-17	1.4996e-16	0.612684
														A730020E08Rik	0.920921	0.52446	0.0357777		Isca1	8.54479	1.28775e-17	1.56677e-16	0.628239
														Ces2g	0.920938	3.91781	0.0357696		Use1	8.54305	1.30722e-17	1.58954e-16	0.36173
														Gm17324	0.920945	3.97728	0.0357664		Gm16286	8.54137	1.32638e-17	1.61191e-16	0.428297
														Pcare	0.920952	3.74023	0.0357631		Grasp	8.54087	1.33211e-17	1.61795e-16	0.844371
														Gm2675	0.920966	2.8479	0.0357566		Gigyf2	8.54055	1.33581e-17	1.62151e-16	0.364913
														Gm47732	0.920966	2.41414	0.0357566		Stn1	8.53882	1.35595e-17	1.645e-16	0.830288
														Gm47591	0.920966	1.89687	0.0357566		Adora1	8.53854	1.35926e-17	1.64807e-16	0.959627
														Gm44997	0.921451	0.788458	0.0355279		Cop1	8.53806	1.36498e-17	1.65405e-16	0.375461
														Gm15663	0.921846	0.673929	0.0353415		Iars2	8.53641	1.38451e-17	1.67676e-16	0.446775
														Cxxc5	0.922104	0.267254	0.03522		Galk2	8.53551	1.39545e-17	1.68903e-16	0.493916
														Cyp2c65	0.922634	0.909342	0.0349705		Rbm33	8.53369	1.41748e-17	1.71472e-16	0.372508
														Gm16235	0.922792	0.758662	0.034896		Crebrf	8.53121	1.44823e-17	1.75092e-16	0.365454
														Gm20743	0.923254	1.08682	0.034679		Ttll7	8.53106	1.45013e-17	1.75221e-16	0.378179
														Bend5	0.923419	0.602905	0.0346013		Zfp451	8.52488	1.52973e-17	1.84733e-16	0.550988
														Gm12404	0.923715	2.11973	0.0344622		Ndufv3	8.52372	1.54504e-17	1.86474e-16	0.356231
														Extl1	0.923722	2.16706	0.0344589		Pa2g4	8.52352	1.54781e-17	1.86703e-16	0.418974
														Lrrn4cl	0.923728	2.02746	0.0344557		Ccnd1	8.52198	1.56846e-17	1.89085e-16	0.379548
														Slfn4	0.923742	1.85696	0.0344492		Tuba1b	8.51487	1.66781e-17	2.00947e-16	0.387453
														Gm15232	0.923749	2.24999	0.034446		Chmp4c	8.51415	1.67819e-17	2.01982e-16	0.567228
														Cd48	0.923756	1.71989	0.0344427		Gsta4	8.51414	1.67832e-17	2.01982e-16	0.402946
														Mmp9	0.923797	1.35026	0.0344233		Pcolce	8.51217	1.70704e-17	2.05322e-16	1.30561
														Hm629797	0.923804	1.37071	0.0344201		Rbm22	8.51145	1.71767e-17	2.06482e-16	0.548974
														Spsb4	0.923818	1.26302	0.0344136		Ptpmt1	8.50938	1.74862e-17	2.10084e-16	0.501572
														Pnpla5	0.923839	0.878007	0.0344039		Aff4	8.50786	1.77177e-17	2.12744e-16	0.372571
														C530044C16Rik	0.923845	0.938109	0.0344007		Prpf6	8.5076	1.77568e-17	2.13092e-16	0.412017
														Gm30928	0.923921	0.214735	0.0343651		Card19	8.50741	1.77867e-17	2.13329e-16	0.931901
														Trp53i11	0.92443	0.502068	0.0341257		Mcee	8.50713	1.78293e-17	2.13718e-16	0.456422
														Pla2g3	0.925535	0.72256	0.033607		Cyc1	8.50209	1.862e-17	2.2307e-16	0.360813
														AY512931	0.925849	0.476739	0.0334601		Sap30l	8.50012	1.89397e-17	2.26771e-16	0.519223
														Mocos	0.925862	0.520683	0.0334536		Ddx47	8.49671	1.95042e-17	2.33397e-16	0.427248
														Lrtm2	0.92611	0.781897	0.0333374		Snrpc	8.4952	1.97598e-17	2.36322e-16	0.606143
														Zfp804b	0.926478	1.83629	0.0331647		Gmfb	8.48976	2.07059e-17	2.47496e-16	0.509845
														Rsph14	0.926499	1.40137	0.033155		Adipor1	8.48785	2.10498e-17	2.51323e-16	0.368812
														Paqr3	0.926854	0.488227	0.0329888		Mzt1	8.48403	2.17532e-17	2.59574e-16	0.719272
														Cfap97d1	0.927012	2.44534	0.0329146		Gmds	8.47884	2.27441e-17	2.71245e-16	0.445669
														Irf4	0.927019	2.2603	0.0329114		Zc3h18	8.4786	2.27916e-17	2.71657e-16	0.45404
														1700063D05Rik	0.927033	2.44999	0.0329049		Atf2	8.47751	2.30065e-17	2.74063e-16	0.391605
														Cd22	0.927046	2.75093	0.0328985		Ube2d2a	8.47646	2.32147e-17	2.76387e-16	0.361498
														Parvg	0.927053	1.90801	0.0328953		Zdhhc5	8.47208	2.41048e-17	2.86822e-16	0.561581
														Cd3g	0.92706	1.68176	0.032892		Plce1	8.46949	2.4647e-17	2.93109e-16	1.49715
														Cd244a	0.92706	1.95925	0.032892		Mpc2	8.46477	2.56656e-17	3.0505e-16	0.374165
														Hk3	0.927067	1.70603	0.0328888		Mfsd10	8.46444	2.57391e-17	3.05752e-16	0.949944
														P2rx1	0.927074	1.51066	0.0328856		Btbd7	8.45962	2.68241e-17	3.18461e-16	0.372443
														Ccr7	0.927095	0.992268	0.0328759		Faf2	8.45849	2.70855e-17	3.21383e-16	0.381537
														Fndc4	0.927745	0.531696	0.0325712		Arpc5	8.4572	2.73869e-17	3.24777e-16	0.378547
														H2-Q2	0.928348	0.499819	0.0322892		Iars	8.45694	2.74491e-17	3.25331e-16	0.606119
														Dio1	0.928382	1.02254	0.0322731		Chd8	8.4558	2.77185e-17	3.28339e-16	0.363782
														Gm27011	0.928396	1.01644	0.0322667		Ndfip1	8.4542	2.81019e-17	3.32695e-16	0.360894
														Gm48435	0.928554	0.551988	0.0321926		Atg12	8.45384	2.81866e-17	3.3351e-16	0.478656
														Patl2	0.928768	0.719898	0.0320928		Tiprl	8.45373	2.82128e-17	3.33632e-16	0.472415
														Lce3a	0.928851	0.684496	0.0320541		Ly6d	8.45366	2.82306e-17	3.33656e-16	1.39197
														A430010J10Rik	0.929161	0.279906	0.0319093		Cpox	8.44851	2.95054e-17	3.48528e-16	0.601205
														Adam1b	0.929188	1.1615	0.0318964		Smim10l1	8.44843	2.95251e-17	3.48565e-16	0.363662
														Irs3	0.929319	0.821217	0.0318352		Agrn	8.44802	2.96283e-17	3.49587e-16	0.66632
														Ifi209	0.929815	1.76438	0.0316035		Dhx36	8.44651	3.00155e-17	3.53958e-16	0.368094
														Cyp4f18	0.929829	1.43977	0.0315971		Retreg1	8.44446	3.05445e-17	3.59995e-16	0.367639
														Il10	0.929891	1.13431	0.0315682		Dynlt1f	8.44237	3.10965e-17	3.66296e-16	0.765538
														Duxbl1	0.929959	0.420935	0.031536		Dstn	8.44203	3.11866e-17	3.67152e-16	0.319401
														Rasal3	0.929973	0.654687	0.0315296		Dnlz	8.44002	3.17277e-17	3.73314e-16	0.47143
														Gm27184	0.92998	0.579228	0.0315263		Tsg101	8.43977	3.17972e-17	3.73923e-16	0.416325
														Gm28515	0.930318	3.24266	0.0313688		Brd2	8.43824	3.22147e-17	3.78622e-16	0.366026
														Gm36670	0.930318	3.2741	0.0313688		Gys1	8.43782	3.2332e-17	3.79788e-16	0.461496
														Gm28096	0.930324	2.77516	0.0313655		Fxyd3	8.43575	3.29085e-17	3.86345e-16	0.826519
														Gabrd	0.930331	2.58146	0.0313623		Snx3	8.43128	3.41909e-17	4.01177e-16	0.36304
														Hydin	0.930331	2.89043	0.0313623		Bet1	8.43014	3.45255e-17	4.04877e-16	0.462948
														Gm29825	0.930331	2.29944	0.0313623		Zfp53	8.42517	3.60229e-17	4.22203e-16	0.659157
														Sirpb1a	0.930338	2.4285	0.0313591		Hipk3	8.42347	3.65506e-17	4.28149e-16	0.456564
														Gm36172	0.930345	2.32031	0.0313559		Fbxw8	8.42103	3.73184e-17	4.36901e-16	0.393682
														Aqp7	0.930345	2.24532	0.0313559		Dad1	8.42055	3.74733e-17	4.38293e-16	0.297514
														Gm17233	0.930345	2.75159	0.0313559		Slf2	8.42046	3.74997e-17	4.38293e-16	0.478224
														Was	0.930366	1.64737	0.0313463		Arf5	8.42046	3.74997e-17	4.38293e-16	0.360931
														2810030D12Rik	0.930686	0.736729	0.0311968		Lxn	8.41661	3.87529e-17	4.52438e-16	0.767341
														Med9os	0.931433	0.728749	0.0308481		Jup	8.41552	3.91141e-17	4.56403e-16	0.379844
														Mir142hg	0.931461	0.80372	0.0308353		Wasl	8.41541	3.91532e-17	4.56606e-16	0.370307
														Abcc8	0.931478	-0.0814527	0.0308273		Washc2	8.40911	4.13127e-17	4.81525e-16	0.471499
														Gm45820	0.931688	0.492281	0.0307293		Ehmt2	8.40803	4.16975e-17	4.85741e-16	0.447971
														Phyhipl	0.931929	0.43333	0.0306169		Tia1	8.40506	4.27656e-17	4.97909e-16	0.380132
														Hvcn1	0.932112	0.979411	0.0305319		Rbpj	8.4048	4.28605e-17	4.98738e-16	0.420148
														Gm12689	0.932202	0.52762	0.0304901		Ccar1	8.40427	4.30539e-17	5.00713e-16	0.36408
														Hormad2	0.932436	0.467996	0.030381		Gata6	8.4037	4.32626e-17	5.02863e-16	0.356081
														Gm20476	0.932646	0.785588	0.0302832		Lrrc4	8.40141	4.41156e-17	5.12495e-16	0.427619
														Tex26	0.933104	1.87996	0.0300699		Dnpep	8.3997	4.47617e-17	5.19714e-16	0.488923
														Gm17216	0.933108	0.468285	0.0300683		4933434E20Rik	8.3996	4.48014e-17	5.19888e-16	0.467978
														Cass4	0.933132	1.012	0.0300571		Dpm2	8.39806	4.53903e-17	5.26433e-16	0.482352
														Gm46224	0.933139	1.51112	0.0300538		Cubn	8.39685	4.58632e-17	5.31333e-16	1.8112
														Pln	0.933145	1.28267	0.0300506		Med30	8.39328	4.72748e-17	5.47385e-16	0.712824
														A630023P12Rik	0.933152	1.53578	0.0300474		Erbb3	8.39087	4.82555e-17	5.58434e-16	0.44435
														Hrh2	0.933173	0.925874	0.0300378		Map3k4	8.39057	4.83802e-17	5.5957e-16	0.488744
														Gm50034	0.933201	0.777147	0.030025		Rc3h1	8.39004	4.85964e-17	5.61763e-16	0.360149
														Fcgr1	0.933617	20.1706	0.029831		Tox4	8.38864	4.9182e-17	5.67909e-16	0.445948
														Gm39321	0.933617	20.9776	0.029831		Myh9	8.38837	4.92944e-17	5.68896e-16	0.360524
														H2al1f	0.933617	19.5169	0.029831		H2afv	8.38788	4.94983e-17	5.70936e-16	0.370431
														Gm15701	0.933617	19.1389	0.029831		Hdhd2	8.38756	4.96353e-17	5.71891e-16	0.666274
														Slc35f2	0.933617	18.6062	0.029831		Sdccag8	8.38535	5.05748e-17	5.82397e-16	0.506478
														Apol7e	0.933617	19.9732	0.029831		Fmn1	8.38146	5.22753e-17	6.01651e-16	0.784963
														Slc44a5	0.933617	19.8207	0.029831		Pitpnc1	8.38099	5.24836e-17	6.03719e-16	0.805288
														Gm29676	0.933617	20.1224	0.029831		Pde4dip	8.38087	5.25377e-17	6.04012e-16	0.499753
														D030018L15Rik	0.933617	20.1814	0.029831		Lsm7	8.37698	5.43013e-17	6.23947e-16	0.444654
														9230102O04Rik	0.933617	19.3713	0.029831		Nr2f6	8.3765	5.45255e-17	6.25865e-16	0.456012
														4930578G10Rik	0.933617	20.3446	0.029831		Tspan1	8.37649	5.45275e-17	6.25865e-16	0.466718
														Scn5a	0.933617	18.9974	0.029831		Skil	8.36971	5.77607e-17	6.61893e-16	0.488847
														C1ql2	0.933617	19.7482	0.029831		Coa3	8.36767	5.87695e-17	6.73089e-16	0.368417
														Pnpla3	0.933617	20.1737	0.029831		Rfc3	8.367	5.91053e-17	6.76567e-16	0.818805
														Ctrb1	0.933617	20.1348	0.029831		Slc44a3	8.36633	5.94409e-17	6.80038e-16	0.365138
														Mymx	0.933617	20.0253	0.029831		Kcnq5	8.36613	5.95392e-17	6.80794e-16	0.776551
														Noxa1	0.933714	0.809355	0.0297862		Tmem126a	8.35799	6.37942e-17	7.28657e-16	0.449148
														Gm7580	0.93421	0.650417	0.0295555		Runx2	8.35435	6.57945e-17	7.51097e-16	1.33894
														Tmprss5	0.934389	1.05712	0.0294722		Gm42722	8.35246	6.68581e-17	7.62827e-16	0.775753
														D830035M03Rik	0.93461	0.932186	0.0293697		Nrg1	8.35066	6.78815e-17	7.74084e-16	1.84344
														Cyth4	0.934727	0.85248	0.0293153		Wdr33	8.34633	7.042e-17	8.02598e-16	0.351412
														F630042J09Rik	0.935154	0.380723	0.0291168		Rprd1a	8.34238	7.28115e-17	8.29407e-16	0.569491
														Ap1s2	0.935351	0.325185	0.0290256		Rab38	8.34166	7.32559e-17	8.34017e-16	0.576322
														Bcas1os2	0.935395	0.722201	0.0290048		Tsta3	8.33793	7.5601e-17	8.60252e-16	0.498847
														Cryba4	0.93543	0.745629	0.0289888		Hnrnpa1	8.33283	7.89309e-17	8.97658e-16	0.373114
														Ms4a8a	0.935871	1.24808	0.0287841		Sfn	8.33089	8.0236e-17	9.12009e-16	0.669329
														Rhoh	0.935892	1.53471	0.0287745		Bmpr1a	8.33043	8.05479e-17	9.14568e-16	0.339672
														Tmem52	0.935919	0.917652	0.0287617		Ten1	8.32974	8.1021e-17	9.19444e-16	0.397105
														1810013D15Rik	0.93594	1.06936	0.0287521		Gm49083	8.32778	8.23753e-17	9.3431e-16	2.90271
														Sod3	0.935947	1.09537	0.0287489		Rnf115	8.32386	8.51449e-17	9.65204e-16	0.409959
														Gm16576	0.935991	0.613298	0.0287281		Setx	8.31964	8.82317e-17	9.99123e-16	0.399723
														Vav1	0.936222	0.0327161	0.028621		Pla2g1b	8.31892	8.87655e-17	1.00463e-15	0.386513
														Gm49625	0.936264	0.582626	0.0286018		P3h2	8.31844	8.91264e-17	1.00817e-15	0.911818
														Ccdc113	0.936408	2.17369	0.0285347		Mrpl38	8.31837	8.9185e-17	1.00829e-15	0.37644
														Pcsk2	0.936415	1.91537	0.0285315		Ftx	8.318	8.94592e-17	1.01085e-15	0.618563
														8430422H06Rik	0.936429	1.53498	0.0285251		Ino80d	8.31486	9.18575e-17	1.03739e-15	0.370282
														4930554G24Rik	0.936436	1.73048	0.0285219		Gaa	8.31419	9.23825e-17	1.04277e-15	0.437117
														Gm26911	0.93645	1.46573	0.0285155		Ubc	8.31004	9.5672e-17	1.07932e-15	0.320837
														Gvin1	0.93645	1.58579	0.0285155		Xpc	8.30975	9.59028e-17	1.08134e-15	0.490371
														Gm47675	0.936457	1.39139	0.0285123		Ptpn14	8.30723	9.79587e-17	1.10393e-15	0.800641
														Thbd	0.936464	1.35758	0.0285091		Atp5e	8.30693	9.82093e-17	1.10617e-15	0.261833
														Mup20	0.936464	1.31062	0.0285091		Bola1	8.29563	1.08011e-16	1.21591e-15	0.359417
														Gm5150	0.93647	0.899568	0.0285059		Acap2	8.29506	1.08532e-16	1.22113e-15	0.408447
														Gm14319	0.936477	1.12852	0.0285027		Ogfrl1	8.29342	1.10041e-16	1.23745e-15	0.851905
														Kcnip3	0.936477	1.15092	0.0285027		Alg5	8.28963	1.13602e-16	1.27681e-15	0.550805
														Gm4402	0.936512	0.853664	0.0284867		Dse	8.28478	1.18331e-16	1.32925e-15	0.998832
														Gm10642	0.936532	0.68206	0.0284772		Snx9	8.28375	1.19352e-16	1.34001e-15	0.411785
														Gm15987	0.936836	0.873523	0.0283365		Capns1	8.28297	1.20141e-16	1.34815e-15	0.355502
														Tmem218	0.937594	0.390845	0.0279852		Brd8	8.28218	1.20939e-16	1.35638e-15	0.358397
														Ltb	0.937694	0.693008	0.0279389		Spry2	8.28195	1.21173e-16	1.35828e-15	0.510729
														Slc25a18	0.937721	0.49727	0.0279261		Smbd1	8.27544	1.27978e-16	1.4338e-15	1.4893
														Slc35a5	0.937728	0.39877	0.0279229		Cpsf2	8.27476	1.2872e-16	1.44135e-15	0.540248
														Repin1	0.937746	0.224909	0.027915		Dnajc1	8.27276	1.30896e-16	1.46493e-15	0.339182
														Gm11099	0.938452	1.51767	0.0275879		Lrrc8c	8.27128	1.32528e-16	1.48242e-15	0.363163
														Htr2c	0.938635	0.20959	0.0275033		Golga1	8.27107	1.32765e-16	1.48427e-15	0.506247
														Mustn1	0.938649	0.936821	0.0274969		Arl4a	8.26868	1.35445e-16	1.51344e-15	0.76635
														Grm5	0.938818	0.400578	0.0274188		Ccnl1	8.26808	1.36131e-16	1.52029e-15	0.369668
														Gbp5	0.938838	0.87878	0.0274092		Med6	8.26776	1.36497e-16	1.52358e-15	0.687788
														Gm37612	0.938852	0.221621	0.0274029		Tlk1	8.26763	1.36651e-16	1.52449e-15	0.345292
														Cd80	0.938852	1.01714	0.0274029		Psma1	8.2671	1.37258e-16	1.53045e-15	0.380663
														Syt3	0.938904	0.438563	0.0273789		Tmco1	8.26496	1.39743e-16	1.55734e-15	0.362205
														Gm13855	0.939011	0.625672	0.0273295		Cyp20a1	8.26146	1.43899e-16	1.60281e-15	0.878004
														Rab42	0.939014	0.76303	0.0273279		Anapc2	8.26098	1.44485e-16	1.60805e-15	0.606985
														Ifi203	0.939173	1.65456	0.0272546		Mrpl42	8.26002	1.45649e-16	1.61973e-15	0.368072
														Gm39307	0.9392	1.30505	0.0272418		Dpp3	8.2588	1.47148e-16	1.63553e-15	0.779664
														Nlrp3	0.939269	1.18873	0.02721		Psmd14	8.25695	1.49446e-16	1.6602e-15	0.367477
														Gm17112	0.93929	0.84326	0.0272004		Zfr	8.25679	1.49641e-16	1.6615e-15	0.33489
														Gpr179	0.93929	1.05942	0.0272004		A230057D06Rik	8.24981	1.58651e-16	1.76061e-15	1.49057
														Rgs22	0.939304	1.16563	0.027194		Creb3l1	8.24951	1.59043e-16	1.76403e-15	0.450664
														Plpp4	0.939331	0.696954	0.0271813		Susd4	8.24556	1.64394e-16	1.82242e-15	0.904693
														Cers1	0.939338	0.716469	0.0271781		1110004F10Rik	8.24025	1.71847e-16	1.90405e-15	0.351653
														Gm1720	0.939455	0.218646	0.0271239		Dab2ip	8.23764	1.75634e-16	1.94499e-15	0.358209
														Arhgdib	0.939528	0.596007	0.0270904		Ide	8.23296	1.82642e-16	2.02153e-15	0.347937
														4930539M17Rik	0.939707	2.45155	0.0270076		Glrx5	8.23271	1.8302e-16	2.02464e-15	0.3829
														Il27ra	0.939707	3.08451	0.0270076		Prdx5	8.23208	1.83982e-16	2.03422e-15	0.34543
														3110006O06Rik	0.939721	2.38878	0.0270012		Cdk9	8.22842	1.89706e-16	2.09641e-15	0.607989
														Ptpn7	0.939728	1.96356	0.026998		Gsn	8.22774	1.90786e-16	2.10725e-15	0.534421
														Mcoln3	0.939728	2.14789	0.026998		Ptbp2	8.22712	1.91776e-16	2.11706e-15	0.398275
														Ccdc180	0.939728	2.16168	0.026998		Immt	8.2254	1.94534e-16	2.14639e-15	0.345585
														Tssk3	0.939728	2.53136	0.026998		Cacul1	8.22445	1.96087e-16	2.16228e-15	0.409742
														H2-Ob	0.939734	1.87084	0.0269948		Supt5	8.22439	1.96179e-16	2.16228e-15	0.364138
														Gal	0.939734	2.16763	0.0269948		Mthfd2l	8.21869	2.05741e-16	2.26649e-15	0.569748
														AU022793	0.939741	1.83079	0.0269917		Prkd3	8.21826	2.06478e-16	2.27342e-15	0.457086
														4930572G02Rik	0.939748	2.10341	0.0269885		Gstcd	8.21692	2.08796e-16	2.29773e-15	0.850306
														Gm32443	0.939755	1.7667	0.0269853		Mrps36	8.21249	2.16652e-16	2.38295e-15	0.382399
														4930430E12Rik	0.939755	1.5788	0.0269853		Naa15	8.21241	2.16793e-16	2.38325e-15	0.411725
														Zfp781	0.940145	0.517988	0.0268053		Stam	8.20887	2.2328e-16	2.45329e-15	0.42165
														Vamp2	0.940252	0.347466	0.0267559		Ube2v1	8.20863	2.23732e-16	2.45697e-15	0.408299
														Gm26802	0.940279	0.609101	0.0267432		Zkscan1	8.20579	2.29089e-16	2.51449e-15	0.40733
														Iglc1	0.940434	1.12152	0.0266716		Tulp4	8.20336	2.33763e-16	2.56446e-15	0.354329
														Lrfn1	0.940745	0.374825	0.0265283		Ehd2	8.20129	2.37817e-16	2.60758e-15	0.595527
														Ribc1	0.940855	0.50007	0.0264774		Saysd1	8.20073	2.38935e-16	2.61847e-15	0.54809
														Prrg1	0.94102	0.379693	0.026401		Nek6	8.19929	2.41802e-16	2.64852e-15	0.368549
														Pyy	0.941213	-0.490965	0.0263119		Snrnp70	8.19916	2.42072e-16	2.6501e-15	0.337538
														2410080I02Rik	0.941282	0.745019	0.0262801		Ptpa	8.19337	2.54009e-16	2.77933e-15	0.390301
														Tmeff1	0.94131	0.292848	0.0262673		Fam136a	8.18998	2.61263e-16	2.85722e-15	0.662209
														Col20a1	0.941531	0.283272	0.0261656		Pibf1	8.1858	2.70496e-16	2.95667e-15	0.412731
														Sidt1	0.941834	0.495727	0.0260256		Timm9	8.18571	2.70701e-16	2.95737e-15	0.583676
														Gm26737	0.941903	1.00328	0.0259938		Nob1	8.1851	2.72078e-16	2.97087e-15	0.785601
														Arhgap4	0.94201	0.205385	0.0259445		Grcc10	8.1846	2.73206e-16	2.98165e-15	0.317736
														Acot4	0.942165	0.522672	0.025873		Ppp1cc	8.18452	2.73392e-16	2.98214e-15	0.377103
														Prnd	0.942437	0.67	0.0257475		Kat6b	8.18173	2.798e-16	3.05045e-15	0.455949
														Ybx2	0.942517	1.27239	0.0257109		Camk1	8.18108	2.81313e-16	3.06537e-15	0.428141
														Ccr1	0.942524	1.65308	0.0257078		Tax1bp3	8.17311	3.00537e-16	3.27315e-15	0.482319
														Spata16	0.942537	1.56588	0.0257014		Kif23	8.17247	3.02139e-16	3.28768e-15	1.16631
														Fbxw22	0.942544	0.973464	0.0256982		Sf3b5	8.17245	3.02183e-16	3.28768e-15	0.371515
														Gm20692	0.942544	1.29546	0.0256982		Rnh1	8.17134	3.04985e-16	3.31646e-15	0.365871
														AC171003.1	0.942565	1.13478	0.0256887		Scai	8.17108	3.05654e-16	3.32115e-15	0.555154
														Lef1	0.942586	0.960413	0.0256792		Sumf1	8.17104	3.05731e-16	3.32115e-15	0.536369
														Prune2	0.942606	0.852792	0.0256696		Cib1	8.17061	3.06842e-16	3.3315e-15	0.387147
														Gm12992	0.942727	0.513899	0.025614		Ndufs6	8.16783	3.13988e-16	3.40732e-15	0.349534
														Disp3	0.943013	3.87027	0.0254822		Txn2	8.16598	3.18838e-16	3.45818e-15	0.3916
														Gm42817	0.943013	4.16906	0.0254822		Rest	8.16393	3.24286e-16	3.51546e-15	0.381758
														C130073E24Rik	0.943013	4.84052	0.0254822		Babam1	8.16152	3.30844e-16	3.58471e-15	0.448755
														Acsm1	0.943013	3.63615	0.0254822		Smg7	8.15874	3.38528e-16	3.66608e-15	0.385055
														Il1bos	0.943013	4.1403	0.0254822		Rab13	8.15632	3.45395e-16	3.73853e-15	0.501188
														6430531B16Rik	0.943013	4.75337	0.0254822		Psmb2	8.15621	3.45705e-16	3.73996e-15	0.344996
														Gm40645	0.943013	4.0432	0.0254822		Rims2	8.15304	3.54897e-16	3.83744e-15	0.81164
														Cd19	0.94302	3.31664	0.025479		Mia2	8.15262	3.56133e-16	3.84883e-15	0.356944
														Gm41002	0.94302	3.11089	0.025479		Cdc42se1	8.15233	3.56989e-16	3.8561e-15	0.364322
														Gm27008	0.94302	3.71246	0.025479		Socs5	8.1514	3.5975e-16	3.88394e-15	0.546809
														Gm34678	0.94302	4.36161	0.025479		Tpd52l1	8.15005	3.63782e-16	3.92545e-15	0.508601
														Gpr141	0.94302	3.51447	0.025479		Cep170b	8.14953	3.65349e-16	3.93947e-15	0.459523
														Igkv16-104	0.94302	3.19261	0.025479		Egln1	8.14949	3.65454e-16	3.93947e-15	0.394321
														Gm45155	0.94302	3.22235	0.025479		Ppm1h	8.1415	3.90415e-16	4.20638e-15	0.393692
														Pou3f1	0.94302	3.09229	0.025479		Polr1a	8.13652	4.06801e-16	4.38069e-15	0.565567
														Ccl7	0.943027	2.96061	0.0254758		Cbx3	8.13642	4.07121e-16	4.3819e-15	0.335471
														Gm11747	0.943027	3.00392	0.0254758		2025-03-07	8.13458	4.13357e-16	4.44675e-15	0.367493
														Pah	0.943027	3.00764	0.0254758		Bend7	8.13381	4.16012e-16	4.47303e-15	0.328377
														Gm28516	0.943027	2.51535	0.0254758		Ccdc124	8.12654	4.41711e-16	4.74693e-15	0.415289
														Prf1	0.943034	2.11927	0.0254727		Dhx57	8.1262	4.4296e-16	4.75793e-15	0.42695
														Tlr8	0.943034	2.20754	0.0254727		Mirg	8.12419	4.50379e-16	4.83516e-15	1.28515
														Gm33054	0.943034	1.80077	0.0254727		Spg7	8.12361	4.52508e-16	4.85554e-15	0.55684
														Emx1	0.943034	2.61736	0.0254727		Sf3b3	8.12055	4.64061e-16	4.97697e-15	0.34441
														Vit	0.943186	0.614322	0.0254028		Gemin7	8.11866	4.71374e-16	5.05284e-15	0.519307
														Gm16283	0.943406	0.366009	0.0253012		Mrpl36	8.11843	4.72233e-16	5.05947e-15	0.429271
														2810032G03Rik	0.943462	0.792524	0.0252758		Trappc2l	8.11651	4.79759e-16	5.13749e-15	0.36187
														Paqr6	0.943855	0.626989	0.0250949		Pwp1	8.11625	4.80805e-16	5.14607e-15	0.973888
														Faxc	0.944386	0.195541	0.0248506		Sipa1l1	8.11034	5.04796e-16	5.40011e-15	0.505103
														Icos	0.944506	0.572205	0.0247951		Slc7a6	8.10964	5.07684e-16	5.42825e-15	0.696237
														Gm12925	0.944724	0.723049	0.0246952		Wdr26	8.1051	5.27009e-16	5.63202e-15	0.341978
														Lrrc36	0.945072	0.530463	0.0245351		Mtap	8.10372	5.33034e-16	5.69353e-15	0.563287
														Gm42791	0.945186	0.628021	0.0244828		Ggnbp1	8.10336	5.34632e-16	5.7077e-15	1.09553
														Gm48422	0.945245	1.33072	0.0244558		Trim3	8.10286	5.36827e-16	5.72823e-15	0.499254
														Zfp811	0.94532	1.09667	0.024421		Rapgef1	8.10276	5.37267e-16	5.73003e-15	0.621277
														Glp2r	0.945603	0.140785	0.0242911		Nae1	8.102	5.40627e-16	5.76295e-15	0.425917
														Lrig3	0.945724	0.501737	0.0242356		Mrpl23	8.10129	5.43775e-16	5.79358e-15	0.360573
														Fam183b	0.945821	1.41169	0.0241913		Slirp	8.10064	5.46727e-16	5.82209e-15	0.396623
														Mcidas	0.945827	1.63841	0.0241881		Nfs1	8.09848	5.5651e-16	5.92328e-15	0.631011
														Tspoap1	0.945841	1.6014	0.0241818		Psmc2	8.09833	5.57184e-16	5.92746e-15	0.393419
														Lair1	0.945848	1.56738	0.0241786		Anapc1	8.0939	5.77829e-16	6.14399e-15	0.434192
														Igf2	0.945869	1.0118	0.0241691		Zscan26	8.09307	5.81791e-16	6.183e-15	0.373394
														Notumos	0.94589	0.931321	0.0241596		Spata6	8.09275	5.83304e-16	6.19596e-15	0.617935
														Dtx3l	0.946379	0.335761	0.0239348		Ap2s1	8.08616	6.15732e-16	6.53712e-15	0.342919
														Spag6	0.946752	0.687682	0.0237638		Parp1	8.08437	6.24884e-16	6.63094e-15	0.647274
														Rbmx	0.947694	0.359148	0.0233321		Hk1	8.08398	6.26864e-16	6.64861e-15	0.567365
														Eqtn	0.948104	0.764816	0.023144		Stau2	8.083	6.31943e-16	6.69812e-15	0.486712
														Sdc3	0.948615	1.49441	0.0229102		Ndufb5	8.08295	6.32168e-16	6.69812e-15	0.321213
														Gpr132	0.948663	0.781508	0.0228881		Polk	8.07639	6.67127e-16	7.06498e-15	0.704794
														Gm50146	0.94867	1.27637	0.0228849		Rps19bp1	8.07625	6.67886e-16	7.06946e-15	0.39869
														9130213A22Rik	0.94867	0.811004	0.0228849		Ahcyl1	8.07567	6.71072e-16	7.09962e-15	0.399701
														Spata46	0.948787	0.523326	0.0228312		Kdelr1	8.07519	6.73722e-16	7.12409e-15	0.356711
														2410124H12Rik	0.948787	0.481442	0.0228312		Ston2	8.07498	6.74895e-16	7.13292e-15	0.724274
														Rgs17	0.948801	0.400676	0.0228249		Kidins220	8.07488	6.75447e-16	7.13517e-15	0.41756
														3100003L05Rik	0.949105	2.49935	0.0226859		Ptpn18	8.07435	6.78355e-16	7.1623e-15	0.373145
														Smcp	0.949105	1.89053	0.0226859		Rgl1	8.0664	7.24027e-16	7.64069e-15	1.80513
														Sorcs3	0.949111	2.07341	0.0226828		Actr10	8.06554	7.2913e-16	7.6907e-15	0.423938
														Stk33	0.949111	2.57126	0.0226828		Ccnl2	8.0639	7.38996e-16	7.79087e-15	0.374511
														Gm17200	0.949111	1.65565	0.0226828		Tbrg1	8.06347	7.41595e-16	7.81436e-15	0.340675
														Mgl2	0.949118	2.31226	0.0226796		Zfp236	8.06034	7.60823e-16	8.01296e-15	0.555433
														Clec4a3	0.949125	1.92495	0.0226765		Sqor	8.05869	7.71139e-16	8.11756e-15	0.597932
														Pcdhb20	0.949125	2.0616	0.0226765		Prkrip1	8.05801	7.75469e-16	8.15906e-15	0.556177
														Trem1	0.949125	2.36873	0.0226765		Myh13	8.05757	7.78277e-16	8.18452e-15	1.36998
														Pira2	0.949132	1.74526	0.0226733		Orm1	8.05725	7.80293e-16	8.20163e-15	1.00509
														Fgf16	0.949132	1.38825	0.0226733		Gm26632	8.05518	7.93647e-16	8.33785e-15	0.498079
														Gm15522	0.949132	1.84338	0.0226733		Bud31	8.05291	8.08458e-16	8.48921e-15	0.385214
														Gm10687	0.949132	1.58991	0.0226733		Gab1	8.04744	8.45457e-16	8.8733e-15	0.352776
														Gm46555	0.949132	1.62256	0.0226733		Suclg2	8.04686	8.49446e-16	8.91073e-15	0.349587
														Vipr1	0.949132	1.21406	0.0226733		Map3k2	8.04676	8.50138e-16	8.91355e-15	0.389449
														D030047H15Rik	0.949132	1.77111	0.0226733		Bmpr2	8.04446	8.66262e-16	9.07809e-15	0.333134
														Hey2	0.949132	1.68573	0.0226733		Ube2d3	8.04342	8.73648e-16	9.15095e-15	0.334894
														Itgae	0.949132	0.645969	0.0226733		Arl2	8.04279	8.78171e-16	9.19376e-15	0.369834
														Gpr37l1	0.949139	1.61593	0.0226702		Dennd1a	8.03755	9.16495e-16	9.59022e-15	0.349033
														Klrk1	0.949139	1.56304	0.0226702		Ttf1	8.0329	9.51915e-16	9.95591e-15	0.574223
														Ttc30a2	0.949146	1.45931	0.022667		Tmem135	8.03145	9.63247e-16	1.00694e-14	0.339059
														1700047G03Rik	0.949146	1.56781	0.022667		Myo3b	8.02864	9.85615e-16	1.02982e-14	1.39159
														Myadml2	0.949146	1.89159	0.022667		Clic5	8.02776	9.92705e-16	1.03671e-14	0.479712
														1700024I08Rik	0.949146	1.51819	0.022667		Uqcrq	8.0179	1.07572e-15	1.12285e-14	0.334987
														Sema3g	0.94916	1.83245	0.0226607		Tbl1x	8.01577	1.0945e-15	1.14189e-14	0.337237
														Spef2	0.94916	2.27943	0.0226607		Numa1	8.01414	1.10911e-15	1.15656e-14	0.358841
														Sirpb1b	0.949167	1.22426	0.0226575		Eef1akmt1	8.01187	1.12974e-15	1.17749e-14	0.578841
														Duox2	0.949167	0.848758	0.0226575		Epb41l4a	8.00924	1.15416e-15	1.20235e-14	0.645929
														Gm33206	0.949174	1.09789	0.0226544		Ppil3	8.00909	1.15563e-15	1.20328e-14	0.67386
														Cd200r4	0.949174	0.843095	0.0226544		Tusc3	8.00901	1.15636e-15	1.20345e-14	0.363889
														Krt4	0.949187	0.411195	0.0226481		Guk1	8.00889	1.15746e-15	1.204e-14	0.373094
														Msx3	0.949187	0.632149	0.0226481		Bdp1	8.00634	1.18177e-15	1.22868e-14	0.360316
														Sema3f	0.949501	0.198315	0.0225044		Hpn	8.00524	1.1923e-15	1.23902e-14	0.675398
														Ube2e2	0.949933	0.0539204	0.0223072		Galnt1	8.0037	1.20738e-15	1.25407e-14	0.379284
														Olfr66	0.950033	0.325714	0.0222615		Synj2bp	8.00159	1.22826e-15	1.27512e-14	0.377125
														Ffar2	0.95036	0.427365	0.0221117		Timm8b	7.99993	1.24492e-15	1.29179e-14	0.326753
														Itgb2	0.950612	0.983845	0.0219966		Thrb	7.99905	1.25385e-15	1.30041e-14	0.440469
														Gm45311	0.950695	0.770014	0.0219587		Asl	7.99637	1.2814e-15	1.32834e-14	0.683538
														Amz1	0.950875	0.37891	0.0218768		Alkbh1	7.99249	1.32242e-15	1.36951e-14	0.474254
														Scml4	0.951147	0.507665	0.0217523		Vps72	7.9918	1.32979e-15	1.37646e-14	0.448366
														Cd300lb	0.951164	0.492561	0.0217444		Lman2l	7.98476	1.40798e-15	1.45597e-14	0.744139
														Gm19684	0.951206	0.0815027	0.0217255		Rac3	7.98267	1.43201e-15	1.4801e-14	0.436647
														Syne3	0.951327	0.944847	0.0216704		Mrps6	7.98094	1.45222e-15	1.50024e-14	0.624415
														Negr1	0.95134	1.07753	0.0216641		Ddx54	7.97882	1.47736e-15	1.52547e-14	0.42715
														1500009L16Rik	0.95144	0.18243	0.0216184		Baz1b	7.97168	1.56529e-15	1.61548e-14	0.346537
														Gm48045	0.951513	0.58482	0.0215853		2610001J05Rik	7.96887	1.60137e-15	1.65191e-14	0.55086
														Grin1os	0.951875	1.39162	0.02142		Smc5	7.96488	1.65385e-15	1.7052e-14	0.504705
														Hrh1	0.951896	1.18099	0.0214105		Gstm2	7.96215	1.69082e-15	1.74247e-14	1.00299
														Il1f9	0.95191	1.50264	0.0214042		Snap23	7.95921	1.73144e-15	1.78346e-14	0.37171
														Gm50138	0.951917	0.98894	0.0214011		Tmed5	7.95838	1.74306e-15	1.79455e-14	0.413372
														Gm34397	0.951944	1.28464	0.0213885		Acot13	7.95791	1.74973e-15	1.80053e-14	0.35348
														Arhgap9	0.951951	1.28846	0.0213853		Mphosph8	7.94967	1.87014e-15	1.92351e-14	0.355871
														Gemin4	0.951972	1.15867	0.0213759		Prmt5	7.94556	1.93317e-15	1.98736e-14	0.701182
														Rab33a	0.951986	0.853386	0.0213696		Wdr45b	7.94223	1.98583e-15	2.0405e-14	0.459689
														Gm39363	0.952006	1.04875	0.0213601		Myo9b	7.94123	2.00178e-15	2.05589e-14	0.487775
														Gm15472	0.952069	0.26328	0.0213318		Ppp2r2a	7.94077	2.00928e-15	2.06259e-14	0.344344
														Ajm1	0.952417	3.17695	0.0211728		Rsrc1	7.93909	2.03662e-15	2.08964e-14	0.335512
														Wfdc10	0.952417	3.04393	0.0211728		Calr	7.93869	2.04325e-15	2.09542e-14	0.356552
														Gm40040	0.952417	2.7868	0.0211728		Yeats4	7.93846	2.04711e-15	2.09836e-14	0.334135
														Gm10440	0.952424	2.33862	0.0211697		Aip	7.93647	2.08026e-15	2.1313e-14	0.433241
														Ccl22	0.952431	2.11538	0.0211665		Lonp1	7.93627	2.0836e-15	2.13369e-14	0.775627
														D630011A20Rik	0.952431	2.07291	0.0211665		Lamtor1	7.93532	2.09952e-15	2.14895e-14	0.346095
														Gm3252	0.952431	1.80544	0.0211665		Mrto4	7.93113	2.17167e-15	2.22172e-14	0.539858
														Spata18	0.952431	3.32272	0.0211665		Gjb3	7.92972	2.19643e-15	2.24596e-14	0.985275
														Gm26685	0.952431	2.81391	0.0211665		Nifk	7.92632	2.25733e-15	2.306e-14	0.59263
														Jam3	0.952431	2.02555	0.0211665		Sfi1	7.92561	2.27027e-15	2.31795e-14	0.654365
														Gm12305	0.952431	1.85602	0.0211665		Col4a2	7.92556	2.27122e-15	2.31795e-14	0.340779
														Gm48829	0.952431	2.39258	0.0211665		Ndufa12	7.92462	2.28839e-15	2.33434e-14	0.343792
														4930461G14Rik	0.952431	2.61608	0.0211665		Rbbp7	7.92278	2.32263e-15	2.36812e-14	0.350574
														Ncr1	0.952438	1.58532	0.0211634		Cetn3	7.92194	2.33831e-15	2.38295e-14	0.381685
														Gm29695	0.952438	1.81804	0.0211634		Aktip	7.91992	2.3766e-15	2.4208e-14	0.595261
														Rbfaos	0.952438	2.15764	0.0211634		Cmbl	7.91937	2.38722e-15	2.43045e-14	1.93995
														Gm16118	0.952438	1.31478	0.0211634		Eif2b2	7.9135	2.50259e-15	2.54668e-14	0.639306
														5730435O14Rik	0.952445	2.31215	0.0211603		Hras	7.9062	2.65356e-15	2.699e-14	0.338288
														Tmem255b	0.952445	1.88487	0.0211603		Tmem134	7.90602	2.65753e-15	2.70174e-14	0.36455
														Gm5600	0.952445	1.2721	0.0211603		Dhx40	7.90333	2.71546e-15	2.7593e-14	0.349272
														Gm4793	0.952452	1.68514	0.0211571		Iws1	7.90211	2.74213e-15	2.78505e-14	0.42367
														Syce1	0.952452	1.44129	0.0211571		Fyttd1	7.90141	2.75761e-15	2.79944e-14	0.32471
														Gm20632	0.952493	0.845138	0.0211382		Prxl2c	7.90027	2.78294e-15	2.82379e-14	0.523938
														Nuak1	0.952638	0.361668	0.0210721		Cox14	7.90011	2.78652e-15	2.82606e-14	0.340981
														Jaml	0.952645	0.520354	0.021069		Sertad2	7.89385	2.93012e-15	2.97026e-14	0.587717
														Gm47507	0.9527	0.688012	0.0210438		Atf4	7.89323	2.94471e-15	2.98362e-14	0.393526
														Fgg	0.953038	0.532512	0.0208897		Ino80b	7.89304	2.94921e-15	2.98675e-14	0.463117
														Dnajb5	0.953542	0.429947	0.0206601		Mob1a	7.89095	2.99889e-15	3.0356e-14	0.37064
														0610025J13Rik	0.953756	0.439889	0.0205627		Ncstn	7.88939	3.0366e-15	3.07083e-14	0.60091
														Tmem51os1	0.954122	0.657783	0.0203961		Nek7	7.88901	3.046e-15	3.07886e-14	0.341535
														Kcnn1	0.954364	0.348947	0.0202862		Micu1	7.88644	3.10924e-15	3.14127e-14	0.510081
														Gm13610	0.954384	0.575578	0.0202767		Syngr1	7.88421	3.1653e-15	3.19637e-14	0.428918
														Mdga2	0.954578	1.38692	0.0201888		Zfp91	7.88371	3.17795e-15	3.20762e-14	0.344359
														Phf11b	0.954785	0.771169	0.0200946		Nedd4	7.88228	3.21465e-15	3.24311e-14	0.304486
														Gm42738	0.954785	0.693455	0.0200946		Reep6	7.87871	3.30772e-15	3.33381e-14	0.81732
														Cd163l1	0.954785	0.722003	0.0200946		Nfat5	7.8777	3.33455e-15	3.35924e-14	0.327266
														Apoa4	0.955047	-0.51496	0.0199753		Morf4l2	7.86839	3.5923e-15	3.61717e-14	0.346327
														Gm43136	0.955185	1.56083	0.0199125		Arhgef26	7.86749	3.61826e-15	3.64158e-14	0.446601
														C5ar1	0.95522	1.44184	0.0198968		Rbfox2	7.86511	3.68769e-15	3.70968e-14	0.315526
														Tmem108	0.95522	1.24182	0.0198968		Zfp740	7.86406	3.7187e-15	3.7391e-14	0.631601
														Tssk1	0.955247	1.09246	0.0198843		Ube2s	7.86114	3.80645e-15	3.8255e-14	0.366557
														Prss32	0.955254	0.809647	0.0198811		Wdr74	7.86033	3.83128e-15	3.84863e-14	0.685947
														D6Ertd474e	0.955254	1.42499	0.0198811		2310002F09Rik	7.85947	3.85762e-15	3.87323e-14	1.25648
														Gm47808	0.955254	1.22983	0.0198811		Ssbp1	7.85302	4.06127e-15	4.07577e-14	0.325118
														Ly86	0.955261	1.02384	0.019878		Eef1e1	7.85123	4.11979e-15	4.13253e-14	0.791915
														Ccdc27	0.955268	0.710645	0.0198748		Fam120a	7.84658	4.27536e-15	4.28654e-14	0.347488
														Gm43031	0.955268	0.830524	0.0198748		Fkbp8	7.84595	4.29682e-15	4.30601e-14	0.34176
														Gm15726	0.955268	0.867991	0.0198748		Oip5os1	7.84312	4.39494e-15	4.40225e-14	0.325754
														Cd33	0.955282	1.16073	0.0198686		Katnbl1	7.84089	4.47345e-15	4.47876e-14	0.485612
														Olfr784	0.955282	0.758369	0.0198686		Slc25a26	7.83992	4.50847e-15	4.51168e-14	0.734185
														Ccdc144b	0.955282	1.08899	0.0198686		Emc7	7.83875	4.55067e-15	4.55175e-14	0.351423
														Rnase6	0.955282	0.926018	0.0198686		Tut7	7.8378	4.58518e-15	4.58409e-14	0.323066
														Gm10143	0.955289	0.999693	0.0198654		Klf5	7.83627	4.64119e-15	4.63601e-14	0.368863
														Gm26566	0.955295	1.15997	0.0198623		Cycs	7.83626	4.64151e-15	4.63601e-14	0.358667
														Dchs2	0.955323	0.383109	0.0198497		Sco2	7.83168	4.81379e-15	4.80581e-14	1.12756
														B3galt5	0.955323	0.515752	0.0198497		Fam120b	7.82811	4.95245e-15	4.9419e-14	0.418769
														Dixdc1	0.955327	0.245869	0.0198482		Hnf1aos1	7.82743	4.97948e-15	4.96652e-14	1.29119
														Gm34882	0.955344	0.674548	0.0198403		Rbp1	7.82645	5.01857e-15	5.00315e-14	0.697266
														Tmem45a	0.955717	20.1909	0.0196709		Urm1	7.82445	5.0989e-15	5.08082e-14	0.777907
														Six1	0.955717	19.5315	0.0196709		Mrps17	7.82372	5.12848e-15	5.10789e-14	0.389877
														Tekt3	0.955717	18.7076	0.0196709		Taf11	7.82245	5.1803e-15	5.15707e-14	0.641706
														5430402P08Rik	0.955717	20.0319	0.0196709		Kcmf1	7.8214	5.22383e-15	5.19794e-14	0.324939
														Gm12823	0.955717	19.0362	0.0196709		Cd44	7.81948	5.30428e-15	5.2755e-14	0.329416
														C230072F16Rik	0.955717	20.3935	0.0196709		Adam9	7.81836	5.35158e-15	5.32004e-14	0.486169
														Abcg3	0.955717	19.4613	0.0196709		Elovl7	7.81715	5.40321e-15	5.36883e-14	0.561131
														Qprt	0.955717	19.0022	0.0196709		Pold4	7.81681	5.41792e-15	5.38091e-14	0.499516
														Gm44837	0.955717	18.2043	0.0196709		Ube2r2	7.81614	5.4467e-15	5.40695e-14	0.334202
														Heyl	0.955717	19.0466	0.0196709		Tomm6	7.81505	5.49431e-15	5.45165e-14	0.351573
														Gpr61	0.955717	18.2777	0.0196709		Kras	7.80961	5.73661e-15	5.68672e-14	0.339709
														Adgb	0.955717	19.2934	0.0196709		Rab6a	7.80905	5.76211e-15	5.70931e-14	0.347375
														Capn3	0.955755	0.788773	0.0196536		Zfp618	7.80841	5.7913e-15	5.73553e-14	0.556633
														Gm15408	0.956386	0.499413	0.0193667		Wnk4	7.80729	5.84308e-15	5.7841e-14	0.701288
														Gm16048	0.956538	0.903225	0.0192977		Tmem147	7.80414	5.99087e-15	5.92761e-14	0.365161
														Gm15477	0.956662	0.47748	0.0192413		Pepd	7.79977	6.2021e-15	6.13374e-14	0.570356
														Pik3c2b	0.956956	0.368561	0.0191081		Csnk1d	7.79954	6.21319e-15	6.14182e-14	0.365905
														Gm15902	0.95718	0.633603	0.0190063		Slc25a27	7.79638	6.37062e-15	6.29155e-14	0.844036
														Gm29443	0.957229	0.187085	0.0189844		Zdhhc12	7.79574	6.40328e-15	6.32084e-14	0.879241
														Gm49201	0.957398	0.829369	0.0189076		Wdr70	7.7876	6.82932e-15	6.73824e-14	0.35199
														Caskin1	0.957405	0.884935	0.0189045		Ube4b	7.7845	6.99875e-15	6.90218e-14	0.348261
														5430431A17Rik	0.957522	0.22944	0.0188513		Zdhhc6	7.78436	7.00691e-15	6.907e-14	0.362868
														Gm29683	0.957598	0.582638	0.0188168		Rprd2	7.78414	7.01892e-15	6.91561e-14	0.33699
														Gm16793	0.957646	0.452684	0.0187949		Zfp821	7.78045	7.22682e-15	7.11711e-14	0.821681
														Asic1	0.957667	0.423273	0.0187855		Otud4	7.77999	7.25285e-15	7.13942e-14	0.3496
														Cyp27a1	0.957953	1.47061	0.0186556		Strap	7.77908	7.30545e-15	7.18784e-14	0.427202
														Efhc2	0.957967	1.05105	0.0186493		Trappc1	7.77742	7.40164e-15	7.27908e-14	0.410239
														Gm30794	0.958016	1.00711	0.0186274		Cops4	7.77582	7.49599e-15	7.36844e-14	0.379683
														Btbd16	0.958064	0.843573	0.0186055		Plod3	7.77549	7.51552e-15	7.38419e-14	0.782915
														Hbb-bs	0.958078	0.733459	0.0185992		Arglu1	7.77449	7.57492e-15	7.43908e-14	0.331287
														Gm26744	0.958509	1.81038	0.0184037		Rbm28	7.77092	7.79154e-15	7.64826e-14	0.366319
														Gm40578	0.958537	1.40364	0.0183912		Srek1	7.77056	7.81396e-15	7.6667e-14	0.332305
														Cyp2j9	0.958537	1.01327	0.0183912		Elavl1	7.76598	8.10131e-15	7.94494e-14	0.326851
														Gm31452	0.958544	1.80044	0.018388		Stk4	7.76491	8.17029e-15	8.00886e-14	0.364548
														Clec4a2	0.958551	1.52521	0.0183849		Sh2d4a	7.76425	8.21285e-15	8.04684e-14	0.318036
														Olfr1420	0.958551	1.38206	0.0183849		Tars	7.76392	8.23422e-15	8.06403e-14	0.514913
														Gm29773	0.958558	1.23956	0.0183818		Slc9a3r1	7.76241	8.33302e-15	8.157e-14	0.445859
														Gm11685	0.958558	1.39171	0.0183818		Szrd1	7.76	8.49314e-15	8.30988e-14	0.370097
														Arl11	0.958558	1.28674	0.0183818		Jmjd7	7.75887	8.56891e-15	8.38012e-14	0.851672
														Themis2	0.958565	1.27204	0.0183786		Sh3rf1	7.75768	8.64978e-15	8.45483e-14	0.334721
														Gm50350	0.958565	1.11532	0.0183786		Heatr5a	7.75763	8.65332e-15	8.45483e-14	0.478764
														9330154K18Rik	0.958571	1.09606	0.0183755		Rai1	7.75564	8.79003e-15	8.58443e-14	0.41625
														Clec5a	0.958571	1.06727	0.0183755		Fbxo38	7.75558	8.79423e-15	8.58456e-14	0.474613
														Lrrc4b	0.958578	0.921358	0.0183724		Psmg3	7.75518	8.8219e-15	8.60758e-14	0.666183
														Nat8f2	0.958592	0.873992	0.0183661		Tpm3-rs7	7.75266	8.99862e-15	8.77595e-14	0.45335
														AU015836	0.958627	0.359205	0.0183505		Taf15	7.7495	9.22561e-15	8.99316e-14	0.316246
														Best3	0.958634	0.18903	0.0183474		Actg1	7.74897	9.26378e-15	9.02619e-14	0.313181
														Gm44812	0.958817	0.269907	0.0182645		Samd4	7.74794	9.33962e-15	9.09588e-14	0.642394
														Gm47123	0.959113	0.607694	0.01813		Brd3	7.74781	9.34918e-15	9.10099e-14	0.361761
														Fabp4	0.959493	0.975971	0.0179581		Tyw1	7.74768	9.35843e-15	9.10579e-14	0.730614
														9430037G07Rik	0.959756	0.512176	0.0178393		Tsn	7.74673	9.42924e-15	9.16874e-14	0.326932
														5430425K12Rik	0.960122	0.943573	0.0176737		Dhrs7	7.74669	9.43182e-15	9.16874e-14	0.483649
														Frg2f1	0.960142	0.335083	0.0176644		Smap1	7.74572	9.50415e-15	9.23479e-14	0.3203
														Lst1	0.960177	0.968886	0.0176487		Akap8l	7.74557	9.5155e-15	9.24156e-14	0.346635
														Gm16214	0.960211	0.774304	0.0176331		Cyba	7.74515	9.54703e-15	9.26365e-14	0.289952
														Slc7a15	0.960274	0.550797	0.017605		2210408F21Rik	7.74279	9.72609e-15	9.43305e-14	0.432573
														Gm24362	0.960412	0.409182	0.0175426		Ube2j2	7.74265	9.73671e-15	9.43901e-14	0.448995
														Ptk6	0.960453	0.450408	0.0175238		Btrc	7.74076	9.88282e-15	9.57626e-14	0.469144
														Ccdc7a	0.960474	0.648127	0.0175145		Mrps34	7.73373	1.04443e-14	1.01157e-13	0.343855
														Gm14102	0.96055	0.471747	0.0174801		Eif4g3	7.73285	1.05164e-14	1.01808e-13	0.355101
[truncated: 19,087 more rows]

## Sheet: ST5 - scRNA signature
at1_angelidis	at2_angelidis	at2_han	at1_han	at2_strunz	at1_strunz	Maynard et al Residual Disease
Rtkn2	Sftpc	Sftpc	Ager	Sftpc	Ager	Cldn18
Akap5	Sftpa1	Sftpa1	Igfbp2	Sftpa1	Akap5	Ager
Scnn1g	Cxcl15	Sftpb	Hopx	Slc34a2	Clic5	Aqp4
Igfbp2	Lyz1	Lyz2	Gprc5a	Sftpb	Rtkn2	Sftpd
Flrt3	Sftpb	Cxcl15	Vegfa	Cxcl15	Vegfa	Sftpb
Scel	Sftpd	Slc34a2	Cyp2b10	Hc	Cldn18	Sftpc
Spock2	Slc34a2	Lamp3	Spock2	Chi3l1	Emp2	Nkx2-1
Pdpn	Chi3l1	Chil1	Krt7	Lyz1	Spock2	Bmp4
Lama3	Hc	Sftpd	Emp2	Scd1	Timp3	Aqp1
Plod2	Scd1	Napsa	Aqp5	Lamp3	Lmo7	Nfix
Col4a3	Lamp3	Scd1	Pdpn	Sfta2	Col4a3	Dlc1
Hopx	Sfta2	Sfta2	Clic5	S100g	Igfbp2	Selenbp1
Vegfa	S100g	Dram1	Cryab	Sftpd	Hopx	Cav1
Cyr61	Napsa	S100g	Pmp22	Napsa	Krt7	Susd2
Abca5	Lpcat1	Lpcat1	Pdgfa	Lpcat1	Hbegf	Cyp4b1
Bdnf	Dram1	Lyz1	Sparc	Lgi3	Limch1
Pxdc1	Npc2	Rnase4	Sec14l3	Fasn	Pdpn
Krt7	Lgi3	Hc	Scnn1a	Dram1	Sdpr
Myo1b	Atp1b1	Fabp5	Tspan8	Cldn18	Gprc5a
Sema3a	Fasn	Bex4	Col4a3	Atp1b1	Ndnf
Col4a4	Cldn18	Mid1ip1	Ndnf	Abca3	Scnn1g
Dusp7	Ager	Elovl1	Clic3	Egfl6	Rgcc
Fbln5	Lyz2	Ptprf	Sdpr	Alcam	Pmp22
Cped1	Rnase4	Atp1b1	Rtkn2	Cpm	Cyr61
Clic5	Egfl6	Wfdc2	Scnn1g	Ppp1r14c	Prdx6
Ndnf	Lcn2	Gm43085	Cyp4b1	Selenbp1	Cyp4b1
Cryab	Il33	Lgi3	Agrn	Ager	Cryab
Pmp22	Bex4	Bex2	Prdx6	Ptprf	Sema3e
Sparc	Ppp1r14c	Prnp	Cav1	Bex4	Fbln5
Sema3e	Abca3	Egfl6	Icam1	Cbr2	Syn3
Col4a5	Elovl1	Fasn	Fam174b	Mid1ip1	Igfbp7
Timp3	Muc1	Muc1	Mal2	Muc1	Sparc
Hs2st1	Rgcc	Car8	Lmo7	Atp8a1	Icam1
Dnm3	Wbp5	Il33	Igfbp7	Zdhhc3	Scnn1a
Lmo7	Cpm	Cox6a2	Timp3	Errfi1	Clic3
Fam189a2	Chia	Ppp1r14c	Dag1	Rnase4	Scd2
Ager	Zdhhc3	Tceal9	Sema3e	Rgcc	Myo1b
Gprc5a	Errfi1	Abca3	Igfbp6	Acoxl	Col4a2
Ndst1	Mid1ip1	Npc2	Col4a4	Wfdc2	Cav1
Limch1	Alcam	Chia1	Limch1	Bex2	Col4a4
Rusc2	Acoxl	Cbr2	Galnt18	Etv5	Cyp2b10
Cldn18	Ptprf	Cldn3	Fbln5	Ank3	Cadm1
Tmod1	Prnp	Sdc1	Bcam	Npc2	Col4a5
Fam174b	Ctsh	Irx1	Pxdc1	Neat1	Pxdc1
Sphk1	Apoc1	Etv5	Ehd2	Chia	Tmem37
Emp2	Scd2	Chchd10	Cldn18	Wbp5	Slc39a8
Slc39a8	Neat1	Zdhhc3	Col4a2	Elovl1	Mal2
Wipf3	Acsl4	Cmtm8	Krt19	Irx1	Flrt3
Sdpr	Acot7	Pi4k2b	Hs2st1	Pla2g1b	Tspan8
Phactr1	Fabp5	Socs2	Akap5	Prnp	Gramd2
Agrn	Etv5	Gde1	Itga3	Il33	Aqp5
Tead1	Socs2	Ces1d	Lamc2	Ccdc141	Ctgf
Col4a2	Irx1	Lrg1	Slc39a8	Apoc1	Sec14l3
Hbegf	Abcd3	Acot7	Myh14	Abcd3	F2r
Cadm1	Selenbp1	Pla2g1b	Lama3	Socs2	Tjp1
Syn3	Atp8a1	Gclc	Tppp3	Car8	Crip2
Hspg2	Wfdc2	Cpm	Myo1b	Mettl7a1	Mettl7a1
Tmem140	Cd36	Apoc1	Slco3a1	Scd2	Tead1
Npnt	Cbr2	Fgfr2	Col4a1	Pi4k2b	Npnt
Scnn1b	Actb	Grb14	Tmem37	Atp11a	Neat1
Tef	B2m	Cldn18	Flrt3	Nkx2-1	Slc6a14
Scnn1a	Tmsb10	Cd36	Cystm1	Atp6v1c2	Myh14
Cav1	Rbpjl	Lcn2	Npnt	Ces1d	Cdkn2b
Mal2	Pla2g1b	Atp11a	S100a6	Kcnj15	Fam189a2
Pard6b	Bex2	Slc31a1	Ppp3ca	Aox3	Pvrl3
Clic3	Ank3	Mlc1	Crip2	Acsl4	Mthfd1
Prdx6	Tgoln1	Nkx2-1	Fads3	Rbpjl	Dag1
Slc6a14	Sdc1	Tmem243	Nectin3	Cldn3	Col4a1
Plce1	Pi4k2b	Spint2	Tmod1	Enpep	Agrn
F2r	Atp11a	Acoxl	Cadm1	Slc12a2	2810474O19Rik
Nbl1	Car8	Ank3	Myo1c	Tspan11	F3
Pxdn	Kcnj15	Tgoln1	Fam189a2	Lrp2	Cped1
Rgcc	Vim	Abcd3	Mthfd1	Cat	Tns1
Gramd2	Lrp2	Errfi1	Phactr1	Tgoln1	Tef
Ccdc92	Itih4	Ctsh	Scnn1b	Cd36	Dusp7
Cyp4b1	Sdc4	Ctnnb1	Tns1	Sdc1	Plod2
Ctgf	Cox6a2	Mettl7a1	Hspg2	Lpin2	Lpin2
Mthfd1	Enpep	Acsl4	Nbl1	Itih4	Tmod1
Cd59a	Tspan11	Itih4	Scd2	Cyp2b10	Sema3a
Dag1	Mlc1	Ang	Anxa3	Tmem243	Scnn1b
Igfbp6	Cd52	Smim6	Ano1	Ppp1r9a	Cystm1
Tspan15	Ctss	Tpm1	Slc44a2	Chchd10	Lama3
Neat1	Lrg1	Tfrc	Nt5e	Phldb2	Sema3b
Gm14964	mt-Nd2	Alcam	F11r	Prr15l	Ndst1
Tmem37	Atp6v1c2	Scd2	Slc39a4	Lrrk2	Lamc2
Tnfrsf12a	Ccdc141	Exosc7	Pgrmc1	Snx25	Fgf1
Tns1	Tmem243	Adk	Myl12a	Mlc1	Pdgfa
S100a6	Nkx2-1	Rbpjl	Mfge8	Cox6a2	Selenbp1
Fstl3	Aqp5	Atp8a1	Neat1	Prrg3	Mecom
Tjp1	Fgfr2	RP24-381P6.1	Hist1h2bc	Gpr116	Fam174b
Otud7b	Gclc	Mme	Cdh13	Acot7	Ppp3ca
Crip2	Npw	H2afj	Anxa5	Myh14	Serpinb9
Icam1	Psap	Sdc4	Rgcc	Lcn2	Rab11fip1
Scd2	Pmvk	Fdps	Timp2	Npw	Nebl
Col4a1	H2afj	Atp6v1c2	Thbs3	Snhg11	Alcam
Cyp2b10	Phldb2	Neat1	Lamb3	mt-Nd2	Fads3
Zfyve21	Cldn3	Slc39a8	Cxadr	C6	Ppp1r9a
Akr1c14	Slc12a2	Cat	Sema3a	Aqp5	Qk
Pdgfa	Lrrk2	Ctsc	Tmprss2	Oat	Akr1c14
Fgf1	Prr15l	Cystm1	Hbegf	Cmtm8	Mpp5
Trim16	Lpin2	Nucb2	Slc6a14	Exosc7	Malat1
Dab2ip	Crip1	Irx3	Pdlim2	Cadm1	Pard6b
Mettl7a1	Prrg3	Lrp2	Tacstd2	Fgfr2	4930523C07Rik
Sec14l3	Oat	Npw	Ptrf	Adk	Serpinb6b
Mpp5	Tyrobp	Enpep	Prmt2	Acly	Anxa3
Rab11fip1	Laptm5	Iah1	Ndst1	Ahcyl2	Thbs3
Myh14	Chchd10	Oat	Cdipt	Gas6	Tnfrsf12a
Thbs3	Snhg11	Irx2	Scel	Sdc4	Scel
Arhgef26	Ppp1r9a	Aqp5	AU021092	Arhgef38	Krt19
Anxa5	Ptprc	Krt8	Rab11fip1	Gclc	2200002D01Rik
Ppp3ca	Snx25	Oaz2	Il17re	Gde1	Magi3
2810474O19Rik	Gde1	Selenbp1	Gramd2	Slc31a1	Tspan2
Nebl	Adk	Scp2	Paqr7	Smim6	Tacstd2
Igfbp7	Gas6	Kcne2	Matn4	Pmvk	Serinc2
Mfge8	C6	Mgst1	Capn2	Atp7b	Ier3
Lpin2	Fxyd5	Ociad2	Anxa1	Malat1	Cnn2
Gab1	Gpr116	mt-Tp	Lims2	Gstt1	Tmem140
Magi3	Nrn1	Mbip	Pls3	Ctsh	Liph
4930523C07Rik	Iah1	Snx25	2210011C24Rik	Nedd4l	Ptprf
Cxadr	Cat	Cd63	Tspan2	Ang	Hist1h2bc
Qk	Ces1d	Acsl5	Serpinb6b	Cdh1	Ctnna1
Tspan8	Srgn	Rgcc	Pard6b	Pfkfb2	Abca5
Ano1	Acly	Bex3	Mettl7a1	Acot1	Amer1
Tfdp2	Slc31a1	Acly	Bdnf	Slc15a2	Rnf214
Tada2a	Ang	Tnfaip1	Fgf1	Abhd2	Phldb2
2200002D01Rik	Cyp2b10	Avpi1	Cav2	Secisbp2l	Tmem63b
Anxa3	Ahcyl2	mt-Nd2	Alcam	Lmo7	Pgrmc1
Epb4.1l4a	Ccl6	Dcxr	Arhgef26	Myo5c	Bdnf
Prrc2b	Arhgdib	Sec14l4	Qk	Nkd1	Lox
Wwp1	Fdps	Cd200	Fstl3	Fdps	Nbl1
Pvrl3	Cd63	Tmem50b	Sptan1	Ctnnb1	Otud7b
Arhgef28	Secisbp2l	Krt18	Ahnak	Acsl5	Capn2
P4ha2	Igkc	Hacd3	Msn	Prdx6	Ehd2
Tspan2	Pfkfb2	Epcam	Krt8	Tmem50b	Tinagl1
Ier3	Ctnnb1	Cebpa	Tead1	Grb14	Rnf181
Timp2	Col6a1	Tspan11	Malat1	Gprc5a	Fdx1
Ahnak	Prdx6	Ppic	Cped1	Scnn1a	Osbpl6
Nt5e	Sh3bgrl3	Dbi	Ier3	Herpud1	Kank2
Sema3b	Calm1	Slc26a9	Ctnna1	H2afj	Klhl24
Aqp5	Nkd1	Me1	Tgm2	Scp2	Ece1
Hist1h2bc	Ctsc	Adgrg1	Gpm6a	Pon3	Kif1b
Gpm6a	Fcer1g	mt-Ta	Ctdspl	Npnt	Popdc3
Epn2	Slc39a8	Pon3	Tspan15	mt-Nd4	Slc44a2
Cav2	H2-D1	Cadm1	Gipc2	Spint2	Epn2
Pkp2	Exosc7	Crb3	Cdh1	Chka	Cfl2
Mprip	Lgals1	Soat1	Dusp7	Iah1	Igfbp6
Tenc1	Itga9	Mtch1	Trp53bp2	Mbip	Cdadc1
Slc4a2	Scp2	Pdzk1ip1	Plscr2	Lyz2	Mbip
Tgm2	mt-Nd4	mt-Nd4	Plod2	Car2	Fktn
Plscr2	Dbi	Cdh1	Cd151	Hp	Dcaf6

## Sheet: ST6 - Maynard squam DEG
FindMarkers comparing 'Late' to 'Early' and 'Baseline' in TH226 - Maynard et al.							Chea3 output from top 50 DEGs
p_val	avg_log2FC	pct.1	pct.2	p_val_adj			Rank	TF	Score	Library	Overlapping_Genes
SAA1	2.55769e-38	2.6839	1	0.019	6.77403e-34		1	GRHL3	5.333	ARCHS4 Coexpression,2;Enrichr Queries,3;GTEx Coexpression,11	ANXA8L1,GPR87,ADH7,CASP14,PLAU,CLCA2,ANXA8,KRT6A,LGALS7B,BCL11B,MIR205HG,FST,TMEM40,KRT5,IGFL1,SERPINB5,FABP5,KRT17,KRT16,GJB5,KRT14,PKP1,DSG3,S100A8,S100A7
SFRP1	2.8527e-38	2.07483	0.769	0	7.55538e-34		2	ZNF750	5.75	ARCHS4 Coexpression,3;Enrichr Queries,4;ReMap ChIP-seq,1;GTEx Coexpression,15	LGALS7B,ANXA8L1,MIR205HG,GPR87,FST,TMEM40,KRT5,IGFL1,ADH7,SERPINB5,CASP14,ANO1,FABP5,KRT17,KRT16,KRT14,GJB5,CLCA2,PKP1,ANXA8,DSG3,S100A8,KRT6A,S100A7
SERPINB5	1.12292e-35	1.71644	0.846	0.01	2.97406e-31		3	TP63	6.2	Literature ChIP-seq,3;ARCHS4 Coexpression,1;Enrichr Queries,2;ReMap ChIP-seq,2;GTEx Coexpression,23	ANXA8L1,GPR87,CASP14,PLAU,CLCA2,HOXA3,ANXA8,KRT6A,LGALS7B,MIR205HG,FST,KRT5,SERPINB5,ANO1,SFRP1,KRT17,KRT16,CD109,KRT14,GJB5,PKP1,SNAI2,DSG3,MDFI,S100A8,S100A7
CASC9	1.83912e-34	0.383	0.692	0	4.8709e-30		4	BNC1	6.333	ARCHS4 Coexpression,5;Enrichr Queries,8;GTEx Coexpression,6	LGALS7B,ANXA8L1,MIR205HG,GPR87,FST,TMEM40,KRT5,SERPINB5,SFRP1,FABP5,KRT17,PLAU,KRT16,CD109,GJB5,KRT14,CLCA2,PKP1,SNAI2,ANXA8,DSG3,MDFI,KRT6A
PKP1	1.83912e-34	1.01988	0.692	0	4.8709e-30		5	SOX15	9	ARCHS4 Coexpression,8;Enrichr Queries,9;GTEx Coexpression,10	ANXA8L1,MIR205HG,GPR87,FST,TMEM40,KRT5,ADH7,SERPINB5,FABP5,KRT17,PLAU,KRT16,GJB5,KRT14,CLCA2,PKP1,SNAI2,ANXA8,DSG3,KRT6A
MIR205HG	2.30967e-34	2.41086	0.923	0.019	6.11715e-30		6	HES2	17.33	ARCHS4 Coexpression,9;Enrichr Queries,25;GTEx Coexpression,18	ANXA8L1,BCL11B,MIR205HG,GPR87,FST,TMEM40,KRT5,SERPINB5,FABP5,KRT17,PLAU,KRT16,GJB5,KRT14,CLCA2,PKP1,ANXA8,DSG3,KRT6A
AIM2	4.78953e-32	1.31533	0.769	0.01	1.26851e-27		7	FOXN1	25	ARCHS4 Coexpression,4;Enrichr Queries,1;GTEx Coexpression,70	ANXA8L1,GPR87,ADH7,CASP14,CLCA2,ANXA8,KRT6A,LGALS7B,BCL11B,FST,TMEM40,KRT5,IGFL1,SERPINB5,ANO1,MMP13,KRT17,KRT16,KRT14,GJB5,PKP1,SNAI2,DSG3,S100A8,S100A7
KRT14	1.13237e-31	7.46617	0.923	0.029	2.99908e-27		8	IRX4	26	ARCHS4 Coexpression,6;Enrichr Queries,55;GTEx Coexpression,17	LGALS7B,ANXA8L1,BCL11B,MIR205HG,GPR87,TMEM40,KRT5,IGFL1,SERPINB5,CASP14,ANO1,SFRP1,KRT17,KRT16,KRT14,GJB5,CLCA2,PKP1,ANXA8,DSG3,MDFI,KRT6A
CLCA2	3.94112e-31	2.53347	0.692	0.005	1.04381e-26		9	OVOL1	28	ARCHS4 Coexpression,10;Enrichr Queries,26;GTEx Coexpression,48	LGALS7B,ANXA8L1,BCL11B,MIR205HG,GPR87,TMEM40,KRT5,SERPINB5,KRT17,PLAU,KRT16,GJB5,KRT14,CLCA2,PKP1,ANXA8,DSG3,S100A8,KRT6A
HOXA3	5.26283e-31	0.321379	0.692	0.005	1.39386e-26		10	DLX3	33.67	ARCHS4 Coexpression,15;Enrichr Queries,10;GTEx Coexpression,76	LGALS7B,ANXA8L1,BCL11B,GPR87,FST,SERPINB5,CASP14,ANO1,KRT16,KRT14,GJB5,PKP1,SNAI2,ANXA8,MDFI
PCDHB2	1.10316e-30	0.301712	0.615	0	2.92172e-26		11	ZNF860	37.5	ARCHS4 Coexpression,71;GTEx Coexpression,4	ANXA8L1,MIR205HG,GPR87,TMEM40,KRT5,ADH7,FABP5,GJB5,CLCA2,ANXA8,DSG3,S100A8,KRT6A
ANXA8	5.6435e-30	0.703536	0.769	0.014	1.49468e-25		12	HOXA1	37.67	ARCHS4 Coexpression,21;Enrichr Queries,51;GTEx Coexpression,41	ANXA8L1,GPR87,FST,TMEM40,ADH7,SERPINB5,SFRP1,FABP5,PLAU,CD109,GJB5,CLCA2,HOXA3,SNAI2,ANXA8,DSG3
KRT5	7.24955e-30	3.87077	0.769	0.014	1.92004e-25		13	EHF	37.75	ARCHS4 Coexpression,14;Enrichr Queries,67;ReMap ChIP-seq,38;GTEx Coexpression,32	ANXA8L1,MIR205HG,GPR87,TMEM40,KRT5,ADH7,SERPINB5,ANO1,FABP5,KRT17,PLAU,KRT16,GJB5,CLCA2,PKP1,ANXA8,DSG3,S100A8,KRT6A
FST	1.84486e-28	2.70651	0.692	0.01	4.88611e-24		14	SOX7	43	ARCHS4 Coexpression,64;Enrichr Queries,53;GTEx Coexpression,12	MIR205HG,GPR87,FST,TMEM40,KRT5,SFRP1,FABP5,PLAU,GJB5,CLCA2,SNAI2,ANXA8,DSG3,MDFI,S100A8,KRT6A
S100A8	1.71335e-27	2.47181	0.769	0.019	4.53781e-23		15	PAX9	48	ARCHS4 Coexpression,18;Enrichr Queries,105;GTEx Coexpression,21	ANXA8L1,BCL11B,GPR87,FST,TMEM40,IGFL1,ADH7,SFRP1,FABP5,GJB5,CLCA2,PKP1,ANXA8,DSG3,S100A8,KRT6A
BCL11B	2.67776e-27	0.560327	0.615	0.005	7.09205e-23		16	IRF6	55.33	ARCHS4 Coexpression,7;Enrichr Queries,143;GTEx Coexpression,16	LGALS7B,ANXA8L1,MIR205HG,GPR87,FST,TMEM40,KRT5,SERPINB5,CASP14,KRT17,KRT16,KRT14,GJB5,CLCA2,PKP1,ANXA8,DSG3,KRT6A
SSPN	5.41956e-27	0.67998	0.769	0.019	1.43537e-22		17	MSGN1	61	ARCHS4 Coexpression,150;Enrichr Queries,24;GTEx Coexpression,9	BCL11B,MIR205HG,GPR87,FST,TMEM40,KRT5,IGFL1,ADH7,HOXD11,FABP5,GJB5,CLCA2,SNAI2,DSG3,S100A8,KRT6A
KRT6A	1.13458e-26	5.80771	0.846	0.033	3.00494e-22		18	HOXA9	62.75	ARCHS4 Coexpression,56;Enrichr Queries,40;ReMap ChIP-seq,34;GTEx Coexpression,121	GPR87,FST,HOXD11,SERPINB5,CASP14,SFRP1,PODNL1,KRT14,SAA1,HOXA3,PKP1,SAA2,SNAI2
LGALS7B	3.51223e-26	1.42259	0.692	0.014	9.30215e-22		19	PRRX1	64.67	ARCHS4 Coexpression,27;Enrichr Queries,14;GTEx Coexpression,153	MFAP5,SFRP1,PLAU,CD109,FST,SSPN,SNAI2
MDFI	3.96478e-26	1.03187	0.692	0.014	1.05007e-21		20	BARX2	66.33	ARCHS4 Coexpression,29;Enrichr Queries,150;GTEx Coexpression,20	LGALS7B,BCL11B,MIR205HG,GPR87,FST,TMEM40,KRT5,IGFL1,ADH7,SFRP1,FABP5,GJB5,CLCA2,PKP1,DSG3
KRT16	1.36901e-25	5.62525	0.846	0.038	3.62583e-21		21	TFAP2C	73.5	Literature ChIP-seq,24;ARCHS4 Coexpression,41;ENCODE ChIP-seq,14;Enrichr Queries,239;ReMap ChIP-seq,101;GTEx Coexpression,22	ANXA8L1,BCL11B,MIR205HG,GPR87,FST,TMEM40,KRT5,HOXD11,SERPINB5,CASP14,SFRP1,KRT17,KRT16,PLAU,KRT14,GJB5,CLCA2,PKP1,SNAI2,ANXA8,S100A8,DGKH
UGT1A6	1.06542e-24	0.654729	0.615	0.01	2.82175e-20		22	SP6	73.67	ARCHS4 Coexpression,75;Enrichr Queries,61;GTEx Coexpression,85	CASP14,ANO1,ANXA8L1,KRT17,PLAU,GPR87,FST,KRT14,GJB5,PKP1,SERPINB5,MDFI
DSG3	2.39115e-24	2.76665	0.692	0.019	6.33297e-20		23	TFAP2A	75.67	Literature ChIP-seq,119;ARCHS4 Coexpression,22;ENCODE ChIP-seq,4;Enrichr Queries,133;ReMap ChIP-seq,138;GTEx Coexpression,38	ANXA8L1,MIR205HG,GPR87,FST,SLC1A3,KRT5,SERPINB5,CASP14,ANO1,SFRP1,KRT17,PLAU,KRT16,KRT14,GJB5,CLCA2,PKP1,SNAI2,ANXA8,S100A8,DGKH,UGT1A6
PLAU	4.18843e-24	1.78259	0.692	0.019	1.10931e-19		24	PITX1	79	ARCHS4 Coexpression,88;Enrichr Queries,146;GTEx Coexpression,3	MIR205HG,GPR87,FST,TMEM40,KRT5,IGFL1,ADH7,SFRP1,FABP5,PLAU,GJB5,CLCA2,SNAI2,DSG3,S100A8,KRT6A
ADH7	1.24498e-23	0.73079	0.538	0.005	3.29734e-19		25	OSR2	80	ARCHS4 Coexpression,79;Enrichr Queries,34;GTEx Coexpression,127	MFAP5,SFRP1,PLAU,FST,SNAI2,HOXD11
SAA2	1.64485e-23	1.69653	0.538	0.005	4.35639e-19		26	HOXA4	80.33	ARCHS4 Coexpression,44;Enrichr Queries,37;GTEx Coexpression,160	SFRP1,PLAU,FST,HOXA3,SSPN,HOXD11
BBOX1-AS1	3.22876e-23	0.539247	0.462	0	8.55138e-19		27	BNC2	81	ARCHS4 Coexpression,38;Enrichr Queries,29;GTEx Coexpression,176	MFAP5,SFRP1,PLAU,FST,SSPN,SLC1A3,SNAI2,HOXD11
HOXD11	3.22876e-23	0.509837	0.462	0	8.55138e-19		28	PRRX2	81.33	ARCHS4 Coexpression,59;Enrichr Queries,54;GTEx Coexpression,131	MFAP5,ANO1,SFRP1,PODNL1,PLAU,CD109,FST,SNAI2
IGFL1	3.22876e-23	3.6688	0.462	0	8.55138e-19		29	HOXC8	83	ARCHS4 Coexpression,103;Enrichr Queries,17;GTEx Coexpression,129	MFAP5,SFRP1,STEAP1B,PLAU,CD109,FST,HOXA3,SNAI2,HOXD11,DGKH
SNAI2	6.53426e-23	2.34425	0.769	0.033	1.7306e-18		30	HOXD9	83	ARCHS4 Coexpression,77;Enrichr Queries,13;GTEx Coexpression,159	ANO1,SFRP1,FST,HOXA3,SNAI2,HOXD11
STEAP1B	1.22174e-22	0.643007	0.692	0.024	3.23578e-18		31	FOXQ1	84.33	ARCHS4 Coexpression,23;Enrichr Queries,156;GTEx Coexpression,74	ANXA8L1,GPR87,FST,SERPINB5,CASP14,ANO1,PLAU,KRT14,GJB5,PKP1,SNAI2,ANXA8,S100A8
FYB	1.50535e-22	1.33797	0.692	0.024	3.98693e-18		32	HOXC6	88.67	ARCHS4 Coexpression,86;Enrichr Queries,65;GTEx Coexpression,115	MFAP5,SFRP1,PODNL1,STEAP1B,PLAU,CD109,FST,HOXA3,SNAI2,HOXD11
CD109	2.28234e-22	1.25138	0.692	0.024	6.04479e-18		33	GRHL2	90.8	Literature ChIP-seq,53;ARCHS4 Coexpression,85;Enrichr Queries,270;ReMap ChIP-seq,6;GTEx Coexpression,40	ANXA8L1,BCL11B,MIR205HG,GPR87,TMEM40,KRT5,IGFL1,SERPINB5,ANO1,CASP14,SFRP1,PLAU,GJB5,CLCA2,SSPN,PKP1,ANXA8,S100A8
GPR87	2.56913e-22	0.981822	0.615	0.014	6.80435e-18		34	HOXC4	91.33	ARCHS4 Coexpression,83;Enrichr Queries,66;GTEx Coexpression,125	PODNL1,STEAP1B,BCL11B,CD109,FST,HOXA3,SNAI2,HOXD11
DGKH	8.16077e-22	0.433649	0.846	0.048	2.16138e-17		35	TWIST2	91.5	ARCHS4 Coexpression,53;GTEx Coexpression,130	MFAP5,STEAP1B,CD109,SNAI2
AKR1C2	1.27477e-21	2.36466	0.923	0.067	3.37623e-17		36	HOXA10	91.67	ARCHS4 Coexpression,40;Enrichr Queries,64;GTEx Coexpression,171	PLAU,FST,SSPN,HOXA3,SNAI2,HOXD11
SLC1A3	3.14989e-21	0.741654	0.846	0.048	8.34248e-17		37	ZBTB7C	94	ARCHS4 Coexpression,31;Enrichr Queries,246;GTEx Coexpression,5	LGALS7B,BCL11B,MIR205HG,GPR87,TMEM40,KRT5,ADH7,SERPINB5,ANO1,SFRP1,FABP5,GJB5,CLCA2,PKP1,DSG3
MFAP5	3.64077e-21	1.76421	0.538	0.01	9.64257e-17		38	HOXD8	94.67	ARCHS4 Coexpression,20;Enrichr Queries,39;GTEx Coexpression,225	SFRP1,PCDHB2,FST,CD109,HOXA3,SSPN,SNAI2,HOXD11
MMP13	8.56869e-21	2.60841	0.615	0.019	2.26942e-16		39	GLI3	99.67	ARCHS4 Coexpression,46;Enrichr Queries,87;GTEx Coexpression,166	SFRP1,CD109,FST,SNAI2,SLC1A3,MDFI
GJB7	1.59917e-20	0.431085	0.538	0.01	4.23539e-16		40	OSR1	101.5	ARCHS4 Coexpression,33;GTEx Coexpression,170	MFAP5,ANO1,HOXA3,SNAI2
TMEM40	2.01509e-20	0.536139	0.615	0.019	5.33696e-16		41	TWIST1	107.5	ARCHS4 Coexpression,36;Enrichr Queries,136;ReMap ChIP-seq,130;GTEx Coexpression,128	MFAP5,SFRP1,STEAP1B,PLAU,CD109,FST,SNAI2,BBOX1-AS1
ANXA8L1	4.65014e-20	1.35905	0.692	0.033	1.23159e-15		42	HOXD10	108.3	ARCHS4 Coexpression,51;Enrichr Queries,19;GTEx Coexpression,255	SFRP1,PLAU,FST,HOXA3,SNAI2,HOXD11
ANO1	5.25828e-20	1.10026	0.462	0.005	1.39265e-15		43	SNAI2	112.3	ARCHS4 Coexpression,25;Enrichr Queries,211;ReMap ChIP-seq,59;GTEx Coexpression,154	MFAP5,SFRP1,STEAP1B,PLAU,CD109,MIR205HG,FST,HOXA3,PKP1,KRT5,SERPINB5
GJB5	9.05143e-20	0.711002	0.462	0.005	2.39727e-15		44	HOXA2	113.5	Literature ChIP-seq,162;ARCHS4 Coexpression,39;Enrichr Queries,43;GTEx Coexpression,210	SFRP1,PLAU,FST,HOXA3,SNAI2,HOXD11
FABP5	1.4359e-19	1.46911	1	0.11	3.80299e-15		45	TBX18	115.3	ARCHS4 Coexpression,28;Enrichr Queries,103;GTEx Coexpression,215	MFAP5,SFRP1,PODNL1,FST,CD109,SNAI2,AKR1C2
CASP14	1.58699e-19	0.437965	0.385	0	4.20316e-15		46	HOXD4	116	ARCHS4 Coexpression,72;Enrichr Queries,38;GTEx Coexpression,238	SFRP1,FST,HOXA3,SNAI2,HOXD11
S100A7	1.58699e-19	2.28724	0.385	0	4.20316e-15		47	ARNTL2	116.7	ARCHS4 Coexpression,11;Enrichr Queries,271;GTEx Coexpression,68	ANXA8L1,GPR87,FST,TMEM40,KRT5,ADH7,SERPINB5,FABP5,KRT17,PLAU,CD109,GJB5,CLCA2,PKP1,ANXA8,DSG3,KRT6A
KRT17	1.73688e-19	4.2361	1	0.11	4.60012e-15		48	IRX6	118	ARCHS4 Coexpression,50;Enrichr Queries,188;GTEx Coexpression,116	CASP14,LGALS7B,SFRP1,BCL11B,FST,KRT14,PKP1,SERPINB5
PODNL1	4.9594e-19	0.782394	0.615	0.024	1.3135e-14		49	RFX8	118.5	ARCHS4 Coexpression,81;GTEx Coexpression,156	STEAP1B,CD109,SNAI2
CLEC2B	5.47341e-19	0.390285	0.615	0.024	1.44963e-14		50	SOX9	119.6	Literature ChIP-seq,19;ARCHS4 Coexpression,237;Enrichr Queries,60;ReMap ChIP-seq,54;GTEx Coexpression,228	FST,SLC1A3,SERPINB5,SFRP1,PLAU,HOXA3,SSPN,SNAI2,PKP1,ANXA8,DSG3,DGKH,KRT6A
LRRN1	6.01719e-19	0.64601	0.538	0.014	1.59365e-14		51	RARG	125.5	Literature ChIP-seq,26;ARCHS4 Coexpression,19;Enrichr Queries,420;GTEx Coexpression,37	MIR205HG,GPR87,FST,TMEM40,KRT5,SERPINB5,KRT17,PLAU,GJB5,KRT14,CLCA2,PKP1,S100A8
LTB4R2	6.01719e-19	0.373258	0.538	0.014	1.59365e-14		52	FOXS1	126.7	ARCHS4 Coexpression,58;Enrichr Queries,199;GTEx Coexpression,123	MFAP5,ANO1,PODNL1,PLAU,FST,SSPN,SNAI2
MARK1	8.11072e-19	0.462693	0.615	0.024	2.14812e-14		53	SALL3	127	ARCHS4 Coexpression,37;Enrichr Queries,111;GTEx Coexpression,233	SFRP1,BCL11B,FABP5,FST,SLC1A3
TM4SF18	8.4011e-19	0.511455	0.538	0.014	2.22503e-14		54	DLX5	134.7	ARCHS4 Coexpression,230;Enrichr Queries,112;GTEx Coexpression,62	CASP14,SFRP1,BCL11B,PCDHB2,GPR87,FST,KRT14,GJB5,PKP1,SNAI2,SERPINB5
CX3CL1	1.95146e-18	0.925643	0.615	0.024	5.16845e-14		55	MEOX2	135	ARCHS4 Coexpression,34;Enrichr Queries,95;GTEx Coexpression,276	MFAP5,SFRP1,FST,SSPN,SNAI2,HOXD11
GALNT14	2.53046e-18	0.357964	0.538	0.014	6.70192e-14		56	HOXA6	137.7	ARCHS4 Coexpression,65;Enrichr Queries,203;GTEx Coexpression,145	PLAU,CD109,HOXA3,HOXD11
HDGFRP3	2.88567e-18	0.677497	0.692	0.038	7.6427e-14		57	HOXA3	138	ARCHS4 Coexpression,30;Enrichr Queries,104;GTEx Coexpression,280	ANO1,SFRP1,PLAU,FST,CD109,SAA1,SSPN,SNAI2,HOXD11
TRPS1	4.80348e-18	0.692108	0.692	0.038	1.2722e-13		58	RARB	138.3	Literature ChIP-seq,69;ARCHS4 Coexpression,66;Enrichr Queries,192;GTEx Coexpression,226	CASP14,SFRP1,FABP5,FST,GPR87,SNAI2,S100A8,DGKH
PRKCQ-AS1	1.36133e-17	0.294779	0.462	0.01	3.60548e-13		59	HOXC12	138.3	ARCHS4 Coexpression,235;Enrichr Queries,71;GTEx Coexpression,109	CASP14,SFRP1,KRT14,GJB5,HOXA3,PKP1,ADH7,HOXD11,SERPINB5
TP63	1.36133e-17	0.785742	0.462	0.01	3.60548e-13		60	NR2E1	141	ARCHS4 Coexpression,116;Enrichr Queries,90;GTEx Coexpression,217	SFRP1,BCL11B,SLC1A3,HOXD11
SERPINE2	1.47003e-17	0.612699	0.615	0.029	3.89338e-13		61	ALX4	142.7	ARCHS4 Coexpression,61;Enrichr Queries,318;GTEx Coexpression,49	ANO1,SFRP1,KRT17,BCL11B,CD109,KRT14,PKP1,SNAI2,HOXD11,MDFI
TNFRSF6B	1.72736e-17	0.698997	0.462	0.01	4.57491e-13		62	HOXB1	144.7	ARCHS4 Coexpression,309;Enrichr Queries,106;GTEx Coexpression,19	BCL11B,MIR205HG,GPR87,FST,TMEM40,KRT5,ADH7,HOXD11,SERPINB5,FABP5,GJB5,CLCA2,HOXA3,DSG3
MIR31HG	2.46548e-17	0.301199	0.462	0.01	6.52983e-13		63	TFAP2B	146	ARCHS4 Coexpression,334;Enrichr Queries,96;GTEx Coexpression,8	BCL11B,MIR205HG,GPR87,FST,TMEM40,KRT5,SERPINB5,ANO1,SFRP1,KRT17,PCDHB2,KRT14,GJB5,CLCA2,PKP1
PITX1	2.80197e-17	1.48807	0.923	0.11	7.42102e-13		64	CDX4	147	ARCHS4 Coexpression,261;Enrichr Queries,114;GTEx Coexpression,66	CASP14,SFRP1,BCL11B,FABP5,GPR87,FST,KRT14,GJB5,PKP1,ADH7,HOXD11,SERPINB5
MME	2.91308e-17	0.914734	0.538	0.019	7.71529e-13		65	FOXD1	148	ARCHS4 Coexpression,182;GTEx Coexpression,114	PODNL1,STEAP1B,CD109,SNAI2
MFAP2	3.5668e-17	0.739447	0.538	0.019	9.44667e-13		66	TBPL2	149.5	ARCHS4 Coexpression,155;GTEx Coexpression,144	CASP14,KRT14,PKP1,TMEM40
P3H2	3.5668e-17	0.73124	0.538	0.019	9.44667e-13		67	GATA3	149.5	Literature ChIP-seq,17;ARCHS4 Coexpression,631;ENCODE ChIP-seq,7;Enrichr Queries,120;ReMap ChIP-seq,63;GTEx Coexpression,59	BCL11B,GPR87,FST,SERPINB5,CASP14,SFRP1,AIM2,PLAU,CD109,KRT14,GJB5,SSPN,PKP1,SNAI2,SAA2,UGT1A6
COL6A2	3.98661e-17	0.55403	0.615	0.029	1.05585e-12		68	KLF5	150	Literature ChIP-seq,63;ARCHS4 Coexpression,13;Enrichr Queries,418;ReMap ChIP-seq,229;GTEx Coexpression,27	ANXA8L1,MIR205HG,GPR87,FST,TMEM40,KRT5,IGFL1,SERPINB5,ANO1,PODNL1,AIM2,KRT17,PLAU,KRT14,GJB5,CLCA2,PKP1,ANXA8,DSG3,KRT6A
GJB2	4.06479e-17	2.65211	0.692	0.048	1.07656e-12		69	HOXB3	152	ARCHS4 Coexpression,100;Enrichr Queries,15;GTEx Coexpression,341	SFRP1,BCL11B,PLAU,FST,HOXA3,SNAI2,HOXD11
STON2	5.0933e-17	3.01822	0.769	0.067	1.34896e-12		70	HOXB5	153	ARCHS4 Coexpression,70;Enrichr Queries,50;GTEx Coexpression,339	SFRP1,PLAU,FST,HOXA3,SNAI2
COL17A1	6.48913e-17	2.97771	0.692	0.048	1.71865e-12		71	POU1F1	153.7	ARCHS4 Coexpression,55;Enrichr Queries,125;GTEx Coexpression,281	MMP13,GJB7,SNAI2,PKP1,ADH7,HOXD11,S100A8
HS3ST3B1	6.52555e-17	0.34612	0.538	0.019	1.72829e-12		72	MAF	156.5	ARCHS4 Coexpression,135;Enrichr Queries,219;ReMap ChIP-seq,192;GTEx Coexpression,80	CASP14,SFRP1,BCL11B,PLAU,GPR87,KRT14,GJB5,PKP1,SNAI2,SERPINB5
CALD1	8.20495e-17	1.23787	0.923	0.11	2.17308e-12		73	FOXI1	157.7	ARCHS4 Coexpression,105;Enrichr Queries,5;GTEx Coexpression,363	FST,ADH7,HOXD11,SERPINB5,CASP14,SFRP1,MMP13,PLAU,KRT14,CLCA2,SNAI2,S100A8,UGT1A6
MMP2	1.52101e-16	0.920768	0.692	0.043	4.02839e-12		74	VAX1	159.7	ARCHS4 Coexpression,96;Enrichr Queries,176;GTEx Coexpression,207	SFRP1,BCL11B,PCDHB2,SLC1A3,HOXD11,MDFI
CDK6	2.06243e-16	1.8554	0.692	0.048	5.46235e-12		75	FOXF1	164	ARCHS4 Coexpression,26;Enrichr Queries,131;GTEx Coexpression,335	SFRP1,PLAU,FST,HOXA3,SNAI2
KRT6B	2.59894e-16	1.00139	0.385	0.005	6.88329e-12		76	IRX1	167.7	ARCHS4 Coexpression,343;Enrichr Queries,68;GTEx Coexpression,92	ANO1,SFRP1,KRT17,BCL11B,CD109,FST,SNAI2,MDFI
BBOX1	2.96424e-16	0.562447	0.385	0.005	7.85079e-12		77	HOXB6	171.3	ARCHS4 Coexpression,92;Enrichr Queries,46;GTEx Coexpression,376	SFRP1,PLAU,FST,HOXA3,SNAI2,HOXD11
FLRT2	3.90011e-16	0.518679	0.615	0.033	1.03294e-11		78	FOXC1	172	ARCHS4 Coexpression,45;Enrichr Queries,267;GTEx Coexpression,204	ANO1,SFRP1,FST,HOXA3,SNAI2,HOXD11
HTRA3	6.16054e-16	1.15069	0.538	0.024	1.63162e-11		79	FOSL1	174.4	ARCHS4 Coexpression,203;ENCODE ChIP-seq,12;Enrichr Queries,422;ReMap ChIP-seq,67;GTEx Coexpression,168	STEAP1B,PLAU,CD109,FST,GPR87,BBOX1-AS1,KRT5
LPAR6	7.37638e-16	0.423574	0.308	0	1.95363e-11		80	HOXD3	175	ARCHS4 Coexpression,68;Enrichr Queries,216;GTEx Coexpression,241	SFRP1,HOXA3,HOXD11
THSD1	7.37638e-16	0.762213	0.308	0	1.95363e-11		81	PRDM6	177	ARCHS4 Coexpression,124;Enrichr Queries,108;GTEx Coexpression,299	ANO1,SFRP1,BCL11B,FST,SNAI2,HOXD11
SLCO1B3	1.27695e-15	0.50666	0.462	0.014	3.382e-11		82	BCL11A	178.2	ARCHS4 Coexpression,214;ENCODE ChIP-seq,22;Enrichr Queries,407;ReMap ChIP-seq,223;GTEx Coexpression,25	BCL11B,MIR205HG,GPR87,KRT5,SERPINB5,CASP14,SFRP1,AIM2,KRT14,GJB5,SAA1,PKP1,SAA2
GJB3	1.29316e-15	1.03012	0.538	0.024	3.42494e-11		83	POU3F1	179.3	Literature ChIP-seq,115;ARCHS4 Coexpression,355;Enrichr Queries,186;GTEx Coexpression,61	CASP14,SFRP1,BCL11B,PLAU,GPR87,FST,KRT14,GJB5,PKP1,SERPINB5
SLC38A5	1.61847e-15	2.79094	0.692	0.057	4.28652e-11		84	MEIS1	179.6	Literature ChIP-seq,71;ARCHS4 Coexpression,216;Enrichr Queries,326;ReMap ChIP-seq,103;GTEx Coexpression,182	SFRP1,PODNL1,CD109,HOXA3,SNAI2,TMEM40,SLC1A3,DSG3,HOXD11
DSE	2.08766e-15	1.00844	0.615	0.038	5.52917e-11		85	HOXD13	179.8	Literature ChIP-seq,49;ARCHS4 Coexpression,308;Enrichr Queries,11;GTEx Coexpression,351	SFRP1,BCL11B,FST,HOXA3,SSPN,SNAI2,HOXD11
HCAR2	2.40094e-15	0.726687	0.462	0.014	6.35889e-11		86	HOXA5	181.7	ARCHS4 Coexpression,63;Enrichr Queries,283;GTEx Coexpression,199	SFRP1,HOXA3,SNAI2,HOXD11
TPBG	2.47329e-15	1.9389	0.692	0.057	6.55051e-11		87	PAX1	185	ARCHS4 Coexpression,69;Enrichr Queries,166;GTEx Coexpression,320	SFRP1,CD109,SNAI2,PKP1,HOXD11
IGFBP6	2.6658e-15	0.631417	0.462	0.014	7.06038e-11		88	SCX	185	ARCHS4 Coexpression,185	MDFI
IL20RB	5.82036e-15	1.81154	0.769	0.081	1.54152e-10		89	NKX12	185	ARCHS4 Coexpression,363;GTEx Coexpression,7	BCL11B,FABP5,GPR87,GJB5,CLCA2,TMEM40,KRT5,DSG3,ADH7,SERPINB5,KRT6A
GJA1	1.62406e-14	1.19722	0.538	0.029	4.30131e-10		90	FOXF2	188.7	ARCHS4 Coexpression,87;Enrichr Queries,122;GTEx Coexpression,357	SFRP1,PLAU,FST,HOXA3,SNAI2,HOXD11
FBLN1	2.65851e-14	1.59171	0.846	0.096	7.04105e-10		91	PPARG	190.4	Literature ChIP-seq,18;ARCHS4 Coexpression,142;Enrichr Queries,437;ReMap ChIP-seq,150;GTEx Coexpression,205	PLAU,FST,SSPN,SAA1,AKR1C2,ANXA8,S100A8
WTAPP1	3.71142e-14	0.539369	0.692	0.062	9.82968e-10		92	HOXB7	191.6	Literature ChIP-seq,81;ARCHS4 Coexpression,162;Enrichr Queries,62;ReMap ChIP-seq,293;GTEx Coexpression,360	SFRP1,BCL11B,PCDHB2,PLAU,FST,HOXA3,SAA1,SNAI2
ADGRE1	4.15018e-14	0.764745	0.385	0.01	1.09917e-09		93	HOXA11	192.7	ARCHS4 Coexpression,357;Enrichr Queries,23;GTEx Coexpression,198	SFRP1,PLAU,FST,HOXA3,SNAI2,HOXD11
ALDH3B2	4.15018e-14	0.754124	0.385	0.01	1.09917e-09		94	MSANTD3	194	ARCHS4 Coexpression,156;GTEx Coexpression,232	STEAP1B,TMEM40
FJX1	4.64601e-14	1.19037	0.385	0.01	1.2305e-09		95	FOXE1	194.3	ARCHS4 Coexpression,24;Enrichr Queries,49;GTEx Coexpression,510	SFRP1,ANXA8L1,BCL11B,FST,GJB5,PKP1,ANXA8,DSG3,ADH7,HOXD11
S1PR5	5.19998e-14	0.658838	0.385	0.01	1.37722e-09		96	GLIS1	195.3	ARCHS4 Coexpression,159;Enrichr Queries,315;GTEx Coexpression,112	SFRP1,PODNL1,STEAP1B,CD109,FST,SNAI2
ZFPM2-AS1	5.19998e-14	0.53148	0.385	0.01	1.37722e-09		97	SOX2	195.6	Literature ChIP-seq,5;ARCHS4 Coexpression,374;Enrichr Queries,231;ReMap ChIP-seq,175;GTEx Coexpression,193	MIR205HG,FST,GPR87,SLC1A3,SERPINB5,ANO1,SFRP1,FABP5,KRT17,PLAU,CD109,SSPN,SNAI2,KRT6A,DGKH,UGT1A6
KLK10	5.81877e-14	0.881055	0.385	0.01	1.5411e-09		98	ELK3	198.8	Literature ChIP-seq,96;ARCHS4 Coexpression,93;Enrichr Queries,406;GTEx Coexpression,200	ANO1,PLAU,CD109,SNAI2,TMEM40,MDFI
RIN1	5.81877e-14	0.560648	0.385	0.01	1.5411e-09		99	MITF	199	Literature ChIP-seq,114;ARCHS4 Coexpression,168;Enrichr Queries,210;ReMap ChIP-seq,158;GTEx Coexpression,345	ANO1,SFRP1,PLAU,CD109,SSPN,HOXA3,SNAI2,PKP1,SLC1A3,DGKH
FGFBP1	6.5098e-14	0.53783	0.385	0.01	1.72412e-09		100	DUX4	201	ARCHS4 Coexpression,273;ReMap ChIP-seq,129	BBOX1-AS1,DSG3
KCNMB2-AS1	6.5098e-14	0.321443	0.385	0.01	1.72412e-09		101	HOXC11	201.5	ARCHS4 Coexpression,358;Enrichr Queries,36;ReMap ChIP-seq,294;GTEx Coexpression,118	CASP14,SFRP1,STEAP1B,BCL11B,CD109,FST,HOXA3,SNAI2,HOXD11
LYPD5	6.5098e-14	0.375155	0.385	0.01	1.72412e-09		102	HMGA2	203	ARCHS4 Coexpression,212;Enrichr Queries,262;GTEx Coexpression,135	SFRP1,STEAP1B,PLAU,CD109,FST,SNAI2
PI3	6.5098e-14	1.93414	0.385	0.01	1.72412e-09		103	GRHL1	204.7	ARCHS4 Coexpression,12;Enrichr Queries,588;GTEx Coexpression,14	LGALS7B,ANXA8L1,MIR205HG,GPR87,TMEM40,KRT5,SERPINB5,CASP14,FABP5,KRT16,GJB5,CLCA2,PKP1,DSG3,S100A8,KRT6A,S100A7
CCDC3	7.28135e-14	0.627571	0.385	0.01	1.92847e-09		104	KLF4	205	Literature ChIP-seq,9;ARCHS4 Coexpression,283;Enrichr Queries,619;ReMap ChIP-seq,37;GTEx Coexpression,77	GPR87,TMEM40,SLC1A3,SERPINB5,CASP14,SFRP1,KRT17,FABP5,PLAU,KRT16,CD109,KRT14,GJB5,PKP1,S100A8
CA9	7.51862e-14	1.07031	0.538	0.033	1.99131e-09		105	KDM5B	208	Literature ChIP-seq,105;ARCHS4 Coexpression,369;ENCODE ChIP-seq,61;ReMap ChIP-seq,117;GTEx Coexpression,388	FABP5,PCDHB2,BCL11B,PLAU,HOXA3,HOXD11,DGKH
PLEKHG3	7.79423e-14	0.718387	0.462	0.019	2.0643e-09		106	SP8	214.3	ARCHS4 Coexpression,386;Enrichr Queries,206;GTEx Coexpression,51	CASP14,SFRP1,BCL11B,PCDHB2,GPR87,FST,KRT14,GJB5,PKP1,SERPINB5
PYCARD	8.4665e-14	0.510434	0.769	0.081	2.24235e-09		107	FOXG1	214.7	ARCHS4 Coexpression,167;Enrichr Queries,115;GTEx Coexpression,362	SFRP1,BCL11B,FST,SLC1A3
LY6D	8.56313e-14	0.87534	0.462	0.019	2.26794e-09		108	NPAS2	217.3	ARCHS4 Coexpression,382;Enrichr Queries,205;GTEx Coexpression,65	SFRP1,FABP5,PLAU,GPR87,FST,GJB5,CLCA2,TMEM40,DSG3,ADH7,HOXD11
NRG1	9.10382e-14	0.394663	0.385	0.01	2.41115e-09		109	MYC	220	Literature ChIP-seq,28;ARCHS4 Coexpression,380;ENCODE ChIP-seq,62;Enrichr Queries,547;ReMap ChIP-seq,205;GTEx Coexpression,98	FST,SERPINB5,CASP14,AIM2,PCDHB2,PLAU,KRT14,GJB5,SAA1,SSPN,PKP1,SAA2,ANXA8,S100A8,MDFI
FOXF2	9.40646e-14	0.43589	0.462	0.019	2.4913e-09		110	FOXD3	220.3	ARCHS4 Coexpression,303;Enrichr Queries,183;GTEx Coexpression,175	MFAP5,SFRP1,PODNL1,BCL11B,FST
EGLN3	1.58162e-13	1.75026	1	0.22	4.18893e-09		111	HOXD12	221.7	ARCHS4 Coexpression,121;Enrichr Queries,169;GTEx Coexpression,375	HOXA3,HOXD11,ADH7
AKR1C1	1.75341e-13	0.904898	0.615	0.048	4.6439e-09		112	SOX21	222.7	ARCHS4 Coexpression,371;Enrichr Queries,240;GTEx Coexpression,57	CASP14,SFRP1,BCL11B,GPR87,FST,KRT14,GJB5,PKP1,SLC1A3,SERPINB5
NNMT	1.7771e-13	1.30487	0.846	0.11	4.70666e-09		113	HAND1	223.7	ARCHS4 Coexpression,42;Enrichr Queries,319;GTEx Coexpression,310	SFRP1,FABP5,SNAI2,HOXD11,MDFI
GJB6	2.32429e-13	1.67894	0.615	0.053	6.15587e-09		114	DLX2	224	ARCHS4 Coexpression,181;Enrichr Queries,145;GTEx Coexpression,346	SFRP1,STEAP1B,BCL11B,PCDHB2,FST,SNAI2
AMIGO2	2.60411e-13	1.36593	0.769	0.096	6.89699e-09		115	FOS	224.6	ARCHS4 Coexpression,388;ENCODE ChIP-seq,6;Enrichr Queries,442;ReMap ChIP-seq,3;GTEx Coexpression,284	MIR205HG,GPR87,SLC1A3,KRT5,PODNL1,PLAU,CD109,KRT14,PKP1,SNAI2,S100A8,KRT6A,UGT1A6
PRSS23	4.26232e-13	3.00377	0.846	0.134	1.12888e-08		116	ALX1	224.7	ARCHS4 Coexpression,441;Enrichr Queries,94;GTEx Coexpression,139	SFRP1,STEAP1B,CD109,FST,SNAI2,HOXD11
AK4	5.1573e-13	0.66233	0.538	0.038	1.36591e-08		117	ZSCAN9	225	ARCHS4 Coexpression,141;GTEx Coexpression,309	BCL11B,PCDHB2
PENK	8.60069e-13	0.908611	0.308	0.005	2.27789e-08		118	SP7	225	ARCHS4 Coexpression,35;Enrichr Queries,377;GTEx Coexpression,263	MMP13,FST,SNAI2,MDFI
TENM2	8.79375e-13	0.935229	0.462	0.024	2.32903e-08		119	NFIB	226.3	Literature ChIP-seq,145;ARCHS4 Coexpression,215;Enrichr Queries,376;GTEx Coexpression,169	ANO1,SFRP1,BCL11B,SLC1A3
ZNF702P	9.07215e-13	0.401851	0.692	0.067	2.40276e-08		120	HOXB4	227	Literature ChIP-seq,133;ARCHS4 Coexpression,275;Enrichr Queries,152;GTEx Coexpression,348	SFRP1,FST,HOXA3,SNAI2
LOC100288181	9.75574e-13	0.314	0.308	0.005	2.58381e-08		121	ZEB1	228	ARCHS4 Coexpression,98;ENCODE ChIP-seq,109;Enrichr Queries,576;ReMap ChIP-seq,166;GTEx Coexpression,191	PLAU,SSPN,SNAI2,SLC1A3
MARVELD1	1.24002e-12	0.511468	0.462	0.024	3.2842e-08		122	HOXA13	228.3	ARCHS4 Coexpression,315;Enrichr Queries,92;GTEx Coexpression,278	PLAU,HOXA3,SNAI2,HOXD11
MARCKS	1.52818e-12	1.78117	1	0.211	4.04739e-08		123	ZBED2	228.7	ARCHS4 Coexpression,16;Enrichr Queries,6;GTEx Coexpression,664	ANXA8L1,GPR87,KRT5,SERPINB5,AIM2,KRT17,PLAU,KRT14,GJB5,CLCA2,ANXA8,DSG3,S100A8,KRT6A
EFNA5	1.668e-12	0.752418	0.692	0.067	4.4177e-08		124	DLX4	230	Literature ChIP-seq,164;ARCHS4 Coexpression,484;Enrichr Queries,189;GTEx Coexpression,83	CASP14,SFRP1,BCL11B,GPR87,KRT14,GJB5,PKP1,HOXD11,SERPINB5
SLC16A3	1.75142e-12	1.49721	0.846	0.129	4.63862e-08		125	TP73	233	ARCHS4 Coexpression,295;Enrichr Queries,369;GTEx Coexpression,35	BCL11B,PLAU,MIR205HG,GPR87,KRT14,GJB5,CLCA2,PKP1,KRT5,ADH7,SERPINB5
ARTN	2.07775e-12	0.339994	0.385	0.014	5.50293e-08		126	SHOX2	233.7	ARCHS4 Coexpression,398;Enrichr Queries,190;GTEx Coexpression,113	MFAP5,SFRP1,PODNL1,FST,CD109,SNAI2
FAT2	2.07775e-12	0.563189	0.385	0.014	5.50293e-08		127	AHR	236.4	Literature ChIP-seq,27;ARCHS4 Coexpression,330;Enrichr Queries,605;ReMap ChIP-seq,33;GTEx Coexpression,187	MFAP5,ANO1,PODNL1,PLAU,GPR87,CD109,PKP1,SLC1A3,KRT5,KRT6A
PTGS1	2.07775e-12	1.13332	0.385	0.014	5.50293e-08		128	HOXB2	237.3	ARCHS4 Coexpression,338;Enrichr Queries,22;GTEx Coexpression,352	SFRP1,PLAU,FST,HOXA3,SLC1A3,SNAI2
PALMD	3.04541e-12	0.489796	0.538	0.038	8.06577e-08		129	GLI1	238.3	Literature ChIP-seq,160;ARCHS4 Coexpression,582;Enrichr Queries,47;GTEx Coexpression,164	MFAP5,SFRP1,PODNL1,BCL11B,PLAU,FST,SNAI2
B3GNT4	3.28032e-12	0.431808	0.231	0	8.68793e-08		130	MEIS2	240.3	ARCHS4 Coexpression,397;Enrichr Queries,56;ReMap ChIP-seq,285;GTEx Coexpression,223	SFRP1,BCL11B,FST,SLC1A3,SNAI2,DGKH
DKFZp434J0226	3.28032e-12	0.268935	0.231	0	8.68793e-08		131	TFCP2L1	241.7	ARCHS4 Coexpression,17;Enrichr Queries,248;GTEx Coexpression,460	ANO1,SFRP1,ANXA8L1,KRT17,GPR87,GJB5,CLCA2,SLC1A3,ANXA8,KRT5,DSG3,SERPINB5
PADI3	3.28032e-12	0.288228	0.231	0	8.68793e-08		132	ASCL2	245.3	ARCHS4 Coexpression,502;Enrichr Queries,159;GTEx Coexpression,75	CASP14,SFRP1,BCL11B,FST,KRT14,GJB5,PKP1,SERPINB5,S100A8
PCDHB17P	3.28032e-12	0.274233	0.231	0	8.68793e-08		133	EMX2	245.7	ARCHS4 Coexpression,429;Enrichr Queries,141;GTEx Coexpression,167	SFRP1,BCL11B,FST,SLC1A3,HOXD11
RNF152	3.28032e-12	0.493447	0.231	0	8.68793e-08		134	NR2E3	246	ARCHS4 Coexpression,128;Enrichr Queries,364	BCL11B,DSG3,ADH7
TPRXL	3.28032e-12	0.286566	0.231	0	8.68793e-08		135	PGR	247.5	ARCHS4 Coexpression,180;Enrichr Queries,542;ReMap ChIP-seq,110;GTEx Coexpression,158	ANO1,SFRP1,PKP1,KRT5,HOXD11
UCN2	3.28032e-12	0.288018	0.231	0	8.68793e-08		136	RUNX1	248.8	Literature ChIP-seq,104;ARCHS4 Coexpression,297;Enrichr Queries,363;ReMap ChIP-seq,124;GTEx Coexpression,356	AIM2,PLAU,FST,HOXA3
TSPAN5	3.37496e-12	1.09453	0.692	0.086	8.93859e-08		137	BHLHE40	250.3	ARCHS4 Coexpression,700;ENCODE ChIP-seq,65;ReMap ChIP-seq,203;GTEx Coexpression,33	FABP5,MIR205HG,GPR87,CD109,GJB5,CLCA2,TMEM40,KRT5,DSG3,MDFI
MAF	5.62626e-12	0.808906	0.538	0.043	1.49011e-07		138	DBX2	250.7	ARCHS4 Coexpression,113;Enrichr Queries,415;GTEx Coexpression,224	SFRP1,SLC1A3
PGF	6.08889e-12	0.683899	0.385	0.014	1.61264e-07		139	FOXP2	250.8	Literature ChIP-seq,78;ARCHS4 Coexpression,572;ENCODE ChIP-seq,113;Enrichr Queries,390;ReMap ChIP-seq,172;GTEx Coexpression,180	SFRP1,BCL11B,HOXA3,PKP1,SNAI2,HOXD11
JAG2	7.16252e-12	1.12401	0.615	0.062	1.89699e-07		140	TCF12	252.4	ARCHS4 Coexpression,74;ENCODE ChIP-seq,11;Enrichr Queries,929;ReMap ChIP-seq,58;GTEx Coexpression,190	PCDHB2,PLAU,CD109,FST,HOXA3,SSPN,TMEM40,SNAI2,SLC1A3,HOXD11
DAB2	8.42279e-12	0.344757	0.462	0.029	2.23078e-07		141	SALL1	255.3	Literature ChIP-seq,158;ARCHS4 Coexpression,97;Enrichr Queries,235;GTEx Coexpression,531	SFRP1,FST,SLC1A3
FBXO32	1.13872e-11	1.73656	0.923	0.211	3.0159e-07		142	CDX2	256.6	Literature ChIP-seq,22;ARCHS4 Coexpression,733;Enrichr Queries,35;ReMap ChIP-seq,23;GTEx Coexpression,470	FABP5,BCL11B,FST,HOXA3,SSPN,SNAI2,BBOX1-AS1,HOXD11,UGT1A6
PLEKHF1	1.70875e-11	1.20371	0.769	0.115	4.52562e-07		143	RAX	257	ARCHS4 Coexpression,157;Enrichr Queries,298;GTEx Coexpression,316	SFRP1,GJB7,HOXD11
CA12	1.97016e-11	1.88255	0.538	0.048	5.21796e-07		144	EBF1	260.4	ARCHS4 Coexpression,457;ENCODE ChIP-seq,76;Enrichr Queries,348;ReMap ChIP-seq,218;GTEx Coexpression,203	MFAP5,SFRP1,FABP5,FST,SAA2
SOX15	1.99704e-11	0.713369	0.462	0.029	5.28917e-07		145	ZBTB14	261	ARCHS4 Coexpression,48;GTEx Coexpression,474	BCL11B,TMEM40
MAN1A1	2.00902e-11	0.445592	0.615	0.062	5.32088e-07		146	EVX1	262.7	ARCHS4 Coexpression,431;Enrichr Queries,161;GTEx Coexpression,196	FST,HOXA3,HOXD11
SLC36A1	3.05262e-11	0.250877	0.615	0.062	8.08486e-07		147	IRX2	263.3	ARCHS4 Coexpression,710;Enrichr Queries,41;GTEx Coexpression,39	BCL11B,MIR205HG,GPR87,FST,SERPINB5,CASP14,ANO1,SFRP1,KRT17,KRT14,GJB5,PKP1,SNAI2
CCL2	3.33418e-11	1.31209	0.538	0.048	8.83058e-07		148	GSX2	264.3	ARCHS4 Coexpression,73;Enrichr Queries,481;GTEx Coexpression,239	PCDHB2,SLC1A3,HOXD11
S100A9	3.61263e-11	3.85319	0.846	0.177	9.56804e-07		149	DMRTA2	265.7	ARCHS4 Coexpression,627;Enrichr Queries,99;GTEx Coexpression,71	SFRP1,FABP5,BCL11B,FST,CLCA2,TMEM40,DSG3,ADH7,HOXD11,S100A8,KRT6A
LYPD3	3.67959e-11	1.73608	0.769	0.129	9.74539e-07		150	TCF7L1	270	ARCHS4 Coexpression,356;Enrichr Queries,253;GTEx Coexpression,201	ANO1,SFRP1,FST,SNAI2
DIO2	4.39246e-11	1.87329	0.385	0.019	1.16334e-06		151	TET3	270.7	ARCHS4 Coexpression,449;ReMap ChIP-seq,296;GTEx Coexpression,67	CASP14,BCL11B,GPR87,KRT14,GJB5,PKP1,SERPINB5
KYNU	4.39246e-11	1.47187	0.385	0.019	1.16334e-06		152	RORA	275.7	ARCHS4 Coexpression,166;Enrichr Queries,579;GTEx Coexpression,82	CASP14,BCL11B,GPR87,KRT14,GJB5,PKP1,SERPINB5
PRDM1	4.79917e-11	0.771416	0.692	0.086	1.27106e-06		153	RUNX2	277.2	Literature ChIP-seq,59;ARCHS4 Coexpression,956;Enrichr Queries,242;ReMap ChIP-seq,12;GTEx Coexpression,117	STEAP1B,GPR87,FST,BBOX1-AS1,HOXD11,CASP14,PODNL1,PLAU,CD109,HOXA3,SNAI2,SAA2,MDFI
TMEM55A	5.71056e-11	0.353303	0.385	0.019	1.51244e-06		154	HES1	279.3	ARCHS4 Coexpression,247;Enrichr Queries,543;ReMap ChIP-seq,291;GTEx Coexpression,36	CASP14,FABP5,PLAU,MIR205HG,GPR87,KRT14,GJB5,PKP1,KRT5,SERPINB5
GLI3	6.23053e-11	0.651229	0.385	0.019	1.65016e-06		155	EGR3	279.7	ARCHS4 Coexpression,483;Enrichr Queries,269;GTEx Coexpression,87	CASP14,BCL11B,PLAU,FST,KRT14,GJB5,PKP1,SERPINB5
SERPINE1	6.3831e-11	1.05242	0.538	0.048	1.69056e-06		156	ASCL3	280	ARCHS4 Coexpression,253;Enrichr Queries,266;GTEx Coexpression,321	SFRP1,MMP13,ADH7,S100A8
DLK2	6.79672e-11	0.956177	0.385	0.019	1.80011e-06		157	IRX5	281.7	ARCHS4 Coexpression,655;Enrichr Queries,144;GTEx Coexpression,46	BCL11B,MIR205HG,GPR87,FST,KRT5,SERPINB5,CASP14,SFRP1,KRT14,GJB5,PKP1,SNAI2
ZNF662	6.80798e-11	0.736732	0.538	0.048	1.80309e-06		158	MYOG	283.5	ARCHS4 Coexpression,107;ENCODE ChIP-seq,39;Enrichr Queries,256;GTEx Coexpression,732	MFAP5,FST,CD109,HOXA3,SSPN,PKP1,SNAI2,S100A8,DGKH
TRIM29	7.10716e-11	1.97813	0.923	0.206	1.88233e-06		159	TEAD4	285	Literature ChIP-seq,47;ARCHS4 Coexpression,592;ENCODE ChIP-seq,29;Enrichr Queries,383;ReMap ChIP-seq,156;GTEx Coexpression,503	ANO1,PLAU,FST,GPR87,CLCA2,SLC1A3,SNAI2,DGKH
PKP3	7.15696e-11	1.15501	0.846	0.172	1.89552e-06		160	PRDM1	287.4	ARCHS4 Coexpression,943;ENCODE ChIP-seq,34;Enrichr Queries,370;ReMap ChIP-seq,46;GTEx Coexpression,44	GPR87,FST,TMEM40,IGFL1,ADH7,SERPINB5,FABP5,PLAU,CLCA2,SSPN,SNAI2,DSG3,S100A8,KRT6A
PLEK2	8.23608e-11	0.813706	0.462	0.033	2.18133e-06		161	THRB	289	ARCHS4 Coexpression,232;Enrichr Queries,332;GTEx Coexpression,303	SFRP1,SSPN,SLC1A3,TMEM40
CDH11	9.30141e-11	0.85997	0.538	0.053	2.46348e-06		162	ETV1	289.3	ARCHS4 Coexpression,134;Enrichr Queries,428;ReMap ChIP-seq,184;GTEx Coexpression,411	SFRP1,HOXA3,SLC1A3
TRIM47	9.58484e-11	1.00228	0.769	0.124	2.53854e-06		163	ZNF229	290	ARCHS4 Coexpression,118;Enrichr Queries,462	SFRP1,PCDHB2
BDKRB1	9.69095e-11	0.740251	0.308	0.01	2.56665e-06		164	PURA	292	ARCHS4 Coexpression,251;GTEx Coexpression,333	SSPN,DGKH
TMEM52B	9.69095e-11	0.343845	0.308	0.01	2.56665e-06		165	ISL2	293.7	ARCHS4 Coexpression,194;Enrichr Queries,310;GTEx Coexpression,377	AIM2,BCL11B,HOXD11
CLEC7A	1.12083e-10	0.606248	0.538	0.053	2.96853e-06		166	HEY2	297	ARCHS4 Coexpression,590;Enrichr Queries,59;GTEx Coexpression,242	ANO1,SFRP1,FST,SSPN,SLC1A3,SNAI2
PRKCQ	1.19466e-10	0.383564	0.308	0.01	3.16405e-06		167	SOX4	297.3	ARCHS4 Coexpression,62;Enrichr Queries,600;GTEx Coexpression,230	SFRP1,BCL11B,PCDHB2,PLAU
NGFR	1.32593e-10	0.456188	0.308	0.01	3.51173e-06		168	LMX1B	298	ARCHS4 Coexpression,498;Enrichr Queries,336;GTEx Coexpression,60	CASP14,ANO1,SFRP1,KRT17,BCL11B,KRT14,PKP1,SERPINB5
PCDHB13	1.32593e-10	0.253445	0.308	0.01	3.51173e-06		169	ATF3	298	Literature ChIP-seq,10;ARCHS4 Coexpression,1015;ENCODE ChIP-seq,97;Enrichr Queries,287;ReMap ChIP-seq,118;GTEx Coexpression,261	FST,TMEM40,SLC1A3,MFAP5,ANO1,FABP5,KRT17,PLAU,KRT16,CD109,HOXA3,PKP1,SNAI2,S100A8
MT1E	1.43531e-10	0.888504	0.769	0.134	3.80143e-06		170	ETV4	298.5	ARCHS4 Coexpression,400;Enrichr Queries,263;ReMap ChIP-seq,224;GTEx Coexpression,307	SFRP1,PLAU,CD109,FST
UCK2	1.43777e-10	0.611387	0.615	0.072	3.80793e-06		171	HELT	298.7	ARCHS4 Coexpression,323;Enrichr Queries,482;GTEx Coexpression,91	CASP14,BCL11B,PCDHB2,GPR87,KRT14,GJB5,PKP1,SERPINB5
TSKU	1.48956e-10	0.586587	0.692	0.096	3.94511e-06		172	ZIC3	302	Literature ChIP-seq,68;ARCHS4 Coexpression,284;Enrichr Queries,132;GTEx Coexpression,724	SFRP1,BCL11B,FST,CD109,SNAI2
VWA5A	1.81863e-10	0.586378	0.462	0.033	4.81665e-06		173	SRY	302.3	Literature ChIP-seq,13;ARCHS4 Coexpression,642;Enrichr Queries,512;GTEx Coexpression,42	CASP14,CD109,GPR87,KRT14,GJB5,PKP1,SNAI2,SERPINB5
COL4A5	1.95204e-10	0.524402	0.538	0.053	5.16997e-06		174	PCGF2	303	ARCHS4 Coexpression,585;ReMap ChIP-seq,21	BCL11B,HOXA3,PKP1,SLC1A3,HOXD11
SLC7A11	2.46228e-10	1.62377	0.846	0.191	6.52134e-06		175	HOXB9	303.3	ARCHS4 Coexpression,337;Enrichr Queries,116;GTEx Coexpression,457	PLAU,FST,HOXA3,SNAI2,HOXD11
VSNL1	2.7672e-10	1.26545	0.462	0.038	7.32894e-06		176	IRX3	304	ARCHS4 Coexpression,696;Enrichr Queries,153;GTEx Coexpression,63	CASP14,SFRP1,BCL11B,MIR205HG,GPR87,FST,KRT14,GJB5,PKP1,SNAI2,SERPINB5
COL5A1	3.58624e-10	0.56785	0.538	0.053	9.49816e-06		177	PAX2	304	ARCHS4 Coexpression,106;Enrichr Queries,194;GTEx Coexpression,612	SFRP1,BCL11B,HOXA3,HOXD11
HES2	4.45047e-10	0.388252	0.462	0.038	1.17871e-05		178	ISL1	304.7	ARCHS4 Coexpression,644;Enrichr Queries,113;GTEx Coexpression,157	SFRP1,BCL11B,FST,SNAI2,HOXD11
DST	5.16278e-10	3.42201	0.769	0.148	1.36736e-05		179	OVOL2	306	ARCHS4 Coexpression,288;Enrichr Queries,536;ReMap ChIP-seq,295;GTEx Coexpression,105	BCL11B,PLAU,MIR205HG,GPR87,GJB5,PKP1,SERPINB5
SKP2	5.82931e-10	0.647738	0.846	0.167	1.54389e-05		180	ESR1	306.3	Literature ChIP-seq,35;ARCHS4 Coexpression,199;ENCODE ChIP-seq,17;Enrichr Queries,1292;ReMap ChIP-seq,143;GTEx Coexpression,152	ANO1,SFRP1,SSPN,SAA1,PKP1,SAA2,KRT5,HOXD11
ANKH	6.14149e-10	0.917755	0.769	0.139	1.62657e-05		181	GFI1B	306.4	Literature ChIP-seq,131;ARCHS4 Coexpression,133;Enrichr Queries,470;ReMap ChIP-seq,235;GTEx Coexpression,563	TMEM40,S100A8
ZNF234	6.56498e-10	0.364237	0.615	0.072	1.73874e-05		182	ZNF503	309	ARCHS4 Coexpression,95;Enrichr Queries,553;GTEx Coexpression,279	HOXA3,SNAI2,HOXD11
FAM212A	7.5148e-10	0.842125	0.385	0.024	1.99029e-05		183	HAND2	311	ARCHS4 Coexpression,529;Enrichr Queries,107;GTEx Coexpression,297	SFRP1,FST,HOXA3,SNAI2
SIRPA	7.5148e-10	0.371831	0.385	0.024	1.99029e-05		184	HOXC9	311.3	Literature ChIP-seq,130;ARCHS4 Coexpression,277;Enrichr Queries,18;GTEx Coexpression,820	SFRP1,PLAU,FST,HOXA3,SNAI2,HOXD11
COL7A1	8.12494e-10	0.872931	0.385	0.024	2.15189e-05		185	MNX1	311.8	Literature ChIP-seq,20;ARCHS4 Coexpression,290;Enrichr Queries,312;GTEx Coexpression,625	AIM2,MMP13,BCL11B,KRT16,FST,TMEM40,PKP1,HOXD11
SLC2A9	8.78331e-10	0.533592	0.385	0.024	2.32626e-05		186	ELF1	312.4	Literature ChIP-seq,84;ARCHS4 Coexpression,547;ENCODE ChIP-seq,67;ReMap ChIP-seq,220;GTEx Coexpression,644	PCDHB2,KRT17,PKP1
GRIN2A	9.28975e-10	0.470016	0.462	0.038	2.46039e-05		187	HIF1A	313.8	Literature ChIP-seq,148;ARCHS4 Coexpression,67;Enrichr Queries,1119;ReMap ChIP-seq,99;GTEx Coexpression,136	STEAP1B,FABP5,CD109,SSPN,SNAI2
CDKN2D	1.06056e-09	0.671623	0.692	0.105	2.80888e-05		188	NKX32	314	ARCHS4 Coexpression,300;GTEx Coexpression,328	ANO1,HOXD11
MTL5	1.10862e-09	0.299306	0.385	0.024	2.93617e-05		189	HOXC13	315.7	ARCHS4 Coexpression,808;Enrichr Queries,42;GTEx Coexpression,97	CASP14,SFRP1,MMP13,KRT17,FST,KRT14,PKP1,HOXD11,SERPINB5
NDFIP2	1.44443e-09	1.67684	1	0.397	3.82558e-05		190	CREB5	316	ARCHS4 Coexpression,82;Enrichr Queries,347;GTEx Coexpression,519	SFRP1,PLAU,SLC1A3,S100A8
FAP	1.80817e-09	0.624136	0.462	0.043	4.78893e-05		191	ZFP37	317	ARCHS4 Coexpression,112;Enrichr Queries,344;GTEx Coexpression,495	SFRP1,PCDHB2,FST
FERMT1	1.92815e-09	0.530097	0.538	0.062	5.10672e-05		192	ZBTB16	320	ARCHS4 Coexpression,561;Enrichr Queries,335;ReMap ChIP-seq,127;GTEx Coexpression,257	SFRP1,SSPN,BBOX1-AS1,S100A8
NUAK1	1.99297e-09	0.268042	0.615	0.077	5.27837e-05		193	PDX1	321.4	Literature ChIP-seq,142;ARCHS4 Coexpression,496;Enrichr Queries,171;ReMap ChIP-seq,123;GTEx Coexpression,675	BCL11B,SSPN,BBOX1-AS1,ADH7,HOXD11
COL4A6	2.69619e-09	0.341218	0.231	0.005	7.14086e-05		194	MEF2A	323	Literature ChIP-seq,74;ARCHS4 Coexpression,204;ENCODE ChIP-seq,108;Enrichr Queries,1152;ReMap ChIP-seq,89;GTEx Coexpression,311	PLAU,CD109,SSPN,SLC1A3
FIBIN	2.69619e-09	1.81081	0.231	0.005	7.14086e-05		195	LHX1	324.5	ARCHS4 Coexpression,462;Enrichr Queries,187	SFRP1,BCL11B,FST
TRO	2.69619e-09	0.272853	0.231	0.005	7.14086e-05		196	ETS1	326.3	Literature ChIP-seq,132;ARCHS4 Coexpression,243;ENCODE ChIP-seq,69;Enrichr Queries,419;ReMap ChIP-seq,109;GTEx Coexpression,986	BCL11B,PLAU,HOXA3,SNAI2,TMEM40
GCNT1	2.86567e-09	0.28438	0.308	0.014	7.58972e-05		197	BATF	327.8	ARCHS4 Coexpression,630;ENCODE ChIP-seq,41;Enrichr Queries,471;ReMap ChIP-seq,144;GTEx Coexpression,353	AIM2,FABP5,S100A8
CCDC34	3.29621e-09	0.37446	0.692	0.11	8.73002e-05		198	RXRA	328	Literature ChIP-seq,50;ARCHS4 Coexpression,482;ENCODE ChIP-seq,110;Enrichr Queries,952;ReMap ChIP-seq,237;GTEx Coexpression,137	CASP14,GPR87,PKP1,SNAI2,DSG3,SERPINB5,S100A8
PTHLH	3.42706e-09	1.21811	0.308	0.014	9.07656e-05		199	MAFB	328.3	ARCHS4 Coexpression,823;Enrichr Queries,423;ReMap ChIP-seq,13;GTEx Coexpression,54	BCL11B,GPR87,MIR205HG,SERPINB5,CASP14,KRT17,KRT16,PLAU,KRT14,GJB5,PKP1,S100A8,KRT6A
EFNB1	3.60102e-09	0.858902	0.692	0.11	9.5373e-05		200	FERD3L	328.7	ARCHS4 Coexpression,551;Enrichr Queries,302;GTEx Coexpression,133	STEAP1B,CD109,SNAI2,ADH7,HOXD11
AKR1B10	3.74655e-09	0.632282	0.308	0.014	9.92275e-05		201	EBF2	330	ARCHS4 Coexpression,367;GTEx Coexpression,293	MFAP5,PCDHB2
SOX7	3.74655e-09	0.332167	0.308	0.014	9.92275e-05		202	TEAD2	330.5	ARCHS4 Coexpression,89;Enrichr Queries,251;ReMap ChIP-seq,274;GTEx Coexpression,708	SFRP1,PLAU,FST,MDFI
TGFBR1	4.03588e-09	0.59657	0.692	0.115	0.00010689		203	OLIG3	332.3	ARCHS4 Coexpression,705;Enrichr Queries,184;GTEx Coexpression,108	SFRP1,GPR87,FST,GJB5,CLCA2,HOXA3,PKP1,SERPINB5
NOV	4.09497e-09	0.510601	0.308	0.014	0.000108455		204	TAL1	332.8	Literature ChIP-seq,113;ARCHS4 Coexpression,245;ENCODE ChIP-seq,43;Enrichr Queries,445;ReMap ChIP-seq,194;GTEx Coexpression,957	SFRP1,HOXA3,SAA1,TMEM40,SLC1A3,S100A8
ABRACL	4.15477e-09	0.567133	0.846	0.187	0.000110039		205	FOSL2	333.2	ARCHS4 Coexpression,507;ENCODE ChIP-seq,5;Enrichr Queries,639;ReMap ChIP-seq,64;GTEx Coexpression,451	PLAU,CD109,GPR87,PKP1,KRT5,UGT1A6
CSPG4	4.88893e-09	0.253815	0.308	0.014	0.000129483		206	GCM2	333.3	ARCHS4 Coexpression,262;Enrichr Queries,491;GTEx Coexpression,247	CD109,ADH7
PHLDA1	5.12534e-09	1.0501	0.846	0.211	0.000135745		207	PROX1	334.5	ARCHS4 Coexpression,416;Enrichr Queries,238;ReMap ChIP-seq,7;GTEx Coexpression,677	SFRP1,BCL11B,CD109,FST,HOXA3,PKP1,SNAI2,KRT5,KRT6A
PHLDA3	5.31119e-09	1.2855	0.615	0.096	0.000140667		208	GATA1	335	Literature ChIP-seq,75;ARCHS4 Coexpression,305;ENCODE ChIP-seq,37;Enrichr Queries,727;ReMap ChIP-seq,171;GTEx Coexpression,695	ANO1,CLCA2,SSPN,TMEM40,PKP1,S100A8
LMO7	5.5148e-09	-3.30713	0.154	0.981	0.000146059		209	HOXC10	336	ARCHS4 Coexpression,373;Enrichr Queries,21;GTEx Coexpression,614	SFRP1,PLAU,FST,HOXA3,SNAI2,HOXD11
DKK3	5.89624e-09	1.83724	0.538	0.072	0.000156162		210	EBF3	336	ARCHS4 Coexpression,591;Enrichr Queries,129;GTEx Coexpression,288	MFAP5,SFRP1,BCL11B,FST,SNAI2
MT1X	6.09757e-09	1.54924	1	0.421	0.000161494		211	NPAS3	337.7	ARCHS4 Coexpression,368;Enrichr Queries,416;GTEx Coexpression,229	BCL11B,SLC1A3
AFAP1L2	6.21553e-09	0.450877	0.385	0.029	0.000164618		212	HES5	338.7	ARCHS4 Coexpression,632;Enrichr Queries,140;GTEx Coexpression,244	SFRP1,PLAU,FST,SLC1A3
TGFBI	6.58557e-09	4.08525	0.846	0.292	0.000174419		213	TRERF1	341.3	ARCHS4 Coexpression,508;Enrichr Queries,466;GTEx Coexpression,50	FABP5,BCL11B,PLAU,MIR205HG,GPR87,GJB5,CLCA2,TMEM40,DSG3
PGAP1	7.03658e-09	0.378502	0.615	0.086	0.000186364		214	ZNF175	341.8	ARCHS4 Coexpression,211;Enrichr Queries,615;ReMap ChIP-seq,151;GTEx Coexpression,390	PLAU,FST,TMEM40
CLDN3	7.20728e-09	-3.8512	0.231	0.986	0.000190885		215	ZNF532	342.7	ARCHS4 Coexpression,84;Enrichr Queries,384;GTEx Coexpression,560	SFRP1,PCDHB2,SLC1A3,SNAI2
SELENBP1	7.76945e-09	-3.70791	0.154	0.971	0.000205774		216	EN1	345	ARCHS4 Coexpression,820;Enrichr Queries,31;GTEx Coexpression,184	CASP14,SFRP1,BCL11B,FST,PKP1,SNAI2,HOXD11
TFPT	8.22251e-09	0.535331	0.846	0.182	0.000217773		217	BCL6	345.8	Literature ChIP-seq,64;ARCHS4 Coexpression,348;Enrichr Queries,595;ReMap ChIP-seq,112;GTEx Coexpression,610	KRT17,KRT16,GPR87,HOXA3,SSPN,S100A8
TMC5	9.13983e-09	-2.57217	0.231	0.986	0.000242068		218	POU3F2	346.3	Literature ChIP-seq,67;ARCHS4 Coexpression,913;Enrichr Queries,213;GTEx Coexpression,192	SFRP1,MMP13,BCL11B,PCDHB2,FST,SLC1A3,GJB7
C16orf74	9.17236e-09	0.393947	0.692	0.12	0.00024293		219	ASCL1	346.3	ARCHS4 Coexpression,94;Enrichr Queries,82;ReMap ChIP-seq,102;GTEx Coexpression,1107	SFRP1,AIM2,BCL11B,PCDHB2,FST,PKP1,SLC1A3,S100A7
LRCH1	9.47635e-09	0.254075	0.385	0.029	0.000250981		220	TCF21	348	Literature ChIP-seq,83;ARCHS4 Coexpression,169;Enrichr Queries,358;GTEx Coexpression,782	SFRP1,MMP13,PLAU,SNAI2,TMEM40
PAFAH1B2	9.6849e-09	1.71703	1	0.536	0.000256505		221	EGR1	349	Literature ChIP-seq,21;ARCHS4 Coexpression,1264;ENCODE ChIP-seq,89;Enrichr Queries,255;ReMap ChIP-seq,270;GTEx Coexpression,195	ANXA8L1,PLAU,KRT16,FST,KRT14,S100A8
SFTA2	1.01037e-08	-2.68011	0	0.947	0.000267596		222	IRF1	351	Literature ChIP-seq,147;ARCHS4 Coexpression,648;ENCODE ChIP-seq,90;Enrichr Queries,314;ReMap ChIP-seq,155;GTEx Coexpression,752	FABP5,PLAU,S100A8
TNFAIP2	1.03279e-08	2.48828	0.538	0.072	0.000273533		223	SNAI1	355	ARCHS4 Coexpression,568;Enrichr Queries,233;GTEx Coexpression,264	PLAU,FST,SNAI2
SLC34A2	1.04033e-08	-3.44266	0.154	0.981	0.000275532		224	ELF5	355.2	Literature ChIP-seq,88;ARCHS4 Coexpression,1494;Enrichr Queries,7;ReMap ChIP-seq,39;GTEx Coexpression,148	ANO1,SFRP1,KRT17,FABP5,PCDHB2,KRT14,CLCA2,BBOX1-AS1,KRT5,ADH7,SERPINB5,S100A8
SFTPB	1.19454e-08	-7.95689	0	0.943	0.000316375		225	ZFP69B	355.5	ARCHS4 Coexpression,187;GTEx Coexpression,524	PCDHB2
LAPTM5	1.34119e-08	1.58832	0.615	0.105	0.000355214		226	TAL2	357.7	ARCHS4 Coexpression,197;Enrichr Queries,149;GTEx Coexpression,727	SFRP1,PCDHB2,PLAU,FST,ADH7
LYPD2	1.43086e-08	1.69513	0.154	0	0.000378963		227	ETV7	359	ARCHS4 Coexpression,489;Enrichr Queries,478;GTEx Coexpression,110	CASP14,AIM2,KRT14,GJB5,PKP1,SERPINB5
P2RY1	1.43086e-08	0.882714	0.154	0	0.000378963		228	RUNX3	359.2	ARCHS4 Coexpression,359;ENCODE ChIP-seq,51;Enrichr Queries,476;ReMap ChIP-seq,87;GTEx Coexpression,823	AIM2,BCL11B,PLAU,DGKH
DSP	1.43871e-08	2.49395	1	0.383	0.000381043		229	KDM2B	360.5	ARCHS4 Coexpression,621;GTEx Coexpression,100	CASP14,GPR87,GJB5,PKP1,SERPINB5
IFITM10	1.58653e-08	0.58363	0.615	0.096	0.000420191		230	NR3C1	361.7	Literature ChIP-seq,62;ARCHS4 Coexpression,509;ENCODE ChIP-seq,8;Enrichr Queries,1223;ReMap ChIP-seq,114;GTEx Coexpression,254	ANXA8L1,PLAU,CD109,SSPN,SAA1,PKP1,AKR1C2,SNAI2,ANXA8,KRT5,KRT6A,DGKH
TMEM45A	1.73206e-08	1.29911	0.462	0.053	0.000458735		231	SIX2	362	ARCHS4 Coexpression,195;Enrichr Queries,130;ReMap ChIP-seq,22;GTEx Coexpression,1101	ANO1,SFRP1,BCL11B,FST,HOXA3,SNAI2,BBOX1-AS1,HOXD11,ADH7
PLP2	1.83151e-08	1.2514	0.769	0.182	0.000485075		232	SPI1	362.7	Literature ChIP-seq,70;ARCHS4 Coexpression,690;ENCODE ChIP-seq,53;Enrichr Queries,715;ReMap ChIP-seq,167;GTEx Coexpression,481	PLAU,KRT16,MIR205HG,GPR87,IGFL1,S100A8
AQP4	1.96239e-08	-5.28528	0	0.928	0.000519738		233	EOMES	362.8	Literature ChIP-seq,37;ARCHS4 Coexpression,837;Enrichr Queries,135;ReMap ChIP-seq,4;GTEx Coexpression,801	BCL11B,FST,TMEM40,SLC1A3,BBOX1-AS1,IGFL1,ANO1,SFRP1,FABP5,PLAU,GJB5,SSPN,HOXA3,S100A8
RGS16	1.96239e-08	-3.98538	0	0.928	0.000519738		234	STAT1	363.7	Literature ChIP-seq,25;ARCHS4 Coexpression,873;ENCODE ChIP-seq,15;Enrichr Queries,366;ReMap ChIP-seq,186;GTEx Coexpression,717	SFRP1,AIM2,KRT17,PLAU,S100A8,KRT6A,S100A7
MSLN	2.16749e-08	-3.59632	0.077	0.938	0.000574059		235	KLF12	363.7	ARCHS4 Coexpression,224;Enrichr Queries,627;GTEx Coexpression,240	BCL11B,SSPN
ITGA2	2.19068e-08	0.729229	0.692	0.12	0.000580203		236	SALL2	363.7	ARCHS4 Coexpression,257;Enrichr Queries,380;GTEx Coexpression,454	SFRP1,FST
S100A2	2.30552e-08	1.85444	0.846	0.254	0.000610617		237	CEBPD	364.4	Literature ChIP-seq,42;ARCHS4 Coexpression,814;ENCODE ChIP-seq,105;ReMap ChIP-seq,195;GTEx Coexpression,666	PLAU,FST,SLC1A3
NEDD4	2.49557e-08	0.303994	0.462	0.048	0.000660951		238	HOXA7	366.7	ARCHS4 Coexpression,186;Enrichr Queries,20;GTEx Coexpression,894	SFRP1,PLAU,FST,HOXA3,SNAI2,HOXD11
C4BPA	2.71858e-08	-4.20571	0	0.919	0.000720017		239	CASZ1	368.3	ARCHS4 Coexpression,328;Enrichr Queries,696;GTEx Coexpression,81	CASP14,BCL11B,GPR87,KRT14,GJB5,PKP1,SERPINB5
SMAGP	2.93955e-08	0.367508	0.538	0.072	0.00077854		240	NR5A2	368.5	ARCHS4 Coexpression,394;Enrichr Queries,354;ReMap ChIP-seq,76;GTEx Coexpression,650	PLAU,FST,PKP1,S100A8
ADAM19	3.1877e-08	0.526596	0.385	0.033	0.000844263		241	TCF7	369.6	Literature ChIP-seq,99;ARCHS4 Coexpression,196;Enrichr Queries,686;ReMap ChIP-seq,259;GTEx Coexpression,608	BCL11B,TMEM40
SUSD2	3.195e-08	-3.2715	0	0.914	0.000846195		242	ZNF521	370.3	ARCHS4 Coexpression,322;Enrichr Queries,208;GTEx Coexpression,581	SFRP1,PCDHB2,FST,SNAI2
CYB5R4	3.23019e-08	0.309169	0.615	0.096	0.000855517		243	FOXA2	370.7	Literature ChIP-seq,108;ARCHS4 Coexpression,607;ENCODE ChIP-seq,28;Enrichr Queries,84;ReMap ChIP-seq,111;GTEx Coexpression,1286	ANO1,SFRP1,ANXA8L1,FST,CD109,HOXA3,SNAI2,AKR1C2,BBOX1-AS1,ANXA8
TYMP	3.37494e-08	2.82948	1	0.856	0.000893852		244	ZNF589	372.8	ARCHS4 Coexpression,281;Enrichr Queries,563;ReMap ChIP-seq,288;GTEx Coexpression,359	SFRP1,AIM2,PLAU
MICALL2	3.46744e-08	0.579278	0.846	0.206	0.000918352		245	TBX4	373.3	ARCHS4 Coexpression,742;Enrichr Queries,93;GTEx Coexpression,285	SFRP1,BCL11B,SNAI2,HOXD11,DGKH
SH3PXD2A	3.52909e-08	0.599126	0.692	0.129	0.000934681		246	OTX1	373.3	ARCHS4 Coexpression,868;Enrichr Queries,180;GTEx Coexpression,72	CASP14,SFRP1,BCL11B,GPR87,FST,KRT14,GJB5,PKP1,SERPINB5
CPE	3.5608e-08	0.599842	0.462	0.053	0.000943078		247	CEBPB	374.3	Literature ChIP-seq,52;ARCHS4 Coexpression,894;ENCODE ChIP-seq,13;Enrichr Queries,351;ReMap ChIP-seq,57;GTEx Coexpression,879	FABP5,PLAU,FST,HOXA3,SSPN,SNAI2,HOXD11,S100A8
KLC3	3.5608e-08	0.462973	0.462	0.053	0.000943078		248	ZIC2	375.7	ARCHS4 Coexpression,271;Enrichr Queries,451;GTEx Coexpression,405	SFRP1,FST
TNFAIP8	3.7149e-08	1.31664	0.692	0.153	0.000983892		249	NHLH1	380	ARCHS4 Coexpression,463;Enrichr Queries,360;GTEx Coexpression,317	AIM2,BCL11B,FST
CLDN18	3.75114e-08	-4.47255	0	0.909	0.000993488		250	CREB3L1	381.5	ARCHS4 Coexpression,49;Enrichr Queries,215;ReMap ChIP-seq,267;GTEx Coexpression,995	MFAP5,PLAU,FST,SNAI2
NAPSA	3.75114e-08	-4.76082	0	0.909	0.000993488		251	PAX6	381.8	Literature ChIP-seq,34;ARCHS4 Coexpression,511;Enrichr Queries,337;ReMap ChIP-seq,75;GTEx Coexpression,952	CASP14,SFRP1,PLAU,SSPN,SLC1A3,KRT5,HOXD11
ITGA6	3.90802e-08	1.95226	0.769	0.201	0.00103504		252	IRF8	382.5	Literature ChIP-seq,143;ARCHS4 Coexpression,723;Enrichr Queries,327;GTEx Coexpression,337	AIM2,PLAU,S100A8
PC	4.19595e-08	0.434211	0.462	0.053	0.0011113		253	BATF2	384.7	ARCHS4 Coexpression,504;Enrichr Queries,349;GTEx Coexpression,301	AIM2,S100A8
RRM1	4.70586e-08	0.668741	0.846	0.23	0.00124635		254	NKX28	385	ARCHS4 Coexpression,47;GTEx Coexpression,723	ANXA8L1,ANXA8,HOXD11
G3BP1	4.76182e-08	2.25441	1	0.804	0.00126117		255	GATA2	385	Literature ChIP-seq,29;ARCHS4 Coexpression,1333;ENCODE ChIP-seq,24;Enrichr Queries,610;ReMap ChIP-seq,93;GTEx Coexpression,221	PLAU,FST,CD109,HOXA3,SSPN,SNAI2,HOXD11
LINC01296	4.94037e-08	0.372896	0.462	0.053	0.00130846		256	ZBTB12	386.7	ARCHS4 Coexpression,420;Enrichr Queries,589;GTEx Coexpression,151	STEAP1B,FST,SNAI2
CYP4B1	5.08737e-08	-3.99218	0.077	0.923	0.00134739		257	ONECUT2	387	ARCHS4 Coexpression,341;Enrichr Queries,234;GTEx Coexpression,586	SFRP1,BCL11B,PCDHB2,FST
TCF4	5.20472e-08	0.328276	0.538	0.077	0.00137847		258	CREB3L3	387.3	ARCHS4 Coexpression,567;Enrichr Queries,414;GTEx Coexpression,181	FST,SAA1,SAA2,ADH7
TPX2	5.21584e-08	0.291873	0.462	0.053	0.00138141		259	TBX2	387.7	ARCHS4 Coexpression,731;Enrichr Queries,142;GTEx Coexpression,290	ANO1,SFRP1,FST,SNAI2,DGKH
CD55	5.79074e-08	-3.78929	0.615	0.981	0.00153368		260	NFATC1	388.4	ARCHS4 Coexpression,914;ENCODE ChIP-seq,101;Enrichr Queries,389;ReMap ChIP-seq,215;GTEx Coexpression,323	BCL11B,PLAU,SSPN
SERPINB3	5.84491e-08	1.2464	0.308	0.019	0.00154802		261	MSX2	389.3	ARCHS4 Coexpression,727;Enrichr Queries,280;GTEx Coexpression,161	SFRP1,CD109,FST,SNAI2
TFPI2	5.84491e-08	0.420133	0.308	0.019	0.00154802		262	LHX2	390.3	ARCHS4 Coexpression,1226;Enrichr Queries,100;ReMap ChIP-seq,26;GTEx Coexpression,209	SFRP1,MMP13,BCL11B,PLAU,GPR87,FST,CLCA2,SLC1A3
SFTPD	6.03427e-08	-4.9562	0	0.895	0.00159818		263	USF1	391.2	ARCHS4 Coexpression,477;ENCODE ChIP-seq,71;Enrichr Queries,673;ReMap ChIP-seq,62;GTEx Coexpression,673	PLAU,HOXA3,SSPN,HOXD11
APOBEC3C	6.08474e-08	0.727118	0.538	0.081	0.00161154		264	HIF3A	393.3	ARCHS4 Coexpression,360;Enrichr Queries,554;GTEx Coexpression,266	SFRP1,PLAU,HOXA3
SH3GL3	6.31306e-08	0.264861	0.308	0.019	0.00167202		265	IRF9	393.5	ARCHS4 Coexpression,526;Enrichr Queries,490;ReMap ChIP-seq,276;GTEx Coexpression,282	AIM2,S100A8
ITGB8	6.90667e-08	0.86611	0.846	0.201	0.00182923		266	ARID3A	395.6	ARCHS4 Coexpression,660;ENCODE ChIP-seq,92;Enrichr Queries,636;ReMap ChIP-seq,226;GTEx Coexpression,364	AIM2,PLAU
SYBU	6.98629e-08	0.6473	0.538	0.081	0.00185032		267	DACH1	397.7	Literature ChIP-seq,124;ARCHS4 Coexpression,851;Enrichr Queries,218	SFRP1,BCL11B,FST,SSPN
ZFX	7.10736e-08	0.555182	1	0.354	0.00188238		268	SP4	399	ARCHS4 Coexpression,241;ENCODE ChIP-seq,102;Enrichr Queries,632;ReMap ChIP-seq,179;GTEx Coexpression,841	BCL11B,HOXD11
MMP3	7.94597e-08	0.72548	0.308	0.019	0.00210449		269	POU2F2	399.4	ARCHS4 Coexpression,633;ENCODE ChIP-seq,99;Enrichr Queries,711;ReMap ChIP-seq,241;GTEx Coexpression,313	AIM2,PLAU
MUC1	8.1981e-08	-3.12232	0.846	0.981	0.00217127		270	PITX2	400.3	ARCHS4 Coexpression,108;Enrichr Queries,147;GTEx Coexpression,946	SFRP1,BCL11B,FABP5,FST,SNAI2
LINC01503	8.32098e-08	0.548151	0.538	0.077	0.00220381		271	BACH2	400.8	ARCHS4 Coexpression,299;Enrichr Queries,549;ReMap ChIP-seq,88;GTEx Coexpression,667	BCL11B,SSPN,TMEM40
TUBB6	8.37982e-08	1.16588	0.615	0.115	0.0022194		272	ETS2	400.8	Literature ChIP-seq,150;ARCHS4 Coexpression,938;Enrichr Queries,396;GTEx Coexpression,119	CASP14,PLAU,KRT14,PKP1,SERPINB5,S100A8
ATP13A4	8.83465e-08	-2.60194	0.077	0.9	0.00233986		273	EGR2	401	ARCHS4 Coexpression,745;Enrichr Queries,281;GTEx Coexpression,177	MFAP5,PODNL1,PLAU,FST,S100A8
SPHK1	9.19348e-08	0.501975	0.538	0.081	0.00243489		274	HMX3	401.3	ARCHS4 Coexpression,516;Enrichr Queries,301;GTEx Coexpression,387	BCL11B,HOXD11
CCNC	9.93885e-08	1.03525	1	0.474	0.00263231		275	ZHX1	403.3	ARCHS4 Coexpression,470;Enrichr Queries,860;ReMap ChIP-seq,188;GTEx Coexpression,95	FABP5,CLCA2,HOXA3,TMEM40,DSG3,ADH7
SULF2	1.00692e-07	1.26011	0.538	0.081	0.00266682		276	ZFHX3	404.7	ARCHS4 Coexpression,350;Enrichr Queries,614;GTEx Coexpression,250	BCL11B,SSPN,DGKH
AQP1	1.12149e-07	-3.54271	0	0.876	0.00297027		277	MAX	405.4	ARCHS4 Coexpression,146;ENCODE ChIP-seq,59;Enrichr Queries,834;ReMap ChIP-seq,183;GTEx Coexpression,805	PLAU,HOXA3,TMEM40,S100A8
COL1A2	1.19055e-07	1.60941	0.538	0.086	0.00315318		278	SMAD3	405.6	Literature ChIP-seq,1;ARCHS4 Coexpression,987;Enrichr Queries,571;ReMap ChIP-seq,66;GTEx Coexpression,403	ANXA8L1,FST,GPR87,SLC1A3,AKR1C2,BBOX1-AS1,KRT5,HOXD11,SERPINB5,ANO1,MMP13,KRT17,PLAU,KRT16,CD109,KRT14,HOXA3,PKP1,SNAI2,DSG3,MDFI,DGKH,KRT6A,UGT1A6
GPRC5A	1.2606e-07	-2.7154	0.231	0.952	0.0033387		279	LYL1	406	Literature ChIP-seq,139;ARCHS4 Coexpression,417;Enrichr Queries,702;ReMap ChIP-seq,153;GTEx Coexpression,619	S100A8
GBP1P1	1.26636e-07	0.637373	0.769	0.177	0.00335396		280	ZNF385D	407.7	ARCHS4 Coexpression,191;Enrichr Queries,713;GTEx Coexpression,319	ANO1,SFRP1,TMEM40
CCL20	1.27584e-07	1.11221	0.385	0.038	0.00337905		281	CEBPE	410.7	ARCHS4 Coexpression,354;Enrichr Queries,474;GTEx Coexpression,404	PLAU,S100A8
EIF3E	1.29948e-07	1.89926	1	0.718	0.00344167		282	POU5F1	411.2	Literature ChIP-seq,23;ARCHS4 Coexpression,333;Enrichr Queries,597;ReMap ChIP-seq,68;GTEx Coexpression,1035	SFRP1,BCL11B,PLAU,FST,CD109,GJB5,HOXA3,HOXD11
SCGB3A1	1.38605e-07	-4.82151	0.077	0.885	0.00367096		283	PRDM14	411.8	Literature ChIP-seq,92;ARCHS4 Coexpression,219;Enrichr Queries,316;ReMap ChIP-seq,154;GTEx Coexpression,1278	SFRP1,BCL11B,CD109,KRT14,HOXD11,MDFI
PNKD	1.41903e-07	-1.85038	0.615	0.976	0.0037583		284	IRF4	412.4	ARCHS4 Coexpression,785;ENCODE ChIP-seq,54;Enrichr Queries,708;ReMap ChIP-seq,115;GTEx Coexpression,400	AIM2,STEAP1B,FABP5,PLAU,S100A8
HOPX	1.47121e-07	-2.60991	0.154	0.923	0.00389649		285	SRF	413.8	Literature ChIP-seq,134;ARCHS4 Coexpression,754;ENCODE ChIP-seq,26;Enrichr Queries,1100;ReMap ChIP-seq,242;GTEx Coexpression,227	AIM2,HOXA3,DGKH
PDE7A	1.48817e-07	0.749208	0.692	0.153	0.00394142		286	NFIL3	414.3	ARCHS4 Coexpression,310;Enrichr Queries,439;GTEx Coexpression,494	PLAU,S100A8
ZNF623	1.48964e-07	0.463973	0.615	0.105	0.00394532		287	ETV3L	415.7	ARCHS4 Coexpression,595;Enrichr Queries,138;GTEx Coexpression,514	AIM2,PLAU,PKP1,SLC1A3
CADM1	1.51971e-07	-1.90879	0	0.866	0.00402496		288	ZNF219	416	ARCHS4 Coexpression,260;Enrichr Queries,607;GTEx Coexpression,381	PLAU,HOXA3,MDFI
CCDC50	1.52534e-07	0.330319	0.385	0.038	0.00403986		289	ELK1	417	Literature ChIP-seq,101;ARCHS4 Coexpression,1366;ENCODE ChIP-seq,83;ReMap ChIP-seq,204;GTEx Coexpression,331	PLAU,SLC1A3,DGKH
CXCL11	1.54982e-07	1.30208	0.231	0.01	0.0041047		290	POU4F2	417	ARCHS4 Coexpression,442;Enrichr Queries,185;ReMap ChIP-seq,152;GTEx Coexpression,889	SFRP1,BCL11B,SSPN,HOXD11
DAPL1	1.54982e-07	0.270779	0.231	0.01	0.0041047		291	SOX11	417.6	Literature ChIP-seq,111;ARCHS4 Coexpression,60;Enrichr Queries,243;ReMap ChIP-seq,94;GTEx Coexpression,1580	SFRP1,MMP13,BCL11B,PCDHB2,GPR87,FST,CD109
LOC344887	1.54982e-07	0.350601	0.231	0.01	0.0041047		292	ELF3	418.8	ARCHS4 Coexpression,326;Enrichr Queries,623;ReMap ChIP-seq,97;GTEx Coexpression,629	PLAU,MIR205HG,ADH7
MATN2	1.54982e-07	0.363831	0.231	0.01	0.0041047		293	SCMH1	420	ARCHS4 Coexpression,620;GTEx Coexpression,220	HOXA3
TREM2	1.54982e-07	0.442309	0.231	0.01	0.0041047		294	NFE2L2	420.4	Literature ChIP-seq,86;ARCHS4 Coexpression,559;Enrichr Queries,1246;ReMap ChIP-seq,198;GTEx Coexpression,13	FABP5,MIR205HG,GPR87,GJB5,CLCA2,SSPN,TMEM40,KRT5,DSG3,ADH7,SERPINB5
TPD52L1	1.58191e-07	0.911963	1	0.325	0.0041897		295	CEBPA	421.2	Literature ChIP-seq,45;ARCHS4 Coexpression,1206;Enrichr Queries,440;ReMap ChIP-seq,61;GTEx Coexpression,354	MFAP5,CASP14,PLAU,FST,SAA1,AKR1C2,SAA2,SNAI2,KRT5,IGFL1,S100A8,KRT6A
EDARADD	1.59612e-07	0.609993	0.615	0.129	0.00422733		296	PAX3	424.3	ARCHS4 Coexpression,282;Enrichr Queries,127;GTEx Coexpression,864	SFRP1,BCL11B,PCDHB2,FST,SNAI2
TNFSF10	1.66415e-07	2.27379	1	0.77	0.0044075		297	FOXA1	426	Literature ChIP-seq,44;ARCHS4 Coexpression,773;ENCODE ChIP-seq,49;Enrichr Queries,236;ReMap ChIP-seq,148;GTEx Coexpression,1306	ANO1,FABP5,FST,HOXA3,SSPN,SNAI2,TMEM40,PKP1,ADH7,S100A7
SERPINA3	1.70222e-07	2.29671	0.231	0.01	0.00450833		298	FOXD2	426.7	ARCHS4 Coexpression,812;Enrichr Queries,279;GTEx Coexpression,189	MFAP5,SFRP1,PODNL1,BCL11B,FST
RHOV	1.71723e-07	1.09558	0.385	0.038	0.00454809		299	ANHX	427	ARCHS4 Coexpression,440;GTEx Coexpression,414
AGER	1.86676e-07	-4.10531	0.077	0.871	0.00494411		300	STAT5A	427.8	Literature ChIP-seq,57;ARCHS4 Coexpression,744;ENCODE ChIP-seq,104;Enrichr Queries,629;ReMap ChIP-seq,217;GTEx Coexpression,816	PLAU,SAA1,SERPINB5,S100A8
MPPED2	1.86907e-07	0.416071	0.231	0.01	0.00495022		301	ZNF438	429.3	ARCHS4 Coexpression,125;Enrichr Queries,598;GTEx Coexpression,565	SLC1A3,TMEM40
TMEM158	1.86907e-07	0.399532	0.231	0.01	0.00495022		302	RAG1	431	ARCHS4 Coexpression,78;Enrichr Queries,289;GTEx Coexpression,926	BCL11B,PLAU,S100A8,MDFI
BDKRB2	1.95111e-07	0.409917	0.462	0.057	0.00516751		303	NR4A2	431.8	Literature ChIP-seq,152;ARCHS4 Coexpression,640;Enrichr Queries,644;GTEx Coexpression,291	FST,SLC1A3
LAMB3	1.96337e-07	2.19778	0.692	0.172	0.00519998		304	VAX2	432.3	ARCHS4 Coexpression,221;Enrichr Queries,179;GTEx Coexpression,897	ANO1,SFRP1,BCL11B,HOXD11
GDF15	2.05109e-07	-4.45831	0	0.856	0.00543232		305	DMRT1	433	Literature ChIP-seq,118;ARCHS4 Coexpression,599;Enrichr Queries,32;GTEx Coexpression,983	SFRP1,BCL11B,FST,SSPN,ANXA8,ADH7,HOXD11
NDNF	2.05109e-07	-2.11686	0	0.856	0.00543232		306	PROP1	434.3	ARCHS4 Coexpression,973;Enrichr Queries,74;GTEx Coexpression,256	MMP13,GJB7,SNAI2,ADH7,S100A8
TUSC1	2.06525e-07	0.483978	0.538	0.081	0.00546982		307	FEZF1	435.3	ARCHS4 Coexpression,90;Enrichr Queries,101;GTEx Coexpression,1115	SFRP1,BCL11B,PCDHB2,FST,HOXD11
CYP2B7P	2.15593e-07	-1.94611	0.077	0.871	0.00570999		308	BCL11B	435.8	Literature ChIP-seq,15;ARCHS4 Coexpression,1244;Enrichr Queries,405;GTEx Coexpression,79	CASP14,SFRP1,BCL11B,GPR87,FST,KRT14,GJB5,PKP1,SERPINB5
PRKCDBP	2.15888e-07	0.547727	0.538	0.081	0.00571779		309	SIX1	436	ARCHS4 Coexpression,317;Enrichr Queries,151;GTEx Coexpression,840	SFRP1,PLAU,FST,SSPN,SNAI2
RFT1	2.19892e-07	0.714007	0.692	0.153	0.00582383		310	ZNF436	439	ARCHS4 Coexpression,110;Enrichr Queries,1205;GTEx Coexpression,2	MIR205HG,GPR87,TMEM40,SLC1A3,KRT5,SERPINB5,FABP5,PCDHB2,GJB5,CLCA2,PKP1,DSG3,MDFI
PPP1R14C	2.20204e-07	0.402015	0.538	0.086	0.0058321		311	MYCL	439	ARCHS4 Coexpression,776;GTEx Coexpression,102	CASP14,GPR87,GJB5,PKP1,SERPINB5
ADGRF5	2.37927e-07	-1.32888	0	0.852	0.0063015		312	RREB1	439.3	ARCHS4 Coexpression,600;Enrichr Queries,654;GTEx Coexpression,64	BCL11B,MIR205HG,GPR87,GJB5,CLCA2,TMEM40,KRT5,DSG3
C16orf89	2.37927e-07	-2.81869	0	0.852	0.0063015		313	ZNF778	440	ARCHS4 Coexpression,117;Enrichr Queries,814;GTEx Coexpression,389	TMEM40
CPM	2.42118e-07	-2.14151	0.231	0.909	0.0064125		314	MYB	440	Literature ChIP-seq,100;ARCHS4 Coexpression,439;ENCODE ChIP-seq,111;Enrichr Queries,1060;ReMap ChIP-seq,189;GTEx Coexpression,741	BCL11B
JAG1	2.46402e-07	1.5513	0.923	0.373	0.00652597		315	HOXD11	440.3	ARCHS4 Coexpression,344;Enrichr Queries,12;GTEx Coexpression,965	SFRP1,KRT17,PLAU,FST,HOXA3,SNAI2
HIF1A	2.64157e-07	1.87061	1	0.603	0.00699619		316	FOXP1	440.8	Literature ChIP-seq,12;ARCHS4 Coexpression,1117;Enrichr Queries,635;ReMap ChIP-seq,108;GTEx Coexpression,332	BCL11B,HOXA3,SSPN
NKX2-1	2.68746e-07	-1.48309	0.154	0.895	0.00711774		317	NR4A3	445	ARCHS4 Coexpression,553;Enrichr Queries,411;GTEx Coexpression,371	PLAU,FST,SSPN
RAB40B	2.69198e-07	0.316515	0.538	0.081	0.0071297		318	MYF5	445.7	ARCHS4 Coexpression,91;Enrichr Queries,45;GTEx Coexpression,1201	MMP13,FST,CD109,SNAI2,ADH7,S100A8
SEMA3C	2.71717e-07	0.825193	0.692	0.163	0.00719643		319	FOXM1	447.2	Literature ChIP-seq,82;ARCHS4 Coexpression,481;ENCODE ChIP-seq,35;Enrichr Queries,1002;ReMap ChIP-seq,178;GTEx Coexpression,905	CASP14,PLAU,SSPN,PKP1,SLC1A3,KRT5
ZBP1	2.74577e-07	0.494336	0.385	0.038	0.00727218		320	LEF1	447.5	ARCHS4 Coexpression,222;Enrichr Queries,201;ReMap ChIP-seq,289;GTEx Coexpression,1078	SFRP1,BCL11B,SNAI2
UCHL3	2.7764e-07	0.871569	1	0.388	0.00735329		321	MYBL2	447.7	Literature ChIP-seq,93;ARCHS4 Coexpression,877;ENCODE ChIP-seq,100;Enrichr Queries,888;ReMap ChIP-seq,176;GTEx Coexpression,552	SFRP1,FST,HOXA3,HOXD11
PDLIM5	2.78276e-07	0.658232	0.769	0.206	0.00737014		322	SALL4	447.8	Literature ChIP-seq,76;ARCHS4 Coexpression,259;Enrichr Queries,357;GTEx Coexpression,1099	SFRP1,MMP13,FST
ADM	2.84915e-07	2.90863	0.692	0.177	0.00754598		323	FOXJ1	449.7	ARCHS4 Coexpression,327;Enrichr Queries,394;GTEx Coexpression,628	SFRP1,FST,ADH7
FCF1	2.8952e-07	0.375347	0.923	0.325	0.00766794		324	ZIC5	451	ARCHS4 Coexpression,265;Enrichr Queries,244;GTEx Coexpression,844	SFRP1,BCL11B,FST
RRS1	3.15009e-07	0.406032	0.846	0.196	0.00834302		325	SMAD4	451.4	Literature ChIP-seq,2;ARCHS4 Coexpression,414;Enrichr Queries,957;ReMap ChIP-seq,15;GTEx Coexpression,869	ANXA8L1,BCL11B,FST,GPR87,AKR1C2,BBOX1-AS1,KRT17,GJB5,KRT14,SSPN,GJB7,SNAI2,UGT1A6
TMED2	3.21981e-07	1.78464	1	0.732	0.00852766		326	WT1	453.8	Literature ChIP-seq,80;ARCHS4 Coexpression,220;Enrichr Queries,252;GTEx Coexpression,1263	SFRP1,BCL11B,FABP5,PLAU,FST,GJB5,HOXA3,SSPN,TMEM40,HOXD11
C1orf116	3.23008e-07	-2.60524	0.615	0.962	0.00855488		327	CUX1	454	Literature ChIP-seq,106;ARCHS4 Coexpression,606;ENCODE ChIP-seq,94;Enrichr Queries,839;ReMap ChIP-seq,246;GTEx Coexpression,833	FABP5,GPR87,CLCA2,SLC1A3
LOC401585	3.33819e-07	0.886051	0.538	0.096	0.0088412		328	BRF2	455	ARCHS4 Coexpression,807;ReMap ChIP-seq,131;GTEx Coexpression,427	SAA1
TIMM8A	3.3493e-07	0.527765	0.615	0.124	0.00887062		329	SP1	455.6	ARCHS4 Coexpression,661;ENCODE ChIP-seq,38;Enrichr Queries,821;ReMap ChIP-seq,122;GTEx Coexpression,636	PODNL1,AIM2,HOXA3,HOXD11
GATA6	3.39935e-07	-1.55058	0.154	0.88	0.00900319		330	KLF9	456.3	ARCHS4 Coexpression,115;Enrichr Queries,1093;ReMap ChIP-seq,256;GTEx Coexpression,361	MFAP5,SSPN
FOLR1	3.44157e-07	-3.27088	0.308	0.919	0.009115		331	RELA	457	Literature ChIP-seq,46;ARCHS4 Coexpression,975;ENCODE ChIP-seq,40;Enrichr Queries,662;ReMap ChIP-seq,185;GTEx Coexpression,834	AIM2,PLAU,HOXA3,KRT5,UGT1A6
GBP5	3.53514e-07	0.909216	0.308	0.024	0.00936281		332	NR2F2	457.4	ARCHS4 Coexpression,1516;ENCODE ChIP-seq,64;Enrichr Queries,222;ReMap ChIP-seq,181;GTEx Coexpression,304	MFAP5,SFRP1,STEAP1B,PLAU,FST,SNAI2
MFSD12	3.69546e-07	0.624256	0.692	0.163	0.00978743		333	VDR	457.6	Literature ChIP-seq,36;ARCHS4 Coexpression,711;Enrichr Queries,631;ReMap ChIP-seq,126;GTEx Coexpression,784	PLAU,HOXA3,SSPN,SLC1A3
NCK2	3.81707e-07	1.01429	0.769	0.225	0.0101095		334	HNF4A	458.2	Literature ChIP-seq,125;ARCHS4 Coexpression,704;ENCODE ChIP-seq,68;Enrichr Queries,1006;ReMap ChIP-seq,216;GTEx Coexpression,630	SFRP1,FST,HOXA3,SAA1,SLC1A3,AKR1C2,SNAI2,HOXD11
THBD	3.84851e-07	0.647728	0.462	0.067	0.0101928		335	IKZF1	459.3	Literature ChIP-seq,153;ARCHS4 Coexpression,995;ENCODE ChIP-seq,46;Enrichr Queries,693;ReMap ChIP-seq,182;GTEx Coexpression,687	AIM2,PLAU,SAA2,S100A8,DGKH
EIF3M	4.00762e-07	1.2562	1	0.756	0.0106142		336	BARX1	459.7	ARCHS4 Coexpression,1001;Enrichr Queries,164;GTEx Coexpression,214	SFRP1,HOXA3,HOXD11,MDFI
FANCF	4.02232e-07	0.751168	0.538	0.086	0.0106531		337	ONECUT1	460	ARCHS4 Coexpression,698;Enrichr Queries,333;ReMap ChIP-seq,36;GTEx Coexpression,773	BCL11B,SAA1,AKR1C2,SAA2,HOXD11,ADH7
ATF3	4.034e-07	-2.57241	0.308	0.976	0.010684		338	ATF4	461.3	ARCHS4 Coexpression,458;Enrichr Queries,1033;ReMap ChIP-seq,79;GTEx Coexpression,275	LGALS7B,HOXA3,SNAI2
CDH13	4.0546e-07	0.54008	0.308	0.024	0.0107386		339	MYOD1	462	ARCHS4 Coexpression,468;ENCODE ChIP-seq,16;Enrichr Queries,515;ReMap ChIP-seq,52;GTEx Coexpression,1259	PLAU,FST,SSPN,PKP1,TMEM40,SNAI2,BBOX1-AS1
KRT13	4.19719e-07	0.863971	0.538	0.086	0.0111163		340	ESRRB	463	Literature ChIP-seq,120;ARCHS4 Coexpression,830;Enrichr Queries,346;GTEx Coexpression,556	SFRP1,BCL11B,PLAU
YBX3	4.30143e-07	1.53389	1	0.617	0.0113923		341	HES3	463.7	ARCHS4 Coexpression,286;Enrichr Queries,578;GTEx Coexpression,527	SFRP1,FST
DEFB1	4.34123e-07	0.278339	0.308	0.024	0.0114977		342	SIM1	463.7	ARCHS4 Coexpression,738;Enrichr Queries,527;GTEx Coexpression,126	SFRP1,STEAP1B,CD109,SNAI2
PLXNB1	4.34913e-07	0.269491	0.538	0.081	0.0115187		343	SETBP1	464	ARCHS4 Coexpression,329;Enrichr Queries,827;GTEx Coexpression,236	PCDHB2,SSPN
TMEM125	4.55881e-07	-2.16064	0.231	0.904	0.012074		344	SCRT2	464	ARCHS4 Coexpression,179;Enrichr Queries,630;GTEx Coexpression,583	BCL11B,PCDHB2
EXT2	4.59862e-07	1.00519	0.769	0.206	0.0121795		345	GTF2B	464.8	ARCHS4 Coexpression,1167;ENCODE ChIP-seq,93;ReMap ChIP-seq,170;GTEx Coexpression,429	CD109
LAD1	4.62193e-07	0.841206	0.846	0.249	0.0122412		346	LHX3	465.3	ARCHS4 Coexpression,650;Enrichr Queries,495;GTEx Coexpression,251	HOXA3,GJB7
PKM	4.68094e-07	1.75267	1	0.861	0.0123975		347	E2F1	466.2	Literature ChIP-seq,109;ARCHS4 Coexpression,735;ENCODE ChIP-seq,85;Enrichr Queries,1004;ReMap ChIP-seq,120;GTEx Coexpression,744	BCL11B,HOXA3,HOXD11,DGKH
TNS1	4.86201e-07	-2.02423	0.308	0.933	0.012877		348	NR1H3	466.2	Literature ChIP-seq,91;ARCHS4 Coexpression,622;Enrichr Queries,464;ReMap ChIP-seq,161;GTEx Coexpression,993	PLAU,SLC1A3,S100A8
KIAA0930	4.87334e-07	0.31604	0.846	0.206	0.012907		349	GSC	467	ARCHS4 Coexpression,80;Enrichr Queries,174;GTEx Coexpression,1147	SFRP1,FABP5,FST,HOXD11
SMAD1	4.88307e-07	0.473321	0.769	0.196	0.0129328		350	ZIC4	467.7	ARCHS4 Coexpression,279;Enrichr Queries,306;GTEx Coexpression,818	SFRP1,BCL11B,PCDHB2
FOXA2	4.92308e-07	-1.57027	0	0.828	0.0130388		351	NFE2	469.8	ARCHS4 Coexpression,576;ENCODE ChIP-seq,84;Enrichr Queries,710;ReMap ChIP-seq,199;GTEx Coexpression,780	FABP5,S100A8
IFFO2	5.18745e-07	0.372525	0.538	0.086	0.013739		352	ZNF217	470.3	Literature ChIP-seq,85;ARCHS4 Coexpression,706;ENCODE ChIP-seq,9;Enrichr Queries,1332;ReMap ChIP-seq,43;GTEx Coexpression,647	ANO1,FABP5,GPR87,CD109,PKP1,TMEM40,SNAI2,KRT5,S100A8,UGT1A6
CLDN4	5.22156e-07	-3.23119	0.308	0.995	0.0138293		353	SIX6	470.3	ARCHS4 Coexpression,811;Enrichr Queries,304;GTEx Coexpression,296	BCL11B,GJB7,HOXD11
CTSB	5.31316e-07	3.63719	1	0.665	0.0140719		354	NCOA1	471	ARCHS4 Coexpression,480;Enrichr Queries,988;ReMap ChIP-seq,142;GTEx Coexpression,274	SLC1A3,UGT1A6
ITGB4	5.93108e-07	3.17687	0.769	0.249	0.0157085		355	RORB	473	ARCHS4 Coexpression,784;Enrichr Queries,427;GTEx Coexpression,208	SFRP1,SLC1A3
TMEM65	6.06657e-07	0.305584	0.538	0.091	0.0160673		356	KLF8	473	ARCHS4 Coexpression,1148;Enrichr Queries,245;GTEx Coexpression,26	MIR205HG,GPR87,FST,TMEM40,KRT5,SERPINB5,CASP14,SFRP1,CD109,GJB5,CLCA2,PKP1
SLC39A14	6.14212e-07	0.592058	0.462	0.067	0.0162674		357	HSF1	473.4	Literature ChIP-seq,72;ARCHS4 Coexpression,1360;ENCODE ChIP-seq,116;ReMap ChIP-seq,247;GTEx Coexpression,572	CASP14,GJB5
FAM49B	6.2834e-07	1.02956	0.923	0.493	0.0166416		358	TP53	473.4	Literature ChIP-seq,4;ARCHS4 Coexpression,687;Enrichr Queries,528;ReMap ChIP-seq,18;GTEx Coexpression,1130	LGALS7B,BCL11B,FABP5,KRT17,PLAU,MIR205HG,FST,GPR87,CD109
LDHA	6.31728e-07	2.10904	1	0.914	0.0167313		359	ZNF80	473.7	ARCHS4 Coexpression,859;Enrichr Queries,110;GTEx Coexpression,452	AIM2,BCL11B,ADH7,S100A8
IL1RAP	6.4326e-07	1.21362	0.615	0.139	0.0170368		360	MEOX1	474.7	ARCHS4 Coexpression,32;Enrichr Queries,195;GTEx Coexpression,1197	MFAP5,SFRP1,SAA1,SSPN,SNAI2
AK1	6.61451e-07	-2.61068	0.538	0.943	0.0175185		361	KLF14	475	ARCHS4 Coexpression,562;Enrichr Queries,388	BCL11B,HOXD11
RPL7	6.94507e-07	1.89781	1	0.928	0.018394		362	SP2	477	ARCHS4 Coexpression,684;ENCODE ChIP-seq,55;Enrichr Queries,1058;ReMap ChIP-seq,165;GTEx Coexpression,423	PODNL1
LTB4R	7.45051e-07	0.624112	0.538	0.091	0.0197327		363	TBX22	478	ARCHS4 Coexpression,269;Enrichr Queries,97;GTEx Coexpression,1068	MMP13,FABP5,FST,ADH7,HOXD11
DPP4	7.52561e-07	-1.35006	0	0.813	0.0199316		364	ZNF263	478.3	Literature ChIP-seq,159;ARCHS4 Coexpression,409;ENCODE ChIP-seq,81;Enrichr Queries,946;ReMap ChIP-seq,162;GTEx Coexpression,1113	HOXA3,DGKH
DCUN1D5	7.59636e-07	0.750308	0.846	0.263	0.020119		365	MIXL1	479.3	ARCHS4 Coexpression,379;Enrichr Queries,331;GTEx Coexpression,728	BCL11B,FABP5,FST
CAPZA1	7.59735e-07	1.93375	1	0.919	0.0201216		366	PURG	480	ARCHS4 Coexpression,163;GTEx Coexpression,797	PCDHB2
RECQL4	7.67705e-07	0.38124	0.385	0.043	0.0203327		367	PAX5	480.6	ARCHS4 Coexpression,730;ENCODE ChIP-seq,87;Enrichr Queries,616;ReMap ChIP-seq,200;GTEx Coexpression,770	STEAP1B,BCL11B
SYPL1	7.74777e-07	1.75016	0.923	0.55	0.02052		368	TLX1	481.3	ARCHS4 Coexpression,675;Enrichr Queries,173;GTEx Coexpression,596	SFRP1,BCL11B,HOXD11
PDP1	7.8084e-07	1.13099	0.846	0.311	0.0206805		369	LMX1A	482.3	ARCHS4 Coexpression,805;Enrichr Queries,365;GTEx Coexpression,277	SFRP1,BCL11B,GJB7
YWHAE	8.75486e-07	1.14861	1	0.962	0.0231873		370	PIN1	482.5	ARCHS4 Coexpression,488;GTEx Coexpression,477
WDYHV1	8.8779e-07	0.383276	0.462	0.067	0.0235131		371	NR2C2	483.2	ARCHS4 Coexpression,545;ENCODE ChIP-seq,103;Enrichr Queries,853;ReMap ChIP-seq,234;GTEx Coexpression,681
PRKAA1	9.03653e-07	0.374184	0.846	0.239	0.0239332		372	TCF3	483.7	Literature ChIP-seq,43;ARCHS4 Coexpression,721;ENCODE ChIP-seq,27;Enrichr Queries,1025;ReMap ChIP-seq,273;GTEx Coexpression,813	SFRP1,CD109,GJB5,SSPN,HOXA3,TMEM40,SNAI2,SLC1A3,ADH7,HOXD11
TSPAN9	9.40444e-07	0.570573	0.692	0.167	0.0249077		373	DLX6	483.7	ARCHS4 Coexpression,192;Enrichr Queries,89;GTEx Coexpression,1170	SFRP1,BCL11B,PCDHB2,FST,HOXD11
C1S	9.68884e-07	2.80841	0.846	0.383	0.0256609		374	CBX2	484	ARCHS4 Coexpression,960;ENCODE ChIP-seq,2;Enrichr Queries,971;ReMap ChIP-seq,16;GTEx Coexpression,471	BCL11B,FST,GPR87,IGFL1,HOXD11,MFAP5,ANO1,CD109,SAA2,SNAI2,DSG3,MDFI,S100A8
PCDH7	9.96686e-07	1.03029	0.615	0.134	0.0263972		375	DMRTC2	484.7	ARCHS4 Coexpression,552;Enrichr Queries,44;GTEx Coexpression,858	MMP13,FST,ADH7,HOXD11,S100A8
PRNP	1.01193e-06	2.35555	0.846	0.33	0.0268009		376	RFX4	485	ARCHS4 Coexpression,266;Enrichr Queries,531;GTEx Coexpression,658	SLC1A3
CFI	1.05699e-06	0.923004	0.846	0.301	0.0279943		377	STAT3	485.7	Literature ChIP-seq,38;ARCHS4 Coexpression,833;ENCODE ChIP-seq,3;Enrichr Queries,1220;ReMap ChIP-seq,14;GTEx Coexpression,806	MIR205HG,KRT5,SERPINB5,MFAP5,ANO1,SFRP1,KRT17,PLAU,KRT16,HOXA3,CLCA2,PKP1,SNAI2,S100A8,KRT6A,UGT1A6
LINC00673	1.14351e-06	0.296303	0.538	0.086	0.0302859		378	ZNF404	485.7	ARCHS4 Coexpression,200;Enrichr Queries,329;GTEx Coexpression,928	PCDHB2,SSPN,SLC1A3
YWHAZ	1.17504e-06	1.60666	1	0.976	0.031121		379	GCM1	489	ARCHS4 Coexpression,473;Enrichr Queries,506;GTEx Coexpression,488	ADH7
SLC2A1	1.20158e-06	3.98153	0.846	0.349	0.031824		380	GSX1	489.3	ARCHS4 Coexpression,198;Enrichr Queries,168;GTEx Coexpression,1102	SFRP1,BCL11B,PCDHB2,HOXD11
B3GNT7	1.25053e-06	-2.07841	0.154	0.871	0.0331202		381	NEUROD1	490	ARCHS4 Coexpression,866;Enrichr Queries,359;ReMap ChIP-seq,212;GTEx Coexpression,523	SFRP1,BCL11B
HRH1	1.2525e-06	0.452662	0.462	0.072	0.0331723		382	ZNF274	490.8	Literature ChIP-seq,149;ARCHS4 Coexpression,701;ENCODE ChIP-seq,107;Enrichr Queries,891;ReMap ChIP-seq,84;GTEx Coexpression,1013	PLAU,SLC1A3
CDH3	1.27829e-06	2.66794	0.923	0.589	0.0338555		383	NHLH2	492.7	ARCHS4 Coexpression,736;Enrichr Queries,226;GTEx Coexpression,516	SFRP1,BCL11B,FST
GBP6	1.29234e-06	1.14316	0.538	0.105	0.0342276		384	NEUROG1	493.3	ARCHS4 Coexpression,240;Enrichr Queries,77;GTEx Coexpression,1163	SFRP1,BCL11B,PCDHB2,SNAI2,HOXD11
AQP5	1.30709e-06	-0.959674	0	0.794	0.0346184		385	MEF2B	495.5	ARCHS4 Coexpression,427;Enrichr Queries,1050;ReMap ChIP-seq,125;GTEx Coexpression,380	MFAP5,AIM2,TMEM40
COL27A1	1.39527e-06	0.384236	0.615	0.124	0.0369537		386	CSRNP2	495.5	ARCHS4 Coexpression,404;GTEx Coexpression,587
PERP	1.46159e-06	2.62434	1	0.737	0.0387103		387	CTCF	495.5	Literature ChIP-seq,77;ARCHS4 Coexpression,786;ENCODE ChIP-seq,19;Enrichr Queries,1096;ReMap ChIP-seq,119;GTEx Coexpression,876	ANO1,FABP5,BCL11B,PCDHB2,FST,HOXA3,SSPN,SNAI2,HOXD11,DGKH
MET	1.46212e-06	0.918864	0.692	0.182	0.0387242		388	CENPS	496.5	ARCHS4 Coexpression,454;GTEx Coexpression,539
ZNF529	1.47455e-06	0.659097	0.923	0.316	0.0390535		389	DBX1	496.7	ARCHS4 Coexpression,378;Enrichr Queries,85;GTEx Coexpression,1027	SFRP1,BCL11B,PCDHB2,FST,HOXD11
DSC2	1.49906e-06	0.473923	0.846	0.287	0.0397025		390	LIN28B	496.7	ARCHS4 Coexpression,272;Enrichr Queries,237;GTEx Coexpression,981	SFRP1,BCL11B,FST
GFOD1	1.51628e-06	0.916984	0.615	0.134	0.0401588		391	ZNF17	497	ARCHS4 Coexpression,153;Enrichr Queries,1051;GTEx Coexpression,287	PCDHB2,SSPN
SLC7A5	1.52996e-06	0.985437	0.692	0.191	0.0405211		392	SATB1	497.3	ARCHS4 Coexpression,301;Enrichr Queries,682;ReMap ChIP-seq,40;GTEx Coexpression,966	BCL11B,ADH7,S100A8,S100A7
HACD1	1.53028e-06	0.337123	0.385	0.048	0.0405295		393	TCF20	497.3	ARCHS4 Coexpression,758;Enrichr Queries,679;GTEx Coexpression,55	BCL11B,GPR87,GJB5,CLCA2,TMEM40,PKP1,KRT5,SERPINB5
SERF2	1.57152e-06	-1.75968	1	1	0.0416218		394	MESP2	497.3	ARCHS4 Coexpression,1022;Enrichr Queries,69;GTEx Coexpression,401	SFRP1,BCL11B,FST,PKP1,ADH7
SMPDL3B	1.57408e-06	-2.48217	0.231	0.861	0.0416895		395	ZNF584	499.3	ARCHS4 Coexpression,626;Enrichr Queries,759;ReMap ChIP-seq,133;GTEx Coexpression,479	STEAP1B
PDLIM4	1.60047e-06	0.885477	0.769	0.206	0.0423884		396	SOX13	499.3	ARCHS4 Coexpression,583;Enrichr Queries,1084;ReMap ChIP-seq,60;GTEx Coexpression,270	MFAP5,FST,HOXA3,HOXD11
TGM2	1.6702e-06	0.617162	0.538	0.096	0.0442352		397	TBX6	499.3	ARCHS4 Coexpression,741;Enrichr Queries,726;GTEx Coexpression,31	FABP5,MIR205HG,GPR87,GJB5,CLCA2,TMEM40,DSG3,ADH7,S100A8
CNTN1	1.69784e-06	0.57291	0.308	0.029	0.0449672		398	FOXO1	500	Literature ChIP-seq,116;ARCHS4 Coexpression,1129;Enrichr Queries,573;ReMap ChIP-seq,92;GTEx Coexpression,590	BCL11B,FABP5,HOXA3,DGKH
SCPEP1	1.76957e-06	2.16999	0.923	0.766	0.0468671		399	EN2	500	ARCHS4 Coexpression,772;Enrichr Queries,88;GTEx Coexpression,640	BCL11B,FST,HOXA3,SNAI2
PRMT1	1.81288e-06	0.941988	0.923	0.498	0.0480141		400	TCF7L2	500.8	Literature ChIP-seq,141;ARCHS4 Coexpression,138;ENCODE ChIP-seq,30;Enrichr Queries,1258;ReMap ChIP-seq,35;GTEx Coexpression,1403	SFRP1,BCL11B,PLAU,HOXA3,SSPN,SNAI2,GJB7,HOXD11
CCDC71L	1.88375e-06	0.405614	0.692	0.172	0.0498911		401	HSFX1	501	ARCHS4 Coexpression,680;GTEx Coexpression,322	SSPN
S100A6	1.91811e-06	-2.1501	1	1	0.0508012		402	BHLHE23	501.5	ARCHS4 Coexpression,304;GTEx Coexpression,699	BCL11B
IFITM1	1.92799e-06	1.92964	1	0.78	0.0510629		403	HSFY2	502	ARCHS4 Coexpression,419;GTEx Coexpression,585
ZYX	1.93591e-06	0.342393	0.846	0.273	0.0512725		404	ZBTB42	502	ARCHS4 Coexpression,557;GTEx Coexpression,447
CLIC5	1.95747e-06	-2.12481	0	0.78	0.0518435		405	ZNF594	503	ARCHS4 Coexpression,114;Enrichr Queries,789;GTEx Coexpression,606	PCDHB2
PDCD4	1.98403e-06	0.647371	0.923	0.459	0.0525469		406	LHX5	503.3	ARCHS4 Coexpression,880;Enrichr Queries,191;GTEx Coexpression,439	SFRP1,BCL11B,FST
TMEM70	2.00104e-06	1.37159	0.923	0.502	0.0529975		407	KMT2A	504	ARCHS4 Coexpression,364;ReMap ChIP-seq,53;GTEx Coexpression,1095	CD109,HOXA3,DGKH
ADAM12	2.04156e-06	0.290274	0.308	0.029	0.0540706		408	NOBOX	504.7	ARCHS4 Coexpression,729;Enrichr Queries,109;GTEx Coexpression,676	MMP13,SNAI2,KRT5,ADH7
ACTN1	2.05357e-06	2.15695	0.923	0.474	0.0543888		409	RARA	504.8	Literature ChIP-seq,90;ARCHS4 Coexpression,628;Enrichr Queries,1016;ReMap ChIP-seq,104;GTEx Coexpression,686	GPR87,HOXA3,SNAI2,DSG3,MDFI
BRI3BP	2.05886e-06	0.308264	0.615	0.124	0.0545289		410	ZKSCAN1	504.8	ARCHS4 Coexpression,613;ENCODE ChIP-seq,18;Enrichr Queries,869;ReMap ChIP-seq,230;GTEx Coexpression,794	PKP1
FAM91A1	2.05994e-06	0.423024	0.769	0.225	0.0545576		411	BATF3	505	ARCHS4 Coexpression,274;Enrichr Queries,628;GTEx Coexpression,613	AIM2,PLAU
CLIC6	2.09159e-06	-1.60124	0.077	0.833	0.0553959		412	E2F4	505.5	Literature ChIP-seq,128;ARCHS4 Coexpression,401;ENCODE ChIP-seq,23;Enrichr Queries,823;ReMap ChIP-seq,210;GTEx Coexpression,1448	KRT16,PLAU,MIR205HG,GPR87,SNAI2,KRT6A
PLXDC2	2.11166e-06	0.742849	0.462	0.077	0.0559273		413	ZNF362	506.7	ARCHS4 Coexpression,132;Enrichr Queries,1225;GTEx Coexpression,163	ANO1,SSPN,MDFI
MANEA	2.11479e-06	0.360684	0.538	0.105	0.0560102		414	ZNF697	507.3	ARCHS4 Coexpression,678;Enrichr Queries,599;GTEx Coexpression,245	PLAU,CD109
RPL23	2.14112e-06	1.12137	1	0.981	0.0567075		415	ZNF763	508	ARCHS4 Coexpression,325;Enrichr Queries,916;GTEx Coexpression,283	AIM2,PCDHB2
GLCCI1	2.21729e-06	-1.83412	0.308	0.88	0.0587249		416	CPEB1	508.5	ARCHS4 Coexpression,554;GTEx Coexpression,463
MRPS28	2.25316e-06	0.83035	0.923	0.421	0.0596749		417	JUNB	508.5	ARCHS4 Coexpression,1093;Enrichr Queries,424;ReMap ChIP-seq,145;GTEx Coexpression,372	PLAU,S100A8
SUCLA2	2.31873e-06	0.5691	0.615	0.144	0.0614115		418	ZNF711	508.7	ARCHS4 Coexpression,127;Enrichr Queries,355;GTEx Coexpression,1044	SFRP1,BCL11B,HOXD11
LIMCH1	2.3196e-06	-1.92601	0.462	0.909	0.0614346		419	SIM2	509.3	ARCHS4 Coexpression,1240;Enrichr Queries,258;GTEx Coexpression,30	MIR205HG,FST,TMEM40,KRT5,IGFL1,ADH7,ANO1,SFRP1,FABP5,CLCA2,DSG3,S100A8
ARMC1	2.33027e-06	0.793025	0.769	0.254	0.0617172		420	ZSCAN4	509.3	ARCHS4 Coexpression,1246;Enrichr Queries,204;GTEx Coexpression,78	CASP14,GPR87,KRT14,GJB5,CLCA2,PKP1,ADH7,SERPINB5
NID1	2.34584e-06	0.43485	0.231	0.014	0.0621297		421	HNF1A	509.3	ARCHS4 Coexpression,365;Enrichr Queries,583;GTEx Coexpression,580	GJB7,ADH7
ICAM1	2.3837e-06	-2.09241	0.615	0.962	0.0631322		422	ZNF324B	509.5	ARCHS4 Coexpression,478;GTEx Coexpression,541
PLEC	2.4e-06	1.46255	0.769	0.263	0.0635641		423	PRDM13	510.3	ARCHS4 Coexpression,311;Enrichr Queries,340;GTEx Coexpression,880	BCL11B,HOXD11
KCNK1	2.41489e-06	0.530097	0.385	0.048	0.0639584		424	KLF1	510.6	Literature ChIP-seq,107;ARCHS4 Coexpression,688;Enrichr Queries,703;ReMap ChIP-seq,228;GTEx Coexpression,827	PKP1,S100A8
VEPH1	2.48387e-06	-1.42485	0.077	0.804	0.0657853		425	ETV5	510.7	ARCHS4 Coexpression,314;Enrichr Queries,260;GTEx Coexpression,958	PLAU,FST,SLC1A3
LGALS1	2.56059e-06	1.06773	0.692	0.187	0.0678172		426	PBX1	510.8	Literature ChIP-seq,51;ARCHS4 Coexpression,625;Enrichr Queries,1202;GTEx Coexpression,165	FABP5,GPR87,HOXA3,CLCA2,PKP1,SLC1A3,HOXD11,S100A8
HS6ST1	2.63927e-06	0.38911	0.692	0.187	0.069901		427	BHLHA15	511	ARCHS4 Coexpression,421;GTEx Coexpression,601
TNNI2	2.74001e-06	0.494394	0.231	0.014	0.0725692		428	GATA6	512.2	Literature ChIP-seq,66;ARCHS4 Coexpression,749;Enrichr Queries,134;ReMap ChIP-seq,5;GTEx Coexpression,1607	LGALS7B,ANXA8L1,BCL11B,FST,SLC1A3,BBOX1-AS1,IGFL1,SFRP1,FABP5,PLAU,HOXA3,SSPN,SNAI2,UGT1A6
MIR614	2.79339e-06	-2.20584	0.231	0.842	0.0739828		429	USF2	515.2	ARCHS4 Coexpression,1131;ENCODE ChIP-seq,77;Enrichr Queries,1097;ReMap ChIP-seq,65;GTEx Coexpression,206	PLAU,HOXA3,SSPN,SLC1A3,TMEM40
ZNF880	2.7975e-06	0.337696	0.769	0.206	0.0740918		430	ZFPM2	516	ARCHS4 Coexpression,793;Enrichr Queries,102;GTEx Coexpression,653	SFRP1,FST,SLC1A3,SNAI2
WWC1	2.81904e-06	0.391442	0.538	0.1	0.0746624		431	SPIC	516	ARCHS4 Coexpression,384;Enrichr Queries,290;GTEx Coexpression,874	MMP13,FABP5,ADH7,S100A8
ALDOA	2.96999e-06	1.57065	1	0.976	0.0786601		432	MXD1	516	ARCHS4 Coexpression,205;Enrichr Queries,634;GTEx Coexpression,709	S100A8
NAA15	3.02635e-06	0.850614	0.923	0.344	0.0801528		433	ARID5A	517	ARCHS4 Coexpression,532;GTEx Coexpression,502
PVR	3.06876e-06	0.83469	0.692	0.187	0.0812762		434	ZGPAT	518.3	ARCHS4 Coexpression,434;Enrichr Queries,725;GTEx Coexpression,396	PLAU
SFTA3	3.25017e-06	-2.0779	0.385	0.914	0.0860809		435	HHEX	518.5	ARCHS4 Coexpression,1089;Enrichr Queries,429;ReMap ChIP-seq,149;GTEx Coexpression,407	PLAU,FST,S100A8
TNFRSF1A	3.38874e-06	1.26357	0.846	0.421	0.0897509		436	ZNF425	518.7	ARCHS4 Coexpression,165;Enrichr Queries,648;GTEx Coexpression,743	PODNL1,PLAU
CLIC2	3.50059e-06	-1.15962	0.077	0.789	0.0927131		437	FOXN3	518.7	ARCHS4 Coexpression,321;Enrichr Queries,852;GTEx Coexpression,383	SSPN
FAM89A	3.55988e-06	0.685468	0.385	0.053	0.0942834		438	ETV3	519.3	ARCHS4 Coexpression,691;Enrichr Queries,777;GTEx Coexpression,90	CASP14,GPR87,KRT14,GJB5,PKP1,SERPINB5
EFNA1	3.60619e-06	-2.2599	0.692	0.986	0.0955099		439	POU3F3	520.3	ARCHS4 Coexpression,1260;Enrichr Queries,79;GTEx Coexpression,222	SFRP1,BCL11B,FST,SLC1A3
FDPSP2	3.71854e-06	0.786182	0.538	0.12	0.0984856		440	FLI1	521.2	Literature ChIP-seq,102;ARCHS4 Coexpression,451;ENCODE ChIP-seq,95;Enrichr Queries,1201;ReMap ChIP-seq,121;GTEx Coexpression,1157	PODNL1,KRT17,PLAU,CD109,HOXA3,TMEM40,SLC1A3,SNAI2,GJB7,SERPINB5
TNC	3.81935e-06	0.828521	0.538	0.11	0.101155		441	NFKB2	521.3	ARCHS4 Coexpression,815;Enrichr Queries,602;ReMap ChIP-seq,20;GTEx Coexpression,648	STEAP1B,PLAU,MIR205HG,HOXD11,DGKH
CMTM6	3.92827e-06	0.814348	1	0.517	0.10404		442	AHRR	521.5	ARCHS4 Coexpression,353;GTEx Coexpression,690	CD109
LTBP2	3.9708e-06	0.269947	0.385	0.048	0.105167		443	YY1	521.7	Literature ChIP-seq,16;ARCHS4 Coexpression,930;ENCODE ChIP-seq,50;Enrichr Queries,733;ReMap ChIP-seq,197;GTEx Coexpression,1204	FABP5,GPR87,GJB5,HOXA3,SNAI2,KRT5,S100A7
MBD2	4.07036e-06	0.348059	0.923	0.344	0.107803		444	GLMP	523	ARCHS4 Coexpression,571;GTEx Coexpression,475
SFN	4.10151e-06	1.48592	0.923	0.536	0.108629		445	PPARD	523.5	Literature ChIP-seq,14;ARCHS4 Coexpression,1319;Enrichr Queries,582;GTEx Coexpression,179	PLAU,FST,TMEM40,DSG3,ADH7
BAZ1B	4.13551e-06	-1.73211	0.769	0.947	0.109529		446	KLF6	524.3	ARCHS4 Coexpression,803;Enrichr Queries,574;ReMap ChIP-seq,10;GTEx Coexpression,710	ANO1,KRT17,PLAU,GJB5,HOXA3,SSPN
EPSTI1	4.18837e-06	0.58639	0.769	0.206	0.110929		447	ZNF71	524.7	ARCHS4 Coexpression,361;Enrichr Queries,942;GTEx Coexpression,271	PCDHB2,SSPN
SLC22A31	4.27794e-06	-1.47703	0	0.751	0.113301		448	HOXB13	525	ARCHS4 Coexpression,403;Enrichr Queries,33;ReMap ChIP-seq,82;GTEx Coexpression,1582	ANO1,SFRP1,FST,HOXA3,PKP1,HOXD11
RPL8	4.37437e-06	1.13677	1	1	0.115855		449	RFX5	525	ARCHS4 Coexpression,789;ENCODE ChIP-seq,31;Enrichr Queries,743;ReMap ChIP-seq,202;GTEx Coexpression,860	SFRP1
EEF1A1	4.56487e-06	1.40087	1	1	0.120901		450	HOXB8	525.3	ARCHS4 Coexpression,101;Enrichr Queries,57;GTEx Coexpression,1418	SFRP1,PLAU,FST,HOXA3,HOXD11
C12orf75	4.60064e-06	0.476122	0.385	0.048	0.121848		451	SREBF2	525.5	Literature ChIP-seq,103;ARCHS4 Coexpression,1398;ENCODE ChIP-seq,114;Enrichr Queries,884;ReMap ChIP-seq,137;GTEx Coexpression,517	PODNL1,HOXA3
SH3RF2	4.66433e-06	0.31755	0.462	0.077	0.123535		452	HNF4G	528.6	ARCHS4 Coexpression,651;ENCODE ChIP-seq,112;Enrichr Queries,408;ReMap ChIP-seq,232;GTEx Coexpression,1240	SNAI2,ADH7
EVADR	4.85721e-06	-0.533465	0	0.746	0.128643		453	TBP	528.8	Literature ChIP-seq,135;ARCHS4 Coexpression,1405;ENCODE ChIP-seq,44;ReMap ChIP-seq,201;GTEx Coexpression,859	SFRP1,FST,GJB5
PEG10	4.85721e-06	-1.21936	0	0.746	0.128643		454	MAFK	532.6	ARCHS4 Coexpression,1216;ENCODE ChIP-seq,20;Enrichr Queries,1179;ReMap ChIP-seq,107;GTEx Coexpression,141	ANO1,MMP13,FABP5,PLAU,MIR205HG,HOXA3,SSPN,TMEM40,SNAI2
MYADM	5.04264e-06	0.861351	0.846	0.33	0.133554		455	ZIM3	533.3	ARCHS4 Coexpression,558;Enrichr Queries,426;GTEx Coexpression,616	MMP13,ADH7
ANKRD29	5.0903e-06	-1.21574	0.231	0.823	0.134817		456	PRDM12	534.3	ARCHS4 Coexpression,796;Enrichr Queries,361;GTEx Coexpression,446	SFRP1,BCL11B
PORCN	5.30728e-06	1.62145	0.538	0.129	0.140563		457	ZGLP1	534.5	ARCHS4 Coexpression,149;GTEx Coexpression,920	TMEM40
PDE4C	5.39199e-06	-2.28076	0.077	0.78	0.142807		458	CEBPZ	535.6	ARCHS4 Coexpression,618;ENCODE ChIP-seq,48;Enrichr Queries,905;ReMap ChIP-seq,135;GTEx Coexpression,972	PODNL1
EPPK1	5.46402e-06	0.370565	0.846	0.335	0.144714		459	NFYA	536	ARCHS4 Coexpression,699;ENCODE ChIP-seq,86;Enrichr Queries,1132;ReMap ChIP-seq,140;GTEx Coexpression,623	PODNL1,AIM2
HSD17B12	5.50703e-06	0.528845	1	0.541	0.145854		460	ZNF652	536.3	Literature ChIP-seq,156;ARCHS4 Coexpression,697;Enrichr Queries,1109;GTEx Coexpression,183	CASP14,PKP1
YARS2	5.55762e-06	0.517523	0.692	0.187	0.147194		461	IRF5	536.7	ARCHS4 Coexpression,763;Enrichr Queries,473;GTEx Coexpression,374	AIM2,PLAU,S100A8
TLDC1	5.82273e-06	0.365944	0.692	0.158	0.154215		462	ZBTB33	536.8	ARCHS4 Coexpression,1232;ENCODE ChIP-seq,52;Enrichr Queries,1054;ReMap ChIP-seq,250;GTEx Coexpression,96	ANXA8L1,BCL11B,GPR87,GJB5,PKP1,SERPINB5
ARHGAP23	6.00076e-06	0.37104	0.385	0.053	0.15893		463	SMAD1	537.4	Literature ChIP-seq,144;ARCHS4 Coexpression,178;Enrichr Queries,1273;ReMap ChIP-seq,231;GTEx Coexpression,861	PCDHB2
EIF5A2	6.00076e-06	0.276378	0.385	0.053	0.15893		464	TBX15	537.7	ARCHS4 Coexpression,298;Enrichr Queries,121;GTEx Coexpression,1194	SFRP1,FST,SSPN,SNAI2
TP53BP2	6.09703e-06	-1.72698	0.308	0.88	0.16148		465	ZNF764	537.7	ARCHS4 Coexpression,501;Enrichr Queries,567;GTEx Coexpression,545	PLAU
DPY19L4	6.103e-06	0.454353	0.692	0.215	0.161638		466	ARNT	538.4	Literature ChIP-seq,55;ARCHS4 Coexpression,436;Enrichr Queries,1297;ReMap ChIP-seq,239;GTEx Coexpression,665	ANO1,SLC1A3,KRT5
GAPDH	6.13892e-06	1.49392	1	0.995	0.162589		467	ADNP2	538.7	ARCHS4 Coexpression,578;Enrichr Queries,866;GTEx Coexpression,172	PKP1,SERPINB5
RBM26	6.19229e-06	1.09436	0.923	0.474	0.164003		468	MTF1	539	ARCHS4 Coexpression,643;GTEx Coexpression,435
PPP1R10	6.24882e-06	-1.95182	0.692	0.947	0.1655		469	RFX2	540.8	ARCHS4 Coexpression,292;Enrichr Queries,431;ReMap ChIP-seq,77;GTEx Coexpression,1363	SFRP1,PODNL1,MMP13,SLC1A3,ADH7
AZGP1	6.26214e-06	1.24152	0.154	0.005	0.165853		470	MBD4	542	ARCHS4 Coexpression,1138;ENCODE ChIP-seq,98;Enrichr Queries,1129;ReMap ChIP-seq,80;GTEx Coexpression,265	AIM2,FST,AKR1C2
CDHR1	6.26214e-06	0.266924	0.154	0.005	0.165853		471	PBX4	543	ARCHS4 Coexpression,109;Enrichr Queries,721;GTEx Coexpression,799	BCL11B,TMEM40
EGOT	6.26214e-06	0.351916	0.154	0.005	0.165853		472	DZIP1	543.7	ARCHS4 Coexpression,503;Enrichr Queries,265;GTEx Coexpression,863	SFRP1,FST,SLC1A3
KLHL13	6.26214e-06	0.25101	0.154	0.005	0.165853		473	DLX1	544.7	ARCHS4 Coexpression,189;Enrichr Queries,52;GTEx Coexpression,1393	SFRP1,BCL11B,PCDHB2,FST,SLC1A3,SNAI2
PPP1R14B	6.33992e-06	0.619361	1	0.766	0.167913		474	DMRTA1	545	ARCHS4 Coexpression,202;Enrichr Queries,268;GTEx Coexpression,1165	SFRP1,PCDHB2,FST,SNAI2
SLC7A1	6.51854e-06	0.991625	0.692	0.196	0.172644		475	STAT6	545.5	Literature ChIP-seq,31;ARCHS4 Coexpression,446;Enrichr Queries,1165;GTEx Coexpression,540	BCL11B,CD109
UBR5	6.59422e-06	0.470545	1	0.421	0.174648		476	RHOXF1	546.3	ARCHS4 Coexpression,852;Enrichr Queries,160;GTEx Coexpression,627	MMP13,KRT14,SAA1,ADH7
LAMC2	6.72141e-06	1.21362	0.846	0.325	0.178017		477	E2F3	546.7	ARCHS4 Coexpression,485;Enrichr Queries,557;GTEx Coexpression,598	PLAU
ZG16B	6.95416e-06	0.278524	0.154	0.005	0.184181		478	TET1	547	Literature ChIP-seq,58;ARCHS4 Coexpression,1275;GTEx Coexpression,308	PODNL1,FST,HOXA3,PKP1,HOXD11,MDFI
CAPN1	7.09073e-06	1.11274	1	0.627	0.187798		479	EGR4	549.3	ARCHS4 Coexpression,693;Enrichr Queries,397;GTEx Coexpression,558	BCL11B,FST
RPS16	7.25769e-06	0.836602	1	0.971	0.19222		480	MYCN	551	Literature ChIP-seq,126;ARCHS4 Coexpression,937;Enrichr Queries,229;ReMap ChIP-seq,164;GTEx Coexpression,1299	SFRP1,BCL11B,FST,SNAI2,HOXD11
GRN	7.31609e-06	1.93002	0.923	0.938	0.193767		481	ZNF112	551	ARCHS4 Coexpression,154;GTEx Coexpression,948	PCDHB2
LINC01587	7.71897e-06	0.272893	0.154	0.005	0.204437		482	FOXL1	551.7	ARCHS4 Coexpression,57;Enrichr Queries,154;GTEx Coexpression,1444	SFRP1,PLAU,FST,SNAI2
IFT57	7.88762e-06	-2.12825	0.846	0.976	0.208904		483	HIVEP3	551.7	ARCHS4 Coexpression,444;Enrichr Queries,1177;GTEx Coexpression,34	CASP14,BCL11B,MIR205HG,GPR87,KRT14,GJB5,PKP1,SERPINB5
P2RY6	7.93964e-06	0.683635	0.385	0.053	0.210281		484	KLF3	552.3	ARCHS4 Coexpression,1183;Enrichr Queries,921;ReMap ChIP-seq,47;GTEx Coexpression,58	CASP14,GPR87,GJB5,HOXA3,TMEM40,PKP1,BBOX1-AS1,KRT5,HOXD11,SERPINB5
CTSE	7.99756e-06	-2.45904	0	0.727	0.211815		485	TBXT	554.5	ARCHS4 Coexpression,775;Enrichr Queries,303;ReMap ChIP-seq,49;GTEx Coexpression,1091	SFRP1,BCL11B,FST,SSPN
KRT15	8.06226e-06	0.655525	0.615	0.139	0.213529		486	SP9	555.5	ARCHS4 Coexpression,99;GTEx Coexpression,1012	BCL11B,PCDHB2
OAF	8.13144e-06	0.382233	0.308	0.033	0.215361		487	NR0B1	555.8	Literature ChIP-seq,61;ARCHS4 Coexpression,521;Enrichr Queries,91;GTEx Coexpression,1550	SFRP1,BCL11B,KRT17,FST,GJB5,SNAI2,ADH7
COL4A1	8.22371e-06	0.289876	0.385	0.057	0.217805		488	SPIB	556	ARCHS4 Coexpression,1081;Enrichr Queries,720;ReMap ChIP-seq,45;GTEx Coexpression,378	MFAP5,AIM2,STEAP1B,SSPN,S100A8
AHNAK2	8.45005e-06	1.74973	0.769	0.316	0.2238		489	ZSCAN25	558	ARCHS4 Coexpression,692;GTEx Coexpression,424
EMP2	8.48449e-06	-2.38305	0.923	0.986	0.224712		490	ZBTB7B	558.7	ARCHS4 Coexpression,829;Enrichr Queries,744;GTEx Coexpression,103	CASP14,GPR87,GJB5,PKP1,SERPINB5
VAMP8	8.5724e-06	-1.50749	1	0.976	0.22704		491	RFX3	559	ARCHS4 Coexpression,335;Enrichr Queries,911;GTEx Coexpression,431	PCDHB2
PPP1R13L	8.91741e-06	0.706601	0.769	0.244	0.236178		492	STAT4	561	Literature ChIP-seq,121;ARCHS4 Coexpression,875;Enrichr Queries,436;GTEx Coexpression,812	BCL11B,PLAU,S100A8
CAB39L	9.59123e-06	0.258165	0.308	0.033	0.254024		493	NANOG	563.5	Literature ChIP-seq,8;ARCHS4 Coexpression,1309;ENCODE ChIP-seq,118;Enrichr Queries,449;ReMap ChIP-seq,11;GTEx Coexpression,1486	BCL11B,MIR205HG,FST,GPR87,TMEM40,SLC1A3,HOXD11,ADH7,MFAP5,SFRP1,KRT17,GJB5,HOXA3,SSPN,SAA1,MDFI,DGKH
IFI16	9.59756e-06	1.44604	0.923	0.565	0.254191		494	ZNF583	563.7	ARCHS4 Coexpression,577;Enrichr Queries,537;GTEx Coexpression,577	FST
GDI2	9.80127e-06	0.900873	1	0.617	0.259587		495	IKZF4	564.7	ARCHS4 Coexpression,377;Enrichr Queries,620;GTEx Coexpression,697	BCL11B,PCDHB2
AMFR	9.89704e-06	0.376174	0.769	0.239	0.262123		496	IKZF2	565	ARCHS4 Coexpression,453;Enrichr Queries,707;GTEx Coexpression,535	BCL11B
TAP2	9.91511e-06	0.903276	0.923	0.526	0.262602		497	BHLHE41	565	ARCHS4 Coexpression,102;GTEx Coexpression,1028	SSPN,SLC1A3
RAB11FIP1	9.92917e-06	-1.72858	0.385	0.909	0.262974		498	SETDB1	565.3	Literature ChIP-seq,30;ARCHS4 Coexpression,947;ENCODE ChIP-seq,42;Enrichr Queries,1122;ReMap ChIP-seq,91;GTEx Coexpression,1160	SFRP1,STEAP1B,MMP13,BCL11B,SAA1,SLC1A3,GJB7,TMEM40,HOXD11,MDFI
MS4A15	1.02058e-05	-1.44174	0	0.718	0.270299		499	HOXC5	565.3	ARCHS4 Coexpression,104;Enrichr Queries,16;GTEx Coexpression,1576	ANO1,SFRP1,BCL11B,FST,HOXA3,HOXD11
BRD2	1.03201e-05	-1.79349	0.923	0.971	0.273327		500	E2F7	565.6	Literature ChIP-seq,161;ARCHS4 Coexpression,1124;Enrichr Queries,1010;ReMap ChIP-seq,83;GTEx Coexpression,450	PLAU,HOXA3
CD58	1.06497e-05	0.710553	0.846	0.325	0.282056		501	ZZZ3	566.2	ARCHS4 Coexpression,1601;ENCODE ChIP-seq,115;Enrichr Queries,936;ReMap ChIP-seq,17;GTEx Coexpression,162	STEAP1B,CD109,SNAI2,SERPINB5
NMNAT3	1.07573e-05	0.274937	0.385	0.057	0.284907		502	HEYL	566.7	ARCHS4 Coexpression,43;Enrichr Queries,157;GTEx Coexpression,1500	MFAP5,ANO1,SFRP1,PLAU,SSPN,SNAI2
JUP	1.11421e-05	0.933655	1	0.66	0.295099		503	TCF24	567	ARCHS4 Coexpression,1017;Enrichr Queries,259;GTEx Coexpression,425	ANO1,SFRP1,FST
TRIB2	1.13975e-05	0.327084	0.538	0.11	0.301862		504	RELB	567.5	ARCHS4 Coexpression,617;Enrichr Queries,622;ReMap ChIP-seq,55;GTEx Coexpression,976	STEAP1B,PLAU,HOXD11
TMEM38B	1.14212e-05	0.298932	0.462	0.086	0.302491		505	NKX21	567.5	ARCHS4 Coexpression,231;GTEx Coexpression,904	PCDHB2
MTHFD2	1.14375e-05	1.06387	0.846	0.392	0.302922		506	ASH1L	567.7	ARCHS4 Coexpression,254;Enrichr Queries,990;GTEx Coexpression,459	DGKH
MYO5C	1.16095e-05	-0.895614	0.154	0.766	0.307477		507	SP5	568.3	ARCHS4 Coexpression,1342;Enrichr Queries,257;GTEx Coexpression,106	CASP14,SFRP1,FST,KRT14,GJB5,PKP1,SNAI2,SERPINB5
MAGI3	1.17972e-05	-1.59393	0.462	0.9	0.312448		508	MNT	569.5	ARCHS4 Coexpression,802;Enrichr Queries,926;ReMap ChIP-seq,132;GTEx Coexpression,418	DGKH
WDR66	1.19008e-05	0.881879	0.462	0.096	0.315193		509	TLX3	569.7	ARCHS4 Coexpression,566;Enrichr Queries,175;GTEx Coexpression,968	SFRP1,BCL11B,HOXD11
PJA1	1.19055e-05	0.666407	0.538	0.115	0.315316		510	ZNF491	571.3	ARCHS4 Coexpression,362;Enrichr Queries,663;GTEx Coexpression,689	BCL11B,PCDHB2
PREP	1.19332e-05	0.393299	0.538	0.12	0.316051		511	NEUROD2	571.5	Literature ChIP-seq,73;ARCHS4 Coexpression,950;Enrichr Queries,580;GTEx Coexpression,683	BCL11B,FABP5,PLAU,ANXA8,SERPINB5
TBC1D4	1.21772e-05	0.266963	0.615	0.139	0.322513		512	ZNF737	571.5	ARCHS4 Coexpression,164;GTEx Coexpression,979	PCDHB2
SLC38A1	1.2191e-05	0.834211	1	0.512	0.32288		513	ZBTB32	571.7	ARCHS4 Coexpression,479;Enrichr Queries,700;GTEx Coexpression,536	AIM2
RNASE1	1.22191e-05	-2.67373	0.231	0.885	0.323623		514	ZNF354C	571.7	ARCHS4 Coexpression,184;Enrichr Queries,275;GTEx Coexpression,1256	SFRP1,PCDHB2,FST,SNAI2
ID2	1.23875e-05	-2.48262	0.385	0.9	0.328083		515	ZNF30	572	ARCHS4 Coexpression,208;Enrichr Queries,722;GTEx Coexpression,786	BCL11B,PCDHB2
MRPL14	1.24074e-05	-1.76932	1	0.967	0.328611		516	ZFP42	573	Literature ChIP-seq,94;ARCHS4 Coexpression,226;Enrichr Queries,633;GTEx Coexpression,1339	SFRP1,PCDHB2,HOXD11
TINAGL1	1.2515e-05	1.85855	0.846	0.321	0.331459		517	GFI1	574.3	ARCHS4 Coexpression,493;Enrichr Queries,292;GTEx Coexpression,938	AIM2,BCL11B,S100A8
LPIN2	1.2593e-05	-1.24963	0.154	0.775	0.333525		518	ZMAT4	575.3	ARCHS4 Coexpression,718;Enrichr Queries,352;GTEx Coexpression,656	SFRP1,BCL11B
TMEM132A	1.28016e-05	0.780089	0.615	0.172	0.339051		519	ZNF318	575.8	ARCHS4 Coexpression,406;Enrichr Queries,779;ReMap ChIP-seq,128;GTEx Coexpression,990	STEAP1B
STRN4	1.28895e-05	0.30474	0.846	0.273	0.341379		520	PAX7	577	ARCHS4 Coexpression,111;Enrichr Queries,324;GTEx Coexpression,1296	SFRP1,BCL11B,PCDHB2,MDFI
SLC25A4	1.29764e-05	-1.05662	0	0.708	0.343681		521	IKZF3	577	ARCHS4 Coexpression,171;Enrichr Queries,224;GTEx Coexpression,1336	AIM2,BCL11B,S100A8
GBP2	1.29955e-05	0.401535	0.615	0.153	0.344185		522	POU2F3	578.3	ARCHS4 Coexpression,1545;Enrichr Queries,137;GTEx Coexpression,53	CASP14,ANO1,BCL11B,GPR87,KRT14,GJB5,PKP1,ADH7,SERPINB5
GNAI1	1.301e-05	0.923276	0.615	0.177	0.344571		523	HEY1	578.3	ARCHS4 Coexpression,54;Enrichr Queries,119;GTEx Coexpression,1562	SFRP1,FST,SLC1A3,SNAI2,HOXD11
WDR36	1.33469e-05	0.586415	0.462	0.091	0.353494		524	PLAG1	579.3	ARCHS4 Coexpression,1336;Enrichr Queries,214;GTEx Coexpression,188	SFRP1,PODNL1,STEAP1B,FST,SNAI2
ZFAND1	1.35714e-05	0.568178	0.769	0.273	0.35944		525	CENPA	580	ARCHS4 Coexpression,639;GTEx Coexpression,521
DHRS7	1.39537e-05	0.711474	0.846	0.34	0.369565		526	ZNF703	580	ARCHS4 Coexpression,252;Enrichr Queries,1303;GTEx Coexpression,185	HOXA3,SSPN,HOXD11
FAM3C	1.40125e-05	0.87993	0.769	0.292	0.371122		527	PBX3	580.4	ARCHS4 Coexpression,291;ENCODE ChIP-seq,63;Enrichr Queries,1212;ReMap ChIP-seq,159;GTEx Coexpression,1177	SFRP1,PCDHB2,CD109,BBOX1-AS1
GADD45B	1.41288e-05	-2.41977	0.769	0.947	0.374201		528	TSC22D1	580.7	ARCHS4 Coexpression,210;Enrichr Queries,1274;GTEx Coexpression,258	SLC1A3,TMEM40
ESD	1.41771e-05	0.769952	0.923	0.426	0.375481		529	FOSB	581	ARCHS4 Coexpression,1287;Enrichr Queries,282;GTEx Coexpression,174	PLAU,FST,KRT14,S100A8
ZNF460	1.42412e-05	0.262994	0.615	0.139	0.377179		530	ZNF536	582	ARCHS4 Coexpression,346;Enrichr Queries,274;GTEx Coexpression,1126	SFRP1,BCL11B,PCDHB2,FST
MT2A	1.43165e-05	2.15449	0.923	0.617	0.379171		531	XBP1	582.5	ARCHS4 Coexpression,615;Enrichr Queries,1167;ReMap ChIP-seq,51;GTEx Coexpression,497	CD109,SAA2,MDFI
SCNN1B	1.44033e-05	-1.22625	0.077	0.761	0.381472		532	FOXD4	583	ARCHS4 Coexpression,792;Enrichr Queries,493;GTEx Coexpression,464	FST
FNTA	1.45097e-05	0.929539	1	0.56	0.38429		533	ZSCAN26	583	ARCHS4 Coexpression,239;GTEx Coexpression,927	PCDHB2
ELF3	1.45909e-05	-1.83011	0.385	0.995	0.38644		534	LBX1	583.7	ARCHS4 Coexpression,351;Enrichr Queries,163;GTEx Coexpression,1237	BCL11B,HOXA3,SSPN,HOXD11
MBIP	1.47559e-05	-1.22398	0.462	0.9	0.390811		535	TGIF2	583.8	ARCHS4 Coexpression,708;Enrichr Queries,510;ReMap ChIP-seq,225;GTEx Coexpression,892	PLAU
TPI1	1.48941e-05	1.1478	1	0.967	0.39447		536	FOXC2	584.3	ARCHS4 Coexpression,52;Enrichr Queries,126;GTEx Coexpression,1575	SFRP1,PLAU,FST,CD109,SNAI2
PANK3	1.50604e-05	0.354716	0.538	0.12	0.398874		537	NR1I3	586	ARCHS4 Coexpression,804;Enrichr Queries,432;GTEx Coexpression,522	ADH7,S100A8
MPHOSPH6	1.56854e-05	0.767421	0.769	0.325	0.415428		538	POU3F4	587.3	ARCHS4 Coexpression,307;Enrichr Queries,286;GTEx Coexpression,1169	SFRP1,PCDHB2,FST,SLC1A3
2025-09-11	1.61669e-05	0.349541	0.692	0.201	0.42818		539	GBX2	588.3	Literature ChIP-seq,56;ARCHS4 Coexpression,385;Enrichr Queries,323;GTEx Coexpression,1589	SFRP1,FST,SSPN,MDFI
CEACAM6	1.61927e-05	-2.52025	0.308	0.914	0.428862		540	HES7	589	ARCHS4 Coexpression,469;Enrichr Queries,400;GTEx Coexpression,898	FST,SNAI2
RSRP1	1.6676e-05	-2.11598	0.538	0.928	0.441665		541	TCF23	589.3	ARCHS4 Coexpression,1502;Enrichr Queries,117;GTEx Coexpression,149	MFAP5,ANO1,FST,HOXD11,ADH7,S100A8
RARS2	1.67196e-05	0.74202	0.846	0.373	0.442818		542	ESRRA	589.4	ARCHS4 Coexpression,1141;ENCODE ChIP-seq,106;Enrichr Queries,724;ReMap ChIP-seq,95;GTEx Coexpression,881	ANO1,PLAU,TMEM40
DCAF13	1.68038e-05	1.05016	0.923	0.483	0.44505		543	ETV6	590.3	ARCHS4 Coexpression,555;Enrichr Queries,997;ReMap ChIP-seq,90;GTEx Coexpression,719	SAA1,SAA2
C7orf25	1.68239e-05	0.611794	0.615	0.167	0.445581		544	ZNF467	591	ARCHS4 Coexpression,319;Enrichr Queries,545;GTEx Coexpression,909	S100A8
CNTNAP2	1.71896e-05	0.518	0.308	0.038	0.455266		545	NCOA2	592	ARCHS4 Coexpression,1045;Enrichr Queries,912;ReMap ChIP-seq,56;GTEx Coexpression,355	PLAU,FST,TMEM40
PARD6B	1.74126e-05	-1.1201	0.385	0.952	0.461173		546	ZNF385A	592.3	ARCHS4 Coexpression,1297;Enrichr Queries,456;GTEx Coexpression,24	CASP14,BCL11B,PLAU,MIR205HG,GPR87,KRT14,GJB5,PKP1,KRT5,SERPINB5,S100A8
DLD	1.75691e-05	0.771814	0.846	0.383	0.465318		547	ZXDA	592.7	ARCHS4 Coexpression,410;Enrichr Queries,1044;GTEx Coexpression,324	SSPN
LMO3	1.75879e-05	-1.01872	0.077	0.742	0.465816		548	ETV2	592.8	Literature ChIP-seq,54;ARCHS4 Coexpression,822;Enrichr Queries,230;GTEx Coexpression,1265	AIM2,MMP13,BCL11B,FST,SNAI2
PPHLN1	1.76375e-05	0.952451	1	0.608	0.46713		549	ZNF608	594.7	ARCHS4 Coexpression,312;Enrichr Queries,1350;GTEx Coexpression,122	PCDHB2,GPR87,GJB5,PKP1,SERPINB5
CROT	1.76899e-05	0.32066	0.692	0.191	0.468517		550	ZNF157	594.7	ARCHS4 Coexpression,430;Enrichr Queries,887;GTEx Coexpression,467
SLC44A4	1.77741e-05	-1.59493	0.077	0.722	0.470748		551	ZNF311	594.7	ARCHS4 Coexpression,1607;Enrichr Queries,27;GTEx Coexpression,150	ANO1,SFRP1,PODNL1,BCL11B,FST,SNAI2
XPNPEP1	1.79082e-05	0.45712	0.538	0.129	0.474298		552	HESX1	595.7	ARCHS4 Coexpression,383;Enrichr Queries,467;GTEx Coexpression,937	SFRP1,AIM2,FST
LUZP1	1.83753e-05	0.551323	0.846	0.297	0.48667		553	HLX	596	ARCHS4 Coexpression,825;Enrichr Queries,410;GTEx Coexpression,553	PLAU,S100A8
NDRG1	1.84099e-05	1.13361	0.923	0.55	0.487585		554	ATF6	597	ARCHS4 Coexpression,505;Enrichr Queries,782;GTEx Coexpression,504
TOMM40	1.87871e-05	0.601284	0.846	0.392	0.497577		555	FOXO6	597.3	ARCHS4 Coexpression,887;Enrichr Queries,643;GTEx Coexpression,262	BCL11B,GJB7
CEBPA	1.94643e-05	-1.37396	0.077	0.742	0.515512		556	DBP	597.7	ARCHS4 Coexpression,895;Enrichr Queries,551;GTEx Coexpression,347	BCL11B,S100A8
NRIP1	1.98222e-05	0.975431	0.923	0.407	0.52499		557	BARHL2	598.3	ARCHS4 Coexpression,1055;Enrichr Queries,299;GTEx Coexpression,441	BCL11B,HOXD11
SMIM22	2.00456e-05	-1.25643	0.923	0.923	0.530909		558	ZNF415	598.7	ARCHS4 Coexpression,889;Enrichr Queries,469;GTEx Coexpression,438	SFRP1,SSPN
CPVL	2.08159e-05	0.945103	0.385	0.067	0.551308		559	ZNF197	599.5	ARCHS4 Coexpression,136;Enrichr Queries,1364;ReMap ChIP-seq,25;GTEx Coexpression,873	AIM2,STEAP1B,PCDHB2,GJB5,CLCA2
IRX6	2.15183e-05	0.286785	0.231	0.019	0.569912		560	ATF2	600.4	ARCHS4 Coexpression,1137;ENCODE ChIP-seq,74;Enrichr Queries,974;ReMap ChIP-seq,233;GTEx Coexpression,584	PCDHB2
CLP1	2.21542e-05	0.654819	0.615	0.172	0.586754		561	MYF6	601	ARCHS4 Coexpression,324;Enrichr Queries,362;GTEx Coexpression,1117	MMP13,SSPN,S100A8
PARS2	2.21739e-05	0.252211	0.308	0.038	0.587275		562	SOX1	602.3	ARCHS4 Coexpression,339;Enrichr Queries,170;GTEx Coexpression,1298	SFRP1,BCL11B,PCDHB2,FST
BAK1	2.25338e-05	0.450204	0.769	0.244	0.596808		563	ZNF878	603	ARCHS4 Coexpression,287;GTEx Coexpression,919	FABP5
PRR15L	2.26693e-05	-1.58211	0.154	0.775	0.600396		564	INSM1	604	ARCHS4 Coexpression,911;Enrichr Queries,603;GTEx Coexpression,298	BCL11B,GJB7
PCCA	2.30396e-05	0.647428	0.615	0.177	0.610203		565	ZNF212	604.3	ARCHS4 Coexpression,862;Enrichr Queries,808;GTEx Coexpression,143	GPR87,GJB5,TMEM40
PLA2G10	2.32883e-05	-0.742349	0	0.684	0.616792		566	NR2F1	604.5	ARCHS4 Coexpression,1110;Enrichr Queries,123;ReMap ChIP-seq,160;GTEx Coexpression,1025	SFRP1,PODNL1,FST,SLC1A3,SNAI2
CYSTM1	2.43249e-05	-1.75088	0.846	0.904	0.644244		567	OTP	604.7	ARCHS4 Coexpression,537;Enrichr Queries,78;GTEx Coexpression,1199	BCL11B,FST,HOXA3,HOXD11
SCNN1A	2.44067e-05	-1.1176	0.231	0.9	0.646411		568	ZBTB7A	605.6	ARCHS4 Coexpression,1417;ENCODE ChIP-seq,73;Enrichr Queries,1153;ReMap ChIP-seq,238;GTEx Coexpression,147	FST,GJB5,TMEM40,DSG3
CCT5	2.47631e-05	1.38684	0.923	0.847	0.65585		569	LBX2	605.7	ARCHS4 Coexpression,716;Enrichr Queries,284;GTEx Coexpression,817	PLAU,SNAI2,HOXD11
PRDX5	2.50254e-05	-1.57097	1	0.962	0.662797		570	MXD3	608	ARCHS4 Coexpression,376;Enrichr Queries,659;GTEx Coexpression,789	PLAU,S100A8
MTHFR	2.51018e-05	-1.12154	0.154	0.756	0.664822		571	ZNF177	610.3	ARCHS4 Coexpression,242;Enrichr Queries,529;GTEx Coexpression,1060	PCDHB2,FST
MLLT11	2.57955e-05	0.479908	0.308	0.038	0.683193		572	DMBX1	610.3	ARCHS4 Coexpression,1306;Enrichr Queries,313;GTEx Coexpression,212	BCL11B,GJB7,SNAI2
GATSL2	2.60244e-05	0.779	0.615	0.191	0.689257		573	UNCX	610.7	ARCHS4 Coexpression,1070;Enrichr Queries,309;GTEx Coexpression,453	BCL11B,HOXD11
DEGS2	2.61089e-05	-2.29	0	0.679	0.691493		574	CDX1	611.3	ARCHS4 Coexpression,770;Enrichr Queries,409;GTEx Coexpression,655	SFRP1,HOXA3
CTSH	2.65432e-05	-1.97316	0.769	0.971	0.702998		575	CREB3	613.5	ARCHS4 Coexpression,598;Enrichr Queries,1206;ReMap ChIP-seq,280;GTEx Coexpression,370	GPR87
FAM107B	2.6596e-05	-0.796626	0.077	0.708	0.704395		576	GBX1	614.7	ARCHS4 Coexpression,624;Enrichr Queries,177;GTEx Coexpression,1043	BCL11B,FST,HOXD11
TMTC3	2.68214e-05	0.912122	0.923	0.627	0.710366		577	GATAD2B	615	ARCHS4 Coexpression,589;Enrichr Queries,807;GTEx Coexpression,449
TCEB3	2.69218e-05	-1.49817	0.308	0.785	0.713025		578	FOXI2	615.3	ARCHS4 Coexpression,1308;Enrichr Queries,509;GTEx Coexpression,29	SFRP1,FABP5,GPR87,GJB5,CLCA2,TMEM40,DSG3,IGFL1,ADH7,MDFI
LYNX1	2.71229e-05	1.50225	0.308	0.038	0.718351		579	ZNF639	615.8	ARCHS4 Coexpression,1163;Enrichr Queries,825;ReMap ChIP-seq,278;GTEx Coexpression,197	SSPN
PLTP	2.74845e-05	1.42491	0.615	0.191	0.727927		580	HMG20B	617	ARCHS4 Coexpression,623;Enrichr Queries,898;GTEx Coexpression,330	HOXA3
LRRN4	2.74879e-05	-1.71627	0.077	0.727	0.728018		581	CEBPG	618	ARCHS4 Coexpression,940;Enrichr Queries,525;ReMap ChIP-seq,287;GTEx Coexpression,720	PLAU
FBL	2.74902e-05	0.765566	0.923	0.507	0.728079		582	FOXA3	618.7	ARCHS4 Coexpression,695;Enrichr Queries,461;GTEx Coexpression,700	FST,ADH7
AIM1	2.74926e-05	0.812043	0.769	0.258	0.72814		583	NR1I2	618.8	Literature ChIP-seq,136;ARCHS4 Coexpression,925;Enrichr Queries,638;GTEx Coexpression,776	ADH7
EEF1G	2.76235e-05	1.04128	1	0.995	0.73161		584	ZHX2	620	ARCHS4 Coexpression,917;Enrichr Queries,976;ReMap ChIP-seq,251;GTEx Coexpression,336	SSPN
ETHE1	2.78685e-05	0.68066	0.769	0.278	0.738096		585	ZNF786	620.7	ARCHS4 Coexpression,372;Enrichr Queries,1391;GTEx Coexpression,99	PODNL1,BCL11B,GPR87,GJB5,PKP1,SERPINB5
FRA10AC1	2.78841e-05	0.328672	0.846	0.33	0.738509		586	JUN	620.8	Literature ChIP-seq,40;ARCHS4 Coexpression,1570;ENCODE ChIP-seq,10;Enrichr Queries,566;ReMap ChIP-seq,116;GTEx Coexpression,1423	ANXA8L1,AIM2,MMP13,KRT17,PLAU,CD109,GPR87,SNAI2,DSG3
MYO19	2.80499e-05	0.86193	0.615	0.158	0.742901		587	ZNF134	621	ARCHS4 Coexpression,151;Enrichr Queries,1214;GTEx Coexpression,498	PCDHB2
BZW2	2.82617e-05	0.711122	1	0.598	0.748512		588	DMRT2	621.7	ARCHS4 Coexpression,443;Enrichr Queries,139;GTEx Coexpression,1283	SFRP1,BCL11B,FST,ADH7
CARD10	2.85152e-05	0.326366	0.308	0.038	0.755225		589	TIGD7	622.7	ARCHS4 Coexpression,129;Enrichr Queries,1389;GTEx Coexpression,350	PCDHB2,SSPN
IL12RB2	2.85152e-05	0.275127	0.308	0.038	0.755225		590	NKX61	623.5	ARCHS4 Coexpression,920;GTEx Coexpression,327	HOXA3
ADPRM	2.86634e-05	0.365892	0.385	0.062	0.759151		591	SHOX	624.3	ARCHS4 Coexpression,1212;Enrichr Queries,367;GTEx Coexpression,294	FST,HOXA3,HOXD11
CBLC	2.89033e-05	0.315659	0.462	0.086	0.765503		592	ZNF101	624.7	ARCHS4 Coexpression,1062;Enrichr Queries,487;GTEx Coexpression,325	AIM2,BCL11B
KIAA0040	2.92622e-05	0.68928	0.692	0.211	0.77501		593	LHX8	625.7	ARCHS4 Coexpression,173;Enrichr Queries,217;GTEx Coexpression,1487	SFRP1,BCL11B,PCDHB2,FST
PGAM1	2.95739e-05	0.949252	0.923	0.641	0.783264		594	NPAS4	626.7	ARCHS4 Coexpression,879;Enrichr Queries,402;GTEx Coexpression,599	BCL11B,FST
CTNNB1	2.97823e-05	0.476205	1	0.737	0.788785		595	TBX21	626.8	ARCHS4 Coexpression,1263;Enrichr Queries,293;ReMap ChIP-seq,168;GTEx Coexpression,783	AIM2,BCL11B,S100A8
DDAH1	2.9991e-05	-0.980805	0.154	0.766	0.794313		596	ZNF623	627.3	ARCHS4 Coexpression,724;Enrichr Queries,1003;GTEx Coexpression,155	CD109,SNAI2
MIA3	3.01558e-05	-1.33991	0.615	0.914	0.798677		597	GATA4	627.4	Literature ChIP-seq,65;ARCHS4 Coexpression,1609;Enrichr Queries,220;ReMap ChIP-seq,105;GTEx Coexpression,1138	LGALS7B,SFRP1,FABP5,BCL11B,FST,SLC1A3,IGFL1,HOXD11,UGT1A6
ALDH16A1	3.02289e-05	0.337724	0.692	0.187	0.800612		598	NFIA	627.7	ARCHS4 Coexpression,76;Enrichr Queries,562;GTEx Coexpression,1245	BCL11B,SLC1A3
RAP2A	3.02893e-05	0.397432	0.615	0.163	0.802213		599	HMX2	628.7	ARCHS4 Coexpression,908;Enrichr Queries,72;GTEx Coexpression,906	SFRP1,BCL11B,HOXA3,HOXD11
RPS27	3.10644e-05	-1.33764	1	0.995	0.82274		600	PRDM2	629	ARCHS4 Coexpression,542;Enrichr Queries,903;GTEx Coexpression,442
RDH13	3.16948e-05	0.358824	0.615	0.153	0.839437		601	INSM2	629.3	ARCHS4 Coexpression,611;Enrichr Queries,666;GTEx Coexpression,611	BCL11B
MAFB	3.1981e-05	1.79944	0.615	0.172	0.847018		602	HNF1B	629.3	ARCHS4 Coexpression,546;Enrichr Queries,1333;ReMap ChIP-seq,9	MMP13,PLAU,CD109,HOXA3,SSPN,IGFL1
GLIPR1	3.24396e-05	0.271533	0.385	0.062	0.859163		603	OTX2	630.5	ARCHS4 Coexpression,1321;Enrichr Queries,178;ReMap ChIP-seq,81;GTEx Coexpression,942	SFRP1,BCL11B,GPR87,FST,BBOX1-AS1
ZNF250	3.25916e-05	0.756786	0.538	0.129	0.863189		604	DNTTIP1	631	ARCHS4 Coexpression,794;GTEx Coexpression,468
SDR42E1	3.31112e-05	0.276143	0.308	0.038	0.876949		605	ARID3C	631.5	ARCHS4 Coexpression,787;GTEx Coexpression,476
IL15RA	3.33138e-05	0.442128	0.538	0.124	0.882316		606	SOHLH1	633.7	ARCHS4 Coexpression,234;Enrichr Queries,158;GTEx Coexpression,1509	AIM2,KRT17,FST,KRT14,ADH7
SOD3	3.35171e-05	-1.28192	0.077	0.727	0.8877		607	ZNF541	634.3	ARCHS4 Coexpression,921;Enrichr Queries,412;GTEx Coexpression,570	SFRP1,ADH7
HDLBP	3.48472e-05	-1.29397	0.769	0.952	0.922928		608	TFEB	634.5	Literature ChIP-seq,97;ARCHS4 Coexpression,890;Enrichr Queries,1186;GTEx Coexpression,365	AIM2,HOXD11
SAE1	3.4888e-05	0.585747	0.846	0.373	0.924009		609	ZNF117	635.3	ARCHS4 Coexpression,306;Enrichr Queries,1384;GTEx Coexpression,216	PCDHB2,MDFI
SPECC1	3.54329e-05	0.297571	0.462	0.091	0.93844		610	LHX6	635.3	ARCHS4 Coexpression,320;Enrichr Queries,227;GTEx Coexpression,1359	SFRP1,BCL11B,PCDHB2,FST
CAPN2	3.55872e-05	-1.74033	1	0.971	0.942527		611	ZNF281	635.3	ARCHS4 Coexpression,244;Enrichr Queries,1296;GTEx Coexpression,366	SFRP1,STEAP1B
RPS11	3.55933e-05	1.0348	1	0.995	0.94269		612	CREBZF	635.7	ARCHS4 Coexpression,534;Enrichr Queries,755;GTEx Coexpression,618
PRCP	3.56226e-05	0.63165	0.692	0.22	0.943465		613	FOXP3	636.8	Literature ChIP-seq,123;ARCHS4 Coexpression,1027;Enrichr Queries,475;GTEx Coexpression,922	AIM2,BCL11B,S100A8
TDP1	3.65981e-05	0.40524	0.538	0.124	0.9693		614	GTF2I	637	ARCHS4 Coexpression,637
SLC44A1	3.70801e-05	0.655136	0.846	0.392	0.982065		615	ZNF792	638	ARCHS4 Coexpression,249;Enrichr Queries,421;GTEx Coexpression,1244	BCL11B,PLAU,TMEM40
ATPIF1	3.80557e-05	-1.4035	0.923	0.957	1		616	ZNF709	638.3	ARCHS4 Coexpression,188;Enrichr Queries,719;GTEx Coexpression,1008	BCL11B,PCDHB2
PRKCZ	3.82383e-05	-1.20602	0.077	0.703	1		617	FEZF2	638.3	ARCHS4 Coexpression,246;Enrichr Queries,322;GTEx Coexpression,1347	SFRP1,BCL11B,MDFI
STT3A	3.82883e-05	0.838239	0.923	0.435	1		618	ELK4	638.4	ARCHS4 Coexpression,1145;ENCODE ChIP-seq,79;Enrichr Queries,822;ReMap ChIP-seq,262;GTEx Coexpression,884	PODNL1
PTPRK	3.83034e-05	0.959233	0.846	0.431	1		619	ZSCAN16	639	ARCHS4 Coexpression,152;Enrichr Queries,1379;GTEx Coexpression,386	AIM2,PCDHB2
THBS2	3.84053e-05	0.311083	0.308	0.038	1		620	ST18	639.3	ARCHS4 Coexpression,840;Enrichr Queries,641;GTEx Coexpression,437	BCL11B
CAP2	3.88115e-05	0.274916	0.615	0.153	1		621	CCDC17	639.5	ARCHS4 Coexpression,349;GTEx Coexpression,930	ADH7
ICAM4	3.89968e-05	-1.52283	0.231	0.77	1		622	TFDP1	640.5	ARCHS4 Coexpression,491;Enrichr Queries,908;ReMap ChIP-seq,263;GTEx Coexpression,900
PPP2R4	3.92933e-05	0.387253	0.846	0.368	1		623	RXRG	642	ARCHS4 Coexpression,795;Enrichr Queries,391;GTEx Coexpression,740	SFRP1,FST
ADIRF	3.94867e-05	-0.988221	0.231	0.756	1		624	ESR2	644.8	Literature ChIP-seq,32;ARCHS4 Coexpression,1396;Enrichr Queries,403;ReMap ChIP-seq,42;GTEx Coexpression,1351	PLAU,FST,HOXA3,SNAI2,AKR1C2,IGFL1,HOXD11
PML	3.97716e-05	0.432034	0.923	0.373	1		625	NFKB1	645	ARCHS4 Coexpression,896;Enrichr Queries,655;ReMap ChIP-seq,219;GTEx Coexpression,810	PLAU
RAB25	4.01156e-05	-2.44425	0.462	0.866	1		626	ZNF821	645	ARCHS4 Coexpression,296;Enrichr Queries,786;GTEx Coexpression,853	PCDHB2
IPO4	4.02495e-05	0.781636	0.615	0.187	1		627	ZNF300	645.3	ARCHS4 Coexpression,207;Enrichr Queries,247;GTEx Coexpression,1482	SFRP1,PCDHB2,PLAU,FST
HBEGF	4.02557e-05	-2.24193	0.308	0.842	1		628	POU4F1	645.3	ARCHS4 Coexpression,456;Enrichr Queries,334;GTEx Coexpression,1146	SFRP1,BCL11B
XPOT	4.09361e-05	0.250018	0.692	0.191	1		629	FOXE3	645.7	ARCHS4 Coexpression,342;Enrichr Queries,295;GTEx Coexpression,1300	BCL11B,HOXD11
TMED10	4.10157e-05	1.18502	1	0.837	1		630	JUND	646.5	Literature ChIP-seq,41;ARCHS4 Coexpression,1130;ENCODE ChIP-seq,1;Enrichr Queries,1249;ReMap ChIP-seq,173;GTEx Coexpression,1285	ANXA8L1,GPR87,SLC1A3,TMEM40,SFRP1,MMP13,KRT17,PLAU,KRT16,CD109,GJB5,SNAI2,DSG3,UGT1A6
LAMB1	4.17693e-05	0.594473	0.538	0.134	1		631	ZNF165	646.8	ARCHS4 Coexpression,256;Enrichr Queries,640;ReMap ChIP-seq,292;GTEx Coexpression,1399	PLAU,ANXA8
TMEM168	4.19666e-05	0.49718	0.769	0.292	1		632	FOXK1	647.5	ARCHS4 Coexpression,962;Enrichr Queries,736;ReMap ChIP-seq,85;GTEx Coexpression,807	HOXA3,BBOX1-AS1
GRWD1	4.22898e-05	0.598825	0.769	0.268	1		633	ZNF84	648	ARCHS4 Coexpression,209;Enrichr Queries,523;GTEx Coexpression,1212	BCL11B,PCDHB2
APOL2	4.24003e-05	1.58906	1	0.751	1		634	POU2F1	648.3	ARCHS4 Coexpression,897;Enrichr Queries,984;ReMap ChIP-seq,163;GTEx Coexpression,549	PCDHB2
ASPH	4.25296e-05	0.841335	1	0.545	1		635	ZNF16	648.3	ARCHS4 Coexpression,928;Enrichr Queries,368;GTEx Coexpression,649	PLAU,SNAI2
NME2	4.35152e-05	0.448386	1	0.708	1		636	ZNF253	648.3	ARCHS4 Coexpression,139;Enrichr Queries,836;GTEx Coexpression,970	PCDHB2
C1R	4.37336e-05	3.09058	0.846	0.612	1		637	HMGN3	649	ARCHS4 Coexpression,893;ENCODE ChIP-seq,82;ReMap ChIP-seq,257;GTEx Coexpression,1364	FABP5
C1orf198	4.40339e-05	-1.38179	0.385	0.866	1		638	NFATC4	650	ARCHS4 Coexpression,201;Enrichr Queries,434;GTEx Coexpression,1315	SFRP1,FST,MDFI
GSTM3	4.43281e-05	-2.42616	0.462	0.833	1		639	ZNF25	650	ARCHS4 Coexpression,702;Enrichr Queries,535;GTEx Coexpression,713	SNAI2
PPP1CB	4.44682e-05	1.31086	1	0.895	1		640	PAX8	650.5	ARCHS4 Coexpression,1061;Enrichr Queries,683;ReMap ChIP-seq,100;GTEx Coexpression,758	BCL11B,PLAU,CD109
RPL4	4.48373e-05	0.96479	1	0.967	1		641	PLAGL2	652.3	ARCHS4 Coexpression,602;Enrichr Queries,746;GTEx Coexpression,609
CCDC109B	4.51756e-05	0.898018	0.308	0.043	1		642	ZNF2	653	ARCHS4 Coexpression,411;Enrichr Queries,895
EI24	4.52169e-05	1.29925	0.923	0.694	1		643	ZNF57	653	ARCHS4 Coexpression,1377;Enrichr Queries,498;GTEx Coexpression,84	CASP14,GPR87,KRT14,GJB5,PKP1,SNAI2,SERPINB5
MFSD4	4.56479e-05	-1.00826	0	0.656	1		644	SREBF1	653.7	Literature ChIP-seq,138;ARCHS4 Coexpression,899;ENCODE ChIP-seq,32;Enrichr Queries,1170;ReMap ChIP-seq,240;GTEx Coexpression,1443	PODNL1
PFN2	4.58291e-05	1.73642	0.923	0.627	1		645	ZNF846	655.3	ARCHS4 Coexpression,392;Enrichr Queries,1081;GTEx Coexpression,493
GNA13	4.65095e-05	0.261881	0.385	0.067	1		646	ZNF213	656.3	ARCHS4 Coexpression,425;Enrichr Queries,876;GTEx Coexpression,668
VPS26A	4.72625e-05	0.28726	0.923	0.364	1		647	JDP2	656.7	ARCHS4 Coexpression,817;Enrichr Queries,592;GTEx Coexpression,561	PLAU
DNM3	4.73142e-05	0.308122	0.462	0.1	1		648	POU5F1B	657.5	ARCHS4 Coexpression,285;GTEx Coexpression,1030	SFRP1
HACD2	4.8127e-05	0.683078	0.615	0.206	1		649	FOXL2	658.3	ARCHS4 Coexpression,461;Enrichr Queries,30;GTEx Coexpression,1484	SFRP1,PLAU,FST,SNAI2,HOXD11
HNRNPC	4.92373e-05	0.929378	1	0.933	1		650	XPA	659.3	ARCHS4 Coexpression,605;Enrichr Queries,1067;GTEx Coexpression,306	SSPN
USB1	4.94464e-05	0.773072	0.923	0.474	1		651	ZNF569	660	ARCHS4 Coexpression,130;Enrichr Queries,540;GTEx Coexpression,1310	PCDHB2,SSPN
FAM126A	5.15085e-05	0.797749	0.538	0.148	1		652	NEUROG3	661.7	ARCHS4 Coexpression,396;Enrichr Queries,212;GTEx Coexpression,1377	SFRP1,BCL11B,ADH7
PPP2R1A	5.27307e-05	1.13156	0.923	0.718	1		653	THAP1	662.8	ARCHS4 Coexpression,867;ENCODE ChIP-seq,70;Enrichr Queries,1285;ReMap ChIP-seq,277;GTEx Coexpression,815	PODNL1
ACTG1	5.32353e-05	1.97211	1	0.971	1		654	AR	665.2	Literature ChIP-seq,39;ARCHS4 Coexpression,1472;Enrichr Queries,328;ReMap ChIP-seq,96;GTEx Coexpression,1391	BCL11B,FST,GPR87,SLC1A3,AKR1C2,ADH7,HOXD11,ANO1,SFRP1,FABP5,HOXA3,PKP1,SNAI2
FAR1	5.40291e-05	0.30382	0.769	0.258	1		655	PBX2	665.3	ARCHS4 Coexpression,635;Enrichr Queries,847;ReMap ChIP-seq,187;GTEx Coexpression,992	PLAU
IL7	5.42092e-05	0.287804	0.462	0.096	1		656	ZNF496	665.7	ARCHS4 Coexpression,906;Enrichr Queries,819;GTEx Coexpression,272	BCL11B
SCARB1	5.43979e-05	0.340282	0.538	0.139	1		657	ATF1	666.4	ARCHS4 Coexpression,1345;ENCODE ChIP-seq,96;Enrichr Queries,784;ReMap ChIP-seq,253;GTEx Coexpression,854
LHFP	5.44784e-05	0.331342	0.308	0.043	1		658	ZNF534	667	ARCHS4 Coexpression,513;GTEx Coexpression,821
WWC2	5.55024e-05	-0.974408	0.154	0.718	1		659	NEUROG2	667	ARCHS4 Coexpression,1102;Enrichr Queries,181;GTEx Coexpression,718	SFRP1,BCL11B,FST
PCNA	5.69891e-05	0.931762	1	0.617	1		660	TRAFD1	667	ARCHS4 Coexpression,399;Enrichr Queries,960;GTEx Coexpression,642
EDF1	5.74198e-05	-1.12943	1	0.967	1		661	ZNF334	667.7	ARCHS4 Coexpression,144;Enrichr Queries,624;GTEx Coexpression,1235	SFRP1,PCDHB2
COL16A1	5.77032e-05	0.604466	0.538	0.139	1		662	ZNF568	667.7	ARCHS4 Coexpression,474;Enrichr Queries,1045;GTEx Coexpression,484
FBLN5	5.79604e-05	-1.54679	0.154	0.77	1		663	ZNF287	668	ARCHS4 Coexpression,206;Enrichr Queries,590;GTEx Coexpression,1208	PCDHB2,CD109
BICD2	5.81346e-05	0.447689	0.692	0.215	1		664	ATOH7	668	ARCHS4 Coexpression,548;Enrichr Queries,522;GTEx Coexpression,934	BCL11B
TFIP11	5.8342e-05	0.721122	0.846	0.311	1		665	ATF7	668.8	ARCHS4 Coexpression,227;Enrichr Queries,966;ReMap ChIP-seq,249;GTEx Coexpression,1233	SSPN
SRD5A1	5.84921e-05	0.405896	0.615	0.187	1		666	NR2F6	669	ARCHS4 Coexpression,740;Enrichr Queries,1020;ReMap ChIP-seq,147;GTEx Coexpression,769	FST
CREB3L1	5.92378e-05	-0.726966	0.077	0.675	1		667	TBX1	669.7	ARCHS4 Coexpression,905;Enrichr Queries,98;GTEx Coexpression,1006	SFRP1,BCL11B,FST,SNAI2
PTBP1	5.93208e-05	0.735512	1	0.775	1		668	ZNF841	670.3	ARCHS4 Coexpression,177;Enrichr Queries,581;GTEx Coexpression,1253	CD109,DGKH
JUN	6.07799e-05	-1.62355	0.846	0.995	1		669	REST	670.5	Literature ChIP-seq,98;ARCHS4 Coexpression,1620;ENCODE ChIP-seq,33;Enrichr Queries,1288;ReMap ChIP-seq,180;GTEx Coexpression,804	KRT17,BCL11B,KRT14,GJB5,PKP1,IGFL1
TCEA3	6.25294e-05	-1.09115	0.231	0.789	1		670	THAP7	670.7	ARCHS4 Coexpression,569;Enrichr Queries,846;GTEx Coexpression,597
RPS5	6.3097e-05	0.935679	1	0.967	1		671	SIX5	671	ARCHS4 Coexpression,336;ENCODE ChIP-seq,91;Enrichr Queries,1259;ReMap ChIP-seq,245;GTEx Coexpression,1424	MDFI
VSIG2	6.31816e-05	-1.51443	0	0.641	1		672	DPF3	671.3	ARCHS4 Coexpression,316;Enrichr Queries,385;GTEx Coexpression,1313	BCL11B,SLC1A3
HIAT1	6.47603e-05	0.837775	0.692	0.254	1		673	PROX2	672	ARCHS4 Coexpression,229;Enrichr Queries,459;GTEx Coexpression,1328	PODNL1,BCL11B,ADH7
MEST	6.47603e-05	0.692091	0.692	0.254	1		674	BORCS8MEF2B	674	ARCHS4 Coexpression,674
TRIM14	6.48259e-05	0.351978	0.769	0.273	1		675	ZNF391	674.3	ARCHS4 Coexpression,1243;Enrichr Queries,382;GTEx Coexpression,398	PLAU,SSPN
BMPR1B	6.55771e-05	0.347015	0.308	0.043	1		676	HDX	674.7	ARCHS4 Coexpression,119;Enrichr Queries,454;GTEx Coexpression,1451	PCDHB2,FST,SLC1A3
FAM110C	6.55771e-05	0.305207	0.308	0.043	1		677	LTF	675	ARCHS4 Coexpression,340;GTEx Coexpression,1010	S100A8
VKORC1L1	6.70783e-05	-1.16065	0.385	0.871	1		678	PURB	675	ARCHS4 Coexpression,525;GTEx Coexpression,825
MYEOV2	6.80387e-05	-1.53433	0.615	0.885	1		679	ZNF592	675.5	ARCHS4 Coexpression,514;Enrichr Queries,938;ReMap ChIP-seq,70;GTEx Coexpression,1180	ANO1
MINA	6.82181e-05	0.275855	0.615	0.163	1		680	ZBED5	676.5	ARCHS4 Coexpression,515;GTEx Coexpression,838
ENTPD7	6.96224e-05	0.496306	0.462	0.105	1		681	PLSCR1	677	ARCHS4 Coexpression,790;GTEx Coexpression,564
TUBGCP5	6.99373e-05	0.499719	0.692	0.23	1		682	FOXO3	677.5	Literature ChIP-seq,95;ARCHS4 Coexpression,671;Enrichr Queries,1136;GTEx Coexpression,808	HOXA3
KIAA1683	7.02953e-05	-1.59913	0	0.636	1		683	NKX24	677.5	ARCHS4 Coexpression,332;GTEx Coexpression,1023	HOXD11
C19orf48	7.05908e-05	1.35486	0.769	0.421	1		684	GLI2	678	ARCHS4 Coexpression,293;Enrichr Queries,321;GTEx Coexpression,1420	SFRP1,FST
TAP1	7.08779e-05	2.0588	1	0.737	1		685	ZNF598	678.3	ARCHS4 Coexpression,752;Enrichr Queries,965;GTEx Coexpression,318	PKP1
FZD6	7.10526e-05	0.60746	0.769	0.292	1		686	GLYR1	678.7	ARCHS4 Coexpression,1003;ReMap ChIP-seq,279;GTEx Coexpression,754
MYLK	7.13876e-05	0.476521	0.385	0.067	1		687	NR1H4	678.7	ARCHS4 Coexpression,768;Enrichr Queries,564;GTEx Coexpression,704	ADH7
POMP	7.14082e-05	0.647653	1	0.718	1		688	GABPA	678.8	Literature ChIP-seq,87;ARCHS4 Coexpression,1000;ENCODE ChIP-seq,66;Enrichr Queries,1112;ReMap ChIP-seq,207;GTEx Coexpression,1601	STEAP1B,SSPN,ADH7
C4BPB	7.19792e-05	-1.62745	0.231	0.77	1		689	AIRE	679	ARCHS4 Coexpression,264;Enrichr Queries,338;GTEx Coexpression,1435	AIM2,PLAU,S100A8
GABRP	7.20508e-05	0.768508	0.231	0.024	1		690	ASCL5	680	ARCHS4 Coexpression,902;GTEx Coexpression,458
TP53I11	7.20515e-05	-1.68785	0.769	0.909	1		691	ZFP90	680	ARCHS4 Coexpression,176;Enrichr Queries,658;GTEx Coexpression,1206	PCDHB2,PLAU
PLXNA2	7.23397e-05	-1.46203	0.308	0.828	1		692	TCF4	680.4	Literature ChIP-seq,7;ARCHS4 Coexpression,1090;Enrichr Queries,1032;ReMap ChIP-seq,24;GTEx Coexpression,1249	AIM2,GJB5,HOXA3,SSPN,PKP1,UGT1A6
UTRN	7.28539e-05	-0.920109	0.308	0.756	1		693	LHX9	681	ARCHS4 Coexpression,270;Enrichr Queries,250;GTEx Coexpression,1523	SFRP1,BCL11B,PCDHB2,FST
STEAP1	7.3425e-05	0.535351	0.692	0.23	1		694	FOXJ2	681.5	ARCHS4 Coexpression,1292;Enrichr Queries,995;ReMap ChIP-seq,71;GTEx Coexpression,368	SSPN,CLCA2,UGT1A6
COL4A2	7.40119e-05	0.468723	0.538	0.144	1		695	RFX1	683.8	ARCHS4 Coexpression,535;Enrichr Queries,849;ReMap ChIP-seq,248;GTEx Coexpression,1103
ERAP2	7.42161e-05	0.472575	0.692	0.263	1		696	ARNT2	684	ARCHS4 Coexpression,1447;Enrichr Queries,223;GTEx Coexpression,382	SFRP1,FST,SLC1A3
POLR1D	7.48126e-05	0.612003	0.846	0.455	1		697	ZFX	684.2	Literature ChIP-seq,127;ARCHS4 Coexpression,1597;Enrichr Queries,731;ReMap ChIP-seq,252;GTEx Coexpression,714	SSPN
RARRES1	7.63341e-05	3.94761	0.231	0.024	1		698	SIX4	684.3	ARCHS4 Coexpression,667;Enrichr Queries,128;GTEx Coexpression,1258	SFRP1,PLAU,FST,SNAI2
SPTBN1	7.74042e-05	-1.61955	0.923	0.943	1		699	LHX4	684.7	ARCHS4 Coexpression,1135;Enrichr Queries,570;GTEx Coexpression,349	AIM2,BCL11B
PLEKHF2	7.74574e-05	0.684139	0.692	0.22	1		700	ISX	684.7	ARCHS4 Coexpression,901;Enrichr Queries,723;GTEx Coexpression,430	ADH7
CCND2	7.78496e-05	0.688655	0.462	0.1	1		701	FOXD4L5	685.3	ARCHS4 Coexpression,455;Enrichr Queries,1399;GTEx Coexpression,202	AKR1C2
ADGRD1	7.81457e-05	-0.599154	0	0.632	1		702	ZNF708	685.3	ARCHS4 Coexpression,143;Enrichr Queries,1215;GTEx Coexpression,698	PCDHB2
ALDH18A1	7.83763e-05	0.356913	0.692	0.215	1		703	CHCHD3	687.5	ARCHS4 Coexpression,771;GTEx Coexpression,604
PAK1IP1	7.86169e-05	0.82261	0.846	0.464	1		704	ZNF138	688	ARCHS4 Coexpression,145;Enrichr Queries,1234;GTEx Coexpression,685	PCDHB2
SELT	7.86531e-05	0.914467	1	0.794	1		705	PLAGL1	688	ARCHS4 Coexpression,636;Enrichr Queries,381;GTEx Coexpression,1047	SFRP1,FST
ACTN4	7.88571e-05	1.05766	1	0.938	1		706	UBP1	688	ARCHS4 Coexpression,683;Enrichr Queries,925;GTEx Coexpression,456
CUL4A	7.88601e-05	0.803588	0.769	0.373	1		707	TIGD4	688.3	ARCHS4 Coexpression,120;Enrichr Queries,345;GTEx Coexpression,1600	PCDHB2,FST,ADH7
PUF60	8.13803e-05	1.01721	1	0.742	1		708	FOXB1	689	ARCHS4 Coexpression,828;Enrichr Queries,28;GTEx Coexpression,1211	SFRP1,BCL11B,FST,HOXA3,HOXD11
GSTO1	8.18871e-05	0.714476	0.923	0.45	1		709	PRDM9	689.3	ARCHS4 Coexpression,213;Enrichr Queries,684;GTEx Coexpression,1171	ADH7,HOXD11
RMDN1	8.23648e-05	0.626531	0.846	0.426	1		710	VEZF1	689.3	ARCHS4 Coexpression,957;Enrichr Queries,768;GTEx Coexpression,343	SSPN
RAB7B	8.30002e-05	0.597296	0.385	0.077	1		711	ZBTB46	690.7	ARCHS4 Coexpression,395;Enrichr Queries,661;GTEx Coexpression,1016	PLAU
MTDH	8.46352e-05	0.940751	0.923	0.914	1		712	ZSCAN5C	690.7	ARCHS4 Coexpression,854;Enrichr Queries,812;GTEx Coexpression,406
SERINC2	8.49332e-05	1.5664	0.923	0.842	1		713	SNAI3	691.3	ARCHS4 Coexpression,407;Enrichr Queries,1121;GTEx Coexpression,546
COL23A1	8.56332e-05	0.272446	0.231	0.024	1		714	ZNF483	691.7	ARCHS4 Coexpression,540;Enrichr Queries,890;GTEx Coexpression,645
TM9SF2	8.75647e-05	1.48757	1	0.789	1		715	FOXH1	692	ARCHS4 Coexpression,313;Enrichr Queries,676;GTEx Coexpression,1087	SFRP1,FST
ZDHHC13	8.88724e-05	0.365355	0.615	0.187	1		716	ZNF248	692	ARCHS4 Coexpression,258;Enrichr Queries,1250;GTEx Coexpression,568	PCDHB2
PLSCR1	8.93984e-05	1.17606	1	0.67	1		717	TFE3	692.7	ARCHS4 Coexpression,524;Enrichr Queries,704;GTEx Coexpression,850	PLAU
FILIP1L	9.00763e-05	0.304849	0.385	0.072	1		718	SP100	692.7	ARCHS4 Coexpression,1144;Enrichr Queries,444;GTEx Coexpression,490	AIM2,PLAU
CARD6	9.00881e-05	0.611313	0.462	0.105	1		719	CSRNP1	695	ARCHS4 Coexpression,413;GTEx Coexpression,977
DEPDC7	9.00881e-05	0.611911	0.462	0.105	1		720	ZNF74	695	ARCHS4 Coexpression,276;Enrichr Queries,611;GTEx Coexpression,1198	BCL11B,PCDHB2
PATL1	9.1972e-05	0.571993	0.846	0.349	1		721	SMAD9	695	ARCHS4 Coexpression,1152;Enrichr Queries,200;GTEx Coexpression,733	SFRP1,FST,SNAI2
LEMD2	9.2495e-05	0.420794	0.769	0.258	1		722	GSC2	695	ARCHS4 Coexpression,588;Enrichr Queries,480;GTEx Coexpression,1017	HOXD11
ABCC6	9.34523e-05	-1.10961	0.154	0.699	1		723	HMX1	695.3	ARCHS4 Coexpression,225;Enrichr Queries,296;GTEx Coexpression,1565	BCL11B,HOXD11
LIN7C	9.43512e-05	1.05607	0.846	0.545	1		724	NANOGP8	695.5	ARCHS4 Coexpression,676;GTEx Coexpression,715
LOC100996251	9.44999e-05	0.686188	0.308	0.043	1		725	ZNF273	695.7	ARCHS4 Coexpression,1286;Enrichr Queries,749;GTEx Coexpression,52	CASP14,BCL11B,GPR87,KRT14,GJB5,PKP1,SERPINB5
CACNA2D2	9.63392e-05	-0.757116	0	0.622	1		726	ZBTB21	696	ARCHS4 Coexpression,1123;GTEx Coexpression,269	FST
GGTLC1	9.63392e-05	-1.24957	0	0.622	1		727	GLIS3	696.3	ARCHS4 Coexpression,190;Enrichr Queries,565;GTEx Coexpression,1334	PLAU,AKR1C2
CIRH1A	9.72723e-05	0.878011	0.846	0.536	1		728	CXXC4	696.7	ARCHS4 Coexpression,871;ReMap ChIP-seq,28;GTEx Coexpression,1191	HOXA3,SSPN,HOXD11,DGKH
ERO1A	9.79001e-05	0.950337	0.923	0.555	1		729	THYN1	697	ARCHS4 Coexpression,843;GTEx Coexpression,551
ABCD4	9.84673e-05	0.480664	0.769	0.254	1		730	ZNF341	698	ARCHS4 Coexpression,619;Enrichr Queries,804;GTEx Coexpression,671
FAM184A	9.84857e-05	-1.03812	0.231	0.746	1		731	BACH1	698.5	Literature ChIP-seq,6;ARCHS4 Coexpression,1273;ENCODE ChIP-seq,56;Enrichr Queries,1284;ReMap ChIP-seq,113;GTEx Coexpression,1459	SFRP1,MMP13,STEAP1B,BCL11B,FABP5,FST,SSPN,AKR1C2,SLC1A3,SNAI2,S100A8
APCDD1	9.91359e-05	0.3502	0.462	0.105	1		732	SNAPC4	698.5	ARCHS4 Coexpression,963;Enrichr Queries,1241;ReMap ChIP-seq,8;GTEx Coexpression,582	AIM2,SAA1,SLC1A3,SAA2,KRT5,KRT6A
MYLIP	9.97323e-05	-1.56438	0.538	0.928	1		733	TBX19	698.7	ARCHS4 Coexpression,1214;Enrichr Queries,593;GTEx Coexpression,289	AIM2,GJB7
EFEMP1	0.00010009	1.51058	0.846	0.526	1		734	AKAP8	699	ARCHS4 Coexpression,734;Enrichr Queries,761;GTEx Coexpression,602
KCNK15	0.000101381	-1.21908	0.077	0.67	1		735	ZNF431	699.7	ARCHS4 Coexpression,1143;Enrichr Queries,909;GTEx Coexpression,47	FABP5,GPR87,GJB5,CLCA2,TMEM40,DSG3,IGFL1,ADH7
ZFHX4	0.000101946	0.651506	0.538	0.148	1		736	ZBTB49	700	ARCHS4 Coexpression,1016;GTEx Coexpression,384	AIM2
FNDC3B	0.000103395	1.06052	1	0.789	1		737	ZFY	701	ARCHS4 Coexpression,767;Enrichr Queries,76;GTEx Coexpression,1260	SFRP1,PLAU,FST,S100A8
BAX	0.000105563	0.528681	0.923	0.526	1		738	CENPX	701	GTEx Coexpression,701
CALM2	0.00010608	-1.413	0.923	1	1		739	IRF7	702.3	ARCHS4 Coexpression,510;Enrichr Queries,656;GTEx Coexpression,941	S100A8
IMPAD1	0.00010749	1.19195	0.615	0.249	1		740	ZFHX4	703.7	ARCHS4 Coexpression,302;Enrichr Queries,232;GTEx Coexpression,1577	SFRP1,PCDHB2,FST,SLC1A3
MARCKSL1	0.000107709	-1.32033	0.308	0.837	1		741	PRDM16	704	Literature ChIP-seq,155;ARCHS4 Coexpression,882;Enrichr Queries,341;GTEx Coexpression,1438	SFRP1,BCL11B
RHBDF1	0.000107951	0.39535	0.615	0.191	1		742	ZNF562	705	ARCHS4 Coexpression,1101;Enrichr Queries,958;GTEx Coexpression,56	FABP5,CLCA2,TMEM40,DSG3,ADH7,S100A8,KRT6A
GM2A	0.000111429	1.43697	0.769	0.416	1		743	FOXI3	706	ARCHS4 Coexpression,1369;GTEx Coexpression,43	CASP14,BCL11B,KRT17,GPR87,KRT14,GJB5,PKP1,SERPINB5
SYT8	0.000116148	0.903506	0.462	0.105	1		744	CLOCK	706	Literature ChIP-seq,146;ARCHS4 Coexpression,1009;Enrichr Queries,788;ReMap ChIP-seq,98;GTEx Coexpression,1489	HOXA3,SSPN
CERCAM	0.000116607	0.284945	0.385	0.072	1		745	ZNF888	707	GTEx Coexpression,707
ZIK1	0.000118045	0.291995	0.308	0.048	1		746	ZNF417	707.3	ARCHS4 Coexpression,492;Enrichr Queries,1168;GTEx Coexpression,462
VDAC1	0.000118157	0.976236	0.923	0.675	1		747	ZNF540	708.7	ARCHS4 Coexpression,932;Enrichr Queries,685;GTEx Coexpression,509	BCL11B
DAPK2	0.000118387	-1.14245	0	0.612	1		748	MYBL1	709.8	Literature ChIP-seq,154;ARCHS4 Coexpression,1487;Enrichr Queries,561;GTEx Coexpression,637	PLAU
GNG5	0.00011927	-1.06482	0.923	0.947	1		749	ZNF286B	710.5	ARCHS4 Coexpression,1004;GTEx Coexpression,417
PALLD	0.000121055	0.813429	0.692	0.258	1		750	YBX3	711.5	ARCHS4 Coexpression,432;GTEx Coexpression,991
MAP1LC3A	0.000121967	-1.07846	0.308	0.77	1		751	PREB	711.7	ARCHS4 Coexpression,460;Enrichr Queries,793;GTEx Coexpression,882
MAT2B	0.000122152	1.00718	0.846	0.579	1		752	ZNF92	711.8	ARCHS4 Coexpression,1107;Enrichr Queries,1104;ReMap ChIP-seq,44;GTEx Coexpression,592	LGALS7B,TMEM40,MDFI
PMEPA1	0.000122418	2.11676	0.846	0.656	1		753	NRF1	712.6	ARCHS4 Coexpression,1122;ENCODE ChIP-seq,80;Enrichr Queries,1216;ReMap ChIP-seq,190;GTEx Coexpression,955	SFRP1,DGKH
IL12RB1	0.000123241	0.551943	0.308	0.048	1		754	FOXN4	712.7	ARCHS4 Coexpression,813;Enrichr Queries,276;GTEx Coexpression,1049	SFRP1,BCL11B,FST
MTHFD1	0.000123349	0.643906	0.846	0.349	1		755	ZNF337	713.3	ARCHS4 Coexpression,653;Enrichr Queries,803;GTEx Coexpression,684
PTP4A1	0.000123609	1.08172	0.923	0.789	1		756	LIN28A	713.5	ARCHS4 Coexpression,263;GTEx Coexpression,1164	SFRP1
PABPC1	0.00012495	0.770702	1	0.981	1		757	TFDP3	713.7	ARCHS4 Coexpression,664;Enrichr Queries,463;GTEx Coexpression,1014	BCL11B,S100A8
ANKRA2	0.000125447	0.28442	0.385	0.072	1		758	DRAP1	714	ARCHS4 Coexpression,594;Enrichr Queries,1281;GTEx Coexpression,267	STEAP1B
GRINA	0.000126193	0.915069	1	0.636	1		759	ZNF114	715.3	ARCHS4 Coexpression,1335;Enrichr Queries,273;GTEx Coexpression,538	PLAU,FST,SNAI2
PARP14	0.000127207	-1.45616	0.923	0.971	1		760	ERG	715.8	Literature ChIP-seq,60;ARCHS4 Coexpression,1489;Enrichr Queries,500;ReMap ChIP-seq,169;GTEx Coexpression,1361	SFRP1,FABP5,HOXA3,KRT5,IGFL1
AKAP13	0.00012776	-1.52397	0.615	0.895	1		761	ZNF267	716.3	ARCHS4 Coexpression,1279;Enrichr Queries,555;GTEx Coexpression,315	AIM2,PLAU
HTATIP2	0.000128359	0.898848	0.923	0.522	1		762	MAZ	716.4	ARCHS4 Coexpression,732;ENCODE ChIP-seq,58;Enrichr Queries,1253;ReMap ChIP-seq,209;GTEx Coexpression,1330	KRT17,PLAU
GBP1	0.000129962	1.20431	0.923	0.459	1		763	NFATC2	717	ARCHS4 Coexpression,1331;Enrichr Queries,392;GTEx Coexpression,428	BCL11B,PLAU
CLNS1A	0.000132464	1.39551	1	0.656	1		764	CRX	717	Literature ChIP-seq,140;ARCHS4 Coexpression,1473;Enrichr Queries,519;GTEx Coexpression,736	ADH7
TTYH3	0.000133443	0.435725	0.846	0.416	1		765	BHLHE22	717	ARCHS4 Coexpression,1325;ReMap ChIP-seq,282;GTEx Coexpression,544
FKBP1A	0.000133953	1.37166	0.846	0.828	1		766	EPAS1	717	ARCHS4 Coexpression,1258;Enrichr Queries,1244;ReMap ChIP-seq,32;GTEx Coexpression,334	CD109,SSPN,PKP1,DGKH,UGT1A6
NHLRC1	0.000134425	1.31871	0.615	0.201	1		767	ZNF615	717.3	ARCHS4 Coexpression,193;Enrichr Queries,1087;GTEx Coexpression,872	PODNL1
RGS2	0.000137143	-0.309819	0.154	0.799	1		768	PRDM5	717.5	Literature ChIP-seq,110;ARCHS4 Coexpression,1537;Enrichr Queries,197;GTEx Coexpression,1026	SFRP1,FST,CD109,HOXA3
PLEKHG6	0.000137371	0.329534	0.385	0.077	1		769	ZNF696	717.7	ARCHS4 Coexpression,366;Enrichr Queries,787;GTEx Coexpression,1000	PCDHB2
DHX36	0.000137577	0.461473	1	0.531	1		770	TERF1	719	ARCHS4 Coexpression,294;Enrichr Queries,1252;ReMap ChIP-seq,29;GTEx Coexpression,1301	MFAP5,SFRP1,PLAU,SAA1,SAA2
YWHAQ	0.000137729	0.959136	1	0.88	1		771	FOXK2	719	ARCHS4 Coexpression,872;Enrichr Queries,774;ReMap ChIP-seq,221;GTEx Coexpression,1009
EIF1	0.000139252	-1.07289	1	0.995	1		772	ZNF771	719.3	ARCHS4 Coexpression,520;Enrichr Queries,501;GTEx Coexpression,1137	PLAU
GCNT2	0.000139279	-0.89522	0.154	0.766	1		773	TFAP4	720	ARCHS4 Coexpression,1098;Enrichr Queries,968;ReMap ChIP-seq,211;GTEx Coexpression,603
IGFBP3	0.000140152	0.75776	0.308	0.048	1		774	YY2	720.3	ARCHS4 Coexpression,1615;Enrichr Queries,404;GTEx Coexpression,142	STEAP1B,CD109,FST,SNAI2
GPAA1	0.000140892	0.713501	1	0.593	1		775	CTCFL	720.8	ARCHS4 Coexpression,1031;ENCODE ChIP-seq,88;Enrichr Queries,1190;ReMap ChIP-seq,106;GTEx Coexpression,1189	STEAP1B,HOXA3,HOXD11
IRS2	0.00014121	0.889947	0.615	0.201	1		776	PHOX2A	722.3	ARCHS4 Coexpression,450;Enrichr Queries,308;GTEx Coexpression,1409	SFRP1,FST
FTSJ1	0.000142245	0.806995	0.769	0.335	1		777	ZNF766	723	ARCHS4 Coexpression,1111;Enrichr Queries,991;ReMap ChIP-seq,69;GTEx Coexpression,721	AIM2,IGFL1
PPP1R9A	0.000143838	-1.12071	0.077	0.646	1		778	LCOR	723.3	ARCHS4 Coexpression,158;Enrichr Queries,894;GTEx Coexpression,1118	BCL11B
PTGFRN	0.000144897	1.53159	0.692	0.301	1		779	ZNF675	724	ARCHS4 Coexpression,1036;Enrichr Queries,996;GTEx Coexpression,140	GPR87,GJB5,SERPINB5
ZWILCH	0.000145055	0.278806	0.385	0.072	1		780	KLF13	724.8	ARCHS4 Coexpression,1023;Enrichr Queries,883;ReMap ChIP-seq,271;GTEx Coexpression,722
TMEM91	0.000145902	0.345277	0.538	0.153	1		781	IRF2	724.8	ARCHS4 Coexpression,869;Enrichr Queries,844;ReMap ChIP-seq,236;GTEx Coexpression,950
IPO5	0.000146828	0.353094	0.846	0.344	1		782	ZNF331	725.3	ARCHS4 Coexpression,541;Enrichr Queries,1392;GTEx Coexpression,243	GJB7
CFL1	0.000146966	0.987209	1	1	1		783	PHOX2B	726	ARCHS4 Coexpression,645;Enrichr Queries,207;GTEx Coexpression,1326	SFRP1,BCL11B,HOXD11
EXT1	0.000147155	0.489055	0.846	0.378	1		784	ZNF205	726.3	ARCHS4 Coexpression,647;Enrichr Queries,1036;GTEx Coexpression,496
MRPL55	0.000147465	-1.47849	0.769	0.919	1		785	CREB1	726.5	Literature ChIP-seq,122;ARCHS4 Coexpression,1453;ENCODE ChIP-seq,72;Enrichr Queries,1116;ReMap ChIP-seq,196;GTEx Coexpression,1400	ANO1,FST,KRT14,HOXA3,PKP1
CENPF	0.000152905	0.31066	0.462	0.1	1		786	ZNF724	727	ARCHS4 Coexpression,762;GTEx Coexpression,692
OSTC	0.000154728	0.882074	0.846	0.627	1		787	ZNF699	728	ARCHS4 Coexpression,709;Enrichr Queries,1238;GTEx Coexpression,237	CD109
TBC1D24	0.000155508	-1.47625	0.231	0.78	1		788	MYT1L	728.7	ARCHS4 Coexpression,531;Enrichr Queries,681;GTEx Coexpression,974	BCL11B
IDO1	0.000156121	1.37937	0.462	0.12	1		789	ZNF597	728.7	ARCHS4 Coexpression,1268;Enrichr Queries,499;GTEx Coexpression,419	PLAU
CDC42SE2	0.000157224	0.751495	0.846	0.522	1		790	ZNF804A	729.3	ARCHS4 Coexpression,601;Enrichr Queries,675;GTEx Coexpression,912	FST
DNAJC3	0.000160355	1.1685	1	0.818	1		791	NR3C2	729.3	ARCHS4 Coexpression,437;Enrichr Queries,1319;GTEx Coexpression,432
NUCKS1	0.000160719	0.836594	1	0.986	1		792	ZNF423	729.7	ARCHS4 Coexpression,1338;Enrichr Queries,507;GTEx Coexpression,344	SFRP1,SSPN
DNAJB1	0.000160721	-0.641494	1	0.99	1		793	ZNF648	730.3	ARCHS4 Coexpression,1079;Enrichr Queries,697;GTEx Coexpression,415	SFRP1
TXNL1	0.000161429	1.0412	0.923	0.56	1		794	ZSCAN5B	731.3	ARCHS4 Coexpression,1249;Enrichr Queries,288;GTEx Coexpression,657	PCDHB2,GJB5,ADH7
ANTXR1	0.000163555	0.467121	0.615	0.201	1		795	NFE2L3	732.3	ARCHS4 Coexpression,666;Enrichr Queries,277;GTEx Coexpression,1254	SFRP1,PLAU,FST
CLDN1	0.00016366	1.92085	0.769	0.402	1		796	RBPJL	732.3	ARCHS4 Coexpression,1344;Enrichr Queries,320;GTEx Coexpression,533	SFRP1,BCL11B
ENY2	0.000163992	0.467361	1	0.799	1		797	ZFP30	733	ARCHS4 Coexpression,412;Enrichr Queries,1117;GTEx Coexpression,670
PANK2	0.000164278	0.671048	0.846	0.388	1		798	THAP2	733.3	ARCHS4 Coexpression,140;Enrichr Queries,1075;GTEx Coexpression,985	PCDHB2
PSMA1	0.000165144	1.26387	1	0.809	1		799	ZNF705E	733.5	ARCHS4 Coexpression,835;GTEx Coexpression,632
NETO2	0.000167171	0.75558	0.769	0.33	1		800	ZNF317	734	ARCHS4 Coexpression,564;Enrichr Queries,1133;GTEx Coexpression,505
KRT18	0.000169534	-1.37508	1	0.976	1		801	KDM2A	734	ARCHS4 Coexpression,1076;GTEx Coexpression,392
OCLN	0.00016965	-0.886987	0.231	0.766	1		802	ZNF471	734.7	ARCHS4 Coexpression,1077;Enrichr Queries,401;GTEx Coexpression,726	SFRP1,SSPN
ZDHHC17	0.000173631	0.283245	0.385	0.072	1		803	KMT2B	735	ARCHS4 Coexpression,1189;ReMap ChIP-seq,281
TNFRSF21	0.000173645	0.35681	0.615	0.191	1		804	FOXB2	735	ARCHS4 Coexpression,433;Enrichr Queries,294;GTEx Coexpression,1478	BCL11B,HOXD11
HPS6	0.00017578	0.420445	0.385	0.077	1		805	GTF3A	736	ARCHS4 Coexpression,418;Enrichr Queries,920;GTEx Coexpression,870
MTCH2	0.000177872	0.920808	0.923	0.608	1		806	SP110	736	ARCHS4 Coexpression,1173;Enrichr Queries,492;GTEx Coexpression,543	AIM2
CARS2	0.000177884	0.593928	0.846	0.388	1		807	ZNF732	736.5	ARCHS4 Coexpression,878;GTEx Coexpression,595
STARD5	0.000179255	0.573119	0.462	0.11	1		808	TSHZ3	736.7	ARCHS4 Coexpression,217;Enrichr Queries,508;GTEx Coexpression,1485	BCL11B,SNAI2
GTF2F2	0.000180038	0.339643	0.769	0.311	1		809	ZHX3	737.3	ARCHS4 Coexpression,175;Enrichr Queries,854;GTEx Coexpression,1183	SLC1A3
USP31	0.000180148	0.665182	0.615	0.22	1		810	SOX30	739.3	ARCHS4 Coexpression,788;Enrichr Queries,80;GTEx Coexpression,1350	MMP13,FST,ADH7,HOXD11
QSER1	0.000184874	0.476783	0.692	0.23	1		811	ZBTB39	740.7	ARCHS4 Coexpression,517;Enrichr Queries,928;GTEx Coexpression,777
KIRREL	0.000185211	0.568625	0.462	0.105	1		812	ZNF236	741	ARCHS4 Coexpression,289;Enrichr Queries,927;GTEx Coexpression,1007	DGKH
PRRG2	0.000194844	0.275589	0.538	0.134	1		813	TGIF1	741.7	ARCHS4 Coexpression,1024;Enrichr Queries,452;GTEx Coexpression,749	PLAU,FST
COPS5	0.000194917	0.998337	0.923	0.517	1		814	ZNF823	742.3	ARCHS4 Coexpression,1444;Enrichr Queries,695;GTEx Coexpression,88	FABP5,PLAU,GPR87,CLCA2,TMEM40,DSG3,ADH7
ZNF814	0.000195454	0.393912	0.923	0.392	1		815	ZFP3	742.3	ARCHS4 Coexpression,528;Enrichr Queries,617;GTEx Coexpression,1082	BCL11B
USP54	0.000195463	-0.84315	0	0.589	1		816	ZNF398	743.3	ARCHS4 Coexpression,751;Enrichr Queries,937;GTEx Coexpression,542
AHCY	0.000198579	0.936542	1	0.694	1		817	ZNF804B	743.7	ARCHS4 Coexpression,497;Enrichr Queries,1208;GTEx Coexpression,526
NUDCD1	0.000199212	0.461926	0.692	0.268	1		818	CSRNP3	745	ARCHS4 Coexpression,847;GTEx Coexpression,643
GOT2	0.000200219	0.982277	0.923	0.541	1		819	ZSCAN1	745.3	ARCHS4 Coexpression,267;Enrichr Queries,694;GTEx Coexpression,1275	BCL11B,PCDHB2
DTX2	0.000200349	0.773454	0.846	0.368	1		820	ZNF581	746	ARCHS4 Coexpression,423;Enrichr Queries,1402;GTEx Coexpression,413
CRACR2B	0.00020038	-1.08136	0.154	0.732	1		821	TBX3	746.5	Literature ChIP-seq,79;ARCHS4 Coexpression,1091;Enrichr Queries,264;GTEx Coexpression,1552	SFRP1,FST,SNAI2,SLC1A3,S100A8
SLC1A5	0.000200428	1.27975	0.923	0.689	1		822	KLF2	747	Literature ChIP-seq,157;ARCHS4 Coexpression,1315;Enrichr Queries,443;GTEx Coexpression,1073	PLAU,S100A8
NR2F2	0.000201975	-0.673553	0.077	0.66	1		823	ZSCAN10	747	ARCHS4 Coexpression,318;Enrichr Queries,1005;GTEx Coexpression,918	SFRP1
ZNF622	0.00020242	0.66304	0.923	0.435	1		824	ZNF322	747.5	ARCHS4 Coexpression,137;GTEx Coexpression,1358	PCDHB2
AGR2	0.000204604	-1.56753	0.231	0.799	1		825	MEF2C	748.4	ARCHS4 Coexpression,1120;ENCODE ChIP-seq,117;Enrichr Queries,1375;ReMap ChIP-seq,141;GTEx Coexpression,989	MFAP5
OXCT1	0.000205117	0.305898	0.538	0.158	1		826	ZNF850	748.5	ARCHS4 Coexpression,1012;GTEx Coexpression,485
WFDC2	0.000205476	-0.643283	0.308	0.895	1		827	TIGD3	749.7	ARCHS4 Coexpression,574;Enrichr Queries,688;GTEx Coexpression,987	ADH7
EIF2S2	0.000205664	0.5338	1	0.938	1		828	SATB2	750	ARCHS4 Coexpression,1132;Enrichr Queries,330;GTEx Coexpression,788	BCL11B,FST
UBLCP1	0.000205686	0.480231	0.923	0.493	1		829	NEUROD6	750.7	ARCHS4 Coexpression,228;Enrichr Queries,585;GTEx Coexpression,1439	BCL11B
C5orf28	0.000207366	0.368386	0.615	0.22	1		830	MYRFL	751	ARCHS4 Coexpression,428;GTEx Coexpression,1074
TXNIP	0.000209683	1.40476	0.923	0.627	1		831	SOX5	751	ARCHS4 Coexpression,236;Enrichr Queries,413;GTEx Coexpression,1604	SFRP1,BCL11B
THOC3	0.000210705	0.337945	0.769	0.335	1		832	PHF21A	751.7	ARCHS4 Coexpression,797;Enrichr Queries,947;GTEx Coexpression,511
HOXD1	0.000211244	-1.19444	0.077	0.646	1		833	SOX17	751.8	Literature ChIP-seq,89;ARCHS4 Coexpression,1505;Enrichr Queries,278;GTEx Coexpression,1135	SFRP1,MMP13,FST,SNAI2,SLC1A3,ADH7
CD63	0.000218871	-1.5096	0.923	0.957	1		834	ZNF319	753	ARCHS4 Coexpression,1082;Enrichr Queries,756;GTEx Coexpression,421
MTMR9	0.000218994	0.387484	0.462	0.115	1		835	MLXIPL	753.7	ARCHS4 Coexpression,951;Enrichr Queries,568;GTEx Coexpression,742	ADH7
CES2	0.000220318	0.267743	1	0.44	1		836	ZNF426	753.7	ARCHS4 Coexpression,994;Enrichr Queries,1178;GTEx Coexpression,89	FABP5,CLCA2,TMEM40,DSG3,IGFL1,ADH7
XRN2	0.0002206	0.576025	1	0.703	1		837	ZNF514	754	ARCHS4 Coexpression,672;Enrichr Queries,520;GTEx Coexpression,1070	BCL11B
HMGN4	0.000220872	0.800988	0.769	0.354	1		838	ZNF830	754.3	ARCHS4 Coexpression,1193;Enrichr Queries,851;GTEx Coexpression,219	AIM2
MAPK1IP1L	0.000221626	0.835116	1	0.718	1		839	SCML4	754.7	ARCHS4 Coexpression,1136;Enrichr Queries,477;GTEx Coexpression,651	AIM2,BCL11B
VRK2	0.000221705	0.501141	0.692	0.258	1		840	THAP11	757	Literature ChIP-seq,137;ARCHS4 Coexpression,1580;Enrichr Queries,780;ReMap ChIP-seq,290;GTEx Coexpression,998
GINS3	0.000222174	0.430999	0.308	0.053	1		841	SEBOX	757.5	ARCHS4 Coexpression,1058;Enrichr Queries,457	ADH7,S100A8
NKX3-1	0.000224128	0.598347	0.385	0.077	1		842	ZNF596	758.3	ARCHS4 Coexpression,677;Enrichr Queries,904;GTEx Coexpression,694
HOMER3	0.000224555	0.768799	0.692	0.263	1		843	ZFP64	758.7	ARCHS4 Coexpression,1495;Enrichr Queries,687;GTEx Coexpression,94	BCL11B,GPR87,KRT14,GJB5,PKP1,SERPINB5
BTG2	0.000225159	-1.17108	0.462	0.856	1		844	ZNF831	759	ARCHS4 Coexpression,1280;Enrichr Queries,489;GTEx Coexpression,508	BCL11B
TARS	0.000226513	0.693104	0.923	0.574	1		845	TERF2	759.3	ARCHS4 Coexpression,1064;Enrichr Queries,1064;ReMap ChIP-seq,255;GTEx Coexpression,654
C8orf4	0.000227966	1.86868	0.231	0.029	1		846	ZNF621	760	ARCHS4 Coexpression,1357;Enrichr Queries,750;GTEx Coexpression,173	CD109,SNAI2
LBP	0.000227966	2.06275	0.231	0.029	1		847	ZNF688	760	ARCHS4 Coexpression,936;Enrichr Queries,488;GTEx Coexpression,856	PLAU
CTTN	0.000228068	1.13357	1	0.919	1		848	NFIC	760	ARCHS4 Coexpression,1406;ENCODE ChIP-seq,36;Enrichr Queries,1213;ReMap ChIP-seq,48;GTEx Coexpression,1097	PLAU,PKP1,BBOX1-AS1,HOXD11
GPI	0.000228723	0.85298	1	0.856	1		849	HBP1	760	ARCHS4 Coexpression,584;Enrichr Queries,1300;ReMap ChIP-seq,227;GTEx Coexpression,929
CRKL	0.00022932	0.673137	0.692	0.273	1		850	MAFF	760.2	ARCHS4 Coexpression,1618;ENCODE ChIP-seq,78;Enrichr Queries,430;ReMap ChIP-seq,208;GTEx Coexpression,1467	MMP13,PLAU,S100A8
NIPSNAP3A	0.000230268	0.553432	0.692	0.292	1		851	ZNF783	760.3	ARCHS4 Coexpression,381;Enrichr Queries,1013;GTEx Coexpression,887	BCL11B
ELAC2	0.000231318	0.375158	0.846	0.306	1		852	ZFHX2	760.3	ARCHS4 Coexpression,593;Enrichr Queries,651;GTEx Coexpression,1037	BCL11B
VARS	0.000231319	0.704894	0.769	0.325	1		853	ZNF691	760.7	ARCHS4 Coexpression,783;Enrichr Queries,910;GTEx Coexpression,589
KIAA0196	0.000231534	0.399711	0.615	0.177	1		854	ZNF706	760.7	ARCHS4 Coexpression,1241;Enrichr Queries,855;GTEx Coexpression,186	PKP1,SERPINB5
TCEB1	0.000232328	0.77708	1	0.852	1		855	ZNF251	761.3	ARCHS4 Coexpression,389;Enrichr Queries,601;GTEx Coexpression,1294	SLC1A3
PTGES3	0.000232419	0.784321	1	0.933	1		856	NEUROD4	762.7	ARCHS4 Coexpression,1577;Enrichr Queries,425;GTEx Coexpression,286	SFRP1,GJB7,ADH7
TM7SF3	0.000236603	1.22221	0.846	0.522	1		857	ELF4	762.7	ARCHS4 Coexpression,777;Enrichr Queries,626;GTEx Coexpression,885	PLAU
CNN2	0.0002401	1.09597	1	0.813	1		858	ZFP1	763	ARCHS4 Coexpression,170;Enrichr Queries,1083;GTEx Coexpression,1036	PCDHB2
CNIH1	0.00024024	0.900343	0.846	0.502	1		859	ZBED4	763	ARCHS4 Coexpression,961;Enrichr Queries,735;GTEx Coexpression,593
PLRG1	0.000241096	0.530397	0.769	0.311	1		860	ZNF66	763	ARCHS4 Coexpression,857;GTEx Coexpression,669
HSPA1A	0.000244206	-1.01509	0.154	0.665	1		861	HES4	763.3	ARCHS4 Coexpression,233;Enrichr Queries,484;GTEx Coexpression,1573	PLAU,HOXD11
AGPS	0.000247587	0.411065	0.846	0.364	1		862	ZNF385C	763.7	ARCHS4 Coexpression,1026;Enrichr Queries,691;GTEx Coexpression,574	MDFI
GTF3A	0.000249336	0.78747	0.846	0.411	1		863	GTF2IRD1	764	ARCHS4 Coexpression,544;GTEx Coexpression,984
POMC	0.00024946	-0.490789	0.077	0.636	1		864	MAFA	765.3	ARCHS4 Coexpression,581;Enrichr Queries,398;GTEx Coexpression,1317	BCL11B,FST
PMVK	0.000250047	-1.36445	0.462	0.856	1		865	MSC	765.3	ARCHS4 Coexpression,759;Enrichr Queries,63;GTEx Coexpression,1474	SFRP1,PLAU,FST,SLC1A3,SNAI2
FMNL2	0.000250394	0.498753	0.615	0.191	1		866	SOX14	765.3	ARCHS4 Coexpression,523;Enrichr Queries,486;GTEx Coexpression,1287	HOXD11
TMEM242	0.000251214	0.492372	0.692	0.249	1		867	BAZ2A	765.3	ARCHS4 Coexpression,447;Enrichr Queries,763;GTEx Coexpression,1086
GUF1	0.000256928	0.43	0.615	0.215	1		868	VSX2	765.7	ARCHS4 Coexpression,550;Enrichr Queries,300;GTEx Coexpression,1447	BCL11B,HOXD11
ZNF236	0.0002571	0.328487	0.385	0.077	1		869	DOT1L	766	ARCHS4 Coexpression,641;Enrichr Queries,766;GTEx Coexpression,891
ZNF106	0.000259636	-1.13459	0.538	0.9	1		870	NFYB	766.4	ARCHS4 Coexpression,1221;ENCODE ChIP-seq,60;Enrichr Queries,815;ReMap ChIP-seq,177;GTEx Coexpression,1559	PODNL1,AIM2,FABP5
TFAP2A	0.00026015	0.567573	0.923	0.502	1		871	ZNF366	767.3	ARCHS4 Coexpression,737;Enrichr Queries,524;GTEx Coexpression,1041	SLC1A3
ERICH2	0.000261646	-0.638288	0	0.574	1		872	KLF15	767.3	ARCHS4 Coexpression,448;Enrichr Queries,249;GTEx Coexpression,1605	SFRP1,FST,SLC1A3
SNRPB	0.000262924	0.885631	1	0.856	1		873	ZNF384	767.4	ARCHS4 Coexpression,1362;ENCODE ChIP-seq,25;Enrichr Queries,930;ReMap ChIP-seq,243;GTEx Coexpression,1277	SFRP1,AIM2,BCL11B,HOXA3
TP73	0.000265759	0.806235	0.462	0.124	1		874	ZNF143	767.6	ARCHS4 Coexpression,1457;ENCODE ChIP-seq,45;Enrichr Queries,1266;ReMap ChIP-seq,213;GTEx Coexpression,857	MFAP5,PODNL1,S100A8
TFDP1	0.000267248	0.329925	0.692	0.263	1		875	KLF11	768	ARCHS4 Coexpression,533;Enrichr Queries,1221;GTEx Coexpression,550
TEX30	0.000267423	0.255744	0.615	0.187	1		876	ZNF416	768	ARCHS4 Coexpression,1200;Enrichr Queries,1011;GTEx Coexpression,93	CASP14,GPR87,GJB5,PKP1,SERPINB5
BCL2L13	0.000270557	0.643365	0.769	0.306	1		877	TBX5	769.5	Literature ChIP-seq,117;ARCHS4 Coexpression,1468;Enrichr Queries,261;GTEx Coexpression,1232	SFRP1,PODNL1,BCL11B,SNAI2
LDOC1L	0.000273091	0.351343	0.538	0.158	1		878	RORC	770.3	ARCHS4 Coexpression,964;Enrichr Queries,446;GTEx Coexpression,901	PLAU,S100A8
SNX7	0.000273229	0.36478	0.385	0.081	1		879	NAIF1	770.5	ARCHS4 Coexpression,941;GTEx Coexpression,600
SRPK1	0.000276358	0.452182	0.923	0.383	1		880	SMYD3	772.5	ARCHS4 Coexpression,1063;GTEx Coexpression,482
RPF2	0.00027736	0.397488	0.846	0.378	1		881	ZNF45	772.7	ARCHS4 Coexpression,424;Enrichr Queries,1191;GTEx Coexpression,703
TPD52	0.000278458	0.545249	0.692	0.316	1		882	FOXD4L4	773	ARCHS4 Coexpression,522;GTEx Coexpression,1024
CD14	0.000280276	1.54221	0.385	0.091	1		883	ZNF502	773.3	ARCHS4 Coexpression,800;Enrichr Queries,371;GTEx Coexpression,1149	SFRP1,SLC1A3
PFN1	0.000281797	0.674733	1	0.986	1		884	ZNF606	773.3	ARCHS4 Coexpression,183;Enrichr Queries,923;GTEx Coexpression,1214	PCDHB2
ITGA5	0.000282324	0.508126	0.308	0.053	1		885	ZNF776	773.7	ARCHS4 Coexpression,393;Enrichr Queries,1040;GTEx Coexpression,888
MTCL1	0.000282324	0.260681	0.308	0.053	1		886	EEA1	775	ARCHS4 Coexpression,1040;Enrichr Queries,943;GTEx Coexpression,342	CD109
TEFM	0.000283631	0.447931	0.538	0.163	1		887	ATOH1	775.7	ARCHS4 Coexpression,570;Enrichr Queries,505;GTEx Coexpression,1252	BCL11B
SYNCRIP	0.000287881	0.922032	1	0.799	1		888	PRDM15	775.7	ARCHS4 Coexpression,1154;Enrichr Queries,753;GTEx Coexpression,420
RCN1	0.000291711	1.32572	0.923	0.641	1		889	FOXJ3	776	ARCHS4 Coexpression,764;Enrichr Queries,859;GTEx Coexpression,705
MRPL47	0.000292339	0.589956	0.923	0.589	1		890	ZNF365	776.7	ARCHS4 Coexpression,610;Enrichr Queries,649;GTEx Coexpression,1071	PLAU
WNT4	0.000294182	0.795916	0.692	0.268	1		891	ZNF367	776.7	ARCHS4 Coexpression,161;Enrichr Queries,1337;GTEx Coexpression,832	TMEM40
PRKDC	0.000295729	0.64776	1	0.646	1		892	ZNF474	777.7	ARCHS4 Coexpression,278;Enrichr Queries,502;GTEx Coexpression,1553	MMP13,ADH7
ERBB3	0.000299997	-1.12124	0.308	0.785	1		893	NFX1	778	ARCHS4 Coexpression,1043;Enrichr Queries,785;GTEx Coexpression,506
TSPO	0.000301339	1.01693	1	0.852	1		894	ZMAT1	779.7	ARCHS4 Coexpression,268;Enrichr Queries,830;GTEx Coexpression,1241	SLC1A3
SET	0.000301746	1.03993	1	0.957	1		895	CREM	779.8	Literature ChIP-seq,129;ARCHS4 Coexpression,918;Enrichr Queries,1211;ReMap ChIP-seq,254;GTEx Coexpression,1387
THUMPD3-AS1	0.000302525	-1.40989	0.615	0.833	1		896	ESRRG	780	ARCHS4 Coexpression,466;Enrichr Queries,453;GTEx Coexpression,1421	SFRP1,BCL11B
WDR18	0.000303921	0.825821	0.769	0.349	1		897	DNMT1	782	ARCHS4 Coexpression,665;GTEx Coexpression,899
FAM111B	0.000305555	0.671824	0.308	0.053	1		898	E2F2	782.3	ARCHS4 Coexpression,755;Enrichr Queries,931;GTEx Coexpression,661
AHNAK	0.000308258	1.46302	0.846	0.651	1		899	RHOXF2B	783	ARCHS4 Coexpression,826;Enrichr Queries,472;GTEx Coexpression,1051	KRT17,ADH7
CDCA4	0.000310517	1.01786	0.538	0.158	1		900	ZNF646	783	ARCHS4 Coexpression,662;Enrichr Queries,1009;GTEx Coexpression,678
ST6GALNAC2	0.000312834	1.09832	0.615	0.254	1		901	ALX3	783.3	ARCHS4 Coexpression,942;Enrichr Queries,75;GTEx Coexpression,1333	BCL11B,HOXA3,ADH7,HOXD11
EFR3A	0.000313653	0.565275	0.846	0.392	1		902	NFYC	783.3	ARCHS4 Coexpression,539;Enrichr Queries,897;GTEx Coexpression,914
YIF1B	0.000313994	0.556968	1	0.684	1		903	PA2G4	783.5	ARCHS4 Coexpression,946;GTEx Coexpression,621
GPR160	0.000314396	-0.578549	0.154	0.699	1		904	ZNF443	783.7	ARCHS4 Coexpression,1407;Enrichr Queries,559;GTEx Coexpression,385	AIM2,SNAI2
ABCE1	0.000316219	0.543093	0.769	0.344	1		905	SP140	783.7	ARCHS4 Coexpression,1296;Enrichr Queries,717;GTEx Coexpression,338	AIM2
SHB	0.000318411	0.834241	0.615	0.249	1		906	OLIG2	785.5	Literature ChIP-seq,33;ARCHS4 Coexpression,1440;Enrichr Queries,196;GTEx Coexpression,1473	SFRP1,BCL11B,FABP5,PLAU,SLC1A3,TMEM40,ADH7,DGKH
GSAP	0.000320673	-0.532591	0.077	0.632	1		907	ZBTB34	785.7	ARCHS4 Coexpression,816;Enrichr Queries,889;GTEx Coexpression,652
PEX2	0.000322299	0.722302	0.769	0.392	1		908	HMGA1	788	ARCHS4 Coexpression,891;Enrichr Queries,1094;GTEx Coexpression,379	STEAP1B
SLC35F2	0.000324696	0.654051	0.846	0.383	1		909	NFAT5	788.3	ARCHS4 Coexpression,255;Enrichr Queries,1077;GTEx Coexpression,1033	DGKH
TMEM33	0.000325442	1.05111	0.923	0.722	1		910	AKNA	788.7	ARCHS4 Coexpression,855;Enrichr Queries,760;GTEx Coexpression,751
LTBR	0.000326973	1.04943	0.923	0.708	1		911	ZNF662	788.7	ARCHS4 Coexpression,1460;Enrichr Queries,497;GTEx Coexpression,409	SFRP1
DR1	0.000327779	0.454896	0.769	0.311	1		912	ZBTB11	788.8	ARCHS4 Coexpression,1270;Enrichr Queries,983;ReMap ChIP-seq,268;GTEx Coexpression,634
C7orf49	0.00033684	0.63157	0.692	0.273	1		913	TEAD1	789.5	ARCHS4 Coexpression,1564;Enrichr Queries,1262;ReMap ChIP-seq,30;GTEx Coexpression,302	PLAU,MIR205HG,SSPN,PKP1,IGFL1
PDIA4	0.000346951	1.36902	1	0.823	1		914	HOXD1	789.7	ARCHS4 Coexpression,860;Enrichr Queries,193;GTEx Coexpression,1316	SFRP1,FST,HOXD11
SLC33A1	0.000347199	0.290496	0.692	0.234	1		915	ZNF578	789.7	ARCHS4 Coexpression,1546;Enrichr Queries,689;GTEx Coexpression,134	SFRP1,STEAP1B,PCDHB2,SNAI2
STK24	0.000347886	0.510474	0.923	0.502	1		916	STAT2	789.8	ARCHS4 Coexpression,945;ENCODE ChIP-seq,21;Enrichr Queries,1376;ReMap ChIP-seq,266;GTEx Coexpression,1341	AIM2
2025-03-01	0.000351343	-0.918547	0.154	0.727	1		917	ERF	791.3	ARCHS4 Coexpression,801;Enrichr Queries,1128;GTEx Coexpression,445
UBE2V2	0.000359447	0.950805	0.769	0.483	1		918	ZNF681	792.7	ARCHS4 Coexpression,969;Enrichr Queries,862;GTEx Coexpression,547
MYL6	0.00036424	-1.13126	1	0.995	1		919	ZNF670	793	ARCHS4 Coexpression,238;Enrichr Queries,1348	SSPN
APP	0.000371397	1.41502	0.923	0.828	1		920	ZSCAN23	793.3	ARCHS4 Coexpression,147;Enrichr Queries,1185;GTEx Coexpression,1048	PCDHB2
TNFRSF12A	0.000375466	1.05511	0.923	0.804	1		921	TFEC	795.7	ARCHS4 Coexpression,769;Enrichr Queries,291;GTEx Coexpression,1327	AIM2,PLAU,S100A8
TRIM5	0.000379844	0.810713	0.923	0.522	1		922	ZNF683	795.7	ARCHS4 Coexpression,717;Enrichr Queries,162;GTEx Coexpression,1508	AIM2,BCL11B,S100A8
BTBD10	0.000380129	0.5396	0.692	0.249	1		923	IKZF5	795.7	ARCHS4 Coexpression,974;Enrichr Queries,924;GTEx Coexpression,489
ERRFI1	0.000386069	-1.10168	0.385	0.871	1		924	HMG20A	796	ARCHS4 Coexpression,912;Enrichr Queries,1068;GTEx Coexpression,408
URI1	0.000386887	0.500943	0.846	0.469	1		925	DDIT3	796	ARCHS4 Coexpression,1291;Enrichr Queries,642;GTEx Coexpression,455	PLAU
LRP12	0.000387243	0.315647	0.308	0.057	1		926	VENTX	796.3	ARCHS4 Coexpression,1179;Enrichr Queries,339;GTEx Coexpression,871	PLAU,S100A8
OAT	0.000390212	1.27332	0.846	0.574	1		927	THRA	797	Literature ChIP-seq,151;ARCHS4 Coexpression,1588;Enrichr Queries,1236;GTEx Coexpression,213	SLC1A3
COL18A1	0.000397056	0.509086	0.538	0.172	1		928	ZNF705A	797.3	ARCHS4 Coexpression,848;Enrichr Queries,172;GTEx Coexpression,1372	MMP13,PLAU,S100A8
AP3S1	0.000397481	0.441397	0.615	0.234	1		929	ZFP28	797.7	ARCHS4 Coexpression,881;Enrichr Queries,637;GTEx Coexpression,875	SFRP1
FBP1	0.00039789	-1.13456	0.154	0.684	1		930	ZNF790	797.7	ARCHS4 Coexpression,915;Enrichr Queries,987;GTEx Coexpression,491
ITGAV	0.000398349	0.28889	0.769	0.306	1		931	ZIK1	798	ARCHS4 Coexpression,1467;Enrichr Queries,379;GTEx Coexpression,548	SFRP1,FST
LARP4	0.000399576	0.452316	0.846	0.45	1		932	ZNF20	798	ARCHS4 Coexpression,487;Enrichr Queries,680;GTEx Coexpression,1227	PLAU
BID	0.000402541	0.777919	0.769	0.421	1		933	AEBP1	799	ARCHS4 Coexpression,1363;GTEx Coexpression,235	ANO1
RBM12B	0.000406879	0.404034	0.538	0.172	1		934	ZBTB22	799.3	ARCHS4 Coexpression,1170;Enrichr Queries,1127;GTEx Coexpression,101	CASP14,BCL11B,GJB5,PKP1,SERPINB5
BLCAP	0.000409324	1.38651	0.846	0.632	1		935	MECOM	799.7	Literature ChIP-seq,112;ARCHS4 Coexpression,757;GTEx Coexpression,1530	PODNL1,TMEM40
NPLOC4	0.000410093	0.769824	0.923	0.517	1		936	ZFP57	800	ARCHS4 Coexpression,885;Enrichr Queries,353;GTEx Coexpression,1162	SFRP1,FST
RBBP4	0.000414976	0.743974	0.923	0.622	1		937	SOX10	800.3	ARCHS4 Coexpression,1549;Enrichr Queries,225;ReMap ChIP-seq,31;GTEx Coexpression,1396	SFRP1,STEAP1B,FABP5,SSPN,SNAI2,SLC1A3
ATAD1	0.0004161	0.682116	0.769	0.344	1		938	E2F6	801	ARCHS4 Coexpression,1230;ENCODE ChIP-seq,75;Enrichr Queries,1027;ReMap ChIP-seq,193;GTEx Coexpression,1480	STEAP1B,HOXD11
KCNJ2-AS1	0.000416295	0.250369	0.231	0.029	1		939	MLXIP	801.3	ARCHS4 Coexpression,1037;Enrichr Queries,945;GTEx Coexpression,422
AGR3	0.000419109	-1.35028	0	0.55	1		940	ZNF710	801.7	ARCHS4 Coexpression,464;Enrichr Queries,864;GTEx Coexpression,1077
IFNGR1	0.000424227	1.84173	0.846	0.612	1		941	DMRTB1	801.7	ARCHS4 Coexpression,934;Enrichr Queries,518;GTEx Coexpression,953	BCL11B
JUND	0.000430843	-0.69814	0.615	0.971	1		942	SOX6	801.8	ARCHS4 Coexpression,1204;Enrichr Queries,433;ReMap ChIP-seq,73;GTEx Coexpression,1497	SFRP1,STEAP1B,PLAU,SLC1A3
ELAVL1	0.000434047	0.35084	1	0.545	1		943	ADNP	803.3	ARCHS4 Coexpression,977;Enrichr Queries,816;ReMap ChIP-seq,72;GTEx Coexpression,1348	PODNL1,TMEM40
UBE2W	0.000436682	0.657661	0.769	0.45	1		944	ZIC1	803.3	ARCHS4 Coexpression,1433;Enrichr Queries,209;GTEx Coexpression,768	SFRP1,BCL11B,FST
POLR2K	0.000442595	0.664047	1	0.718	1		945	NME2	804.3	ARCHS4 Coexpression,842;ReMap ChIP-seq,146;GTEx Coexpression,1425	HOXA3
RPL23A	0.000451236	0.70809	1	0.904	1		946	PTF1A	805.3	ARCHS4 Coexpression,1346;Enrichr Queries,307;GTEx Coexpression,763	BCL11B,HOXD11
CHD2	0.000454054	-1.05472	0.615	0.861	1		947	ZNF560	806	ARCHS4 Coexpression,1262;Enrichr Queries,468;GTEx Coexpression,688	ANO1,SFRP1
LARP1	0.000457302	0.437184	1	0.694	1		948	ZNF618	806.3	ARCHS4 Coexpression,476;Enrichr Queries,532;GTEx Coexpression,1411	FST
TGDS	0.000458119	0.39805	0.692	0.268	1		949	ZNF441	807	ARCHS4 Coexpression,728;Enrichr Queries,831;GTEx Coexpression,862
TRIM22	0.00045882	1.1209	0.846	0.426	1		950	ZNF254	809	ARCHS4 Coexpression,131;Enrichr Queries,1030;GTEx Coexpression,1266	PCDHB2
TMEM37	0.000459517	-1.06884	0	0.545	1		951	NCOA3	809.3	ARCHS4 Coexpression,1251;Enrichr Queries,1347;ReMap ChIP-seq,244;GTEx Coexpression,395
RGS12	0.00046298	0.258443	0.462	0.115	1		952	PAX4	809.3	ARCHS4 Coexpression,1054;Enrichr Queries,613;GTEx Coexpression,761	ADH7
NECAB3	0.000463629	-1.07031	0.385	0.837	1		953	ZNF607	811	ARCHS4 Coexpression,370;Enrichr Queries,1059;GTEx Coexpression,1004	PCDHB2
PTGES	0.000483779	1.1766	0.615	0.234	1		954	ZBTB3	811.3	ARCHS4 Coexpression,686;Enrichr Queries,1268;GTEx Coexpression,480
MCM6	0.000490805	0.28235	0.462	0.12	1		955	DPF1	811.7	ARCHS4 Coexpression,1349;Enrichr Queries,393;GTEx Coexpression,693	BCL11B,FST
RPLP0	0.000492806	0.597184	1	0.976	1		956	GPBP1	813	ARCHS4 Coexpression,1161;GTEx Coexpression,465
SLC47A2	0.000503017	0.739252	0.308	0.057	1		957	ZBTB10	814.7	ARCHS4 Coexpression,1114;Enrichr Queries,1062;GTEx Coexpression,268	SSPN
OGFRL1	0.000503144	0.304015	0.538	0.182	1		958	ZBTB40	815.3	ARCHS4 Coexpression,673;Enrichr Queries,1061;GTEx Coexpression,712
GGT1	0.000503461	-0.758144	0	0.541	1		959	TLX2	816.3	ARCHS4 Coexpression,870;Enrichr Queries,485;GTEx Coexpression,1094	HOXD11
SLC25A1	0.000505765	0.592461	0.923	0.612	1		960	FOXR1	817.3	ARCHS4 Coexpression,1247;Enrichr Queries,494;GTEx Coexpression,711	PLAU
C5orf38	0.000509957	-0.448558	0.154	0.651	1		961	ZNF343	817.3	ARCHS4 Coexpression,779;Enrichr Queries,714;GTEx Coexpression,959	SNAI2
ZNF618	0.000510507	0.741638	0.385	0.086	1		962	ZKSCAN2	817.3	ARCHS4 Coexpression,280;Enrichr Queries,718;GTEx Coexpression,1454	BCL11B,PCDHB2
RPS25	0.000517706	0.468903	1	0.952	1		963	ZNF805	817.7	ARCHS4 Coexpression,679;Enrichr Queries,1029;GTEx Coexpression,745
DHX35	0.000518172	0.626725	0.538	0.167	1		964	E2F5	817.8	ARCHS4 Coexpression,1269;Enrichr Queries,1325;ReMap ChIP-seq,283;GTEx Coexpression,394
MSTO1	0.0005248	0.378466	0.692	0.282	1		965	ZNF350	819	ARCHS4 Coexpression,375;Enrichr Queries,1323;GTEx Coexpression,759	PODNL1
ANKEF1	0.000525379	0.393608	0.615	0.22	1		966	ZNF488	820	ARCHS4 Coexpression,1559;Enrichr Queries,81	SFRP1,PLAU,FST,SNAI2
PCNP	0.000527738	0.69241	1	0.608	1		967	NOTO	822	ARCHS4 Coexpression,904;Enrichr Queries,165;GTEx Coexpression,1397	BCL11B,SNAI2,HOXD11
SYNE1	0.00053415	-0.726218	0.077	0.612	1		968	FIGLA	822.3	ARCHS4 Coexpression,1164;Enrichr Queries,73;GTEx Coexpression,1230	SNAI2,ADH7,HOXD11,S100A8
EZR	0.000535441	-1.34268	0.923	0.99	1		969	ZSCAN32	823	ARCHS4 Coexpression,1373;GTEx Coexpression,273	AIM2
ATP6V1F	0.000538052	-0.921857	0.769	0.928	1		970	REL	823	ARCHS4 Coexpression,1322;Enrichr Queries,699;GTEx Coexpression,448	PLAU
SYDE2	0.000539102	-0.764694	0.154	0.656	1		971	ZNF35	824.7	ARCHS4 Coexpression,988;Enrichr Queries,647;GTEx Coexpression,839	PLAU
TMEM17	0.000541597	0.421576	0.308	0.057	1		972	IRF3	825.6	ARCHS4 Coexpression,1250;ENCODE ChIP-seq,47;Enrichr Queries,1173;ReMap ChIP-seq,134;GTEx Coexpression,1524	PODNL1
COA7	0.000541879	0.515358	0.462	0.129	1		973	ZNF689	825.7	ARCHS4 Coexpression,646;Enrichr Queries,678;GTEx Coexpression,1153	PLAU
SOX4	0.000544372	-1.33873	1	1	1		974	ZNF214	825.7	ARCHS4 Coexpression,126;Enrichr Queries,1197;GTEx Coexpression,1154	PCDHB2
AASS	0.000546645	-0.713102	0.154	0.722	1		975	MAFG	827	ARCHS4 Coexpression,926;Enrichr Queries,1014;ReMap ChIP-seq,50;GTEx Coexpression,1318	STEAP1B,BBOX1-AS1,KRT5
ORC3	0.000548266	0.809212	0.846	0.474	1		976	STAT5B	827.3	ARCHS4 Coexpression,1324;Enrichr Queries,998;ReMap ChIP-seq,191;GTEx Coexpression,796	PLAU
HSH2D	0.000551217	-1.17893	0	0.536	1		977	ONECUT3	827.7	ARCHS4 Coexpression,1378;Enrichr Queries,343;GTEx Coexpression,762	SFRP1,BCL11B
PLEKHA2	0.000553139	0.500205	0.538	0.158	1		978	MEF2D	828	ARCHS4 Coexpression,1215;Enrichr Queries,964;GTEx Coexpression,305	SSPN
PSAP	0.0005532	1.33976	1	0.957	1		979	PKNOX1	828.3	ARCHS4 Coexpression,948;Enrichr Queries,1176;ReMap ChIP-seq,272;GTEx Coexpression,917
LIMA1	0.000553636	1.11641	0.769	0.459	1		980	GZF1	830	ARCHS4 Coexpression,649;Enrichr Queries,729;GTEx Coexpression,1112
LAPTM4B	0.000554205	1.81343	0.846	0.708	1		981	ZNF469	831	ARCHS4 Coexpression,1538;GTEx Coexpression,124	STEAP1B,CD109,SNAI2
SLC31A2	0.000558027	0.421924	0.385	0.091	1		982	CUX2	831.7	ARCHS4 Coexpression,609;Enrichr Queries,395;GTEx Coexpression,1491	SFRP1,BCL11B
DUSP7	0.00056367	0.596284	0.615	0.206	1		983	ZC3H8	832.5	ARCHS4 Coexpression,1311;Enrichr Queries,1261;ReMap ChIP-seq,27;GTEx Coexpression,731	PLAU,CD109,KRT14,HOXA3
BICC1	0.000568591	0.362742	0.385	0.096	1		984	NR1H2	832.5	ARCHS4 Coexpression,1011;Enrichr Queries,940;ReMap ChIP-seq,86;GTEx Coexpression,1293	HOXA3,SSPN
LOXL4	0.000569363	2.0888	0.308	0.062	1		985	L3MBTL4	833.5	ARCHS4 Coexpression,1556;GTEx Coexpression,111	CASP14,GPR87,KRT14,PKP1,SERPINB5
HNRNPA1	0.000571253	0.736464	1	0.938	1		986	HSFX2	834	ARCHS4 Coexpression,834
CD74	0.00057198	-1.58479	1	1	1		987	ZNF558	834.3	ARCHS4 Coexpression,1312;Enrichr Queries,586;GTEx Coexpression,605	FST
BECN1	0.000572377	0.583057	0.692	0.316	1		988	ZNF347	834.7	ARCHS4 Coexpression,1314;Enrichr Queries,778;GTEx Coexpression,412
DPP3	0.000575991	0.728781	0.769	0.402	1		989	ZNF609	836.3	ARCHS4 Coexpression,435;Enrichr Queries,742;GTEx Coexpression,1332
TRNAU1AP	0.000576558	-0.92125	0.308	0.833	1		990	MYT1	836.7	ARCHS4 Coexpression,1267;Enrichr Queries,709;GTEx Coexpression,534	BCL11B
GEMIN2	0.000579068	0.294787	0.615	0.225	1		991	ZNF10	837.7	ARCHS4 Coexpression,1019;Enrichr Queries,1260;GTEx Coexpression,234	GJB7
ALDH2	0.000580335	-1.21524	0.615	0.952	1		992	ZNF677	837.7	ARCHS4 Coexpression,438;Enrichr Queries,692;GTEx Coexpression,1383	SFRP1
DENR	0.000591338	0.677909	0.923	0.598	1		993	ZNF282	838	ARCHS4 Coexpression,629;Enrichr Queries,918;GTEx Coexpression,967
DECR1	0.000593375	0.751055	0.846	0.598	1		994	ZNF230	838.3	ARCHS4 Coexpression,778;Enrichr Queries,962;GTEx Coexpression,775
HSPBP1	0.000593881	0.626494	0.846	0.45	1		995	SKOR1	839	ARCHS4 Coexpression,900;GTEx Coexpression,778
RNF2	0.000602739	0.407661	0.615	0.239	1		996	RAX2	839.7	ARCHS4 Coexpression,935;Enrichr Queries,1338;GTEx Coexpression,246	GJB7
PRDX4	0.000606757	0.895137	0.769	0.502	1		997	ZNF146	840.7	ARCHS4 Coexpression,445;Enrichr Queries,1018;GTEx Coexpression,1059
ALDH3A2	0.000612249	-1.19474	0.538	0.89	1		998	KLF10	841.7	ARCHS4 Coexpression,982;Enrichr Queries,650;GTEx Coexpression,893	PLAU
BIRC2	0.000612345	0.407236	0.615	0.22	1		999	MXI1	843.2	ARCHS4 Coexpression,1341;ENCODE ChIP-seq,57;Enrichr Queries,1243;ReMap ChIP-seq,206;GTEx Coexpression,1369	FABP5,FST
LAS1L	0.000612345	0.643637	0.615	0.22	1		1000	VSX1	843.3	ARCHS4 Coexpression,750;Enrichr Queries,1370;GTEx Coexpression,410
NR4A2	0.000613071	-1.13181	0.308	0.737	1		1001	ZNF582	843.7	ARCHS4 Coexpression,846;Enrichr Queries,664;GTEx Coexpression,1021	FST
SESN3	0.000618243	1.27898	0.538	0.215	1		1002	ZNF512	844	ARCHS4 Coexpression,174;Enrichr Queries,1085;GTEx Coexpression,1273	PCDHB2
ARRB1	0.000618973	-0.849796	0.154	0.627	1		1003	TEAD3	844	ARCHS4 Coexpression,999;Enrichr Queries,1233;GTEx Coexpression,300	HOXA3
SLC40A1	0.000623897	-0.834998	0.154	0.742	1		1004	ZNF302	844	ARCHS4 Coexpression,765;Enrichr Queries,1235;GTEx Coexpression,532
SDHA	0.000625511	0.990715	0.846	0.751	1		1005	E2F8	844.3	ARCHS4 Coexpression,714;Enrichr Queries,1184;GTEx Coexpression,635
HGH1	0.000636169	0.570491	0.538	0.182	1		1006	KLF17	844.3	ARCHS4 Coexpression,1008;Enrichr Queries,48;GTEx Coexpression,1477	ANO1,SFRP1,FST,SNAI2,ADH7
PDCL	0.000640038	0.521957	0.538	0.177	1		1007	RFX6	845.7	ARCHS4 Coexpression,659;Enrichr Queries,417;GTEx Coexpression,1461	SFRP1,ADH7
GAS2L1	0.00064389	0.299133	0.462	0.134	1		1008	ZNF770	847	ARCHS4 Coexpression,1060;Enrichr Queries,1335;GTEx Coexpression,146	GPR87,CLCA2,DSG3
RBM4B	0.000646299	0.477675	0.769	0.344	1		1009	TSHZ1	848.7	ARCHS4 Coexpression,1572;Enrichr Queries,577;GTEx Coexpression,397	BCL11B
GAA	0.000648351	0.449319	0.769	0.33	1		1010	GATAD2A	849	ARCHS4 Coexpression,390;Enrichr Queries,867;GTEx Coexpression,1290
ANKRD37	0.00064973	-0.911647	0.231	0.766	1		1011	ZKSCAN7	850	ARCHS4 Coexpression,612;GTEx Coexpression,1088
KRT7	0.000651615	-1.39234	0.692	0.967	1		1012	ATF5	850	ARCHS4 Coexpression,907;Enrichr Queries,1070;GTEx Coexpression,573
DNTTIP2	0.000657157	0.723603	1	0.742	1		1013	ZNF660	850.7	ARCHS4 Coexpression,924;Enrichr Queries,596;GTEx Coexpression,1032	BCL11B
TNNC1	0.000659361	-0.839944	0	0.526	1		1014	ZNF788P	852	ARCHS4 Coexpression,1219;Enrichr Queries,513;GTEx Coexpression,824	FST
RFK	0.000666836	1.0029	0.462	0.139	1		1015	CAMTA1	852.7	ARCHS4 Coexpression,997;Enrichr Queries,665;GTEx Coexpression,896	BCL11B
TMX1	0.000672194	0.839719	0.769	0.455	1		1016	MSX1	854.3	ARCHS4 Coexpression,919;Enrichr Queries,58;GTEx Coexpression,1586	SFRP1,PLAU,FST,SLC1A3,SNAI2
CANX	0.000672872	1.2422	0.923	0.943	1		1017	ZNF510	854.7	ARCHS4 Coexpression,712;Enrichr Queries,1365;GTEx Coexpression,487
PGK1	0.00067291	0.98675	0.923	0.818	1		1018	SAFB	855	ARCHS4 Coexpression,391;GTEx Coexpression,1319
GLB1	0.000676499	0.515698	0.769	0.359	1		1019	ZNF501	855	ARCHS4 Coexpression,1480;Enrichr Queries,832;GTEx Coexpression,253	SNAI2
AJUBA	0.000682521	0.628686	0.846	0.426	1		1020	DACH2	855.3	ARCHS4 Coexpression,563;Enrichr Queries,741;GTEx Coexpression,1262
KDSR	0.000684244	0.992716	0.615	0.239	1		1021	GPBP1L1	855.5	ARCHS4 Coexpression,876;GTEx Coexpression,835
PUS3	0.000691109	0.417642	0.538	0.163	1		1022	MBD3	855.8	ARCHS4 Coexpression,989;Enrichr Queries,1035;ReMap ChIP-seq,74;GTEx Coexpression,1325	HOXA3,PKP1
SNRPD2	0.000699547	0.403625	1	0.871	1		1023	ZNF174	856	ARCHS4 Coexpression,538;Enrichr Queries,1120;GTEx Coexpression,910
FAM86C1	0.000700431	0.306362	0.385	0.096	1		1024	ZBTB2	856.7	ARCHS4 Coexpression,1021;Enrichr Queries,1158;GTEx Coexpression,391
DOHH	0.000705687	0.395614	0.615	0.215	1		1025	SOX3	857	ARCHS4 Coexpression,818;Enrichr Queries,386;GTEx Coexpression,1367	SFRP1,FST
PTPN13	0.000715052	0.540731	0.615	0.244	1		1026	ZNF780B	857.7	ARCHS4 Coexpression,172;Enrichr Queries,985;GTEx Coexpression,1416	DGKH
UQCRFS1	0.000717803	0.84012	1	0.766	1		1027	ZBTB9	857.7	ARCHS4 Coexpression,1316;Enrichr Queries,1026;GTEx Coexpression,231	GJB7
UBTD1	0.000724992	-0.642819	0.154	0.67	1		1028	ASCL4	857.7	ARCHS4 Coexpression,1084;Enrichr Queries,1369;GTEx Coexpression,120	KRT17,KRT14,PKP1,SERPINB5
PNPO	0.000726429	0.380622	0.923	0.541	1		1029	E4F1	858.5	Literature ChIP-seq,163;ARCHS4 Coexpression,959;Enrichr Queries,758;GTEx Coexpression,1554
TM7SF2	0.000730853	-0.922571	0.231	0.722	1		1030	HSFY1	858.5	ARCHS4 Coexpression,500;GTEx Coexpression,1217
SLC25A43	0.000736941	0.26801	0.615	0.215	1		1031	ZNF628	859	ARCHS4 Coexpression,838;Enrichr Queries,734;GTEx Coexpression,1005
GRAMD2	0.000739219	-0.564571	0.231	0.67	1		1032	ZNF727	859.5	ARCHS4 Coexpression,1427;GTEx Coexpression,292	SSPN
C1QBP	0.000740567	0.633949	0.846	0.593	1		1033	ZNF440	860	ARCHS4 Coexpression,1202;Enrichr Queries,1309;GTEx Coexpression,69	CASP14,MIR205HG,GPR87,GJB5,PKP1,KRT5,SERPINB5
CPNE8	0.000744299	1.52814	0.923	0.593	1		1034	ZSCAN30	860.5	ARCHS4 Coexpression,1285;GTEx Coexpression,436
CCT8	0.000746103	0.718638	0.846	0.708	1		1035	TRPS1	860.7	ARCHS4 Coexpression,1524;Enrichr Queries,1057;GTEx Coexpression,1	ANO1,SFRP1,FABP5,KRT17,MIR205HG,GPR87,CLCA2,TMEM40,KRT5,DSG3,MDFI
ABHD13	0.000754152	0.927959	0.615	0.23	1		1036	MBD2	862.3	ARCHS4 Coexpression,1253;Enrichr Queries,813;ReMap ChIP-seq,78;GTEx Coexpression,1305	PODNL1,HOXA3
KLF12	0.000755922	0.386419	0.231	0.033	1		1037	NACC2	863	ARCHS4 Coexpression,1532;GTEx Coexpression,194	SLC1A3
HLA-DPB1	0.000756377	-1.5681	0.462	0.871	1		1038	ZNF382	863.3	ARCHS4 Coexpression,1323;Enrichr Queries,533;GTEx Coexpression,734	BCL11B
ABCF2	0.000757685	0.351106	0.923	0.469	1		1039	ZSCAN20	863.3	ARCHS4 Coexpression,596;Enrichr Queries,792;GTEx Coexpression,1202
OLA1	0.000765654	0.530492	0.923	0.589	1		1040	ZNF207	864.5	ARCHS4 Coexpression,1376;Enrichr Queries,767;ReMap ChIP-seq,261;GTEx Coexpression,1054
TRIM59	0.000770037	0.625246	0.769	0.373	1		1041	ZNF554	864.7	ARCHS4 Coexpression,1033;Enrichr Queries,865;GTEx Coexpression,696
HLA-DRB1	0.000773057	-1.54077	0.769	0.986	1		1042	FBXL19	865	ARCHS4 Coexpression,970;GTEx Coexpression,760
FEN1	0.000775561	1.07024	0.538	0.187	1		1043	NFE4	865	GTEx Coexpression,865
SDPR	0.000777139	-1.23439	0.077	0.593	1		1044	ZNF875	865.3	ARCHS4 Coexpression,839;Enrichr Queries,739;GTEx Coexpression,1018
2025-09-08	0.000778102	0.256406	0.538	0.167	1		1045	YBX2	865.7	ARCHS4 Coexpression,1094;Enrichr Queries,441;GTEx Coexpression,1062	SFRP1,FST
RPL15	0.000779402	0.829251	1	1	1		1046	ZNF620	866	ARCHS4 Coexpression,1320;Enrichr Queries,949;GTEx Coexpression,329	GPR87
PPAP2A	0.00078642	1.0084	0.538	0.215	1		1047	ZNF883	866.5	ARCHS4 Coexpression,148;GTEx Coexpression,1585	PCDHB2
PCID2	0.000798407	0.385305	0.692	0.254	1		1048	SMAD5	866.5	ARCHS4 Coexpression,1510;Enrichr Queries,558;ReMap ChIP-seq,269;GTEx Coexpression,1129	BCL11B
SLC2A8	0.000803478	0.542575	0.615	0.23	1		1049	BPTF	867	ARCHS4 Coexpression,746;GTEx Coexpression,988
BRIX1	0.000803507	0.657598	0.846	0.555	1		1050	ARX	867.7	ARCHS4 Coexpression,760;Enrichr Queries,375;GTEx Coexpression,1468	SFRP1,BCL11B
IGFBP2	0.000808218	-2.81576	0.615	0.847	1		1051	HSF5	868.7	ARCHS4 Coexpression,685;Enrichr Queries,387;GTEx Coexpression,1534	BCL11B,ADH7
PID1	0.000812535	-0.764153	0.154	0.732	1		1052	ZNF671	868.7	ARCHS4 Coexpression,780;Enrichr Queries,1166;GTEx Coexpression,660
NDST1	0.000814517	0.357097	0.692	0.282	1		1053	THAP8	869	ARCHS4 Coexpression,530;Enrichr Queries,732;GTEx Coexpression,1345
CCNE1	0.000820074	1.08299	0.462	0.148	1		1054	ZNF354A	869	ARCHS4 Coexpression,1421;Enrichr Queries,514;GTEx Coexpression,672	FST
PSMB7	0.000824655	0.770091	0.923	0.694	1		1055	ARNTL	869.8	ARCHS4 Coexpression,983;Enrichr Queries,1363;ReMap ChIP-seq,19;GTEx Coexpression,1114	MFAP5,PODNL1,PLAU,SSPN,BBOX1-AS1
ZNF419	0.000825539	1.05224	0.462	0.129	1		1056	ZBED9	870	ARCHS4 Coexpression,827;GTEx Coexpression,913
TMED9	0.000828027	1.05363	1	0.909	1		1057	ZNF827	873.7	ARCHS4 Coexpression,953;Enrichr Queries,546;GTEx Coexpression,1122	BCL11B
RELL1	0.000837399	0.981275	0.769	0.388	1		1058	ZKSCAN4	874.3	ARCHS4 Coexpression,495;Enrichr Queries,1049;GTEx Coexpression,1079
ASCC1	0.000843198	0.44718	0.615	0.239	1		1059	HIVEP1	875.3	ARCHS4 Coexpression,1158;Enrichr Queries,1069;GTEx Coexpression,399
CTSS	0.000846182	-0.538715	0.231	0.866	1		1060	RBPJ	875.4	Literature ChIP-seq,11;ARCHS4 Coexpression,1490;Enrichr Queries,1161;ReMap ChIP-seq,214;GTEx Coexpression,1501	ANO1,ANXA8L1,KRT17,SAA1,ANXA8,IGFL1,S100A8,MDFI,S100A7
NCOA3	0.000849828	0.854468	0.923	0.593	1		1061	ZNF260	876	ARCHS4 Coexpression,122;Enrichr Queries,1114;GTEx Coexpression,1392	PCDHB2
[truncated: 3,714 more rows]

## Sheet: ST7 - Organoid GSEA
Hallmark Gene Sets												Gene Ontology Gene Sets												Cell type Gene Sets												KEGG Gene Sets												Reactome Gene Sets
[truncated: 8,668 more rows]
[truncated: 7 more columns]
